# Supplementary material for: Functional genomics screen with pooled shRNA library and gene expression profiling with extracts of Azadirachta indica identify potential pathways for therapeutic targets in head and neck squamous cell carcinoma
Source: PeerJ. 2019 Mar 1;7:e6464. doi: 10.7717/peerj.6464 (PMC6398373; doi:10.7717/peerj.6464)
Supplement: Table S1 [file peerj-07-6464-s003.xlsx]

## Sheet: Supplementary_Table_1
Table S1. Expression values for all genes at various time points and rescue experiment along with fold change statistics and cancer-specific pathways
	Raw																								Normalized
	3999213029												3999213030												3999213029												3999213030
	A	B	C	D	E	F	G	H	I	J	K	L	A	B	C	D	E	F	G	H	I	J	K	L	A	B	C	D	E	F	G	H	I	J	K	L	A	B	C	D	E	F	G	H	I	J	K	L
	1	2	3	4	5	6	7	8	9	10	11	12	13	14	15	16	17	18	19	20	21	22	23	24	1	2	3	4	5	6	7	8	9	10	11	12	13	14	15	16	17	18	19	20	21	22	23	24
Genes	Leaf 5 min	10 min	15 min	30 min	1 hr	3 hr	6 hr	10 hr	24 hr	DMSO (0.125%) 3 hr	DMSO (0.125%) 10 hr	Cells only	Leaf Rescue 5min	Rescue 10 min	Rescue 15 min	Rescue 30 min	Rescue 1hr	Rescue 3hr	Rescue 6hr	Rescue 10hr	Rescue 24hr	Rescued 24hr DMSO	DMSO (0.04%) 24 hr	Only cells	Leaf 5 min	10 min	15 min	30 min	1 hr	3 hr	6 hr	10 hr	24 hr	DMSO (0.125%) 3 hr	DMSO (0.125%) 10 hr	Cells only	Leaf Rescue 5min	Rescue 10 min	Rescue 15 min	Rescue 30 min	Rescue 1hr	Rescue 3hr	Rescue 6hr	Rescue 10hr	Rescue 24hr	Rescued 24hr DMSO	DMSO (0.04%) 24 hr	Only cells
7A5	5.56083	9.86191	0.206848	8.46376	-0.9858	8.92835	2.25045	2.03615	1.9042	5.96167	5.43804	0.750322	-3.74761	1.33468	-1.79913	3.20471	-0.319549	-0.00751874	-1.747	1.04576	5.93661	3.95512	3.09156	7.71868	5.09671	5.22822	4.93311	5.20629	4.89424	5.12621	5.01085	5.01706	5.00139	5.10253	5.09238	4.93899	4.79575	4.95502	4.87483	5.02332	4.90898	4.91592	4.86075	4.94205	5.12924	5.04948	5.03418	5.15732
A1BG	13.808	10.8369	7.40134	12.3639	15.3853	18.98	9.79737	6.26897	4.16912	5.6965	6.0398	2.93363	2.74032	0.305409	15.5477	13.5769	7.47494	6.32139	7.20373	6.12176	3.49271	7.45017	10.2055	14.0435	5.34186	5.25746	5.16049	5.33112	5.36649	5.33337	5.2773	5.18276	5.09992	5.09523	5.11087	5.00454	5.00085	4.92177	5.37004	5.29104	5.14016	5.11483	5.13274	5.11542	5.04631	5.16118	5.29072	5.352
A1CF	-0.367891	1.28705	4.32379	0.335046	-3.99853	-1.22924	1.68746	0.786258	-1.83812	2.88659	-2.9194	0.336491	-0.301564	2.58685	-2.80533	-1.11716	0.957659	-0.188155	-0.841484	4.2092	1.22106	1.20445	1.65557	-2.14617	4.89903	4.96364	5.06473	4.94499	4.79881	4.88885	4.99086	4.96878	4.85382	5.00872	4.83891	4.92556	4.90685	4.99266	4.8444	4.89164	4.94976	4.91009	4.88909	5.05114	4.9738	4.96087	4.98373	4.85854
A26C3	-4.63785	-2.73492	-4.95969	-7.03483	-3.57269	-4.59498	-2.99311	-5.40532	-2.35233	-2.50745	-2.52636	-6.62781	-3.78979	-8.90869	-5.68831	-3.79221	-5.422	-7.85837	-4.15172	-9.75988	-6.05188	-10.1646	-2.07748	-5.71429	4.7529	4.83328	4.76427	4.70873	4.81287	4.8007	4.8282	4.73612	4.8358	4.84593	4.85156	4.70008	4.7947	4.62324	4.75446	4.80581	4.74385	4.65627	4.78349	4.56738	4.74006	4.5989	4.86091	4.74767
A2BP1	-1.76129	-3.27555	-1.01334	-1.09424	-0.128371	-1.03489	0.0776025	-2.63717	0.316767	-1.91288	0.288239	0.238897	-0.764376	-0.02635	1.76123	-0.667228	-1.44966	0.854326	2.25356	1.45999	0.251936	-0.370015	-4.10235	-1.60069	4.85058	4.81652	4.89283	4.89903	4.92244	4.89351	4.93587	4.83799	4.9406	4.86382	4.93741	4.92231	4.8919	4.91107	4.98515	4.90624	4.87563	4.94495	4.98876	4.95689	4.94117	4.91367	4.79423	4.8752
A2LD1	148.014	171.359	163.367	164.541	151.7	187.619	74.0735	38.7008	22.9825	126.564	133.626	90.4938	130.751	100.034	103.35	104.978	136.85	108.87	123.644	58.148	55.629	67.0292	37.1484	63.5204	7.19772	7.41596	7.39226	7.42946	7.20847	7.12103	6.72249	6.2779	6.01668	7.00404	7.07212	6.57465	6.99163	6.69853	6.81259	6.73731	7.11306	6.8766	7.00345	6.49051	6.40515	6.41507	6.12611	6.37692
A2M	-6.14414	-5.46348	-9.97727	-4.28469	-7.66687	2.08827	-0.993576	-3.42887	-1.27553	-1.7273	-5.27619	-0.488569	-3.70181	-1.91577	-4.83082	-8.88145	-3.24078	-1.67894	-3.70027	-2.62925	-6.11023	-1.81785	-0.00569321	-7.53741	4.69822	4.74655	4.6064	4.79423	4.6859	4.97282	4.89757	4.8094	4.87625	4.86953	4.7653	4.90043	4.79757	4.84779	4.78096	4.62842	4.81376	4.86241	4.79855	4.81958	4.73801	4.86857	4.92847	4.69241
A2ML1	13.3733	16.3189	5.5361	8.55988	12.0369	19.8625	11.9975	12.6191	1.20847	20.2365	20.3646	13.2279	10.8574	13.1937	16.9113	15.1099	8.17275	7.94122	5.54869	0.411754	11.6784	18.3901	12.1646	10.3797	5.3293	5.40914	5.10297	5.21082	5.27483	5.34828	5.35831	5.45612	4.97439	5.49255	5.504	5.2773	5.22659	5.28392	5.40493	5.32912	5.1611	5.15845	5.08733	4.92118	5.32654	5.47913	5.35914	5.238
A3GALT2	3.5884	-5.85738	-1.0109	-0.0975709	-2.32362	2.09503	-0.369327	3.38049	-2.70472	2.789	-0.814708	1.86247	1.00117	0.737675	-0.333366	-1.82995	1.85201	-0.0542793	-2.28369	0.395621	-2.60554	-0.924977	-1.12603	-2.81793	5.03088	4.73423	4.893	4.93138	4.85129	4.97293	4.92037	5.06857	4.82178	5.00563	4.90368	4.97328	4.94677	4.9361	4.9225	4.86888	4.97774	4.91445	4.84263	4.92069	4.84959	4.89611	4.89243	4.83763
A4GALT	64.1474	59.6978	63.9193	50.4708	52.937	50.6403	35.1576	30.3973	33.6402	36.5528	46.0772	51.5343	47.6914	43.846	49.7042	35.5904	44.7991	33.6303	26.0232	24.0052	60.2708	22.1415	42.3626	59.3178	6.31704	6.27436	6.37362	6.1939	6.13436	5.86425	6.03317	6.0593	6.34805	5.85344	6.03379	6.04476	5.9925	5.93695	6.09458	5.7765	5.96552	5.78826	5.61558	5.71773	6.48273	5.57473	6.24972	6.31402
A4GNT	14.2697	7.98114	6.08923	8.86452	7.15096	-0.569272	8.54228	1.48789	3.70782	11.0142	4.09889	10.1904	9.79828	8.23963	4.89549	2.89247	5.83601	6.09655	11.8644	11.3775	6.78024	6.35495	2.44307	-1.00108	5.35355	5.17155	5.12093	5.21872	5.13534	4.9056	5.23399	4.99559	5.07757	5.25315	5.05274	5.20868	5.19837	5.15802	5.08029	5.01395	5.09505	5.1085	5.2618	5.29588	5.15827	5.12505	5.01023	4.89394
AAA1	0.0778277	-2.41206	-1.23344	1.38462	-1.2629	3.53126	2.7048	0.506271	0.891766	1.61912	-2.64012	0.0104907	1.33909	5.11873	1.1322	0.254791	2.00504	1.88253	0.0247656	3.75494	2.15808	4.00459	2.33702	1.94595	4.91418	4.84421	4.88675	4.97781	4.8858	5.0076	5.02604	4.95767	4.96254	4.96992	4.84792	4.91547	4.95689	5.06887	4.96654	4.93403	4.98296	4.97643	4.91672	5.03596	5.00328	5.05082	5.00591	4.98457
AAAS	36.8293	44.6449	43.6777	43.0842	54.3734	65.2388	28.4883	11.4306	14.2763	46.855	55.2718	38.9366	37.9611	37.813	46.8102	37.3599	29.5286	53.7356	45.8466	44.0109	34.4819	47.8827	27.376	56.0063	5.86943	6.0276	6.05617	6.05699	6.15174	6.04776	5.87195	5.40114	5.64076	6.04638	6.17607	5.82548	5.81852	5.82233	6.04841	5.8059	5.67605	6.16291	6.00575	6.21272	5.98502	6.11934	5.87445	6.26433
AACS	127.729	120.561	148.046	128.115	127.151	161.39	154.247	197.468	114.698	109.549	148.706	131.485	118.265	134.696	110.464	120.852	129.886	105.696	130.273	95.2073	120.003	139.598	113.344	151.617	7.01436	6.95589	7.25991	7.12332	6.97382	6.92804	7.64958	8.20565	7.74994	6.82675	7.20094	6.999	6.86079	7.04284	6.88775	6.91103	7.03432	6.83635	7.07752	7.07212	7.32702	7.27321	7.43796	7.37668
AADAC	0.0819811	0.161228	-0.162903	0.754594	-1.97452	-4.82462	7.9657	2.7669	5.77327	-1.77723	2.13139	0.0631198	5.69636	0.961201	1.7281	1.34992	-2.68965	8.01052	-2.96956	2.25083	0.363094	8.18638	3.85343	9.56278	4.91425	4.92691	4.92115	4.95797	4.86221	4.79371	5.21314	5.04513	5.17939	4.86788	4.99141	4.91692	5.08986	4.94367	4.98428	4.96887	4.83255	5.1604	4.82013	4.98396	4.9452	5.18208	5.06027	5.21182
AADACL1	754.555	606.092	612.868	655.674	790.68	1248.14	666.366	428.517	320.698	792.374	877.821	747.78	767.978	873.671	541.955	671.601	718.859	663.423	673.766	470.647	525.236	629.113	476.52	1037.06	9.32485	9.04006	9.03712	9.23722	9.37358	9.70195	9.57316	9.21673	9.00207	9.39941	9.54028	9.41628	9.43126	9.66625	9.04954	9.33463	9.44403	9.34753	9.37737	9.29212	9.32573	9.35443	9.4055	9.94235
AADACL2	3.93405	-1.21047	7.28641	3.28008	1.98424	-1.10145	1.49751	-1.24787	-1.33036	-0.344322	-5.92007	-3.55406	0.762227	1.27201	0.596848	-3.74397	-1.57391	-1.00142	4.38586	-0.15006	-0.923145	0.971221	3.00738	1.535	5.04314	4.88317	5.15762	5.03813	4.98607	4.8919	4.98403	4.88991	4.87465	4.91169	4.74374	4.80208	4.93899	4.95326	4.94989	4.80717	4.8717	4.88451	5.05377	4.90273	4.90346	4.95365	5.03129	4.97125
AADACL4	3.54601	9.59427	3.4057	7.24231	5.49849	7.71771	-4.7011	4.14769	1.3087	-3.0503	14.2288	-2.88476	2.66781	6.062	6.03558	5.57412	6.06837	2.10739	5.75832	7.28921	3.68019	0.453308	6.07353	-0.917374	5.0289	5.21992	5.03471	5.16781	5.08882	5.10053	4.76728	5.09671	4.97807	4.82954	5.34482	4.8231	4.99855	5.09671	5.11476	5.0898	5.10006	4.98302	5.09455	5.15618	5.05245	4.93845	5.13727	4.89677
AADAT	0.164056	5.43833	3.35768	2.01	2.83097	2.05876	-3.49947	-0.993575	1.05516	1.95797	2.18189	1.10281	2.17294	5.2005	2.97028	3.13003	2.60424	3.79086	2.12488	-1.04534	2.46105	-1.06003	0.636465	0.987198	4.91631	5.09255	5.03329	4.99742	5.01242	4.97203	4.81121	4.8983	4.96856	4.97937	4.99299	4.95041	4.98296	5.0722	5.02381	5.02115	5.00076	5.03625	4.98396	4.873	5.01216	4.89202	4.94989	4.9562
AAGAB	280.246	302.505	276.469	269.132	256.149	354.851	185.534	119.16	58.4623	308.287	268.43	273.084	308.767	312.892	328.047	375.02	280.472	306.27	249.438	220.366	182.211	247.58	173.814	223.543	8.01447	8.12554	8.03389	8.05766	7.87134	7.97439	7.87811	7.57599	6.92424	8.15746	7.96718	8.00021	8.14804	8.21132	8.34165	8.46335	8.10478	8.26954	7.96	8.21566	7.88986	8.03253	8.0072	7.88793
AAK1	133.093	128.615	116.296	99.4037	98.1047	112.185	70.1486	68.7628	62.7953	89.7295	73.485	68.6191	69.225	66.6118	73.0931	84.9013	67.1311	73.1393	64.177	44.8039	35.8612	53.7322	42.2235	42.8907	7.05775	7.03432	6.96784	6.81942	6.6915	6.52847	6.65797	6.86567	7.01436	6.61775	6.43453	6.29683	6.30447	6.29168	6.43634	6.50186	6.30935	6.44285	6.29879	6.22902	6.01714	6.21945	6.24596	6.0326
AAMP	202.33	169.04	232.695	169.179	182.555	327.259	343.515	235.871	133.867	197.088	202.673	221.301	180.143	175.031	254.123	216.844	198.534	211.284	211.076	149.492	123.294	193.54	108.45	160.362	7.61035	7.39941	7.82184	7.46712	7.43946	7.8708	8.69011	8.45429	7.93107	7.57501	7.61182	7.72337	7.42428	7.40334	8.00021	7.70191	7.62323	7.75886	7.71777	7.70323	7.36341	7.70323	7.38507	7.44563
AANAT	-0.836697	-5.23744	-6.60895	-2.56611	-5.92038	-4.17888	-6.68978	-0.756685	-2.26516	0.54747	-5.4402	-1.81206	3.24698	-1.61891	-5.78092	-6.02888	-1.41023	1.49308	-4.0415	-3.84525	-7.44104	-4.76914	-4.4621	-2.67308	4.88266	4.75339	4.70739	4.85125	4.73935	4.81281	4.69966	4.90783	4.83838	4.93821	4.76035	4.85871	5.01674	4.85841	4.75154	4.73612	4.87672	4.9647	4.78713	4.77602	4.69761	4.77804	4.78145	4.8421
AARS	2239.94	2016.97	2093.04	2035.94	2144.25	4500.88	4374.2	3516.42	2155.39	1910.58	2069.07	4029.16	3928.61	3901.17	4243.52	3404.54	3572.58	3503.66	3374.98	1801.36	2600.4	2165.2	2498.33	2345.72	10.8669	10.7246	10.7641	10.8536	10.7867	11.555	12.1536	11.986	11.1447	10.6972	10.8242	11.9536	11.8542	11.8653	11.9593	11.7764	11.8591	11.7999	11.8323	11.2611	11.5732	11.1327	11.6803	11.1298
AARS2	105.767	129.964	100.058	105.694	119.1	155.757	104.723	74.506	36.2373	122.27	168.843	176.266	150.837	179.315	193.158	185.754	169.695	150.08	169.039	146.636	180.464	171.334	149.205	193.28	6.79462	7.0447	6.79137	6.88408	6.90273	6.88636	7.13336	6.96038	6.41762	6.95791	7.37357	7.39226	7.17246	7.44366	7.62771	7.49731	7.41128	7.29741	7.43398	7.67505	7.87888	7.55642	7.7976	7.69495
AARSD1	457.89	520.815	496.426	458.016	440.994	568.854	326.916	203.891	155.534	469.553	456.866	408.7	349.947	358.088	437.394	372.878	338.337	355.616	396.28	365.899	392.151	472.473	322.783	428.629	8.65011	8.83274	8.76628	8.75372	8.58315	8.59241	8.61641	8.24501	8.10788	8.70843	8.66133	8.55224	8.31826	8.39017	8.73635	8.45733	8.35374	8.46113	8.61177	8.92411	8.92751	8.91817	8.87151	8.74454
AASDH	30.4811	45.5695	24.611	22.4186	30.2575	46.323	29.9369	31.5053	10.3414	28.6344	22.1004	49.3546	44.6634	43.098	36.9985	42.8965	37.1257	40.7522	35.0673	27.492	46.7986	45.3982	32.9501	33.7449	5.73896	6.04741	5.65001	5.60599	5.71077	5.80331	5.90967	6.09237	5.43943	5.6881	5.55313	6.01072	5.94249	5.92709	5.85928	5.9086	5.82986	5.92796	5.80331	5.81627	6.23654	6.06731	6.03317	5.84948
AASDHPPT	213.775	216.588	173.978	214.835	175.445	254.289	61.8427	48.916	27.5692	187.837	203.935	186.546	180.753	148.215	104.141	107.933	181.302	183.571	178.579	125.053	71.6143	107.158	61.3552	112.921	7.68808	7.71163	7.4719	7.77941	7.3914	7.54619	6.53322	6.51309	6.17093	7.49731	7.62012	7.47139	7.42946	7.17836	6.81862	6.7732	7.50591	7.56563	7.51276	7.44423	6.66998	6.91813	6.6253	6.99199
AASS	6.86448	6.42502	1.56614	1.38719	10.0626	17.2826	9.34046	26.2361	35.8752	5.8235	6.43716	10.8247	4.97908	9.04822	6.787	9.92218	8.25943	6.97046	6.7854	6.80032	13.714	15.4909	7.86044	10.6985	5.13866	5.12235	4.97746	4.97797	5.22137	5.29493	5.26222	5.9379	6.40476	5.09848	5.1231	5.22276	5.06778	5.17832	5.13629	5.20135	5.16468	5.1338	5.1216	5.14016	5.39316	5.39742	5.20088	5.24763
AATF	773.206	775.268	782.068	726.328	760.008	828.737	449.987	332.138	305.125	672.943	676.992	557.168	526.391	542.672	508.62	509.775	459.567	481.216	479.103	325.694	283.456	518.313	243.658	424.356	9.35275	9.36635	9.35533	9.37457	9.32755	9.11702	9.02655	8.88209	8.94466	9.19296	9.19387	8.99889	8.88409	8.97221	8.95449	8.90729	8.77916	8.87992	8.86727	8.75995	8.46646	9.05174	8.46763	8.73215
AATK	2.50786	9.55998	-1.20961	3.41509	6.2986	2.48175	4.91256	-2.26289	4.24158	8.61816	5.19622	5.18598	0.365659	2.70137	8.47913	5.81314	8.18135	3.61628	8.32317	7.29811	2.39664	1.66225	4.80194	4.5972	4.99599	5.2184	4.8872	5.04261	5.11194	4.98319	5.10273	4.85151	5.10297	5.18294	5.08432	5.07177	4.92606	4.99648	5.18264	5.09581	5.16155	5.03107	5.16302	5.15652	5.00999	4.97612	5.09325	5.06321
ABAT	6.22714	-0.168174	3.62372	3.67315	4.14958	8.92057	1.14465	10.0398	8.46439	0.616066	9.26791	8.04738	6.86511	6.53149	8.85403	0.896132	2.04771	4.41291	3.00806	-1.49197	2.81692	1.58824	3.60191	0.58567	5.11635	4.91626	5.04214	5.05182	5.04978	5.12603	4.97176	5.34346	5.33278	4.9406	5.2075	5.15209	5.11981	5.11234	5.19416	4.95431	4.98392	5.05571	5.01057	4.85814	5.02415	4.97356	5.05228	4.94411
ABCA1	340.365	246.558	205.771	208.12	281.133	542.153	542.109	323.179	311.382	294.135	237.841	69.7336	73.7208	79.1176	59.796	85.7321	118.754	126.035	163.446	107.486	131.044	115.047	116.438	122.056	8.26412	7.86971	7.67455	7.73488	8.00315	8.53022	9.27206	8.84779	8.96596	8.08321	7.83065	6.31044	6.36147	6.45375	6.25663	6.51309	6.92706	7.06806	7.39467	7.23363	7.4499	7.01217	7.47288	7.0986
ABCA10	1.71661	1.96575	1.69914	0.537549	1.04298	12.8356	0.0596658	0.305785	-0.158991	-0.645146	2.98504	0.448671	2.51713	0.308457	0.362896	4.03796	-0.785869	0.477341	2.97057	6.50198	3.38053	6.12477	6.08467	1.4975	4.96976	4.98434	4.98146	4.95156	4.95807	5.20549	4.93523	4.94982	4.92089	4.90288	5.0181	4.92931	4.99336	4.92183	4.94308	5.04598	4.89438	4.93152	5.00959	5.12864	5.04246	5.11774	5.13798	4.97026
ABCA11	21.9134	28.8329	16.0223	17.0766	16.0176	28.5935	25.4307	12.6938	6.46096	16.9472	27.1576	20.1445	20.3861	22.2124	5.07685	23.3734	17.871	16.4538	12.4892	17.5972	20.0781	29.1041	15.7821	21.2547	5.54415	5.71297	5.41505	5.47108	5.3832	5.50894	5.79527	5.45919	5.21872	5.40842	5.66299	5.44294	5.45737	5.49736	5.086	5.51495	5.41183	5.39188	5.27878	5.51191	5.59121	5.73357	5.4873	5.55247
ABCA12	8.59956	9.18944	3.14368	2.55963	5.62187	9.00974	5.00824	5.43418	3.55996	2.45552	4.96507	7.10973	8.82149	6.1345	3.9814	0.990297	5.31961	4.24624	7.09291	10.8935	7.2925	4.1422	11.1736	8.22831	5.18837	5.20852	5.0269	5.01573	5.09238	5.12797	5.10641	5.14926	5.07125	4.99417	5.07764	5.12658	5.17315	5.09891	5.05257	4.95727	5.07933	5.05069	5.13	5.27965	5.17832	5.05488	5.32796	5.17155
ABCA13	61.8419	36.1093	46.0917	48.8565	53.0101	77.2643	28.8156	26.2541	17.8403	65.71	155.538	105.891	130.503	92.8144	73.2667	92.3647	101.054	99.7994	125.25	132.565	171.828	156.408	186.715	226.556	6.2822	5.85699	6.10024	6.16391	6.13505	6.18141	5.88017	5.93856	5.811	6.32877	7.259	6.74714	6.98834	6.61775	6.43856	6.5951	6.73569	6.77054	7.02196	7.52179	7.81071	7.42695	8.10144	7.90649
ABCA2	17.6322	25.9615	14.7514	14.3393	30.3803	35.9204	14.7886	4.07723	3.06915	18.5276	24.0406	32.7372	33.6066	41.8498	40.9611	46.4992	33.8736	24.481	28.2645	39.0818	43.2426	44.0354	44.7477	39.9472	5.44139	5.65184	5.38257	5.39153	5.71193	5.64203	5.45919	5.09421	5.04985	5.44964	5.59842	5.71458	5.7368	5.9059	5.93406	5.96366	5.76817	5.58259	5.66431	6.11144	6.16796	6.0411	6.3049	5.9758
ABCA3	-5.33497	-0.645817	-7.03201	3.0532	-1.91092	11.8278	-1.85185	-0.472856	-6.55845	-5.81245	-1.92146	-6.37286	0.467252	-2.47087	0.567009	-6.93703	1.10883	-9.10163	-3.83668	3.49828	3.63427	-0.943596	4.64511	-2.89825	4.73013	4.90184	4.69349	5.03085	4.86464	5.18621	4.86646	4.91859	4.68085	4.74296	4.87064	4.70853	4.92943	4.83074	4.94924	4.70672	4.95381	4.6176	4.79371	5.0264	5.05092	4.8957	5.0878	4.83525
ABCA4	1.23876	9.68403	1.96149	8.62131	4.21872	5.85247	1.8319	8.3636	4.77813	2.49856	3.51666	0.38833	2.87587	6.25348	0.441048	0.812631	3.78395	5.7038	10.6014	3.79761	7.49589	2.10018	10.9436	13.0597	4.95487	5.22411	4.9906	5.21274	5.0517	5.05826	4.99591	5.27135	5.12739	4.99551	5.03455	4.92745	5.00478	5.10266	4.94538	4.95179	5.03547	5.09466	5.22704	5.03724	5.18496	4.99072	5.31946	5.32095
ABCA5	3.20054	-0.9025	0.748652	0.427034	-0.506232	2.82797	2.29204	2.00675	7.08459	-1.3419	2.00688	3.92039	4.69398	4.84758	-1.58567	1.37232	4.74021	8.2757	6.53566	5.19492	6.05523	-0.144224	3.06696	1.1859	5.01847	4.89251	4.94897	4.94772	4.91032	4.99086	5.01233	5.01605	5.25179	4.88129	4.98709	5.03398	5.05913	5.06126	4.88231	4.96942	5.06397	5.16833	5.11679	5.08384	5.1336	4.9204	5.0334	4.96195
ABCA6	1.7014	1.73944	-1.26426	3.18752	-0.663973	0.685859	4.68693	2.4492	0.306227	-0.0543711	3.37624	4.2819	3.71275	4.71427	0.661217	0.581903	-0.865578	4.4246	1.74019	0.844252	5.33493	3.77624	2.83944	2.46296	4.96923	4.97713	4.88602	5.03545	4.90435	4.93792	5.09537	5.0324	4.94023	4.91996	5.03065	5.04474	5.03003	5.05688	4.95223	4.944	4.8924	5.05599	4.97131	4.93553	5.10864	5.04412	5.02449	4.99952
ABCA7	62.6894	65.2645	61.2266	54.7472	55.2785	60.0964	26.8463	15.2934	14.8809	46.6506	47.8529	71.2396	55.4542	63.2002	89.9988	78.6551	56.193	61.0242	60.0598	91.0029	98.4138	77.4343	87.6738	71.4495	6.29646	6.3547	6.34056	6.26505	6.16291	5.98888	5.83398	5.57534	5.66925	6.04191	6.06142	6.32812	6.10663	6.24194	6.65725	6.43375	6.15093	6.28009	6.23166	7.01474	7.07212	6.56968	7.07527	6.49639
ABCA8	1.86151	0.36203	0.468124	0.67502	4.62216	0.151954	-1.57391	-2.94448	1.50794	2.43177	2.26851	3.82466	1.86262	0.447163	2.1023	4.32192	1.46558	0.793823	4.36592	10.0374	5.33323	3.33258	1.49108	1.0863	4.97466	4.93395	4.93997	4.95575	5.06468	4.92486	4.8766	4.82659	4.98589	4.99355	4.99568	5.03129	4.97301	4.92704	4.99519	5.05483	4.96545	4.94295	5.05311	5.2505	5.10844	5.02935	4.97778	4.95938
ABCA9	5.25727	0.059597	4.66311	1.3307	-1.98543	8.18368	2.49127	7.39596	3.43667	3.66895	1.0013	2.25475	3.99569	3.10332	0.389126	1.89618	5.03052	1.02374	3.26006	1.91629	6.82413	6.57925	6.00762	8.28035	5.08759	4.92368	5.07591	4.97604	4.8617	5.11123	5.01833	5.23122	5.06573	5.03211	4.95787	4.98575	5.0393	5.01066	4.94386	4.98486	5.07118	4.95037	5.01867	4.97298	5.15995	5.13188	5.1343	5.1742
ABCB1	-3.67062	2.15696	0.323086	-0.551673	4.89004	20.7856	43.2937	28.0419	21.3985	-5.04716	3.85764	3.44996	2.20147	4.48605	-1.27161	0.346063	3.78799	3.35906	0.447404	1.37979	-1.1625	4.20319	1.38108	0.363861	4.78487	4.99014	4.93607	4.91539	5.07177	5.36602	6.19589	5.99906	5.95717	4.76832	5.04605	5.01969	4.98373	5.05086	4.8926	4.93702	5.03564	5.02308	4.93016	4.95435	4.89586	5.05698	4.97426	4.937
ABCB10	178.463	161.513	180.856	194.808	139.313	159.73	64.6734	27.0394	19.9287	197.682	183	132.459	126.698	131.482	71.0388	127.822	155.856	108.791	137.908	62.1182	107.346	160.73	78.2773	175.767	7.44079	7.34168	7.51607	7.6589	7.08937	6.91488	6.57957	5.96341	5.90082	7.57891	7.47981	7.00713	6.95544	7.01474	6.41062	6.98157	7.2947	6.87497	7.15068	6.5664	7.19202	7.4659	6.92935	7.57955
ABCB11	-1.88421	-1.62014	1.77386	-2.61073	-1.55416	-1.82271	4.20692	3.42793	10.1291	-1.96792	-0.7976	4.93638	2.43981	-0.586895	3.12906	-1.76771	0.206047	-0.601444	2.84257	2.72474	2.99202	-2.44891	2.67138	0.955666	4.84673	4.8702	4.98392	4.84976	4.87663	4.87429	5.07786	5.07057	5.42714	4.86251	4.90445	5.06413	4.99107	4.893	5.02759	4.87056	4.92521	4.89664	5.00591	5.00046	5.0303	4.849	5.01879	4.95511
ABCB4	-3.88202	-6.36899	-4.93286	-4.1579	-1.78733	-0.567624	1.90853	-4.07906	-3.76174	-10.8835	-1.98128	-1.06743	-0.194781	-4.94774	-7.03575	-4.92115	-4.75731	-4.63027	-1.26231	-1.30895	-1.30995	-2.83473	-3.64694	-5.19664	4.77707	4.71834	4.76503	4.79855	4.86895	4.90565	4.99859	4.78553	4.78197	4.54463	4.86891	4.88244	4.91019	4.75363	4.70625	4.77029	4.76353	4.76712	4.87634	4.86402	4.89091	4.83793	4.811	4.76385
ABCB5	-4.2731	0.284405	6.44147	-1.28722	-2.4753	-11.1082	-3.46713	-1.04646	-2.41165	2.42062	-0.107345	-6.16639	-2.78867	-3.45779	2.59949	-5.25499	-3.10668	-2.54576	-8.23146	-2.93996	0.879299	4.53149	-3.25349	-4.43946	4.76345	4.9311	5.13131	4.89324	4.84644	4.62168	4.81242	4.89667	4.83275	4.99328	4.92518	4.71766	4.8271	4.79763	5.01079	4.76025	4.8181	4.83495	4.65535	4.8082	4.96246	5.06768	4.82478	4.78897
ABCB6	232.801	236.27	208.616	218.794	241.901	306.741	155.862	139.738	53.1454	292.237	259.119	585.841	638.216	693.484	604.794	602.269	549.677	474.536	507.22	265.289	504.272	354.811	529.047	478.398	7.78826	7.81784	7.69164	7.80126	7.80275	7.78935	7.66023	7.77906	6.81198	8.07081	7.93408	9.05953	9.15398	9.31965	9.20361	9.15775	9.0356	8.85682	8.94466	8.46449	9.26586	8.51987	9.56521	8.89564
ABCB7	103.326	106.027	92.4642	112.898	106.202	172.611	80.2652	53.0805	43.5502	108.826	107.289	89.5572	117.447	98.7102	100.628	109.184	128.102	120.917	117.634	112.696	104.246	119.414	85.6948	121.014	6.767	6.81606	6.71337	6.96839	6.77685	7.01701	6.80889	6.59638	6.59945	6.81942	6.81566	6.56162	6.85277	6.6832	6.78577	6.78623	7.01549	7.0116	6.94308	7.30052	7.14916	7.05902	7.04337	7.0861
ABCB8	5.54154	8.15961	10.9341	11.6724	6.49504	9.02486	3.62181	6.21242	0.374555	2.17484	7.06403	16.4195	8.33536	5.59865	7.3687	13.0237	7.86805	6.93	6.38381	9.42318	9.50306	15.4092	7.183	9.42204	5.09608	5.1782	5.27113	5.30837	5.11697	5.12811	5.05772	5.17979	4.94308	4.98575	5.14163	5.35767	5.15921	5.0839	5.15223	5.27929	5.15233	5.13266	5.11234	5.22636	5.25315	5.39466	5.17664	5.20759
ABCB9	116.651	121.666	123.403	113.676	148.769	175.26	89.1016	84.1974	67.8722	117.146	181.628	186.846	186.958	177.458	163.539	157.749	147.08	165.08	169.866	136.642	218.817	160.323	185.362	258.043	6.91025	6.96623	7.03898	6.97575	7.18156	7.03988	6.93578	7.0986	7.10829	6.90381	7.46419	7.47288	7.47396	7.42806	7.39319	7.26595	7.21188	7.42259	7.43946	7.56124	8.12654	7.46055	8.09009	8.06913
ABCC1	27.0682	25.0294	24.6656	21.0097	35.4714	40.8559	31.2774	18.6112	10.3458	28.1992	26.3937	24.7625	25.8482	24.2351	16.2714	17.4488	22.4894	17.2962	18.5298	28.622	45.7582	37.3053	49.81	49.7175	5.6659	5.62666	5.65224	5.57118	5.82423	5.71331	5.94455	5.6941	5.43981	5.67757	5.64756	5.55112	5.58463	5.54536	5.38938	5.3868	5.51801	5.41589	5.43822	5.84682	6.21589	5.90699	6.41507	6.16028
ABCC10	90.3257	94.1759	83.9358	77.2447	98.6089	127.808	62.959	27.2708	17.1938	82.1356	89.9221	110.414	88.5057	88.7765	88.1166	86.5684	90.9883	80.8916	95.4511	90.9411	130.214	113.23	144.421	160.817	6.63183	6.68857	6.60983	6.56765	6.69853	6.66282	6.55232	5.97255	5.77937	6.53677	6.63441	6.79643	6.54803	6.57118	6.63145	6.52632	6.62247	6.54883	6.70365	7.01278	7.44033	6.99126	7.75572	7.44939
ABCC11	3.37805	3.80889	0.943382	-0.131662	2.72007	4.14467	-0.628499	2.55035	4.05394	-0.619797	-2.33783	-1.89318	-0.962547	3.21258	1.12906	-0.839998	0.027682	-1.74288	-0.899854	3.33538	3.83123	1.42991	-1.26339	-1.88446	5.02411	5.04087	4.95591	4.92989	5.00911	5.02122	4.91083	5.03643	5.09421	4.90385	4.85721	4.85621	4.88517	5.01269	4.96636	4.90055	4.92004	4.86084	4.88739	5.02083	5.05698	4.96846	4.88809	4.86525
ABCC12	0.968761	0.574696	4.67009	4.04936	4.95288	-1.94708	0.296814	3.28872	8.45027	3.92435	-0.757492	-1.05352	2.80149	5.87947	4.30518	-3.87623	-1.724	0.0689125	3.80721	6.7322	3.47348	2.31007	-0.861284	0.340568	4.94527	4.94038	5.07623	5.06462	5.07339	4.87149	4.94278	5.06468	5.33245	5.03945	4.9055	4.88305	5.00286	5.09135	5.06199	4.80315	4.86597	4.91834	5.03602	5.13798	5.04564	4.99755	4.90051	4.93643
ABCC13	2.04662	2.75214	6.41216	5.91176	-0.143645	9.74502	3.00293	1.03858	7.15873	1.58594	1.37818	3.36156	6.12026	8.9945	0.915577	5.21415	7.35207	2.57215	4.28553	1.29683	2.32066	1.84283	0.285414	0.214768	4.98062	5.0086	5.13039	5.12478	4.92177	5.14367	5.03568	4.97865	5.25602	4.9689	4.96939	5.01742	5.10152	5.17649	4.95997	5.07902	5.13674	4.99722	5.05082	4.95062	5.00785	4.98204	4.93829	4.93233
ABCC2	36.1247	30.2914	20.5494	22.3759	49.7837	232.03	190.198	318.572	238.075	56.1107	44.1324	105.547	97.1165	106.732	75.8331	103.016	90.8452	69.3008	95.1185	33.952	26.8559	60.7995	29.94	49.5225	5.85506	5.73648	5.55161	5.60405	6.07659	7.41687	7.90316	8.83274	8.63497	6.19095	6.00116	6.74366	6.6452	6.77745	6.47531	6.71634	6.62193	6.39006	6.70012	5.98327	5.78955	6.32845	5.94771	6.15762
ABCC3	1063.51	1030.92	1077.46	972.558	1256.67	1255.01	833.734	661.768	434.092	988.625	856.273	2436.12	2330.07	2604.02	2635.23	2565.62	2395.19	2386.98	2039.19	1766.99	909.87	1022.1	843.69	840.553	9.78426	9.75547	9.80143	9.76101	10.0121	9.70776	9.88765	9.76758	9.34558	9.70454	9.50429	11.178	11.0461	11.2722	11.3057	11.3179	11.2638	11.2139	11.073	11.2304	10.0729	10.0415	10.1975	9.66834
ABCC4	111.542	97.0984	98.5336	99.2406	94.5272	67.1723	23.1672	9.39225	3.64769	107.959	122.39	91.7898	96.2774	93.7076	52.3646	70.712	78.7113	63.2851	75.213	70.4871	127.138	120.016	115.261	185.589	6.85613	6.72034	6.77276	6.81781	6.65766	6.06964	5.72629	5.31601	5.07555	6.80866	6.96004	6.59006	6.63778	6.62914	6.13725	6.32774	6.47279	6.3143	6.45116	6.70326	7.40702	7.06533	7.46323	7.6461
ABCC5	113.618	112.077	104.558	97.4265	135.522	212.361	142.919	116.024	65.291	118.927	144.022	160.015	179.415	184.748	192.325	163.767	145.128	138.006	142.105	179.026	227.609	196.736	229.462	206.77	6.87588	6.87358	6.83524	6.79378	7.05333	7.2908	7.55511	7.54132	7.06533	6.92604	7.17202	7.26198	7.41795	7.4831	7.62012	7.31175	7.19772	7.19059	7.19202	7.9383	8.17299	7.7229	8.38344	7.78772
ABCC6	4.48784	2.8581	4.86086	2.86156	0.0646971	4.41461	0.852167	2.96845	6.01281	4.09494	2.36809	3.94932	3.73839	3.10152	3.42317	4.1741	3.81142	4.59114	3.93719	1.89635	2.85559	0.488214	0.905337	2.91642	5.06257	5.01219	5.08212	5.02494	4.92813	5.0275	4.9617	5.05267	5.1905	5.04497	4.99877	5.03466	5.03081	5.01061	5.03622	5.05074	5.03649	5.06126	5.03896	4.9723	5.02574	4.93974	4.95837	5.01419
ABCC6P1	2.60015	5.25088	-1.38486	1.22405	-1.75752	4.91079	10.51	4.92914	8.09858	3.19889	0.00038931	3.69769	8.46006	1.94542	3.13583	0.12478	2.31891	2.3707	4.27331	1.64337	0.42091	3.63642	3.65861	11.7299	4.99912	5.08618	4.88173	4.97252	4.87027	5.03817	5.30294	5.12824	5.31107	5.01847	4.9286	5.02764	5.16249	4.9731	5.02769	4.93009	4.99197	4.99127	5.05037	4.96383	4.947	5.03965	5.05382	5.27982
ABCC6P2	5.7905	7.97138	5.92487	7.0604	15.4196	13.325	14.7871	10.6423	5.11283	12.3882	13.7038	14.8353	25.4934	9.8801	2.52257	10.4729	5.41022	5.30836	0.766218	13.3375	8.23288	7.53504	6.19343	12.3653	5.10369	5.17128	5.11581	5.16186	5.36761	5.2173	5.45899	5.36694	5.1427	5.28922	5.33002	5.31709	5.57605	5.20101	5.00826	5.21518	5.08225	5.08296	4.9405	5.36945	5.21182	5.16367	5.14051	5.29989
ABCC8	-3.39126	-4.20613	-7.82809	1.62512	0.784753	-4.72867	-3.63582	-3.31545	-0.870569	-7.22861	-3.62406	-2.68953	-2.42784	-6.78331	-5.56212	0.905473	-1.59051	-1.45173	-6.32512	-2.19391	-6.04243	0.215881	1.75621	-0.885994	4.79463	4.78574	4.67121	4.98582	4.94994	4.79646	4.80634	4.81319	4.89293	4.69986	4.81671	4.83086	4.83825	4.69156	4.75756	4.95464	4.87119	4.87025	4.71115	4.83371	4.74071	4.93062	4.98687	4.89791
ABCC9	5.37872	2.36532	5.29734	1.11896	4.80933	9.08431	6.62569	12.1982	13.5587	2.63487	4.01825	4.79781	4.43867	4.6548	4.85882	2.76107	0.615224	0.523045	4.07034	3.61655	1.30104	3.81171	-2.28639	5.67722	5.09131	4.99663	5.09581	4.96899	5.06932	5.12968	5.16436	5.43552	5.60438	5.00027	5.05018	5.06004	5.05214	5.0556	5.07884	5.00964	4.93811	4.93349	5.04354	5.03047	4.97596	5.04486	4.85416	5.09841
ABCD1	22.985	33.0461	30.6885	23.9858	37.1388	40.5885	34.4989	25.5217	25.3992	43.366	26.224	38.3064	36.0215	33.7285	40.2707	41.0986	36.7729	26.4897	34.0329	19.9711	35.5853	38.8507	34.9303	33.5357	5.56704	5.7994	5.77975	5.64557	5.86777	5.7082	6.01668	5.91428	6.10003	5.98372	5.6446	5.81592	5.78471	5.74669	5.92073	5.87391	5.82363	5.63277	5.78319	5.59227	6.01042	5.93856	6.0791	5.84372
ABCD2	0.941951	-7.19211	-6.52939	-2.50884	-3.78858	-6.13787	-3.685	-4.90679	-1.15851	6.16379	0.621712	-2.74077	-4.13088	-2.63135	-2.84437	-0.318389	-2.58098	-0.668743	-0.995287	-1.43569	-1.62763	-2.77527	-0.586626	-3.3831	4.94434	4.69214	4.71021	4.85323	4.80541	4.75756	4.80473	4.75382	4.88144	5.10805	4.94672	4.82926	4.7848	4.82425	4.84339	4.91658	4.83667	4.89376	4.88437	4.85994	4.88059	4.83934	4.91002	4.82125
ABCD3	126.209	91.5975	88.186	112.647	87.0194	105.71	70.3736	68.2811	40.8947	111.448	130.64	80.5237	104.145	129.987	67.8384	114.249	85.9622	69.5838	80.829	60.9552	74.5557	115.38	93.6074	113.83	6.99996	6.65574	6.66003	6.96518	6.58144	6.47279	6.66141	6.86027	6.54293	6.84706	7.04222	6.4447	6.71906	7.00091	6.36931	6.8379	6.56046	6.39304	6.52506	6.54474	6.71457	7.01508	7.1667	7.00445
ABCD4	1.80672	1.60712	3.75537	2.54681	7.293	7.36958	2.63624	1.51472	4.83622	1.72438	2.31934	4.4401	4.24963	4.11203	2.97115	6.49817	-0.21682	7.63681	10.8492	8.52398	1.47282	5.69128	8.16616	2.44169	4.97307	4.97274	5.04674	5.01539	5.13918	5.09298	5.0239	4.99648	5.12915	4.97252	4.99722	5.04909	5.04684	5.0392	5.02385	5.11384	4.91181	5.15112	5.23399	5.19691	4.9816	5.10315	5.21347	4.99892
ABCE1	490.152	427.968	415.63	424.934	411.069	445.838	152.046	93.8144	52.0992	525.675	429.725	230.328	224.754	213.012	160.79	215.785	266.37	248.219	251.081	180.736	139.443	303.473	116.248	299.636	8.73864	8.57522	8.54454	8.65748	8.49477	8.27905	7.63402	7.2581	6.78209	8.86227	8.58042	7.76758	7.71529	7.67894	7.373	7.69199	8.02447	7.98959	7.96918	7.94825	7.53285	8.31124	7.47022	8.26996
ABCF1	1481.13	1328.1	1293.1	1251.48	1542.16	1750.93	898.061	565.308	524.452	1365.63	1390.66	865.13	1039.46	964.634	1079.52	1006.03	917.38	894.818	1010.32	722.779	770.334	1180.28	611.177	1140.81	10.2557	10.1299	10.0606	10.1271	10.3092	10.1595	9.97813	9.58001	9.56424	10.1782	10.2021	9.63081	9.85423	9.80143	10.054	9.94235	9.80936	9.76476	9.96847	9.91871	9.8686	10.282	9.76369	10.0704
ABCF2	129.598	154.163	143.354	120.926	126.445	150.721	66.882	45.7951	45.4456	130.242	125.954	91.6951	88.3134	74.7806	77.6336	82.5354	76.1094	72.45	81.4443	47.9074	54.4052	92.4666	39.7638	89.6843	7.02949	7.27584	7.21802	7.04688	6.96584	6.85235	6.60925	6.44166	6.6407	7.03843	6.99716	6.58956	6.54514	6.39694	6.5004	6.47925	6.44035	6.43375	6.5357	6.29998	6.38491	6.75811	6.19314	6.72761
ABCF3	71.5999	62.67	62.9346	51.2349	68.8882	108.41	81.6282	72.3302	53.3598	79.3503	86.8205	84.1943	72.9455	73.4388	88.0148	78.1544	75.0438	82.4496	81.6268	68.2052	65.0693	104.23	67.3992	66.922	6.41631	6.32214	6.3602	6.20842	6.35124	6.49424	6.82951	6.92424	6.81641	6.50485	6.59723	6.49253	6.35222	6.37879	6.62977	6.42746	6.42131	6.56928	6.53844	6.66686	6.56248	6.88937	6.73488	6.43496
ABCG1	12.7593	8.20522	9.73544	9.20701	12.0777	13.6066	9.38874	15.3988	8.97055	9.46213	15.1574	12.6495	13.4492	10.1574	10.1165	10.5265	16.8017	10.8118	9.27809	10.2856	8.52329	10.0862	11.9863	8.86221	5.30837	5.17939	5.23461	5.23006	5.2765	5.22239	5.26436	5.58033	5.36005	5.20767	5.3698	5.26491	5.29805	5.2075	5.22933	5.21686	5.38352	5.24383	5.19153	5.25811	5.22112	5.23791	5.352	5.19126
ABCG2	-1.18549	-7.84619	-3.21658	-2.28026	2.58094	-0.91721	-1.45402	-1.42423	0.631567	-4.15185	5.32479	3.15333	-2.67008	3.4114	-2.51997	2.43717	-1.50929	3.83779	-6.16275	2.36747	-4.82698	-1.52413	-0.188196	-0.275986	4.86986	4.67252	4.82234	4.86126	5.00446	4.89599	4.88095	4.88266	4.95231	4.79575	5.08835	5.0112	4.83077	5.01892	4.85389	5.00068	4.87382	5.03801	4.716	4.98799	4.77899	4.87826	4.92222	4.91699
ABCG4	9.92755	13.2466	16.8572	9.74185	17.0996	5.63906	7.01247	6.11387	3.75899	10.186	7.91314	11.2406	11.7223	9.08108	13.1639	10.137	14.9168	12.1235	15.6237	10.4289	10.7994	11.661	19.4688	13.3675	5.22763	5.32504	5.44088	5.24615	5.41199	5.05388	5.17745	5.17508	5.08044	5.22878	5.1659	5.23052	5.251	5.17989	5.3105	5.20726	5.33854	5.28025	5.35914	5.26305	5.29732	5.2873	5.62626	5.33031
ABCG5	5.50889	2.81508	-0.576485	8.18919	0.482927	9.20474	1.11177	8.6693	1.14771	5.93044	3.27208	0.014368	-0.708704	6.01207	0.195122	3.94196	6.9219	-2.1678	3.16097	2.86803	3.8841	5.28091	-0.961565	6.73618	5.09523	5.01057	4.90723	5.19651	4.94082	5.13291	4.97056	5.28565	4.97223	5.10157	5.02702	4.91562	4.89376	5.09531	4.93824	5.04314	5.12505	4.84789	5.01539	5.00545	5.05883	5.09044	4.89735	5.12982
ABCG8	2.39193	-3.14889	2.62529	5.90421	-1.89979	-2.24801	-0.0236052	0.593413	-0.467417	8.19199	-1.9331	-2.47518	3.02244	0.398388	1.58031	-0.383399	0.637543	2.47191	0.511434	6.21402	2.91251	3.86301	2.75355	5.69001	4.99197	4.81999	5.01079	5.12448	4.86508	4.86408	4.93215	4.96099	4.90921	5.16948	4.87027	4.83763	5.00967	4.92537	4.97988	4.91483	4.9389	4.99441	4.93218	5.11853	5.02764	5.04659	5.02167	5.09886
ABHD1	0.940166	1.26672	-2.98648	2.37231	-0.51042	1.14508	-1.71729	1.60093	1.77276	-5.30552	2.00887	3.24352	5.1831	0.177792	-1.52177	2.77779	0.54483	-2.22264	-5.2065	1.69203	0.696201	3.67027	0.621336	0.493378	4.94426	4.96295	4.83014	5.00972	4.91002	4.94924	4.87104	5.00046	4.99543	4.76066	4.98723	5.01423	5.07455	4.91757	4.88451	5.01023	4.93572	4.84572	4.7487	4.96549	4.95627	5.04052	4.94935	4.94157
ABHD10	135.826	142.869	136.576	135.309	116.403	151.175	64.6516	48.6301	21.524	162.702	195.729	144.209	157.606	156.533	160.518	161.14	147.191	131.913	118.037	92.5909	98.4191	136.494	77.8441	135.654	7.0837	7.16992	7.15718	7.191	6.87613	6.85511	6.57922	6.50784	5.96275	7.32132	7.568	7.12376	7.23248	7.25476	7.36989	7.29233	7.21291	7.13278	6.94757	7.03669	7.07267	7.23689	6.91973	7.22766
ABHD11	85.7455	102.067	102.72	94.2352	89.1167	78.7833	35.0976	25.6313	18.0508	71.9058	60.4389	50.0754	48.2115	48.057	44.169	41.636	39.0682	43.0883	43.2108	22.4201	26.16	36.8267	18.3209	33.637	6.58019	6.77054	6.81781	6.75654	6.6002	6.19945	6.0307	5.9165	5.821	6.40986	6.25788	6.02114	5.99974	6.00207	5.99833	5.88321	5.86943	5.9701	5.96247	5.66554	5.77144	5.90042	5.58344	5.84616
ABHD12	242.684	271.254	258.323	246.616	278.744	348.725	203.427	158.571	148.333	263.081	252.993	299.24	291.389	285.592	249.627	258.296	263.722	237.063	228.655	157.093	231.97	250.845	204.485	312.219	7.84366	7.98738	7.95221	7.94825	7.98959	7.95172	7.9948	7.93638	8.05821	7.94551	7.90543	8.11628	8.0673	8.08574	7.97747	7.94869	8.01401	7.9173	7.83816	7.76886	8.19951	8.0496	8.22644	8.32533
ABHD12B	4.67325	2.89411	2.99585	0.443239	1.85552	1.84892	1.90833	0.548743	3.82799	1.20987	2.92535	0.85382	0.589002	5.16584	1.35868	-0.0727885	-0.287407	3.31527	2.64862	2.2493	1.77151	4.45376	0.348402	2.6095	5.06993	5.01308	5.02208	4.94835	4.98188	4.96706	4.99855	4.95921	5.08409	4.9578	5.0163	4.94184	4.93342	5.07071	4.97343	4.92457	4.90964	5.02163	5.00018	4.98389	4.99156	5.06456	4.94047	5.00404
ABHD13	3.48595	4.13794	1.87682	7.04	-1.22281	1.39835	3.31804	-0.882963	1.46954	5.05036	6.54764	2.65391	3.45516	6.12865	2.55085	5.55272	2.9561	3.51837	4.87523	1.93994	3.52374	2.01394	4.23541	6.49911	5.02769	5.05139	4.9877	5.16144	4.88702	4.95561	5.04631	4.90255	4.98434	5.07451	5.12649	4.99703	5.02225	5.09882	5.00901	5.0893	5.01162	5.02802	5.06857	4.97374	5.04741	4.98776	5.07382	5.12301
ABHD14A	127.04	134.096	162.28	110.999	117.161	130.703	78.2734	37.3667	32.2871	123.294	131.924	130.883	103.285	117.716	98.3269	75.7616	109.017	111.656	113.86	68.8011	96.0696	86.3482	81.1235	176.058	7.00713	7.09033	7.38035	6.95141	6.88228	6.68811	6.78577	6.24674	6.3049	6.97048	7.05839	6.99199	6.71171	6.88659	6.76186	6.39627	6.82831	6.91152	6.90863	6.67698	7.04085	6.68892	6.97575	7.58086
ABHD14B	55.7259	58.6384	58.9	39.4304	54.5132	65.0526	27.8681	14.2927	19.1017	57.9794	41.9372	60.9418	67.9986	70.8616	78.7476	59.376	71.7677	71.2515	55.3167	46.8609	43.8169	55.7972	51.8429	44.2355	6.20013	6.25438	6.30754	5.98888	6.15396	6.04674	5.85544	5.53141	5.86978	6.2175	5.96785	6.19503	6.28624	6.3484	6.51418	6.16206	6.37668	6.41422	6.16028	6.28166	6.17964	6.25416	6.44963	6.0593
ABHD15	69.4739	60.7441	65.6398	64.6581	68.2023	70.2296	40.1262	39.5986	34.8855	68.7418	70.8446	100.014	85.5937	91.0167	62.0033	64.2537	81.8496	50.2797	53.1206	45.5884	61.9283	75.4863	46.1509	110.696	6.38885	6.2927	6.39304	6.41464	6.33816	6.10301	6.13593	6.29771	6.37812	6.37265	6.39431	6.68176	6.51385	6.59429	6.28851	6.23604	6.51067	6.10227	6.12544	6.24774	6.51346	6.54069	6.33541	6.97142
ABHD2	46.4505	50.8244	46.3437	41.4193	51.2266	73.4271	66.3088	55.3737	43.401	35.6775	50.3539	64.0376	57.1421	50.8388	43.8159	33.6208	57.1607	47.8307	37.1752	34.5567	39.6446	48.5575	36.5853	65.68	6.0493	6.13379	6.10401	6.02479	6.09976	6.13989	6.60071	6.63598	6.59638	5.83494	6.10253	6.24297	6.13464	6.0415	5.99186	5.73753	6.16796	6.05891	5.84616	5.99833	6.09146	6.13102	6.11619	6.41631
ABHD3	190.498	214.639	170.751	167.626	142.337	543.751	554.719	536.104	248.758	165.301	212.198	358.458	305.643	311.663	144.15	222.586	287.225	212.185	190.75	88.1025	154.772	133.061	117.088	238.39	7.52368	7.70272	7.44873	7.45405	7.11838	8.5367	9.30682	9.50073	8.68817	7.33752	7.6712	8.36152	8.13266	8.20811	7.2346	7.73815	8.13624	7.7631	7.59491	6.97695	7.67693	7.19613	7.47888	7.97463
ABHD4	29.84	35.9079	27.447	32.2061	37.8299	74.2706	71.6778	129.539	144.407	46.9329	41.0322	299.435	277.632	276.466	284.495	293.716	225.403	215.562	155.119	50.1204	51.572	37.3099	51.9751	49.6428	5.72385	5.85148	5.71562	5.83287	5.8785	6.14846	6.68279	7.68105	8.02357	6.04863	5.95072	8.11825	8.00231	8.03603	8.1597	8.13944	7.78685	7.78826	7.31962	6.3424	6.32988	5.90721	6.45186	6.15918
ABHD5	53.1087	60.5388	66.0528	45.4707	55.929	131.44	77.5382	113.764	238.869	64.1253	64.5471	73.0127	89.9671	71.9773	62.2646	74.7515	72.2751	82.9863	69.9543	25.4898	38.2738	49.0529	24.6353	45.5947	6.16484	6.28813	6.39917	6.10301	6.1733	6.69461	6.77649	7.51334	8.63931	6.30641	6.31262	6.35156	6.56683	6.36266	6.2927	6.37879	6.38491	6.57646	6.3798	5.76564	6.06652	6.13864	5.79619	6.08551
ABHD6	167.214	192.343	183.297	157.26	207.48	173.037	88.695	52.6358	25.5061	163.725	159.381	144.614	127.403	173.627	139.374	137.249	131.637	109.522	126.719	131.654	137.815	162.589	109.465	280.228	7.35341	7.5617	7.53285	7.37505	7.59806	7.02196	6.9289	6.58702	6.10436	7.3291	7.28999	7.1279	6.96221	7.39277	7.19337	7.0761	7.05433	6.88347	7.04031	7.51467	7.51507	7.47931	7.39605	8.17592
ABHD7	24.2465	15.3087	31.6397	19.0527	18.9389	20.9918	15.4097	8.65117	9.41418	22.4606	19.5416	30.4395	39.4656	24.4353	10.4992	26.8228	37.6973	25.5668	24.5409	16.4797	5.78916	20.7109	9.19787	31.5144	5.59631	5.38299	5.80445	5.52441	5.4543	5.37004	5.48323	5.28429	5.38466	5.54823	5.48428	5.6687	5.85183	5.55056	5.24014	5.58672	5.83995	5.60939	5.58134	5.4722	5.12424	5.5373	5.25402	5.80209
ABHD8	75.4236	94.6758	89.2478	81.4783	86.9754	88.8319	56.0816	52.1575	64.3546	68.3829	78.269	205.989	231.231	248.889	263.391	226.854	224.456	233.518	236.93	88.8054	92.6983	90.2699	83.2755	97.6215	6.46405	6.6915	6.67629	6.61811	6.58019	6.31241	6.43317	6.57509	7.04183	6.36655	6.49558	7.61521	7.76139	7.89121	8.04914	7.76502	7.77941	7.89802	7.88793	6.98658	6.98612	6.73909	7.00613	6.81902
ABHD9	3.85312	4.63244	7.21795	6.48611	6.67745	8.7106	7.53879	4.98469	8.27206	9.32913	9.07222	10.4737	-2.48161	11.5053	2.53958	3.19597	11.566	4.01374	0.994504	0.268275	5.14392	2.88394	5.17541	3.61476	5.04024	5.06702	5.15565	5.14405	5.1227	5.12239	5.19719	5.13024	5.32095	5.20322	5.20175	5.21527	4.83682	5.2424	5.00872	5.02289	5.2469	5.04386	4.94748	4.91663	5.10065	5.01471	5.10699	5.03488
ABI1	62.0071	58.9564	69.613	61.8703	74.6031	130.021	44.9559	39.3563	32.1303	75.439	61.7349	61.6127	67.5427	64.5563	57.4597	65.7971	75.9535	60.087	61.7663	51.6488	50.7869	55.2007	49.4387	54.1904	6.28624	6.25976	6.43816	6.37692	6.42397	6.6832	6.23251	6.29354	6.30023	6.45263	6.2763	6.20555	6.28188	6.26091	6.22172	6.25811	6.43663	6.26663	6.26054	6.37516	6.31262	6.2445	6.40903	6.23422
ABI2	42.9231	38.5254	55.7912	39.6726	44.2743	62.0389	32.4348	18.7859	17.3873	57.8915	49.2257	56.6987	63.2657	45.3507	46.2904	52.2873	53.0862	47.1501	46.8372	34.9924	35.5876	47.0877	46.5315	46.5734	5.98568	5.90826	6.267	5.99406	5.98352	6.01279	5.97093	5.70113	5.78859	6.21526	6.08615	6.1302	6.22761	5.95805	6.0411	6.05099	6.10853	6.04598	6.02077	6.00703	6.01072	6.10559	6.34357	6.10436
ABI3	5.5702	0.32201	0.516494	-1.1744	3.81795	11.5533	0.502487	0.494261	-0.254793	-2.93185	0.659203	-4.59729	4.03593	2.20854	1.09081	-0.0113744	-2.01588	0.360516	2.52825	2.56143	0.639698	3.5114	-1.89392	4.75906	5.0968	4.9323	4.94175	4.89677	5.04048	5.17929	4.94994	4.95744	4.91663	4.83275	4.94786	4.76728	5.04024	4.98111	4.96513	4.92668	4.85656	4.9276	4.99691	4.99494	4.95421	5.03511	4.86739	5.06867
ABI3BP	5.82561	13.9777	8.37766	9.44824	3.97339	30.2092	22.0532	4.6531	7.87418	9.91344	14.555	14.276	21.9747	20.8539	7.20297	13.7848	12.6647	16.3445	4.66916	9.98721	12.4088	10.0668	8.27859	13.6969	5.10505	5.34935	5.19084	5.2373	5.04513	5.53965	5.69922	5.11591	5.29764	5.22137	5.35254	5.30665	5.49522	5.47041	5.14774	5.29667	5.27808	5.38957	5.06272	5.24808	5.34897	5.23748	5.21795	5.34186
ABL1	123.482	138.271	111.998	126.458	154.904	172.108	110.373	104.729	123.131	121.377	130.823	124.386	140.101	135.398	146.915	146.732	134.695	129.166	124.898	93.2703	90.2463	109.43	76.8839	107.376	6.9741	7.12835	6.91592	7.10829	7.23284	7.01305	7.21137	7.4056	7.8323	6.94958	7.0447	6.93699	7.07361	7.04825	7.25641	7.15659	7.09076	7.10275	7.01781	7.0444	6.95141	6.9467	6.89951	6.9337
ABL2	74.5539	78.1671	56.3536	95.921	174.853	471.387	267.14	231.051	370.393	30.9302	48.1554	43.8827	40.1659	44.2283	40.8156	138.627	46.4178	38.8664	42.0019	44.7805	20.5735	84.1784	21.7152	31.4873	6.45295	6.51418	6.2736	6.77685	7.38888	8.35303	8.34836	8.42336	9.17301	5.73785	6.0677	5.91382	5.86749	5.94207	5.93179	7.08732	5.99406	5.89049	5.9383	6.22865	5.60683	6.66141	5.70113	5.8018
ABLIM1	444.239	448.295	391.958	324.49	326.53	341.815	181.741	115.748	67.8264	421.183	270.963	172.061	158.685	166.842	187.576	187.919	184.066	211.253	230.856	170.2	122.359	188.981	101.755	159.731	8.61177	8.63574	8.46763	8.30896	8.19747	7.92624	7.85353	7.53879	7.1068	8.57385	7.98076	7.36154	7.24216	7.33365	7.58242	7.51507	7.51758	7.75844	7.85199	7.87772	7.35258	7.67505	7.29508	7.44033
ABLIM2	17.3094	10.1345	7.52344	10.7094	7.76724	12.9109	-0.126648	9.99192	9.92224	11.6838	2.60363	13.9551	15.3497	12.664	13.2449	7.40638	14.2678	13.1408	-0.0109735	4.00991	3.18798	2.49282	2.33793	7.59863	5.43265	5.23564	5.16462	5.27442	5.15585	5.20767	4.92894	5.34125	5.41688	5.27191	5.00724	5.29764	5.34326	5.27085	5.31319	5.13806	5.32169	5.30737	4.91557	5.04486	5.03663	5.00347	5.00602	5.15414
ABLIM3	8.98574	10.775	1.8356	6.55219	9.30352	-1.20877	2.68037	6.76317	8.46885	1.36292	-0.530197	12.3805	10.3263	17.9573	20.445	11.4577	18.4044	20.5695	8.83764	2.89963	-1.13214	5.95744	0.895483	-4.18037	5.20058	5.2557	4.98627	5.14657	5.20058	4.88943	5.02524	5.20223	5.3331	4.9623	4.91178	5.2576	5.21135	5.40619	5.49087	5.24113	5.42478	5.49282	5.17954	5.00659	4.89692	5.11226	4.95803	4.79639
ABO	-6.58166	1.98073	-5.01504	-3.68361	-6.87012	-3.50169	-3.03707	-5.87328	0.379057	2.76788	3.84268	-0.0634976	-6.00873	-7.87576	0.548714	-2.39101	2.63433	-2.04287	0.198263	-0.900762	-1.56277	-1.94862	-1.61021	-3.93771	4.68357	4.98502	4.76282	4.81462	4.71268	4.8309	4.82712	4.72032	4.94322	5.00495	5.04549	4.91368	4.72072	4.65475	4.94881	4.85109	5.00175	4.85151	4.92214	4.87823	4.88285	4.86464	4.87753	4.80405
ABP1	98.5217	93.0967	83.5278	75.1193	93.0225	107.845	53.3438	33.0728	21.1522	78.7705	78.9189	34.8135	36.5988	38.5197	32.2856	33.7448	24.2393	22.2189	30.92	27.8907	59.9948	51.8007	43.5769	59.7539	6.71951	6.67434	6.60384	6.54117	6.6452	6.48914	6.38197	6.14457	5.94659	6.49639	6.50305	5.74973	5.79399	5.83652	5.76505	5.73964	5.55749	5.53121	5.72104	5.82623	6.47602	6.18831	6.27838	6.31929
ABR	282.825	286.561	283.449	273.657	259.054	279.241	138.74	108.436	80.2143	218.043	230.775	224.067	268.139	267.845	228.377	259.396	225.843	226.963	246.756	166.144	136.593	239.977	103.32	175.766	8.02909	8.06201	8.06639	8.07601	7.88916	7.67166	7.51706	7.45286	7.32363	7.71383	7.78375	7.73815	7.95221	7.98792	7.84885	7.95804	7.78988	7.84927	7.94354	7.84415	7.50387	7.98291	7.31906	7.57843
ABRA	-0.816067	-4.13881	-2.94263	-2.4571	-5.05765	11.2366	-2.04244	-4.61384	1.24351	-0.638001	-0.452202	-3.4643	-4.87706	-4.09373	-4.7202	-7.85615	-3.60777	-5.00491	3.05319	-2.30433	0.199154	-1.04861	-1.90742	-2.23734	4.88356	4.78804	4.83186	4.85546	4.76547	5.17349	4.86057	4.76418	4.97596	4.90321	4.91445	4.80523	4.75823	4.77943	4.78307	4.67303	4.80008	4.75339	5.0121	4.83032	4.93939	4.89244	4.86673	4.85588
ABT1	44.2639	36.9204	35.369	36.1511	45.3704	37.3793	23.3441	25.2279	15.8816	40.7031	24.1161	56.0139	23.8565	34.9818	40.453	31.7974	36.1191	26.4105	25.1177	8.23263	12.6399	28.5714	12.1513	24.2065	6.00953	5.87776	5.89161	5.91809	6.00207	5.66457	5.73481	5.9059	5.71714	5.93616	5.5999	6.12042	5.5373	5.76817	5.92524	5.69742	5.80812	5.63057	5.59584	5.18651	5.35575	5.72195	5.35853	5.63149
ABTB1	33.1761	29.5841	25.8686	31.4302	31.9605	76.0609	58.2199	41.7303	35.4476	25.1432	18.235	87.5526	98.5296	77.5266	85.9016	79.198	89.4226	63.3088	63.1805	29.0948	18.7073	15.884	20.9165	8.28299	5.7994	5.72385	5.67605	5.81627	5.74991	6.16796	6.47246	6.34543	6.39403	5.61558	5.44887	6.53772	6.65797	6.42746	6.60152	6.44248	6.60384	6.31531	6.28255	5.85859	5.55313	5.40815	5.67448	5.1746
ABTB2	36.5035	37.3522	17.1212	26.952	40.2897	257.2	190.687	179.781	170.819	27.297	34.0523	37.1903	32.9918	17.6111	45.0585	43.9446	38.6196	40.7183	43.7941	25.2766	20.6413	43.7836	24.5634	26.9639	5.86425	5.88494	5.44833	5.71512	5.92106	7.56387	7.90797	8.0809	8.22193	5.65645	5.81316	5.79723	5.72578	5.39742	6.01816	5.92816	5.85973	5.92738	5.97093	5.76035	5.60961	6.03714	5.79323	5.69742
ACAA1	469.64	479.964	504.866	425.897	408.922	580.884	344.057	342.715	289.073	450.686	407.626	342.454	317.333	292.917	307.835	283.709	285.885	293.187	292.94	272.129	300.847	359.728	258.319	347.246	8.68505	8.72777	8.79275	8.66044	8.48894	8.61976	8.69308	8.92279	8.87766	8.65329	8.51366	8.30009	8.18522	8.12273	8.26042	8.08435	8.13223	8.20874	8.17633	8.49563	8.54592	8.53724	8.55098	8.45987
ACAA2	67.1664	65.7561	84.8914	62.7297	61.8484	91.8147	43.2787	48.846	63.1316	68.409	38.1902	86.8819	88.805	66.8365	66.9	86.1377	79.5804	79.2203	88.4369	38.996	26.0309	39.6845	14.2072	32.4635	6.36147	6.36179	6.62149	6.38738	6.25263	6.34432	6.19503	6.51203	7.02154	6.36755	5.8913	6.53138	6.55193	6.29715	6.35839	6.51835	6.48273	6.52847	6.6253	6.10986	5.76616	5.95534	5.4293	5.82047
ACACA	335.534	334.555	295.928	282.001	305.12	258.821	142.335	107.071	51.1166	268.244	259.108	284.773	320.27	298.344	282.015	300.901	266.692	189.895	219.377	216.678	373.634	288.677	335.414	348.791	8.24942	8.25826	8.11676	8.11123	8.10736	7.57057	7.5504	7.43132	6.75851	7.96718	7.93369	8.05313	8.19838	8.14918	8.14762	8.16729	8.02729	7.60723	7.77526	8.18959	8.85868	8.23093	8.93244	8.46646
ACACB	15.6817	14.4437	12.772	9.15482	18.2451	19.6875	15.4829	9.18508	12.3556	22.5258	23.9629	60.6728	47.9221	49.3453	72.784	66.1336	37.7779	39.3203	32.1446	43.056	63.7948	33.5042	64.6316	38.9267	5.39153	5.36056	5.32611	5.22822	5.43664	5.34425	5.48594	5.30694	5.5464	5.54988	5.59678	6.19235	5.99566	6.02038	6.43126	6.26233	5.84135	5.90042	5.74943	6.19503	6.53898	5.83837	6.6832	5.95337
ACAD10	90.0815	77.0902	76.8763	72.7616	84.9247	132.36	88.9342	34.9918	15.7946	80.6513	96.4299	138.709	139.586	110.63	152.922	123.696	130.518	76.9791	125.033	84.4341	100.688	114.357	124.911	118.229	6.62877	6.50139	6.53205	6.51627	6.55152	6.70427	6.93324	6.19627	5.71077	6.51627	6.70528	7.07212	7.06806	6.81781	7.30224	6.94103	7.04337	6.496	7.01953	6.93138	7.10518	7.003	7.56235	7.05647
ACAD11	182.167	133.775	124.493	129.642	143.261	286.29	154.957	105.913	56.9076	160.214	217.783	247.419	310.422	294.293	281.166	263.575	278.475	288.454	314.131	312.08	329.878	340.15	313.058	302.3	7.46365	7.08535	7.04802	7.1359	7.12865	7.70272	7.65282	7.41901	6.88691	7.29997	7.70911	7.87134	8.1549	8.12968	8.14355	7.98331	8.09334	8.18409	8.27569	8.70109	8.68022	8.46994	8.83079	8.28248
ACAD8	99.9356	92.4778	86.4947	74.4232	84.0302	140.676	65.1037	57.1351	18.2658	128.424	113.08	113.132	113.148	109.787	103.945	96.3165	92.6563	83.3167	89.6648	99.1054	90.0667	90.6316	69.1647	94.5636	6.73488	6.66522	6.64031	6.53168	6.54238	6.76942	6.58664	6.66924	5.83161	7.02022	6.87692	6.82346	6.80716	6.81068	6.81606	6.63778	6.64276	6.58241	6.64323	7.12941	6.94829	6.74207	6.76447	6.78517
ACAD9	433.224	476.293	545.766	455.663	460.805	536.09	289.318	150.408	96.041	486.49	492.524	384.506	475.783	437.065	362.463	366.214	363.723	339.822	369.192	319.193	345.079	365.241	314.624	368.253	8.58136	8.71839	8.89203	8.7453	8.63804	8.51609	8.44536	7.8708	7.54566	8.75299	8.7691	8.4605	8.72721	8.66488	8.4729	8.43277	8.46763	8.39892	8.50468	8.73864	8.7453	8.55737	8.83901	8.5367
ACADL	-2.8282	3.12636	-6.71849	-2.97373	2.99523	5.05897	-1.03833	0.796317	-3.38352	-3.57794	-0.0616453	-2.68798	-2.26559	3.23957	-5.05009	-7.11101	6.68523	-2.06321	0.805219	-3.69336	-3.8761	-0.58928	1.38043	-0.812675	4.81521	5.0191	4.70333	4.83734	5.01754	5.04101	4.89599	4.96942	4.79693	4.81207	4.92648	4.831	4.84398	5.01377	4.77435	4.70063	5.11697	4.85103	4.94183	4.78228	4.80816	4.90642	4.97419	4.90075
ACADM	241.528	211.152	243.887	250.491	206.406	288.669	123.518	95.6704	73.1107	230.65	260.245	194.004	223.893	228.613	160.071	214.499	198.317	198.225	197.815	125.858	144.387	170.369	122.126	171.435	7.83707	7.68322	7.88086	7.96918	7.5915	7.71109	7.36486	7.28337	7.20262	7.77941	7.93723	7.5298	7.71067	7.78102	7.36377	7.68225	7.62064	7.6598	7.6391	7.45286	7.57891	7.54456	7.53475	7.54353
ACADS	33.1714	36.8123	30.7146	26.6863	36.2056	56.5533	29.7932	17.1443	11.9906	32.3956	25.7632	42.0902	40.6805	41.8247	47.5719	32.8957	25.6075	34.9642	34.8977	24.7134	28.9822	24.9258	29.4274	24.1749	5.7991	5.87573	5.78035	5.7095	5.84189	5.94707	5.9059	5.64733	5.52935	5.76535	5.63588	5.88074	5.87545	5.90473	6.06179	5.72306	5.59107	5.81592	5.80085	5.74067	5.85033	5.63882	5.93141	5.63024
ACADSB	7.92965	4.47498	8.28493	7.1124	2.69845	3.10345	-2.90446	7.98616	1.69024	-1.60596	-2.33898	0.972719	4.36355	8.63702	3.24267	8.41167	0.6222	6.30604	7.10326	8.39307	4.41345	2.60289	0.939848	-0.892296	5.17	5.06191	5.18829	5.16358	5.00826	4.99742	4.83074	5.25629	4.99237	4.87304	4.85716	4.94586	5.05	5.16741	5.03092	5.1659	4.93848	5.11401	5.13016	5.19153	5.07586	5.00664	4.95967	4.89767
ACADVL	929.268	833.159	821.343	977.548	1112.27	1421.52	983.305	773.218	376.214	853.12	1048.84	1070.06	1126.37	1176.9	1126.79	1169.11	1036.62	924.279	1066.5	919.228	1093.1	1336.91	999.069	868.216	9.59704	9.45766	9.42484	9.77391	9.84339	9.87341	10.0973	9.9955	9.19051	9.51087	9.79898	9.94428	9.98967	10.1167	10.121	10.181	9.99784	9.823	10.0552	10.2755	10.3195	10.4711	10.4408	9.71739
ACAN	-1.5042	-7.15315	-0.96872	-3.8314	-2.03124	-9.81022	-3.53636	-7.46936	-4.66252	-3.73132	0.29995	-7.65391	2.0131	-0.932987	-4.68373	-7.49357	-5.92934	-8.21881	-5.72138	-4.67404	-4.21834	-3.37592	0.969778	-4.76819	4.85886	4.69324	4.89462	4.81024	4.86014	4.66422	4.81001	4.66626	4.74619	4.80737	4.93771	4.6673	4.97797	4.88125	4.7844	4.68481	4.72796	4.64532	4.73103	4.74547	4.79664	4.82092	4.96095	4.77715
ACAP1	-1.87782	-5.16609	0.598594	1.55119	-3.87807	-0.847928	3.92376	-2.6283	2.44538	-3.73356	2.86233	0.312967	-4.71247	2.41571	1.17938	-2.28068	-4.29172	-3.02438	-0.226168	0.35673	-2.07247	0.137207	-1.26039	-0.458534	4.84699	4.75504	4.9442	4.98351	4.80279	4.89813	5.0683	4.83844	5.02411	4.80727	5.01479	4.92479	4.76427	4.98746	4.96835	4.85424	4.77773	4.81832	4.90852	4.91942	4.8668	4.92813	4.88829	4.9112
ACAP2	63.3712	44.9362	50.2929	54.7408	36.4026	68.4707	51.6169	62.8069	32.33	55.0969	51.2139	79.8986	59.6477	61.6893	34.9481	74.5436	50.7822	44.1217	38.9231	28.6244	20.8201	50.1476	23.1339	30.3069	6.30545	6.03143	6.17265	6.26478	5.84651	6.08198	6.35124	6.76405	6.30681	6.17716	6.11464	6.43571	6.17226	6.21876	5.82516	6.37435	6.06796	5.9925	5.88213	5.84711	5.61579	6.15509	5.74943	5.7717
ACAP3	4.79905	4.28596	4.53098	2.00477	2.03768	6.28376	-1.67416	-1.07652	-0.516176	2.20979	3.61063	1.76596	-4.12626	2.69002	6.33807	-1.08838	8.22272	-3.95914	7.06646	2.6687	8.6865	9.03492	5.08329	5.32659	5.07349	5.05565	5.0722	4.99734	4.98817	5.06838	4.87275	4.89542	4.90746	4.98709	5.03795	4.9707	4.785	4.99603	5.12382	4.8926	5.16332	4.78721	5.12907	4.99826	5.22704	5.20525	5.10335	5.08728
ACAT1	586.2	599.592	751.257	546.327	593.496	692.784	337.211	335.269	259.351	583.927	546.048	571.31	656.357	671.195	577.955	574.469	611.008	566.989	558.323	334.424	461.414	477.8	278.188	577.47	8.97098	9.0242	9.30682	8.98172	8.98532	8.85682	8.66336	8.89019	8.74133	8.99826	8.89802	9.0272	9.198	9.27299	9.13684	9.07959	9.19996	9.11381	9.0915	8.79704	9.14359	8.93178	8.65329	9.12769
ACAT2	227.517	251.568	242.743	229.768	248.404	301.118	123.251	84.786	100.309	247.437	305.425	451.333	381.491	377.053	364.99	292.374	311.831	285.692	234.055	110.755	212.704	169.531	141.697	259.873	7.75392	7.8935	7.87438	7.86073	7.83328	7.76645	7.36185	7.10611	7.5985	7.86073	8.13681	8.69489	8.43643	8.45676	8.48026	8.13223	8.24258	8.17239	7.86668	7.27784	8.09182	7.53672	7.72392	8.08005
ACBD3	389.629	372.384	339.455	328.908	320.833	515.472	336.132	460.062	367.123	327.931	354.538	376.541	347.849	382.833	384.457	423.046	456.944	412.43	397.556	249.503	153.641	173.136	124.059	206.348	8.45354	8.3941	8.29115	8.32592	8.16979	8.47097	8.65572	9.30682	9.16121	8.22425	8.34378	8.42814	8.308	8.48398	8.54826	8.64297	8.77178	8.66488	8.61448	8.37851	7.66693	7.56904	7.55459	7.78327
ACBD4	0.344867	3.10997	11.7823	-0.269721	4.00929	6.08977	4.60231	-0.532937	7.61658	5.22682	4.35034	10.1249	24.6875	19.9498	15.8569	13.6907	3.80337	19.5821	12.8367	19.6631	19.3521	13.7691	21.827	12.127	4.92341	5.01875	5.2978	4.92532	5.04611	5.06356	5.09255	4.91626	5.28505	5.08068	5.06015	5.20664	5.55579	5.45129	5.37809	5.29454	5.03636	5.46913	5.28552	5.58112	5.57019	5.34783	5.706	5.29145
ACBD5	5.07561	5.0995	2.52514	2.24844	6.35263	1.60891	1.27719	1.30327	3.17497	0.408622	5.32026	3.2338	3.41311	3.42889	3.1005	3.70226	1.54074	-2.17892	0.972094	0.85699	-1.11251	-1.1677	2.28445	0.419904	5.08205	5.08174	5.00797	5.00559	5.11318	4.96084	4.97623	4.98851	5.05488	4.93383	5.08808	5.01387	5.02092	5.01918	5.0267	5.03708	4.96781	4.84741	4.94677	4.93584	4.89753	4.88878	5.00414	4.93919
ACBD6	153.636	144.773	153.772	129.088	144.615	198.037	85.3995	60.1748	34.1911	135.134	130.229	137.833	146.883	146.975	133.022	128.754	131.318	138.197	148.793	78.8651	77.3796	123.387	83.327	113.151	7.24467	7.18571	7.30825	7.12905	7.14122	7.18957	6.88691	6.72998	6.3645	7.09076	7.03843	7.06336	7.13552	7.16632	7.12716	6.99372	7.05141	7.19257	7.25767	6.84492	6.7573	7.10398	7.00713	6.9947
ACBD7	-1.50826	-0.922592	-0.406704	-2.6794	-0.780329	-1.49855	-2.7724	2.24384	3.1234	-0.810578	-2.75044	-1.82849	5.33174	2.76946	-0.0721049	-3.03257	0.65358	2.8887	-2.01661	-0.650945	2.62112	-2.19935	-3.10339	0.212688	4.85859	4.89193	4.91277	4.84664	4.90059	4.88278	4.83597	5.02449	5.05232	4.8978	4.84424	4.85809	5.07896	4.99917	4.9302	4.83038	4.93964	5.00742	4.85134	4.88684	5.01782	4.85634	4.82949	4.93215
ACCN1	5.64366	13.4153	5.77506	4.23303	-0.561537	5.98936	5.63434	-5.41375	1.20926	5.58276	1.44564	-1.82692	0.880598	2.31381	0.802315	3.2213	-1.33215	-1.62098	-1.09782	7.82378	2.3443	-3.63627	0.615629	-1.71573	5.09886	5.33016	5.11045	5.0704	4.90788	5.06175	5.12747	4.73582	4.97452	5.09188	4.97116	4.85826	4.94287	4.98472	4.95684	5.02358	4.87906	4.86468	4.88092	5.17308	5.00876	4.81295	4.94924	4.87126
ACCN2	15.2397	19.6542	17.7215	22.8781	14.2635	9.66159	4.48311	0.518824	8.18302	18.7004	18.9246	8.91582	12.621	22.2012	17.2596	7.52699	8.27509	9.25348	15.4205	30.6714	37.5042	25.8734	36.6066	34.9619	5.37926	5.49507	5.46812	5.61483	5.33741	5.14191	5.08835	4.95815	5.31552	5.45326	5.46872	5.1746	5.2765	5.49666	5.4115	5.14254	5.16552	5.19805	5.35277	5.89925	6.05163	5.66375	6.11654	5.87603
ACCN3	1.35771	2.56739	2.8392	-0.863356	-0.783957	1.41583	-1.25872	10.8202	3.96844	3.99966	0.402756	3.6229	5.06791	3.28061	2.11296	1.63377	1.86166	2.50355	3.31066	0.802684	-1.32032	-2.39393	-1.27018	2.19486	4.95872	5.00321	5.01742	4.90581	4.90028	4.95613	4.88816	5.37478	5.09092	5.04208	4.94067	5.02494	5.07103	5.0149	4.99551	4.97673	4.97802	4.99551	5.02028	4.93433	4.89051	4.85054	4.88785	4.99161
ACCN4	1.90705	-4.54813	-2.5321	-1.95694	-0.0831132	1.90046	-3.50453	0.420439	4.92189	-3.31207	1.57234	3.85368	-2.12675	-1.1036	-0.159502	-1.18134	2.0768	-1.4297	0.691294	-0.695071	-1.56293	-4.67686	4.45637	-1.74934	4.97627	4.77548	4.84516	4.87174	4.92351	4.96849	4.81095	4.95458	5.13266	4.82072	4.9748	5.03229	4.84861	4.87609	4.92768	4.88943	4.98471	4.87108	4.93754	4.8855	4.88278	4.7807	5.08068	4.87011
ACCN5	5.97178	1.20017	2.77714	7.21922	1.63709	-3.40529	4.08161	4.31659	2.27127	12.5639	9.44792	5.05698	4.56582	-1.41038	0.73906	-0.278708	3.03301	1.99424	3.41446	6.54256	1.08049	0.694435	0.577154	3.55611	5.10979	4.9606	5.01566	5.1672	4.97534	4.83371	5.07363	5.10361	5.01665	5.29623	5.21238	5.06768	5.05544	4.86476	4.95487	4.91793	5.01364	4.97957	5.02358	5.12982	4.96902	4.94623	4.94821	5.03301
ACCS	92.5773	82.6673	73.752	91.3886	76.3663	58.5268	13.9738	8.62929	6.25475	82.9593	112.184	202.047	197.454	260.965	231.594	147.566	195.151	196.912	224.986	219.088	412.836	211.546	391.892	192.036	6.65902	6.56287	6.4937	6.72383	6.44801	5.97447	5.42911	5.28313	5.20417	6.54645	6.8653	7.58748	7.55276	7.95747	7.87268	7.16428	7.60184	7.6476	7.81373	8.20565	8.9943	7.81454	9.14035	7.68548
ACCSL	6.49317	-0.633476	-2.91039	-0.839339	-0.459448	0.46833	-0.760433	-1.68412	-4.79889	5.7906	1.98209	0.442671	-1.41487	-0.483913	-1.31258	1.25153	-0.849647	1.39	0.687364	2.5639	1.38855	0.842891	1.55137	-0.310383	5.12581	4.90218	4.83302	4.90657	4.91184	4.93276	4.90554	4.8732	4.74029	5.0975	4.98614	4.92906	4.87113	4.89648	4.89073	4.96532	4.89296	4.96211	4.93747	4.99512	4.97873	4.95045	4.97988	4.91573
ACD	353.524	317.109	346.786	316.892	322.868	371.685	209.036	121.785	107.025	335.356	341.666	371.516	351.308	374.875	349.61	342.481	316.649	333.005	324.19	226.891	229.511	330.421	185.186	313.073	8.31419	8.18277	8.31971	8.27569	8.17967	8.03389	8.03107	7.60134	7.67334	8.25223	8.28315	8.4083	8.32282	8.44727	8.4142	8.33967	8.26539	8.37002	8.31873	8.24942	8.18568	8.42919	8.08791	8.32881
ACE	-0.956181	-2.34091	-1.96388	-2.00429	-0.532403	2.9034	-4.6672	-2.70245	-2.15983	-5.23221	-0.115476	-0.81528	-2.91063	1.76235	0.750135	-1.67804	-5.27389	2.40231	-1.09872	-2.73802	-2.01453	-0.501272	-3.44507	-2.15222	4.87814	4.84639	4.86408	4.87004	4.90898	4.99273	4.76872	4.83501	4.84226	4.76302	4.92479	4.89058	4.82317	4.96807	4.95523	4.87407	4.74832	4.99241	4.88087	4.81582	4.86822	4.90961	4.81844	4.85845
ACE2	1.72294	8.89754	0.935142	1.01283	10.7171	16.7668	3.09982	2.35003	1.87241	6.84577	3.44849	8.29873	5.95692	8.60127	4.43011	4.67474	1.30865	6.98294	4.67023	7.29887	2.513	7.32697	3.5191	1.05332	4.96999	5.19924	4.95557	4.96578	5.23961	5.28599	5.03882	5.02874	5.00031	5.12811	5.03257	5.15773	5.09687	5.16623	5.06538	5.06518	4.96081	5.13448	5.06282	5.15658	5.01395	5.15681	5.04894	4.95828
ACER1	0.79813	-0.255539	0.935657	-3.74728	-1.40574	-0.75319	-1.88977	3.99157	-2.04144	3.23625	-3.33203	-0.0617505	-0.378695	-0.294102	-2.14757	1.30142	1.53996	2.32329	4.61591	-2.64474	0.376079	0.393985	-2.37255	-0.223724	4.9386	4.91402	4.95561	4.81281	4.88152	4.90078	4.86518	5.09119	4.84664	5.01954	4.82627	4.91373	4.90438	4.90207	4.86535	4.96711	4.96769	4.99014	5.06115	4.81909	4.94569	4.93625	4.85172	4.91842
ACER2	26.07	27.8477	15.1506	13.3584	20.6189	50.5461	29.3174	33.8191	27.0633	18.5191	14.7077	20.0316	15.7909	16.151	16.16	16.2289	16.8014	14.9032	15.5117	8.94812	14.8737	14.6312	18.6569	12.5895	5.64025	5.69057	5.39513	5.3654	5.49758	5.86381	5.89496	6.1696	6.15537	5.44945	5.35767	5.43961	5.35226	5.36309	5.38636	5.35589	5.38342	5.35505	5.35555	5.20886	5.4331	5.37156	5.59655	5.30816
ACER3	174.552	189.207	199.047	168.837	214.223	164.399	72.1726	35.6527	23.0009	169.927	199.571	239.407	226.315	228.414	141.227	158.404	204.054	177.754	190.067	152.604	104.655	108.109	113.764	211.974	7.41367	7.54024	7.62771	7.46419	7.64463	6.95453	6.69063	6.21309	6.01781	7.37097	7.5944	7.82387	7.72783	7.77941	7.2106	7.27137	7.66349	7.51879	7.5904	7.7319	7.15563	6.93138	7.44609	7.82118
ACHE	3.13962	0.484493	1.25411	-5.1704	0.470262	-3.89275	2.36294	-0.0715766	0.0412081	-0.639549	-1.43194	0.0643558	1.89885	0.0266915	1.06398	4.92482	-5.38909	-1.58323	-3.93519	-0.0228244	-0.100216	6.83062	-0.2204	1.25746	5.01647	4.93792	4.96742	4.76666	4.94026	4.81993	5.01428	4.93488	4.92896	4.90312	4.88521	4.91696	4.97403	4.91238	4.96427	5.07137	4.745	4.8658	4.79108	4.90695	4.93009	5.14132	4.92125	4.96378
ACIN1	352.959	367.288	323.745	307.141	360.597	682.048	417.736	397.399	339.182	305.177	345.484	392.713	347.46	356.669	441.113	404.995	330.759	299.048	335.065	296.84	312.009	452.116	360.989	359.08	8.31236	8.37895	8.2197	8.23093	8.32222	8.83347	8.93459	9.12097	9.08047	8.14355	8.30511	8.49477	8.30701	8.38769	8.7511	8.57327	8.31925	8.2355	8.36291	8.62749	8.60074	8.85139	9.02563	8.50967
ACLY	784.996	720.779	668.624	651.339	681.898	766.16	416.372	418.209	460.796	816.024	719.955	655.364	692.073	698.904	566.888	600.374	682.393	563.391	665.473	594.452	510.766	580.245	444.744	618.799	9.37151	9.27452	9.15483	9.2272	9.16541	9.00482	8.93178	9.18691	9.40915	9.44238	9.2755	9.21803	9.28898	9.33279	9.1124	9.15001	9.36513	9.10105	9.35998	9.62617	9.28756	9.22343	9.30922	9.22643
ACMSD	-1.87507	-1.79565	-4.42037	2.67442	-2.81418	-1.87887	6.92885	-1.36681	1.02038	-4.23654	-4.42593	-5.29043	3.3058	-4.69271	-2.30867	4.66322	1.35548	4.04745	0.144483	-1.25452	-12.3174	6.25725	-1.73666	-5.03864	4.84716	4.86476	4.78272	5.01988	4.83667	4.87289	5.1746	4.88517	4.96719	4.79359	4.78916	4.74535	5.01847	4.76126	4.86054	5.06473	4.96225	5.0445	4.92051	4.86597	4.53344	5.12203	4.873	4.76857
ACN9	221.395	214.764	260.594	230.918	182.667	207.617	77.0388	44.021	45.0462	246.458	230.051	164.254	153.363	151.104	107.488	126.349	170.342	157.863	141.314	103.568	109.168	136.562	87.3584	146.484	7.73	7.70412	7.96084	7.86971	7.44079	7.25852	6.77118	6.39782	6.63246	7.85446	7.77853	7.30052	7.19573	7.2106	6.85858	6.96271	7.41687	7.35848	7.18571	7.18277	7.21291	7.23848	7.07049	7.32552
ACO1	627.211	713.791	701.019	647.376	728.296	962.812	488.355	347.049	238.034	702.947	708.841	1014.83	995.405	1022.36	774.05	844.899	935.024	887.711	806.166	494.111	462.263	690.683	352.608	635.658	9.06549	9.26108	9.22243	9.21583	9.26511	9.30995	9.14275	8.93761	8.63328	9.24425	9.25633	9.85942	9.79319	9.88642	9.57101	9.69999	9.84459	9.75294	9.61563	9.36444	9.14455	9.47402	8.99889	9.26459
ACO2	144.572	187.44	180.737	160.832	155.705	220.09	143.228	123.74	88.3593	200.208	187.218	165.553	117.543	103.629	118.514	103.181	135.158	113.346	135.604	76.7942	172.518	163.176	114.84	207.748	7.16992	7.52853	7.51556	7.40167	7.23984	7.34617	7.55694	7.62064	7.44366	7.59248	7.50525	7.3137	6.85511	6.7399	6.97575	6.71745	7.09498	6.92604	7.12675	6.81068	7.81888	7.48584	7.45839	7.79533
ACOT1	30.6035	29.7277	39.1381	34.0467	34.6149	31.424	16.0864	8.01001	7.97623	35.3541	29.2831	36.8046	35.4848	27.3254	32.3124	24.7086	27.1584	31.0475	26.1636	12.5288	16.5226	27.1415	16.1163	21.1442	5.74067	5.72711	5.96567	5.87241	5.8078	5.56102	5.50457	5.25722	5.30294	5.82823	5.711	5.78781	5.77317	5.61122	5.76584	5.54167	5.62474	5.73582	5.61949	5.34346	5.48445	5.69147	5.49997	5.54868
ACOT11	152.887	160.844	167.725	132.624	174.248	173.004	81.1384	42.0784	20.8792	139.21	103.1	104.315	103.207	100.057	120.512	109.046	97.9037	105.624	98.6953	76.2885	90.4892	83.5633	78.5874	82.9002	7.23937	7.33561	7.42537	7.1637	7.38398	7.02154	6.82214	6.35222	5.9383	7.12588	6.778	6.72835	6.71135	6.69898	6.99716	6.78517	6.70164	6.83598	6.744	6.80385	6.95492	6.65338	6.93292	6.64626
ACOT12	0.637241	6.78575	2.53111	-5.05995	2.67537	2.43386	1.59017	1.28097	-2.62546	5.22559	3.11416	-2.14628	-4.42207	0.66692	-3.51764	-2.73338	1.50314	6.3413	2.65153	4.44422	-1.72181	-7.38654	-0.710726	-1.60243	4.93328	5.13374	5.00815	4.77029	5.00749	4.98196	4.98736	4.98754	4.82458	5.08061	5.02219	4.84748	4.77564	4.9342	4.8229	4.84034	4.96677	5.11558	5.00031	5.05849	4.87747	4.69559	4.90638	4.87513
ACOT2	38.3741	43.6136	59.0426	53.9479	39.7775	36.3364	19.8596	11.5691	11.6548	42.0667	61.6611	57.7999	53.8862	44.5515	37.7621	47.4155	52.9595	54.9111	51.2205	27.8456	31.243	21.7211	25.1498	41.8489	5.89687	6.01419	6.30935	6.24972	5.91294	5.64945	5.62964	5.40619	5.51148	5.96216	6.27493	6.14795	6.08467	5.94869	5.87293	5.97924	6.10477	6.18275	6.09715	5.82482	5.91294	5.56378	5.80865	6.01306
ACOT4	321.892	268.813	280.456	243.292	224.45	219.344	90.9536	47.5382	36.7846	237.493	183.508	247.417	221.361	218.096	191.046	184.78	222.483	204.316	202.231	91.369	103.199	158.333	70.0535	131.89	8.19343	7.97617	8.05213	7.93318	7.7085	7.33792	6.96623	6.48408	6.43241	7.81034	7.48426	7.8708	7.69409	7.71427	7.6076	7.48813	7.77143	7.7085	7.66505	7.02022	7.13756	7.44332	6.77876	7.1944
ACOT6	-4.71004	-1.39976	-1.95699	-3.12704	-1.09642	-1.38761	3.27851	-5.19383	-0.88521	-1.41171	-1.50153	-2.08404	-0.615939	-4.56328	4.66152	1.41316	2.04962	-3.83789	3.14728	5.0604	1.1492	-1.36467	-0.936594	2.85405	4.75025	4.87704	4.86434	4.83279	4.89058	4.88505	5.04524	4.74316	4.89208	4.87918	4.88302	4.84938	4.89698	4.76479	5.07246	4.97053	4.98403	4.79094	5.01499	5.07993	4.97131	4.88246	4.89802	5.0121
ACOT7	417.143	417.967	475.978	444.476	383.282	447.665	255.694	194.081	213.328	341.877	329.803	310.639	332.556	298.74	289.967	292.599	268.415	243.712	249.096	124.688	122.934	210.53	95.0023	201.432	8.53956	8.53724	8.713	8.70712	8.40698	8.28248	8.29425	8.18636	8.49272	8.27725	8.24501	8.1597	8.25106	8.15083	8.18467	8.13406	8.03551	7.96084	7.95804	7.44033	7.35802	7.80771	7.18957	7.75039
ACOT8	64.3941	95.1071	84.8676	62.5436	67.5943	73.3341	37.2963	25.276	46.6789	62.5434	65.8359	81.2636	77.3355	66.3687	84.5887	66.4861	72.4159	65.1267	70.2885	41.5686	38.0126	31.8639	24.0737	33.919	6.32387	6.69765	6.62073	6.38491	6.3308	6.13903	6.07888	5.90721	6.66453	6.28497	6.3258	6.45447	6.41422	6.2892	6.58241	6.26728	6.38641	6.33748	6.38524	6.16636	6.06274	5.79767	5.77823	5.85302
ACOT9	424.594	443.404	472.102	416.322	409.695	613.239	362.27	334.662	319.83	480.46	469.381	420.042	404.263	348.476	378.934	357.35	358.019	392.949	337.645	217.873	174.095	315.004	149.657	247.577	8.56459	8.61976	8.70109	8.63016	8.49117	8.6873	8.76542	8.88726	8.9971	8.73635	8.71022	8.59304	8.50468	8.35734	8.52895	8.40348	8.44051	8.60443	8.3727	8.19797	7.83288	8.36291	7.80168	8.01837
ACOX1	28.2516	27.9277	27.9513	14.505	20.8176	31.6492	18.6242	27.9145	29.7567	24.2522	26.8169	28.4571	26.714	23.2531	16.2095	25.0534	21.9732	16.557	19.7161	18.4727	13.1766	16.3426	10.886	17.6825	5.69326	5.69391	5.7274	5.39683	5.50114	5.56576	5.59107	5.9932	6.23317	5.59531	5.65725	5.62382	5.60462	5.5232	5.38829	5.54936	5.50855	5.39408	5.46576	5.54319	5.37618	5.4186	5.31751	5.45552
ACOX2	39.0333	29.6964	42.2922	34.2262	33.3699	30.4329	15.029	11.7018	9.77784	24.8255	13.1932	5.64914	10.1296	4.21888	6.09594	6.3515	7.74573	6.63481	4.79089	1.35202	1.18056	3.98447	2.23277	5.80226	5.91092	5.72578	6.0307	5.87634	5.78443	5.54395	5.46991	5.41183	5.40896	5.60908	5.31838	5.08362	5.20671	5.04197	5.11703	5.10966	5.1485	5.12346	5.06639	4.95314	4.97256	5.05037	5.00242	5.10184
ACOX3	46.6482	72.7079	49.8102	40.568	46.8546	56.1493	38.6207	16.4477	13.7466	45.8923	41.3821	35.9315	28.7304	28.2253	36.8937	26.5676	25.8162	23.9824	41.8187	29.5346	47.3901	41.9984	38.6544	42.8211	6.05383	6.44997	6.16555	6.01014	6.02861	5.94309	6.10598	5.62415	5.61498	6.0276	5.9609	5.7697	5.63771	5.63057	5.85755	5.57879	5.59531	5.57118	5.93519	5.8703	6.25059	5.99906	6.16206	6.03143
ACOXL	-0.480633	4.8576	-0.996277	-2.4638	-2.54236	-2.39853	6.24972	-0.269723	-1.92009	0.549026	-2.01947	4.93884	3.59765	2.76499	7.40762	6.93945	5.47148	2.95696	4.28039	-1.13395	-0.178524	2.29449	-1.06182	1.0937	4.89511	5.07433	4.89356	4.85497	4.84424	4.85924	5.14869	4.92691	4.85094	4.93835	4.86742	5.06422	5.02631	4.99909	5.15328	5.12635	5.08403	5.00975	5.05045	4.87016	4.9276	4.99708	4.89441	4.95958
ACP1	1342.95	1410.35	1505.79	1338.27	1201.14	1294.64	584.361	484.915	568.994	1227.24	1169.26	1009.99	1063.93	991.214	901.187	825.92	990.323	987.462	880.708	490.149	595.101	783.757	458.861	809.28	10.1152	10.2021	10.2574	10.2296	9.94815	9.75294	9.37151	9.37358	9.64685	10.0255	9.96302	9.85423	9.88869	9.83168	9.79087	9.65438	9.92776	9.93873	9.74801	9.35371	9.49739	9.64752	9.35191	9.60915
ACP2	205.785	214.153	258.633	212.507	243.637	343.201	212.7	122.675	94.615	225.55	254.75	278.898	255.263	255.453	241.732	188.019	235.232	236.58	205.19	184.583	270.031	169.389	245.917	301.582	7.63783	7.70106	7.95394	7.76543	7.81454	7.93318	8.0496	7.61141	7.52552	7.75187	7.91265	8.02839	7.89447	7.92897	7.93408	7.51607	7.85296	7.91455	7.68225	7.97514	8.40062	7.53527	8.48151	8.2801
ACP5	11.5881	12.6535	9.58129	8.79273	9.95293	15.3543	10.318	-0.48459	2.24465	10.2621	1.80325	12.4558	8.15722	8.46737	13.6937	18.6468	11.0481	7.45329	7.72367	3.76294	14.209	6.71295	11.9958	12.4803	5.27491	5.30886	5.22982	5.217	5.21849	5.25675	5.29454	4.91812	5.01562	5.23134	4.98091	5.25904	5.15397	5.16358	5.3234	5.40979	5.23564	5.14634	5.14735	5.03625	5.40997	5.13656	5.35226	5.3054
ACP6	117.677	107.705	112.507	110.655	108.498	95.0482	52.9979	31.5047	13.651	111.755	108.939	136.761	133.027	133.482	105.981	117.553	95.7666	120.228	130.129	82.8534	126.381	116.729	100.051	160.561	6.9189	6.83168	6.92262	6.94757	6.80385	6.3747	6.37841	6.09216	5.60858	6.85042	6.8335	7.05003	7.01305	7.03465	6.84168	6.87408	6.67747	7.00479	7.0761	6.90944	7.39992	7.03158	7.2696	7.44707
ACPL2	43.0701	50.3542	44.2066	50.9166	51.311	44.4782	21.8705	22.3168	4.58108	42.4592	55.3747	55.2236	45.6667	63.1497	46.6093	45.9249	52.7555	42.9041	62.2727	39.8772	44.878	44.526	35.8903	63.541	5.98785	6.12699	6.06577	6.20193	6.10227	5.77396	5.6935	5.81875	5.11826	5.9682	6.1767	6.10755	5.95745	6.24106	6.04498	5.95745	6.10094	5.96722	6.26744	6.1285	6.19945	6.0499	6.09907	6.37776
ACPP	15.6447	7.62057	8.41438	13.1309	12.1645	15.334	4.65572	-0.0679183	0.112219	18.9835	4.33551	5.77629	4.28283	11.3627	2.9302	5.6482	0.910736	3.46005	5.98707	8.28397	36.8487	10.749	37.3041	25.8105	5.39043	5.16102	5.19186	5.35663	5.27953	5.25629	5.09416	4.93499	4.93144	5.45919	5.05973	5.08718	5.04781	5.23945	5.02234	5.09217	4.94797	5.02595	5.101	5.1891	6.0388	5.25924	6.12962	5.67287
ACPT	14.8541	7.06243	9.08581	3.76933	5.82864	18.8486	4.35086	8.596	10.0436	4.14699	9.50742	12.1399	3.80199	9.62456	9.92672	12.0992	5.66677	9.46989	6.61855	12.3588	5.1839	19.5418	9.14945	7.4627	5.36777	5.14276	5.21504	5.05462	5.09916	5.33016	5.08309	5.28172	5.42378	5.04669	5.21495	5.25179	5.03289	5.19508	5.223	5.25664	5.08918	5.20387	5.11845	5.33534	5.10215	5.51033	5.25212	5.14965
ACR	10.9516	1.18129	6.71222	-2.42866	0.200334	9.76499	6.75116	-0.00432731	-2.23408	2.67738	3.5499	13.9274	0.832532	-0.565914	2.72359	-0.140326	3.68017	4.5459	0.879873	-1.7488	2.96157	4.37793	11.2363	12.3348	5.25787	4.96014	5.14043	4.85659	4.93225	5.1442	5.16918	4.93757	4.83983	5.00152	5.03564	5.29623	4.94154	4.89394	5.0151	4.92247	5.03237	5.05984	4.94422	4.84954	5.02922	5.06195	5.32942	5.29805
ACRBP	0.567623	1.62491	-1.30126	0.186975	-5.10805	3.68412	-4.1272	1.06274	2.14472	-0.0915987	-3.53039	-0.370871	-2.4881	1.05607	0.660401	1.26785	-4.47353	6.03708	1.72146	-4.52443	-4.34922	-1.93413	2.43202	-4.49746	4.93095	4.97328	4.88501	4.94044	4.76302	5.01127	4.78904	4.97963	5.01216	4.91921	4.8194	4.90412	4.83639	4.94633	4.95214	4.9662	4.77264	5.10666	4.97066	4.75143	4.79144	4.86525	5.00982	4.78708
ACRC	13.9508	13.6571	11.9291	10.442	15.6309	56.6073	52.9412	63.3481	17.2448	24.5922	20.6724	11.3349	14.3071	15.0928	13.8624	15.9084	19.0975	16.0659	19.7665	32.9184	30.8615	21.6977	32.6936	22.0857	5.34406	5.33854	5.30294	5.26708	5.37173	5.948	6.37692	6.77384	5.78122	5.60386	5.51397	5.23206	5.31782	5.33591	5.3276	5.34722	5.44033	5.38369	5.4669	5.95805	5.9035	5.56281	6.02609	5.57506
ACRV1	-0.621678	-0.0599442	-0.329212	2.67807	7.5519	0.246185	2.56048	2.4894	1.70311	3.87398	5.10032	9.72839	4.81673	7.04583	9.78763	1.11116	3.78147	9.25286	7.53999	5.87372	3.86412	4.8667	5.43547	4.32571	4.89067	4.92011	4.91543	5.02014	5.14774	4.92715	5.02111	5.03398	4.9929	5.03808	5.08153	5.19751	5.06316	5.1249	5.21907	4.96143	5.03533	5.19796	5.14191	5.10712	5.05807	5.07813	5.11458	5.05538
ACSBG1	0.357944	4.28124	7.24883	0.178728	11.5373	15.287	-3.26704	2.10866	1.82688	2.3874	5.69665	4.17553	6.55813	2.1397	4.75934	8.71235	0.279396	0.747967	0.36868	3.16696	3.77287	-1.19091	1.21921	1.63121	4.92371	5.05554	5.15673	4.94023	5.26278	5.2558	4.81905	5.01983	4.99799	4.99213	5.09943	5.04193	5.11171	4.97914	5.07578	5.1727	4.92765	4.94165	4.92782	5.0151	5.05533	4.88775	4.96912	4.97486
ACSBG2	2.93897	-0.927639	-4.12792	4.07393	6.03782	1.51757	-2.81719	-2.18496	0.514219	-2.60086	-2.61617	2.02513	6.77557	-8.42742	-4.91164	-2.40305	3.10966	-1.12358	-1.88493	5.14153	4.22385	-5.32835	-4.96494	-0.59745	5.00949	4.89172	4.79228	5.06556	5.10472	4.95901	4.83431	4.85454	4.94793	4.84307	4.84884	4.97858	5.11724	4.63825	4.77822	4.85035	5.0151	4.88079	4.85603	5.08198	5.06938	4.76066	4.76449	4.90685
ACSF2	18.2213	31.2639	31.9151	26.1549	30.8051	31.9824	20.806	31.6665	16.4734	41.8924	37.4583	110.945	116.359	131.816	147.353	154.034	109.605	124.192	101.614	74.3449	106.494	63.8286	75.6245	51.4801	5.45814	5.76016	5.81071	5.69858	5.71987	5.57168	5.66123	6.09907	5.74611	5.95717	5.87603	6.80043	6.8428	7.01856	7.26032	7.22635	6.83598	7.04923	6.77833	6.767	7.17934	6.37239	6.87836	6.1917
ACSF3	50.5259	59.798	62.3875	45.5214	55.946	60.7903	34.4294	22.5177	20.1574	44.9284	42.313	57.6111	60.6995	51.5882	59.553	71.78	50.3907	61.3021	72.3686	39.5513	31.4203	55.1709	32.5427	49.9193	6.12129	6.2763	6.35222	6.10337	6.1739	5.99833	6.01551	5.82482	5.91048	6.01072	5.97255	6.14552	6.18871	6.0524	6.25302	6.34385	6.06142	6.28329	6.41169	6.12177	5.9165	6.24402	6.02252	6.16484
ACSL1	59.824	57.6988	56.4204	54.3165	59.9754	84.3105	41.0548	41.142	50.1917	64.7443	69.1203	84.7842	79.174	65.5666	49.1942	64.1655	52.0346	77.3459	63.1452	39.3266	46.0339	54.7661	37.3866	73.9897	6.25339	6.24078	6.27591	6.25624	6.23007	6.26233	6.15476	6.32988	6.7405	6.31457	6.37033	6.50343	6.43903	6.27706	6.08929	6.23391	6.08888	6.50006	6.28073	6.11743	6.22346	6.23604	6.13137	6.53205
ACSL3	302.839	276.731	312.794	252.784	308.875	482.055	412.315	310.744	239.19	286.483	330.782	407.868	443.457	427.48	280.322	337.199	397.708	355.11	342.3	234.349	386.225	233.01	294.925	547.48	8.12108	8.01837	8.18035	7.97664	8.11962	8.37895	8.9208	8.80698	8.64106	8.04344	8.24837	8.54519	8.62254	8.63639	8.14001	8.32083	8.58881	8.45987	8.3941	8.29281	8.90106	7.9383	8.72777	9.0612
ACSL4	71.9136	54.1313	72.3794	65.269	58.7557	110.11	55.7762	51.9353	42.9376	63.6992	60.831	57.2993	56.7265	56.116	40.6423	53.8028	52.7433	41.9723	47.6068	32.9371	20.8621	37.862	13.3669	50.0652	6.41988	6.18386	6.48144	6.42331	6.21053	6.50944	6.4266	6.57059	6.58449	6.30258	6.26321	6.14068	6.12886	6.13355	5.92904	6.07629	6.1005	5.94911	6.03909	5.95866	5.61775	5.91958	5.39921	6.1673
ACSL5	33.7315	36.1736	35.6544	31.8177	31.1479	40.7506	26.7789	14.4825	8.66077	26.9207	28.1958	55.1976	49.8043	53.4745	41.875	39.5236	46.1143	37.4031	33.5858	25.0376	30.4829	17.9013	25.529	48.5104	5.81158	5.86053	5.89606	5.82393	5.73068	5.711	5.83134	5.53849	5.34238	5.64882	5.68591	6.10663	6.02726	6.09301	5.95562	5.84682	5.98998	5.86351	5.77698	5.75061	5.89161	5.4662	5.81911	6.14068
ACSL6	0.0208315	-1.77256	0.711672	1.49697	-0.559207	-3.31988	-2.63131	-1.39153	-0.395243	-0.463047	-0.466072	0.646633	-1.81633	-2.68757	-2.92288	-1.61743	-2.61013	0.459576	1.91202	-1.4153	-2.53719	-0.16355	-1.87694	-2.21415	4.91238	4.86542	4.94793	4.98146	4.90804	4.83556	4.84065	4.88428	4.91195	4.90817	4.91411	4.93579	4.85814	4.82257	4.84084	4.87634	4.83512	4.93095	4.97677	4.86072	4.85207	4.91958	4.86817	4.85679
ACSM1	-3.43985	-7.26202	-2.19714	-6.11063	-10.6388	-1.19795	0.472267	-4.96551	1.33869	-4.55769	-10.1032	-4.79162	-2.37521	-3.70678	-3.21996	-4.7511	-2.76173	-1.32783	-5.84866	-3.32958	-4.93261	-8.44363	-4.45188	-7.11175	4.79318	4.69055	4.857	4.73852	4.59385	4.88969	4.94865	4.7519	4.97949	4.78425	4.6064	4.76074	4.8399	4.79165	4.83147	4.77616	4.82991	4.87429	4.72516	4.79548	4.77533	4.65924	4.78204	4.70672
ACSM2B	-1.53183	-1.96589	5.63929	1.97601	4.01731	-2.0625	-3.68243	1.55731	-1.34469	3.1161	-0.429809	-0.579435	2.13551	1.36101	-0.949924	2.64893	-1.67601	-1.72167	2.05882	2.0262	0.829121	-2.02476	-1.76913	-1.08222	4.85739	4.85826	5.10611	4.99642	5.0462	4.86834	4.80491	4.99841	4.87407	5.01619	4.91516	4.89794	4.98172	4.9561	4.9027	5.00649	4.86772	4.86139	4.98211	4.97711	4.96069	4.86217	4.87217	4.89146
ACSM3	3.45291	1.7622	3.91547	-1.45031	0.669903	1.44758	2.55885	-0.794506	1.57492	1.79171	1.32464	0.45597	1.99975	0.562751	-0.964904	3.05112	4.18323	2.42831	2.06353	0.355787	3.72225	0.710434	-0.82625	3.07783	5.02661	4.97778	5.05175	4.88746	4.9466	4.95704	5.02106	4.90624	4.98837	4.97466	4.96772	4.92967	4.97722	4.93076	4.90222	5.01851	5.0483	4.99317	4.98225	4.91938	5.05367	4.94668	4.90164	5.01901
ACSM5	0.310802	3.68602	0.662903	-0.902312	2.13643	0.265186	-0.698761	-2.11099	-3.52188	1.75803	1.24092	-0.399939	4.68539	-3.33312	-0.233962	4.45572	2.43892	1.21244	0.582448	0.602435	3.46506	0.928756	3.78124	1.56696	4.92169	5.03636	4.94642	4.90456	4.99116	4.92762	4.90792	4.857	4.79244	4.97348	4.96557	4.90317	5.05878	4.80151	4.92537	5.05883	4.99539	4.9561	4.93462	4.9278	5.04546	4.95272	5.05862	4.97256
ACSS1	79.3222	98.3253	80.2401	65.7132	70.1041	114.918	49.8762	28.3502	12.3998	87.8351	86.0453	168.81	153.834	196.927	232.146	201.045	150.441	138.094	138.423	111.275	168.196	170.841	165.566	162.483	6.50899	6.73533	6.56928	6.42784	6.3641	6.55083	6.31794	6.00915	5.54778	6.59673	6.58625	7.33628	7.20262	7.57088	7.87694	7.60617	7.24121	7.19153	7.15342	7.28382	7.78192	7.54962	7.94148	7.46466
ACSS2	410.698	392.625	367.129	360.972	396.877	927.923	652.993	584.556	347.425	375.928	336.14	763.896	856.4	808.038	817.899	832.998	620.903	590.538	533.798	317.678	310.925	321.941	288.065	291.583	8.51609	8.46335	8.38947	8.44399	8.45232	9.26586	9.53948	9.63081	9.10615	8.40779	8.26483	9.45703	9.59396	9.55081	9.6649	9.66625	9.22243	9.18355	9.02356	8.72844	8.59869	8.39673	8.69197	8.22941
ACSS3	8.47801	10.0393	-2.63602	0.897287	19.8298	18.7244	12.9657	12.7145	3.20723	6.60899	12.1147	10.8441	6.52573	11.2342	14.1256	10.0629	1.95985	4.78163	10.7623	17.2972	14.9212	13.5799	16.0414	4.38427	5.18496	5.23234	4.84153	4.96217	5.47835	5.32674	5.39466	5.46003	5.05581	5.12056	5.28967	5.22339	5.11115	5.23642	5.33424	5.20569	4.98123	5.06758	5.23169	5.50244	5.43449	5.34142	5.49736	5.05688
ACTA1	1.78669	6.44068	-5.96822	6.76221	9.56596	1.04216	9.49816	37.9313	83.9138	0.509803	4.31993	2.93687	3.91085	0.450298	4.77004	7.43279	1.28022	8.11793	12.6394	7.64857	0.307545	2.40716	6.29787	6.18438	4.97215	5.12261	4.73204	5.15349	5.20823	4.94668	5.26805	6.26001	7.38235	4.937	5.05906	5.00465	5.03663	4.92715	5.07646	5.13897	4.9593	5.16272	5.28179	5.16741	4.94316	5.00057	5.14428	5.11147
ACTA2	152.265	160.498	179.423	134.453	150.594	155.877	76.1364	49.208	53.4633	142.342	144.008	188.566	160.576	166.434	147.619	128.591	190.691	193.776	210.896	154.454	160.517	137.584	122.979	188.336	7.23363	7.33332	7.50832	7.18112	7.19962	6.88775	6.75173	6.5176	6.81862	7.15161	7.17159	7.4872	7.259	7.32977	7.26269	6.99099	7.56715	7.62962	7.71655	7.74641	7.73099	7.24944	7.54353	7.6615
ACTB	15256	14879.9	14599.2	13920.1	13818.8	14687.2	11318.7	8518.57	9013.46	13805	12553.9	12414	12515	12872	12977	12780.9	11765	12360.8	11558.1	10240.3	9463.82	12268	7775.77	10773.6	13.8009	13.8009	13.7666	13.7422	13.7666	13.8009	13.4737	13.0436	12.9171	13.7422	13.6292	13.6839	13.5987	13.6557	13.5987	13.6839	13.5987	13.5678	13.5987	13.5193	13.3666	13.5987	13.2602	13.5193
ACTBL2	3.85693	2.53414	-2.56473	-1.87244	-3.53642	1.84963	3.79514	-0.00637962	8.37955	6.63752	2.52093	-1.51734	3.71252	1.90701	-7.60144	-1.12369	-2.05281	1.87976	3.79445	0.86925	-1.41308	1.5071	3.99494	1.82156	5.04039	5.00204	4.84432	4.87398	4.8139	4.96714	5.06397	4.93734	5.3276	5.12152	5.00465	4.86782	5.02998	4.9721	4.68847	4.89135	4.85539	4.97636	5.03533	4.93618	4.88746	4.97116	5.06502	4.98076
ACTC1	4.10028	2.59711	2.87973	0.73044	1.06011	-0.911458	1.94075	5.37568	6.65029	0.858009	4.57249	-3.86367	5.87492	2.34665	1.7842	-4.96949	9.7178	2.65183	4.33268	0.118304	-5.93182	2.43398	-1.40889	4.37392	5.04864	5.00414	5.01824	4.95729	4.95851	4.89611	4.99958	5.14742	5.22785	4.948	5.06725	4.79137	5.09445	4.98538	4.98593	4.7685	5.20322	4.99939	5.05217	4.91163	4.74399	5.00139	4.88377	5.05653
ACTG1	11095.5	10283.8	12258.9	9555.14	11557.1	10216.5	5978.5	4803.23	5911.35	9957.22	10182.2	8971.32	9368.42	9479.15	9451.58	7658.47	8783.56	8802.65	8916.98	8507.48	6512.32	9277.14	5303.96	9277.5	13.1577	13.0742	13.3666	13.0888	13.4036	12.9171	12.5462	12.3579	12.3768	13.1931	13.2602	13.1385	13.1221	13.2096	13.179	13.0436	13.2449	13.1577	13.2304	13.3302	12.9171	13.2928	12.7804	13.3116
ACTG2	11.3029	14.3608	23.071	10.0117	15.137	8.21017	-1.11865	0.0663056	-1.75485	2.3851	4.35332	5.27656	-4.98836	-0.757503	-5.06514	1.33586	-2.8725	-6.56328	-3.30997	-2.85846	-2.37461	2.47987	-9.23628	-6.48677	5.26719	5.35831	5.61419	5.2538	5.3581	5.112	4.89348	4.94044	4.85725	4.99197	5.06033	5.0739	4.75425	4.88712	4.77394	4.96852	4.82593	4.69966	4.80966	4.81121	4.85684	5.00302	4.62041	4.72596
ACTL6A	783.405	720.724	836.587	777.355	745.744	845.048	380.963	238.713	173.589	804.748	838.541	560.131	588.433	530.363	484.855	543.66	576.889	561.15	497.202	353.989	394.44	490.233	303.201	586.383	9.36795	9.27387	9.44476	9.46126	9.29815	9.14359	8.83274	8.46994	8.23952	9.42588	9.47009	9.00822	9.04089	8.92945	8.88345	9.00207	9.11702	9.0939	8.9113	8.8762	8.93375	8.96596	8.77382	9.15001
ACTL6B	5.21692	1.05439	1.70389	5.67767	6.41274	5.17512	5.3379	-1.56148	2.41982	9.75238	5.53898	10.5677	1.65537	6.45903	-0.559837	3.06895	8.93526	7.74714	3.09136	5.74556	-1.25177	1.52618	7.36728	13.6631	5.08646	4.95651	4.9816	5.11655	5.11476	5.04401	5.11558	4.8772	5.02289	5.21659	5.0946	5.21761	4.96626	5.10973	4.91557	5.01913	5.18339	5.15361	5.01337	5.10259	4.89293	4.97176	5.1835	5.34142
ACTL7A	-0.728795	-3.51978	-2.08757	-5.37388	0.288858	-7.60754	1.77197	-1.37855	-9.48973	-5.75087	-10.3044	1.65327	-1.48456	-4.31788	-6.24742	-3.30726	-5.28628	-3.58532	-3.84718	-3.39647	-5.74144	-4.98563	-3.87622	-6.62833	4.88661	4.8082	4.86049	4.75884	4.93499	4.71559	4.99395	4.88473	4.57945	4.745	4.5989	4.96714	4.86868	4.77246	4.73481	4.82213	4.74812	4.79977	4.79359	4.79324	4.74991	4.77228	4.80309	4.72072
ACTL7B	-1.96496	-3.39801	-0.766053	1.56952	3.45506	4.55292	-2.77534	-3.01581	-0.653307	-2.11607	-7.80259	-0.725371	0.971052	1.3112	-3.00237	2.96501	1.28832	-5.46805	1.07939	0.245776	6.02642	-1.98714	0.000784144	-3.3712	4.84331	4.81211	4.9007	4.98403	5.03124	5.03107	4.83591	4.82433	4.90176	4.85797	4.68509	4.89334	4.94586	4.95438	4.8381	5.01614	4.95958	4.73743	4.95037	4.91577	5.13235	4.86338	4.9286	4.82161
ACTL8	3.21235	7.10076	-2.99469	11.3951	-1.37234	1.06235	0.734093	-3.83059	1.73992	6.05304	-2.58134	-1.47199	1.81837	0.349178	-4.2225	2.61681	2.64775	3.45297	-0.156848	-2.17505	-0.303097	4.68094	8.77973	-1.28577	5.01883	5.14405	4.82996	5.30009	4.8824	4.94715	4.9578	4.79463	4.99446	5.10409	4.84989	4.86957	4.97131	4.92348	4.80001	5.00535	5.00234	5.02574	4.9106	4.83452	4.92393	5.0722	5.23928	4.88532
ACTN1	4023.95	3959.88	3982.81	3797.09	3495.73	3402.09	2645.02	1599.2	1388.38	3806.86	3892.1	3075.5	3023.82	3145.68	3304.39	2920.82	3295.91	3424.89	3238.04	2812.72	1729.12	3042.07	1526.37	2601.66	11.7469	11.7259	11.6586	11.7657	11.5355	11.1062	11.4519	10.9236	10.6517	11.6997	11.7469	11.5397	11.4783	11.555	11.6455	11.51	11.7415	11.7612	11.7657	11.7999	10.9985	11.636	11.0404	11.2901
ACTN2	-6.20537	-0.649677	0.531021	0.233896	-3.62474	-4.16902	-1.84734	-5.01244	-3.60652	0.274162	-4.47815	-0.502501	0.801824	4.63258	0.194924	0.169557	-3.68271	0.520222	-4.71363	-0.40688	-2.22761	-3.17465	-3.24386	-2.09538	4.69609	4.90173	4.94222	4.94173	4.81058	4.81308	4.86658	4.74991	4.78897	4.92978	4.78713	4.90011	4.94038	5.05498	4.93816	4.93141	4.79747	4.93342	4.76685	4.89466	4.86227	4.82732	4.82497	4.85956
ACTN3	2.61137	0.0794487	-0.846405	-0.000433481	-1.82514	-0.0870864	8.30531	6.41251	15.803	-0.568703	-5.23872	3.04286	-0.0503259	-0.607273	2.40482	2.00486	0.797424	8.09477	-0.594859	-0.292745	-0.583149	-2.80912	2.21609	3.542	4.99977	4.92441	4.8982	4.93471	4.8675	4.91909	5.2251	5.18814	5.71161	4.90515	4.76646	5.00781	4.91415	4.89243	5.00478	4.9877	4.94429	5.16211	4.89692	4.89841	4.91442	4.83855	5.00197	5.03251
ACTN4	1157.93	1190.32	1095.23	1014.62	1257.43	1646.93	884.849	641.091	490.836	996.854	872.054	777.591	676.211	688	783.97	764.773	693.901	743.826	729.846	515.767	573.607	741.66	492.169	727.181	9.92034	9.95455	9.823	9.82204	10.0133	10.0663	9.95809	9.72909	9.49155	9.72063	9.52542	9.49282	9.25034	9.30518	9.59704	9.52542	9.38588	9.50429	9.47955	9.42211	9.44926	9.57197	9.45766	9.45766
ACTR10	1098.83	830.974	986.765	873.74	821.266	1070.35	692.796	645.845	487.724	995.21	930.805	1020.5	1169.44	1079.5	882.232	1010.23	1051.64	963.479	907.264	616.72	577.878	668.536	477.705	739.539	9.84194	9.45416	9.66625	9.61272	9.42744	9.45936	9.62453	9.73538	9.48338	9.71641	9.61974	9.86941	10.0268	9.97813	9.76194	9.94941	10.0225	9.88642	9.79427	9.68349	9.46032	9.43126	9.41382	9.48338
ACTR1A	508.598	576.723	659.894	516.099	510.744	536.994	344.899	266.285	212.59	546.568	539.085	522.256	560.948	544.005	511.158	509.413	494.991	480.98	421.237	267.41	305.726	363.436	233.273	394.468	8.78615	8.96757	9.13883	8.90652	8.7691	8.51792	8.6967	8.61773	8.48716	8.91252	8.88209	8.89203	8.97098	8.97919	8.9667	8.90652	8.88666	8.87928	8.6873	8.4729	8.57179	8.54949	8.4083	8.63076
ACTR1B	263.423	272.391	254.245	252.604	278.553	292.818	118.572	60.0431	47.1531	251.067	261.153	228.469	236.982	241.984	216.375	241.889	224.513	216.733	253.602	202.527	199.127	263.992	180.588	212.336	7.94503	7.99243	7.93318	7.97617	7.98792	7.73351	7.31087	6.72794	6.67434	7.88555	7.94087	7.75737	7.79483	7.8577	7.78242	7.86011	7.7805	7.79533	7.98497	8.09796	8.00609	8.11569	8.05491	7.82387
ACTR2	1464.35	1377.57	1370.89	1209.24	1328.72	1444.22	733.866	509.323	320.733	1295.24	1146.49	938.343	1047.19	853.98	954.505	849.059	924.695	1056.11	959.288	541.124	518.463	768.755	504.838	794.381	10.2308	10.1663	10.1271	10.0742	10.0919	9.89245	9.71641	9.43238	9.00291	10.1108	9.93377	9.73248	9.86619	9.63081	9.89404	9.71193	9.82204	10.0321	9.88536	9.49282	9.30995	9.62523	9.49379	9.57704
ACTR3	292.418	220.338	204.904	192.155	221.043	283.623	102.317	90.414	87.8149	193.225	217.432	135.19	187.633	153.303	147.253	192.82	149.35	149.78	122.416	119.525	117.214	138.073	86.4591	157.791	8.06977	7.7319	7.66652	7.63637	7.68874	7.6909	7.10915	7.20065	7.43884	7.54024	7.70412	7.03091	7.47888	7.22917	7.259	7.54839	7.23284	7.29332	6.99199	7.37926	7.29694	7.25476	7.05495	7.42642
ACTR3B	11.5793	7.92885	6.92201	9.52227	12.5762	12.2919	7.53447	7.42267	0.449542	12.2497	10.0139	9.50906	7.94492	2.47839	5.31922	6.50353	4.61285	12.1768	4.94334	8.29584	10.7113	12.0981	6.1582	5.34814	5.27467	5.16991	5.14649	5.23928	5.29017	5.19523	5.19658	5.23295	4.94546	5.28505	5.22972	5.19092	5.14886	4.98896	5.09306	5.11401	5.06059	5.28179	5.0704	5.18947	5.29386	5.29989	5.13961	5.08759
ACTR5	274.819	285.051	254.037	216.138	240.424	249.75	101.307	50.4147	26.1199	279.833	254.615	194.642	174.44	184.514	172.305	176.28	171.5	171.414	185.789	134.894	158.579	212.173	144.374	190.843	7.99442	8.05261	7.93211	7.78685	7.79589	7.51879	7.09448	6.53935	6.12212	8.01233	7.91221	7.5393	7.36905	7.48189	7.47022	7.4143	7.42537	7.47449	7.56021	7.54509	7.71383	7.81784	7.75523	7.67894
ACTR6	76.1884	55.7163	77.5883	78.2414	65.9945	122.529	54.0193	59.8089	46.4877	74.5932	98.8073	96.623	128.987	87.2177	95.698	127.04	100.425	103.62	121.229	54.9231	51.5172	69.8603	45.3878	78.4226	6.47389	6.21053	6.54069	6.57799	6.31044	6.61021	6.39573	6.7243	6.65969	6.44208	6.72901	6.64232	6.97449	6.55032	6.72584	6.9718	6.72761	6.81345	6.98	6.43785	6.32845	6.45865	6.31961	6.5883
ACTR8	25.5325	26.4678	23.8735	36.0793	29.2157	20.3331	19.0123	14.8413	6.111	35.0758	29.5866	35.3177	37.4789	40.7332	27.4817	34.1943	32.1478	33.4816	27.7441	23.3689	19.0091	23.3203	20.4107	28.688	5.62716	5.66219	5.63409	5.91531	5.68492	5.35752	5.60511	5.55801	5.19614	5.82205	5.71685	5.76016	5.81049	5.88074	5.66065	5.74881	5.73227	5.78497	5.65371	5.69477	5.56121	5.59871	5.65725	5.74094
ACTRT1	17.8775	21.2205	19.3847	25.3069	17.4252	25.4973	14.3783	13.4691	21.2299	20.2066	18.4128	21.197	10.315	23.6129	18.1148	21.7302	16.2083	12.6378	16.4938	20.5081	15.4539	20.1574	16.3447	18.4867	5.44927	5.53752	5.51495	5.68191	5.4186	5.45637	5.44452	5.49632	5.94911	5.49202	5.45468	5.46941	5.21072	5.53206	5.4331	5.47913	5.36799	5.29227	5.38279	5.60887	5.4505	5.52471	5.51004	5.47702
ACTRT2	-3.08783	1.9759	-6.60845	-0.270102	-3.02835	-6.69098	0.186127	-2.72312	-2.05113	-2.46148	-8.32267	-7.09917	-0.821909	-0.141659	-2.30085	-7.03595	-1.23239	-2.69106	-4.20666	-0.42323	-1.21734	-2.04634	-7.11447	-7.17562	4.80546	4.98481	4.70768	4.92521	4.83005	4.74083	4.93907	4.83431	4.84608	4.84731	4.66282	4.68421	4.89003	4.90757	4.86072	4.70293	4.88194	4.82938	4.78175	4.8941	4.89396	4.86119	4.69259	4.70442
ACVR1	189.6	157.711	159.583	176.668	194.892	315.233	206.73	164.098	78.9002	176.471	175.679	303.271	299.98	285.235	200.538	237.499	325.764	315.304	316.382	133.534	113.426	122.928	105.075	221.148	7.51507	7.31087	7.35944	7.52691	7.52179	7.81935	8.01596	7.97007	7.29869	7.41947	7.4249	8.13334	8.10426	8.08379	7.67597	7.8312	8.29966	8.308	8.28676	7.53168	7.2581	7.09737	7.34207	7.86971
ACVR1B	68.4099	65.6321	79.2519	66.3632	74.934	82.4654	48.7425	27.6996	16.2624	74.1041	79.7191	88.3861	83.992	84.9415	62.2798	72.7214	97.9159	85.7115	78.9829	45.6589	61.7158	61.912	48.9382	93.5818	6.37841	6.35895	6.56202	6.43496	6.42874	6.24488	6.29814	5.98477	5.73539	6.43634	6.51418	6.54921	6.49487	6.52224	6.29314	6.35497	6.7025	6.60698	6.50653	6.25007	6.51037	6.34385	6.39753	6.76985
ACVR1C	2.38868	-0.637753	3.8576	7.89142	1.92921	11.254	7.05027	2.90797	6.34839	1.37349	2.51766	1.50788	3.52533	3.21032	2.55055	1.45847	0.793137	1.58136	6.38003	8.00508	2.46487	6.39868	2.34914	3.65515	4.99187	4.90202	5.04985	5.18761	4.98411	5.1739	5.17911	5.05059	5.21155	4.96246	5.00444	4.963	5.02403	5.01259	5.00897	4.9721	4.944	4.96756	5.11219	5.17929	5.01237	5.12658	5.00634	5.03607
ACVR2A	19.3576	13.781	11.6327	11.7711	15.5213	28.5891	14.0034	14.5512	3.75968	21.2657	22.9369	27.8351	23.4668	18.3596	15.2396	18.0035	26.923	25.0894	25.474	19.4831	20.0639	17.3669	23.1286	22.9285	5.48291	5.34326	5.29421	5.31159	5.37004	5.50823	5.43061	5.54167	5.08049	5.51873	5.57423	5.60996	5.52723	5.41355	5.36089	5.39706	5.61902	5.59871	5.60207	5.57423	5.59055	5.44927	5.74881	5.59584
ACVR2B	8.6285	7.50251	-1.17986	7.78861	-0.980368	4.38868	11.1342	3.68487	4.37603	4.33158	3.3178	4.92758	8.31541	0.77776	8.63743	12.0832	10.1598	8.4687	-2.17536	6.14038	-2.69773	-0.696335	7.24747	8.32967	5.1894	5.15652	4.88794	5.18474	4.89446	5.02684	5.32504	5.07993	5.10909	5.05214	5.02852	5.06403	5.15845	4.93702	5.18743	5.2557	5.21458	5.17364	4.84633	5.11612	4.84644	4.90365	5.17905	5.1757
ACVRL1	-2.46667	-3.06869	1.51479	-3.09725	-1.60673	-2.73294	-2.20572	-0.871217	-0.871054	-2.73837	-6.08914	-2.31671	-0.152934	-4.68907	-4.0652	-4.50361	-2.05367	-0.987568	-6.75267	-1.54112	2.93534	-3.39664	-3.52833	-5.47052	4.82674	4.82264	4.97627	4.83376	4.87443	4.85156	4.85491	4.90321	4.89287	4.83814	4.73743	4.84239	4.9115	4.76144	4.80581	4.78513	4.85533	4.8848	4.69898	4.85659	5.02848	4.82036	4.8151	4.7547
ACY1	218.422	214.627	245.951	225.196	224.649	264.506	153.92	88.1235	79.3811	200.465	180.83	184.951	189.993	151.164	181.131	170.134	150.965	157.757	170.931	117.718	108.633	138.722	82.0721	121.61	7.71213	7.70236	7.89397	7.83631	7.71109	7.60499	7.64549	7.16509	7.30882	7.59297	7.45839	7.45713	7.49809	7.21188	7.53879	7.36429	7.24846	7.35749	7.44813	7.35493	7.208	7.26269	6.98957	7.09364
ACY3	5.3596	0.643726	10.0262	4.36939	7.86871	11.9746	-1.05956	-2.13957	0.810606	6.08971	7.03793	-0.965368	2.83226	6.50054	0.308571	3.30988	4.90691	5.78849	-4.44759	-0.140821	0.493748	5.35471	3.29295	1.11977	5.09063	4.94242	5.24351	5.07478	5.15907	5.18847	4.89542	4.85613	4.95889	5.10526	5.14116	4.88594	5.00356	5.11087	4.94154	5.026	5.06892	5.09767	4.77379	4.90308	4.94939	5.09265	5.04143	4.96035
ACYP1	110.495	114.797	121.176	95.412	112.922	148.797	66.9144	53.4465	61.1414	135.916	174.444	135.885	142.498	148.326	133.133	114.061	130.324	115.474	126.919	127.708	159.216	173.271	161.043	152.054	6.84913	6.9007	7.01655	6.77118	6.84706	6.83712	6.60983	6.60187	6.97695	7.10168	7.41596	7.03941	7.09799	7.17934	7.12747	6.83598	7.04085	6.95052	7.04387	7.47553	7.71934	7.56962	7.89893	7.37859
ACYP2	22.0605	24.9266	26.3046	28.5812	19.6713	27.0259	14.307	15.4812	39.6916	23.8717	29.1519	32.3233	34.9963	33.0126	25.1654	21.1927	21.8931	30.0419	25.2728	12.7947	13.0943	16.032	8.28618	11.9979	5.54845	5.62321	5.69	5.74991	5.47555	5.48291	5.4419	5.58344	6.50693	5.58578	5.70852	5.70641	5.76477	5.73122	5.60908	5.4669	5.50599	5.71532	5.59891	5.35391	5.3735	5.41227	5.2182	5.28702
ADA	242.971	241.459	264.295	220.516	248.29	218.895	113.333	95.0966	94.6927	246.063	221.426	218.813	188.499	207.69	188.395	189.842	188.68	163.816	175.085	165.083	281.087	225.191	242.565	288.041	7.84463	7.84579	7.97747	7.81373	7.83183	7.33591	7.24539	7.27674	7.52744	7.85241	7.72908	7.70572	7.48758	7.64877	7.59119	7.52691	7.54798	7.41058	7.4831	7.83752	8.4552	7.89173	8.46158	8.21177
ADAD1	1.62747	-4.40058	-0.642449	-2.65281	2.40567	2.74418	-2.79128	-1.23826	-2.15209	-6.12489	-4.2757	-1.62298	3.76925	-8.44767	-5.22017	-1.92283	-2.36459	3.96761	-3.17816	-2.29588	1.99503	-4.30296	-2.15776	-2.40629	4.96668	4.78032	4.90491	4.84753	4.99895	4.98867	4.83528	4.89027	4.8426	4.73423	4.79418	4.86468	5.03189	4.63759	4.76896	4.86568	4.84398	5.04208	4.81327	4.83064	4.99799	4.79406	4.85866	4.85002
ADAD2	-4.85998	-2.17746	-2.25704	1.27409	-3.09253	-5.58224	-4.32698	-3.21667	2.08822	-0.719864	-7.17414	-7.73859	-2.37155	0.307583	-1.53335	0.760888	3.5774	-2.34219	-7.39756	-4.95551	-8.9369	1.80443	-4.84014	-1.51971	4.7449	4.85115	4.85486	4.97446	4.82791	4.77399	4.7806	4.81679	5.0094	4.90068	4.70403	4.66315	4.84018	4.9218	4.88419	4.94979	5.02912	4.84172	4.68221	4.73699	4.64245	4.981	4.76776	4.87787
ADAL	12.9131	18.167	16.5018	19.6483	11.178	23.4377	5.98789	7.73534	11.2508	16.8154	18.6611	19.22	28.8746	27.3298	13.4413	16.3451	26.1569	25.3089	22.5783	25.8737	33.3683	18.8176	20.4332	24.5237	5.31319	5.45552	5.42697	5.53792	5.25212	5.41916	5.13852	5.2446	5.48982	5.40379	5.46256	5.42259	5.63999	5.61153	5.31727	5.35869	5.60405	5.60386	5.53141	5.77628	5.9609	5.49239	5.65753	5.63795
ADAM10	56.511	61.1387	45.4156	55.7638	69.8651	60.8927	24.6808	14.8699	7.75419	53.4531	65.7568	46.0839	53.3618	48.8245	26.2203	26.6204	44.2098	37.764	44.0145	41.5576	81.2268	57.5338	63.4078	122.398	6.21098	6.30058	6.08782	6.28009	6.3602	6.00052	5.77438	5.55988	5.29281	6.14737	6.32461	5.95447	6.07861	6.01345	5.63277	5.58064	5.95505	5.8703	5.9758	6.166	6.80947	6.27838	6.66003	7.10123
ADAM11	-3.19671	-3.68679	6.74569	1.62042	2.56587	1.52175	-1.56445	0.480338	-0.0848256	0.210685	-6.16482	-1.83794	-0.894717	-1.78344	3.22599	-1.22878	-0.31459	2.25475	-0.390162	1.5147	2.0178	-3.71793	0.623335	2.62712	4.80158	4.80351	5.14147	4.98566	5.00411	4.95921	4.87677	4.9571	4.92374	4.92773	4.73397	4.85776	4.88766	4.85255	5.03038	4.88746	4.9091	4.98834	4.90344	4.95926	4.99887	4.81082	4.94947	5.00441
ADAM12	7.29783	6.9114	6.36533	6.24599	12.6941	11.0446	7.18557	7.75662	1.11268	10.1763	7.6623	9.49968	10.0355	7.59068	16.0972	14.0893	11.5697	10.6199	17.2422	7.64614	3.87486	3.47648	7.8895	6.70176	5.14985	5.13751	5.12954	5.13568	5.29325	5.16948	5.18506	5.24566	4.97074	5.22843	5.16002	5.19013	5.2044	5.14043	5.38431	5.30366	5.24702	5.2388	5.40379	5.16726	5.05862	5.03392	5.20213	5.12856
ADAM15	934.071	961.961	1009.4	909.654	1128.54	1079.15	648.408	397.58	318.327	955.278	1059.35	806.356	804.322	783.421	709.829	640.389	700.151	632.48	673.103	673.34	1253.21	966.891	1051.18	1379.51	9.60503	9.65696	9.70541	9.67714	9.87153	9.46925	9.53142	9.12328	8.99134	9.65343	9.81518	9.54977	9.50509	9.50509	9.44476	9.24644	9.40467	9.27097	9.37457	9.81518	10.5221	9.95809	10.514	10.3233
ADAM17	292.753	276.666	236.215	253.833	291.677	523.01	334.193	289.625	220.773	267.899	308.126	414.38	443.876	486.405	473.042	466.995	417.09	413.969	408.041	371.675	325.224	289.589	372.659	389.857	8.0729	8.01642	7.83983	7.98371	8.04344	8.48784	8.64884	8.72498	8.53022	7.9657	8.14974	8.57256	8.62628	8.80629	8.85607	8.78615	8.64929	8.6708	8.64929	8.94754	8.66405	8.2355	9.06848	8.61177
ADAM18	2.04457	-5.78256	-4.57852	-2.05222	-1.29497	1.64183	2.0654	-0.668558	-3.45175	-4.95091	-7.23169	-5.59656	-2.92131	-3.4925	-0.112312	-4.19765	-4.20869	-1.91074	-0.299647	-1.41159	-2.93202	-2.1265	-2.65364	-9.14259	4.98055	4.73699	4.77781	4.86817	4.88459	4.9613	5.00369	4.91104	4.79516	4.77169	4.70157	4.73668	4.82273	4.79664	4.92899	4.79436	4.7804	4.8553	4.90627	4.86091	4.83829	4.8583	4.84402	4.64724
ADAM19	70.7865	76.4295	98.4483	74.9492	82.7542	72.9687	28.6157	10.3231	5.21775	77.4739	96.4115	59.7297	52.6871	54.7389	42.3995	48.1822	51.8731	48.3599	51.7948	63.5805	60.0104	81.1654	44.8891	147.582	6.40693	6.49639	6.77202	6.53877	6.52303	6.13404	5.87573	5.35505	5.14812	6.47772	6.70498	6.17716	6.06691	6.11406	5.96477	5.98971	6.08665	6.07004	6.10598	6.5886	6.47692	6.61935	6.30787	7.33752
ADAM2	6.70166	1.4692	9.53182	15.1961	10.0152	10.629	4.71461	8.2259	5.17738	10.0224	11.5274	7.66087	9.78389	9.86107	8.47525	11.8686	3.79639	16.0799	8.83204	2.79439	6.59651	25.5769	7.93037	8.01633	5.13274	4.96807	5.22822	5.41611	5.22014	5.16229	5.09655	5.26631	5.14608	5.2251	5.27227	5.14238	5.19751	5.20046	5.1824	5.25035	5.03602	5.38385	5.17929	5.00259	5.15144	5.65549	5.20387	5.16501
ADAM20	1.08844	-7.0811	-2.33733	-0.856185	4.61871	-5.88539	-2.07909	3.06992	-0.558161	0.141533	-5.81453	-2.25667	-0.594645	-2.65773	-5.03709	-4.28808	-1.37291	-3.80475	-5.6049	0.11761	-4.06405	-3.15177	1.71067	-0.0723572	4.94974	4.69494	4.85207	4.90606	5.06452	4.7653	4.85935	5.0567	4.90584	4.92537	4.74756	4.84412	4.89791	4.82352	4.77459	4.79228	4.87794	4.79196	4.73423	4.91156	4.80151	4.82783	4.98552	4.92363
ADAM21	2.07223	-3.03937	-4.71958	-5.62145	-0.965895	-3.66749	1.80826	-2.25025	-0.506281	-4.04335	5.04194	2.51864	3.08547	7.65462	2.60435	2.32565	0.546929	0.39529	2.76067	-1.53778	1.06002	-0.564972	0.125921	-2.54359	4.98172	4.82369	4.77161	4.75267	4.89507	4.8261	4.99534	4.85187	4.90788	4.7997	5.07982	4.99313	5.01145	5.14228	5.01098	4.99731	4.93579	4.92899	5.00352	4.85671	4.96839	4.9075	4.93299	4.84593
ADAM21P	-3.19629	-0.666546	-1.44849	1.378	0.664239	0.388019	-3.25857	0.275496	-2.80744	-2.08207	1.08345	0.25847	-3.15137	4.27893	-6.23991	5.31407	-0.211349	-4.59891	-2.23031	-1.88997	0.577877	2.0654	-6.92947	-6.84482	4.80164	4.90124	4.87993	4.97746	4.94628	4.93062	4.8193	4.94881	4.81763	4.85892	4.96038	4.92314	4.81564	5.0443	4.73508	5.08186	4.91199	4.76822	4.84432	4.845	4.9521	4.98968	4.69721	4.71409
ADAM22	-0.458673	-0.830641	-5.56565	0.0750263	-2.66997	-3.61966	-1.01879	-1.38034	-0.671081	0.194501	-0.799771	-0.615548	-1.26217	-2.06599	-2.36625	-1.5301	0.505366	-0.493412	1.38315	0.318332	-1.83695	1.76479	0.757391	-2.50038	4.89618	4.89523	4.74535	4.93709	4.84037	4.82761	4.89645	4.88465	4.90121	4.92712	4.9044	4.89684	4.87586	4.84365	4.85881	4.87846	4.93444	4.90063	4.95948	4.91856	4.8736	4.97941	4.95388	4.84716
ADAM23	55.463	58.198	53.1352	45.8133	63.48	83.8524	36.5509	15.8995	10.5384	60.1452	42.912	43.3199	58.4198	44.6346	34.1257	38.3915	33.8932	25.1001	33.7485	24.7236	56.1578	41.6877	47.354	79.7157	6.19414	6.24674	6.21945	6.10986	6.27532	6.25735	6.06179	5.60207	5.44833	6.24944	5.98273	5.9045	6.15537	5.95041	5.80904	5.82455	5.76869	5.59935	5.77861	5.74094	6.41376	5.99488	6.36299	6.60469
ADAM28	1.22617	-0.46041	-3.57863	-3.2848	-1.11307	-0.1169	-3.70251	-3.71751	0.84401	-0.459188	-5.03317	-1.24682	-1.68038	-1.9943	-2.36047	-2.07298	-2.30831	-4.36795	-3.46513	2.34134	-3.47606	-3.03906	-2.77584	-0.278409	4.95444	4.90788	4.80971	4.82787	4.8901	4.91837	4.80412	4.79808	4.96018	4.90831	4.77246	4.87666	4.86267	4.84577	4.85897	4.86104	4.84577	4.77452	4.80503	4.98709	4.82056	4.8312	4.8399	4.91692
ADAM29	1.76316	0.700825	-1.33527	3.38902	1.64379	4.51351	-2.88638	0.732901	9.94002	6.09958	2.20636	2.07031	-2.5928	-0.390942	3.1405	-2.35123	5.36244	3.96138	8.26794	4.10908	5.40444	4.31202	4.90917	0.0126495	4.97131	4.94457	4.88366	5.04135	4.97548	5.03009	4.83156	4.96636	5.41773	5.10606	4.99361	4.97988	4.83291	4.89938	5.02778	4.85217	5.08097	5.04176	5.16176	5.04789	5.11108	5.05998	5.09671	4.92659
ADAM30	-3.47517	7.29335	-1.96317	4.19972	1.19366	2.92606	-2.97592	-4.15033	-0.680971	0.727249	-0.185638	1.72322	-1.45825	-4.95599	-1.70055	2.01183	-6.06844	-3.8227	-1.11346	1.28771	-1.31766	0.425788	-3.60848	-2.38068	4.79196	5.15026	4.86412	5.0695	4.96252	4.99349	4.82886	4.78261	4.90063	4.94434	4.92236	4.96926	4.86962	4.75319	4.87777	4.98791	4.72303	4.79144	4.88051	4.95022	4.89063	4.9372	4.81232	4.85109
ADAM32	0.502559	-1.0734	-0.426331	-0.238453	3.03545	2.84864	1.77584	8.71143	6.54514	1.12659	3.346	1.27728	0.631686	3.37205	2.73945	5.1831	3.0122	2.43506	1.93379	-2.3617	1.99812	3.2946	1.90459	0.146014	4.92879	4.8872	4.91211	4.92632	5.01858	4.99135	4.99414	5.28674	5.22276	4.95533	5.02922	4.95591	4.93488	5.01773	5.01569	5.07843	5.01296	4.99346	4.97749	4.82869	4.99826	5.02802	4.99156	4.93036
ADAM33	1.13034	2.64756	5.32138	0.797845	3.64713	5.13734	4.67684	1.41495	8.87794	0.211002	5.541	3.2043	2.12718	5.37298	1.55659	-0.135566	1.28696	3.15195	-0.321681	0.840701	2.73566	0.964347	0.435416	4.12376	4.95141	5.00556	5.09662	4.95901	5.03657	5.04314	5.09489	4.99266	5.35371	4.92776	5.09466	5.01305	4.9816	5.07694	4.97914	4.92258	4.95954	5.01547	4.90573	4.93535	5.02141	4.95354	4.9434	5.05025
ADAM3A	0.391724	-0.139329	2.00357	-0.658509	-4.51366	-4.00249	-1.87331	0.608247	-0.902488	-3.97191	1.10171	-4.39097	0.0769045	0.927255	-0.410133	0.506247	1.66362	2.78379	-1.00011	0.987402	-1.08524	-0.0996989	-1.7752	-3.00841	4.92518	4.91723	4.99156	4.9122	4.78241	4.81718	4.86573	4.9615	4.89155	4.8017	4.96084	4.77337	4.91751	4.94213	4.91953	4.94148	4.97172	5.00356	4.88428	4.94026	4.89845	4.92144	4.87206	4.83219
ADAM5P	-10.1519	-0.360127	-0.946793	1.10182	-9.23085	-3.59705	-2.31905	2.23147	-3.62869	-3.56117	-0.521934	-1.4377	-3.05356	-4.12571	2.93662	-5.82114	-2.92503	2.96473	-0.93149	-2.84301	-1.41757	-6.92538	-3.98429	-1.75687	4.5707	4.91072	4.89531	4.96846	4.63454	4.8285	4.85115	5.02415	4.78834	4.81295	4.91226	4.87104	4.8194	4.77866	5.02276	4.7423	4.82454	5.00992	4.88657	4.81185	4.88729	4.70965	4.79902	4.86979
ADAM6	3.40351	7.7408	5.41289	3.07318	-0.529021	5.67673	-0.221924	3.4594	9.88426	1.84655	2.17711	-0.134543	2.38901	6.98323	0.936142	3.6581	0.894051	0.507084	1.26198	12.1291	2.8728	5.57683	1.45176	3.62831	5.02486	5.16483	5.09956	5.03165	4.90917	5.05452	4.92532	5.07177	5.41549	4.9766	4.99276	4.91124	4.98931	5.12315	4.96073	5.03577	4.94715	4.93299	4.95591	5.32561	5.02651	5.09978	4.97653	5.03528
ADAM7	7.94065	-0.986553	-3.41132	9.28922	1.52681	1.30568	7.27689	2.27695	3.61567	7.5118	6.0733	1.56941	2.53013	1.32411	-0.87088	4.07352	-1.13665	2.27094	-1.13603	3.0108	3.76928	-0.210236	0.184546	5.13531	5.1704	4.88957	4.81538	5.23316	4.97227	4.95285	5.1892	5.02579	5.07413	5.14926	5.11219	4.96456	4.99399	4.95464	4.90515	5.04699	4.88459	4.98891	4.87993	5.01006	5.0551	4.91859	4.93471	5.08081
ADAM8	354.455	333.023	255.401	309.268	483.83	591.666	264.496	161.845	88.6079	308.637	386.773	273.455	267.298	328.894	319.568	323.836	284.167	251.189	289.313	378.274	204.619	481.314	205.375	274.336	8.31826	8.25433	7.93951	8.23607	8.69818	8.64297	8.33642	7.95747	7.44707	8.15918	8.45589	8.00231	7.94918	8.27512	8.30228	8.26658	8.12554	8.00569	8.16385	8.97368	8.04279	8.94171	8.2336	8.15404
ADAM9	34.098	33.1654	34.1273	36.5311	29.6193	79.2248	50.4031	35.1433	35.5905	34.2953	44.1357	28.6026	32.9087	29.4026	36.36	36.763	37.5879	31.1483	29.4757	50.7741	39.8101	39.0111	52.5402	47.1993	5.81666	5.80161	5.86381	5.92767	5.69279	6.20413	6.32774	6.19877	6.39782	5.80812	6.00135	5.62716	5.7235	5.65119	5.85011	5.79635	5.83771	5.7368	5.69057	6.356	6.09655	5.94207	6.46405	6.11709
ADAMDEC1	1.24807	-0.680908	2.6874	-1.60181	-2.79953	-0.270188	-1.8371	-0.362028	-3.37762	-1.48878	-1.14254	-1.80287	2.00517	-1.71398	-2.89803	4.33237	-0.419121	-0.983196	3.03615	-0.665818	-1.82086	-0.633694	-1.8862	0.818352	4.95523	4.90081	5.0129	4.88246	4.83705	4.91378	4.86697	4.92335	4.79714	4.87708	4.89417	4.85892	4.97742	4.85497	4.84168	5.05488	4.90581	4.88493	5.01145	4.88645	4.87413	4.90523	4.86776	4.95092
ADAMTS1	210.969	199.141	178.237	178.661	239.641	269.858	130.196	55.5156	210.203	183.727	102.385	38.8194	37.4032	43.1108	41.7626	99.6454	52.1967	36.6483	49.2683	62.0251	30.927	78.7393	26.0727	82.0406	7.67055	7.60723	7.49849	7.54313	7.79208	7.62734	7.44116	6.64031	8.4729	7.47362	6.77054	5.82393	5.80843	5.92738	5.95171	6.6784	6.09216	5.85148	6.06731	6.56481	5.9059	6.59006	5.83181	6.63778
ADAMTS10	0.291095	8.2929	0.646003	0.209459	1.71843	-1.79006	-1.88109	-1.42776	-5.3945	-4.31743	1.53797	4.83255	2.40487	-1.78135	0.489976	2.50054	6.14642	2.61082	2.33148	-0.763051	-4.89669	-4.27834	-0.95347	-1.52738	4.92107	5.1824	4.94569	4.94089	4.9779	4.875	4.86559	4.88252	4.72018	4.79184	4.9738	5.06079	4.98995	4.85259	4.94718	5.00228	5.10209	4.99829	4.99135	4.88276	4.77649	4.79463	4.89757	4.87769
ADAMTS12	-1.09812	-4.13185	-0.328377	-6.86255	-1.04032	3.70021	-2.27276	1.38875	-9.28724	7.60744	-4.86529	1.3374	1.79909	-0.17786	-4.99034	-4.78573	7.87125	-4.91957	-1.2005	2.67268	-4.94238	-3.1295	-3.16987	-5.21879	4.87297	4.78824	4.91547	4.71428	4.89243	5.01165	4.85278	4.99187	4.58265	5.15233	4.77738	4.95764	4.97085	4.90621	4.7761	4.77533	5.15241	4.7569	4.87798	4.99837	4.775	4.82854	4.82732	4.76291
ADAMTS13	0.429009	-1.01176	1.82413	-3.46825	0.928328	-1.95966	2.30239	-0.739582	1.96275	-2.58481	3.30021	1.03338	1.82026	0.0339216	0.441208	2.2491	4.31087	-1.09408	0.362208	1.02489	-0.243768	-1.15382	0.222166	-0.478666	4.92652	4.88881	4.98585	4.82206	4.95424	4.87119	5.01269	4.90834	5.0038	4.84365	5.02802	4.94827	4.97144	4.91255	4.94542	4.99479	5.05195	4.88159	4.92755	4.94138	4.92562	4.88913	4.93628	4.91048
ADAMTS14	0.265342	-3.30217	1.04707	-0.0949808	-5.19254	-2.80255	-1.31334	-6.69906	0.275408	-4.64003	-1.70314	-2.74262	-0.967555	-3.32908	-2.78204	-3.07157	1.39059	-0.92107	-1.21129	-2.51768	0.362713	-2.33958	4.90194	-3.61768	4.92004	4.81553	4.95983	4.93144	4.76025	4.8495	4.8859	4.68953	4.93893	4.78228	4.87672	4.82916	4.88505	4.80164	4.84516	4.82921	4.96326	4.88712	4.87761	4.8231	4.94514	4.85223	5.09642	4.8139
ADAMTS15	8.36463	24.9199	6.99554	1.15364	8.84857	9.67318	5.87593	5.23727	3.34151	3.68247	-3.3511	10.3941	5.00953	-3.81902	7.58344	5.57583	-0.0132064	0.611729	5.32631	1.94888	7.01726	3.31129	6.08559	2.25771	5.18147	5.62273	5.14859	4.96999	5.18543	5.14228	5.1347	5.14201	5.06191	5.03251	4.8254	5.21333	5.06925	4.78834	5.15802	5.09001	4.91893	4.93716	5.08148	4.97415	5.16781	5.02869	5.13812	4.99342
ADAMTS16	-5.59123	2.6541	8.12036	-6.71896	-1.59995	2.62407	-9.35647	1.27179	2.83254	-6.95358	-7.32379	-3.48234	-1.39855	-6.16049	-0.3423	-2.8276	-0.471901	4.41776	-0.982935	5.77285	-4.23218	-1.7271	-2.14401	0.9739	4.72032	5.00563	5.18222	4.71904	4.87478	4.98601	4.61529	4.98723	5.03925	4.70672	4.69846	4.8045	4.87166	4.71168	4.92197	4.83705	4.90435	5.05586	4.88468	5.10361	4.79621	4.87154	4.85924	4.95575
ADAMTS17	2.34657	0.877811	-0.449852	4.64573	11.7413	-2.21601	4.95522	2.22189	10.0909	4.84821	5.37943	6.54732	2.90851	1.09803	5.91044	4.33382	17.5093	6.25571	7.1759	5.32189	6.20745	-3.58199	4.26811	2.09234	4.99035	4.95045	4.91136	5.08355	5.26758	4.86503	5.1038	5.0239	5.4259	5.06838	5.09036	5.10844	5.00556	4.94768	5.11092	5.05498	5.40225	5.11287	5.13219	5.08868	5.13852	4.81453	5.07478	4.98876
ADAMTS18	-0.511235	-4.17575	3.33635	-2.62103	-3.76515	-0.36274	6.68007	0.367648	0.481352	-1.96846	-1.57988	0.25548	-1.40397	-4.80163	-2.54755	-2.31992	-0.251922	-0.0868225	0.766015	3.23072	-3.98628	-2.3434	-0.746927	-0.340527	4.8941	4.78713	5.03262	4.84922	4.80652	4.91124	5.16657	4.95219	4.94664	4.86246	4.88059	4.92301	4.87139	4.75767	4.85298	4.85278	4.91072	4.91376	4.94047	5.01742	4.80366	4.85194	4.90487	4.91491
ADAMTS19	-2.22619	-2.51596	-6.20929	3.30774	-0.94438	-10.7535	-2.70782	-3.35275	-0.178026	5.70966	-1.56124	-6.37584	-3.86389	-8.39783	-2.35235	-2.48717	4.56493	-2.79258	-1.28964	-0.0424014	-2.35608	-0.614739	-4.33718	-3.15097	4.83404	4.84073	4.72226	5.03886	4.89583	4.6358	4.83814	4.81207	4.9199	5.09565	4.88125	4.70829	4.79286	4.63896	4.8592	4.84804	5.05878	4.82593	4.87513	4.90627	4.85752	4.90581	4.78581	4.8282
ADAMTS2	-2.34299	1.04898	-3.23721	-1.26095	-2.87785	0.0175966	-2.40004	-0.902307	-1.20096	0.747017	3.62689	0.312696	0.918893	-2.24735	1.0783	-0.832358	-0.327721	-2.96928	0.264234	3.97297	-1.36631	0.0262561	-1.13303	1.11516	4.82958	4.95636	4.82156	4.89401	4.83481	4.92121	4.84817	4.90173	4.87937	4.94503	5.03838	4.92471	4.94414	4.83799	4.9647	4.90075	4.90873	4.82078	4.92402	5.04354	4.88913	4.92521	4.89227	4.96018
ADAMTS20	-2.74292	-1.52485	-0.441433	-2.27551	-5.78377	-4.87777	-4.44857	-6.40086	-1.17284	-5.29963	-1.10666	-0.977739	-4.30377	-0.3834	-4.45307	-4.74057	-2.79811	-0.721497	-1.4384	-1.97539	-2.25238	-5.86546	-2.62304	-1.40609	4.81806	4.87289	4.9116	4.86152	4.74282	4.79268	4.77643	4.69822	4.88079	4.76074	4.89535	4.88535	4.78004	4.89966	4.79238	4.77649	4.82875	4.8924	4.87053	4.84201	4.86114	4.74467	4.84497	4.88159
ADAMTS3	6.76997	2.35911	-1.55733	8.30589	2.29647	-1.02353	2.02489	9.24012	0.583883	3.74576	0.386551	0.871935	2.01703	2.02015	-3.05305	4.43485	4.75124	0.544903	3.89429	1.57027	6.74482	3.14904	5.0591	6.28841	5.13514	4.99638	4.877	5.20088	4.9953	4.89384	5.00228	5.30975	4.9506	5.03466	4.94018	4.94265	4.97802	4.97522	4.83644	5.05798	5.06456	4.93444	5.03813	4.96091	5.15736	5.02351	5.10243	5.11424
ADAMTS4	7.79921	-1.49495	15.1572	2.40769	5.38045	2.52375	3.66129	5.83809	-0.693857	1.86356	7.6787	10.6073	0.64742	7.08106	4.44198	-0.92401	4.25237	6.61988	-0.117129	-2.23498	0.606541	2.75123	3.60194	2.59235	5.16681	4.87407	5.3954	5.01074	5.08511	4.984	5.0594	5.16535	4.90016	4.97703	5.16032	5.21907	4.93546	5.12635	5.06577	4.89787	5.05031	5.12229	4.9122	4.83282	4.95314	5.0109	5.05239	5.00325
ADAMTS5	-0.267575	-1.36405	-0.107575	-1.9443	-7.26482	-4.68626	-1.21623	-4.83631	-0.884432	-4.70316	-2.13647	-4.98942	-1.31143	5.65126	-0.348968	1.17204	0.955872	6.40687	3.0982	2.69467	-4.32881	2.95266	-0.958307	3.50606	4.90248	4.87858	4.92308	4.87194	4.69898	4.7978	4.8898	4.7569	4.8922	4.77971	4.86355	4.75479	4.87447	5.0853	4.92173	4.96315	4.94963	5.11703	5.01353	4.99939	4.7921	5.01715	4.89746	5.03162
ADAMTS6	64.2555	42.33	40.6501	43.6676	51.2135	136.058	102.427	44.2634	22.7376	41.6466	55.0798	19.2477	12.3867	17.2564	16.3655	25.7481	23.1286	26.7305	38.7577	60.0983	23.7638	66.8934	33.7631	22.5165	6.32003	5.98568	5.99743	6.06652	6.09947	6.72761	7.10996	6.40515	6.00915	5.95171	6.1736	5.42313	5.271	5.38957	5.39188	5.56404	5.53366	5.63821	5.87837	6.53044	5.70494	6.41376	6.05163	5.5853
ADAMTS7	2.98661	-1.16871	3.2302	1.50804	1.13688	-3.96662	-0.797809	-1.01641	0.741529	-2.4986	3.63234	1.88474	-3.6263	-0.94751	3.76836	-0.882571	1.67248	-1.9045	-3.23373	-0.499929	1.8195	-1.56466	1.61579	2.84919	5.0112	4.88459	5.0296	4.98196	4.96081	4.81789	4.90435	4.8977	4.95636	4.84613	5.03862	4.97412	4.80059	4.88067	5.04584	4.89921	4.97207	4.85556	4.81207	4.89143	4.99285	4.87704	4.98207	5.01193
ADAMTS8	9.20909	8.09141	4.22194	1.23543	4.09743	7.04586	0.0441896	-1.01036	3.13946	5.60638	9.12788	4.35208	7.43573	11.1601	-0.365013	3.49305	9.53346	8.28849	-3.64318	6.85576	3.95852	0.919189	6.24222	7.73809	5.20671	5.17658	5.06175	4.97286	5.04818	5.08504	4.93466	4.89775	5.05316	5.09261	5.20322	5.04669	5.13589	5.23449	4.92115	5.03153	5.19869	5.16882	4.80034	5.14182	5.06121	4.95246	5.14228	5.15751
ADAMTS9	2.16074	3.8727	-1.57063	-4.287	-4.95917	-3.63858	-4.65756	-1.11913	-4.07834	-4.99471	-0.898338	1.38098	4.98897	0.230167	-7.93323	1.61361	-1.66221	-1.8077	-1.73445	-0.947721	-3.58716	-1.60938	-4.73613	-3.24284	4.98466	5.0435	4.87672	4.79406	4.76865	4.82705	4.76907	4.89449	4.7695	4.76962	4.90114	4.95886	5.06819	4.91976	4.67703	4.97627	4.86828	4.85897	4.86108	4.87669	4.8174	4.8756	4.77151	4.82524
ADAMTSL1	0.299735	-2.53826	-3.19576	0.296535	1.56746	3.58429	-1.98594	0.104222	0.0370448	-2.04465	-1.12788	-2.0969	0.290076	-0.755622	-1.58306	-0.698359	-1.19842	1.45442	-1.84207	0.28454	-1.16736	-0.480321	-1.34252	-0.0923294	4.92137	4.84007	4.82276	4.9436	4.97361	5.00879	4.86227	4.94175	4.92865	4.86002	4.89462	4.84896	4.9236	4.88716	4.88246	4.90499	4.88288	4.9636	4.8576	4.91732	4.89561	4.91048	4.88594	4.92318
ADAMTSL2	7.32558	-4.23878	-0.545799	7.56229	-0.549712	-1.42497	-7.98142	5.14293	3.14852	-3.47633	-3.82666	3.54006	-4.33064	-3.52052	-5.41376	-2.42458	6.19531	-0.716007	-1.44599	0.591609	-3.66734	-7.38492	-10.2653	0.70578	5.15044	4.78465	4.90852	5.17692	4.90831	4.88415	4.65365	5.13877	5.05353	4.81579	4.80923	5.02211	4.77928	4.79575	4.76274	4.84982	5.10349	4.89251	4.87027	4.92745	4.81453	4.69609	4.57677	4.9481
ADAMTSL3	17.8248	11.5749	16.7889	7.87844	21.5838	18.7398	1.15529	1.3569	0.915647	17.2998	4.3698	16.6861	21.7214	0.680439	5.80946	4.2795	10.479	8.73417	7.69372	7.32006	0.415081	4.25562	2.5717	5.37335	5.44737	5.27878	5.4384	5.18754	5.52031	5.32741	4.9721	4.99067	4.96339	5.4186	5.06104	5.36358	5.48853	4.93456	5.10746	5.05349	5.2222	5.18165	5.14657	5.15721	4.94677	5.05833	5.01552	5.08815
ADAMTSL4	14.4897	14.3331	13.3989	13.2509	10.8214	20.5495	8.61488	2.8229	5.50005	10.914	9.57566	8.13171	12.541	5.25893	5.66716	3.14187	6.22489	8.45908	8.66308	10.5404	25.0178	11.3376	23.6833	21.4744	5.36005	5.35732	5.34589	5.36105	5.24162	5.36023	5.23628	5.04718	5.16332	5.2505	5.21708	5.15335	5.27413	5.07376	5.10349	5.02156	5.10416	5.17329	5.17444	5.26883	5.73925	5.27662	5.76869	5.55896
ADAMTSL5	74.0833	77.4828	73.8638	79.5168	85.0096	92.7162	76.8553	70.7888	65.4052	59.1464	61.0407	90.8423	78.3919	62.9714	105.178	106.356	67.7355	51.2869	64.1414	53.2796	33.3661	43.6901	41.8391	45.7777	6.44597	6.50447	6.49558	6.59201	6.55232	6.35395	6.7667	6.9049	7.06839	6.23714	6.26631	6.5799	6.42784	6.23857	6.83168	6.75173	6.31961	6.12212	6.29741	6.40843	5.9604	6.03509	6.23604	6.08929
ADAP1	229.056	196.058	215.564	206.996	255.589	231.925	134.922	67.1162	57.8394	151.206	110.079	148.088	143.827	153.7	212.316	200.534	131.04	124.542	110.137	92.3902	72.7807	123.681	65.122	89.1087	7.76587	7.58832	7.7229	7.73046	7.86884	7.41497	7.48144	6.84361	6.90994	7.23417	6.84193	7.15384	7.11104	7.23363	7.75919	7.60134	7.04758	7.05333	6.87613	7.03245	6.68461	7.10753	6.69126	6.71878
ADAP2	11.8323	10.1472	10.1239	10.233	15.0936	17.8695	8.04656	7.41333	5.55594	7.93775	5.70757	12.6643	15.9993	20.5491	12.8843	18.8782	21.285	12.9501	12.0401	14.6733	9.10826	6.23875	8.10704	8.26069	5.28159	5.23606	5.2478	5.25938	5.35702	5.31006	5.2158	5.23245	5.16647	5.16195	5.09985	5.26508	5.35767	5.46284	5.3028	5.41449	5.49239	5.30253	5.26668	5.41248	5.23916	5.12134	5.21121	5.17356
ADAR	707.982	718.816	621.273	621.344	700.63	772.817	372.133	253.794	153.45	657.219	682.922	529.451	511.991	567.074	530.675	574.452	562.458	502.056	589.386	444.302	650.202	684.226	516.679	608.188	9.23645	9.26918	9.05344	9.15576	9.20263	9.0167	8.80331	8.55976	8.09461	9.16541	9.20361	8.91743	8.8423	9.02655	9.02866	9.0789	9.07194	8.93831	9.16199	9.198	9.61839	9.46302	9.5293	9.19387
ADARB1	73.7547	67.466	64.758	64.5309	64.5871	73.3049	35.951	15.7196	10.5731	59.3538	51.4228	54.7969	53.5759	52.8328	56.0441	63.4007	49.0393	48.2732	53.674	51.728	55.8409	70.5906	57.0037	45.2106	6.44004	6.38077	6.3842	6.41236	6.28777	6.13831	6.04776	5.59334	5.4505	6.24047	6.11867	6.09803	6.08083	6.08045	6.20143	6.22311	6.03846	6.06879	6.13505	6.37812	6.40807	6.46719	6.54117	6.07629
ADARB2	-1.64319	2.2935	0.797188	2.47383	-0.822028	-4.11267	2.45302	0.247099	-3.05841	-10.7787	0.403496	0.707476	-1.93003	-0.415249	-1.6262	-5.82809	-1.87328	5.09821	3.0592	3.41965	-1.57146	-5.4095	0.419867	1.84253	4.8542	4.99404	4.9506	5.01269	4.89914	4.81442	5.01691	4.94774	4.80781	4.55512	4.94072	4.93788	4.85478	4.89845	4.88125	4.74178	4.86114	5.07659	5.01242	5.02355	4.88244	4.75832	4.94287	4.98155
ADAT1	347.125	346.543	309.937	289.815	340.147	402.668	157.021	110.875	43.3285	342.888	351.657	450.79	338.818	347.272	321.098	362.706	343.102	292.68	259.729	233.132	238.815	325.856	245.335	263.913	8.29281	8.30466	8.16932	8.15343	8.2472	8.14192	7.66954	7.48224	6.59543	8.28385	8.33473	8.69308	8.27308	8.35264	8.308	8.41928	8.37317	8.20719	8.02145	8.28577	8.24408	8.40905	8.47863	8.09796
ADAT2	10.8375	20.3168	18.2862	16.2226	17.403	12.7116	3.33724	0.334631	1.31	6.61182	22.0203	16.7443	9.93317	13.8479	14.8984	9.84056	7.12707	3.74929	14.7365	18.2132	13.3317	15.1001	16.066	14.5517	5.25425	5.51697	5.48493	5.44817	5.41773	5.20366	5.04736	4.95077	4.97818	5.12067	5.55112	5.36463	5.20159	5.30502	5.35288	5.20003	5.13093	5.03493	5.33534	5.53164	5.38257	5.38664	5.49785	5.36945
ADAT3	21.5597	20.0813	11.6087	20.1479	31.8639	40.4703	35.1967	39.1002	32.01	23.7741	22.6956	14.7145	14.5198	11.8447	30.1233	24.1051	14.7025	18.4346	23.3975	13.6978	21.5839	30.0802	18.3583	22.6706	5.53436	5.51076	5.29338	5.54868	5.74699	5.70706	6.03416	6.28695	6.29683	5.58217	5.5678	5.31537	5.32186	5.2511	5.72272	5.53072	5.33364	5.44621	5.55087	5.38062	5.63856	5.75653	5.58404	5.58816
ADC	-2.67392	-0.712276	-2.03887	-3.57105	1.8061	-0.675236	-2.27693	11.2156	15.0229	6.86317	5.07071	9.53404	7.42821	5.03291	5.91477	8.65228	6.91915	11.5444	7.59115	5.93067	10.6804	0.179107	-0.933687	8.4277	4.82044	4.89959	4.86201	4.81839	4.98046	4.90291	4.8525	5.39241	5.67387	5.1285	5.08061	5.19196	5.13568	5.06605	5.11099	5.17137	5.12484	5.26222	5.14349	5.1087	5.29242	4.92946	4.89813	5.1786
ADCK1	89.4226	86.1983	88.6034	68.5149	79.5383	84.3777	52.4371	27.8932	16.4265	83.2404	62.1154	85.1728	91.9113	79.0297	89.7431	84.1205	81.1948	76.2203	76.7472	67.9504	76.0448	69.663	71.7558	79.1908	6.62319	6.60298	6.66604	6.46004	6.48372	6.26278	6.36788	5.99279	5.74238	6.54803	6.28188	6.51067	6.58978	6.45236	6.65296	6.49455	6.49886	6.48629	6.47464	6.66415	6.73761	6.45562	6.81026	6.59901
ADCK2	546.005	630.226	574.539	568.784	559.874	750.179	517.18	408.415	348.105	646.785	627.845	494.446	327.04	421.989	395.948	397.435	496.447	463.164	441.981	312.69	498.204	514.652	388.71	837.131	8.88525	9.09261	8.95221	9.03252	8.90313	8.97516	9.20851	9.15775	9.11007	9.14768	9.09927	8.80934	8.22987	8.62311	8.58741	8.5476	8.89019	8.82034	8.75793	8.70508	9.2424	9.04089	9.12677	9.66388
ADCK4	50.3822	52.1002	55.2029	55.4736	65.923	94.6881	60.7298	49.6016	47.0928	51.6634	51.9913	105.167	102.13	87.1782	106.874	107.365	82.0648	76.736	76.1745	50.2571	97.1297	70.3552	92.0742	70.4308	6.11709	6.15396	6.2585	6.2763	6.30787	6.36977	6.51418	6.52356	6.67184	6.11984	6.1324	6.73858	6.70012	6.54966	6.84913	6.767	6.51418	6.49292	6.4649	6.34543	7.05613	6.46454	7.14471	6.48273
ADCK5	75.4162	64.0303	57.7035	59.6036	83.0686	109.706	73.3203	51.4489	21.8803	70.2139	78.1146	101.581	92.6454	95.7726	121.041	121.804	83.5885	95.0188	89.623	83.996	120.372	120.509	114.23	84.2483	6.46378	6.34098	6.29095	6.34098	6.52684	6.50615	6.71056	6.56287	5.98058	6.39164	6.49205	6.69898	6.59807	6.65155	7.00404	6.92304	6.53508	6.71878	6.64276	6.92549	7.33152	7.0701	7.45286	6.6633
ADCY1	55.6617	47.8591	30.9352	34.3287	37.4496	18.8171	6.67292	7.25397	3.77628	63.3977	54.0503	32.3895	27.1552	20.4287	20.3261	33.8961	27.2617	37.8028	41.7545	33.4671	26.3988	52.3683	24.4971	29.629	6.19838	6.08438	5.78594	5.87945	5.87128	5.32953	5.16597	5.2253	5.08166	6.29847	6.15918	5.7076	5.61066	5.46075	5.48675	5.74336	5.62733	5.87062	5.93406	5.97228	5.77672	6.19763	5.79231	5.75956
ADCY10	5.40608	2.58702	3.59798	6.52543	-1.61884	-0.982472	0.137825	3.09312	3.37046	1.56217	1.07428	4.76274	-0.658412	10.0881	0.648713	1.5702	0.0844727	-1.35392	5.92521	-0.894528	-1.98489	0.580703	2.34395	0.546463	5.09217	5.00389	5.04132	5.14557	4.8741	4.8947	4.9375	5.05748	5.06307	4.9683	4.9601	5.05926	4.89538	5.20591	4.95179	4.97506	4.92155	4.87344	5.09921	4.87854	4.86938	4.94226	5.0062	4.94308
ADCY2	-3.23721	-2.60856	-0.677841	3.72522	-1.7625	2.37727	-0.137352	-0.160837	4.47953	4.22451	4.50878	0.283396	1.69031	-1.51422	-0.918083	0.279023	3.74229	-0.0628395	1.39837	-1.63393	4.1968	5.7794	4.53089	-0.188744	4.80001	4.83716	4.90389	5.05321	4.87004	4.98055	4.92847	4.93144	5.11384	5.04874	5.06552	4.92399	4.9674	4.86146	4.90365	4.9346	5.03389	4.91421	4.95997	4.85302	5.06838	5.10606	5.08355	4.91982
ADCY3	1435.37	1355.9	1408.77	1425.62	1398.48	1446.27	680.676	342.406	278.288	1604.26	1609.89	1482.65	1342.58	1280.08	1165.49	1243.69	1377.17	1217.71	1248.9	1173.44	1274.39	1513.43	1201.68	1989.83	10.1931	10.1507	10.1737	10.3078	10.1752	9.89404	9.60197	8.9208	8.82659	10.3952	10.4231	10.4231	10.2676	10.2591	10.1684	10.2897	10.4326	10.2392	10.3156	10.6328	10.5443	10.647	10.6972	10.8782
ADCY4	-0.413197	1.1901	1.90676	-2.65156	-2.13672	1.13923	3.9193	2.48637	-8.34919	-3.6805	3.93594	-0.941176	-2.09317	1.97287	7.47063	0.994363	-3.52033	0.599842	0.947408	-3.51296	3.47941	-1.51222	-2.72545	0.365997	4.89757	4.96035	4.98872	4.8477	4.85665	4.9492	5.06819	5.03378	4.61917	4.80932	5.0477	4.8869	4.84966	4.9738	5.15514	4.9574	4.80339	4.93678	4.94613	4.78819	5.0459	4.87863	4.84131	4.93716
ADCY5	6.58572	3.53889	4.88157	-2.49032	3.24259	1.96946	0.665344	5.80227	2.98456	-4.04459	3.51131	-4.51551	1.20777	-3.04705	2.29084	2.60969	4.59885	0.292912	-1.0498	-0.636373	-3.77652	0.393432	5.13357	4.08205	5.12924	5.03114	5.08292	4.85394	5.02436	4.97011	4.95569	5.16322	5.0462	4.79958	5.03439	4.76962	4.95297	4.81001	5.00093	5.00508	5.05987	4.92569	4.88237	4.8872	4.81141	4.93621	5.10505	5.04927
ADCY6	33.7195	29.1077	21.7806	20.3517	31.8663	40.891	14.8546	13.5545	7.42522	38.596	34.416	105.811	102.382	89.2649	96.4651	78.5786	83.6642	78.4606	71.8177	75.934	75.15	78.9589	89.0435	76.7032	5.81121	5.71609	5.58064	5.55447	5.74765	5.71391	5.46284	5.49803	5.27135	5.89836	5.81717	6.74541	6.70164	6.57723	6.73731	6.43317	6.5364	6.51665	6.40378	6.79746	6.72249	6.59331	7.09737	6.56875
ADCY7	122.67	129.942	117.144	103.053	173.215	230.174	221.985	197.764	111.561	100.123	118.303	148.796	123.95	137.838	119.867	133.674	117.215	92.6361	94.0424	98.0464	138.911	129.291	122.277	141.857	6.9669	7.0444	6.97695	6.85613	7.37357	7.40334	8.1027	8.20811	7.71247	6.72998	6.92189	7.16234	6.92223	7.07308	6.99052	7.04031	6.91152	6.69291	6.69176	7.11492	7.52552	7.1637	7.53672	7.28047
ADCY8	4.30291	-0.337704	-0.669228	1.62944	-0.678122	3.80332	3.99618	2.89435	4.9939	2.00427	0.552895	-1.42913	2.66845	1.02735	1.10726	-0.290503	-1.45698	5.50968	0.0708822	2.63079	1.14613	4.47102	-0.247492	3.00205	5.05638	4.91156	4.90408	4.98596	4.90402	5.01409	5.07093	5.05	5.13621	4.98068	4.94477	4.87126	4.99859	4.94531	4.96569	4.91754	4.87552	5.08889	4.91831	4.99697	4.97116	5.06522	4.92027	5.01674
ADCY9	76.1576	68.5927	52.872	64.2888	62.343	46.7243	7.96233	5.44923	5.5086	55.7262	58.3247	65.476	62.6424	50.5511	41.3758	50.8363	47.2341	40.0898	52.6963	39.6638	37.8889	44.4105	39.2203	75.6581	6.47353	6.39657	6.2156	6.40731	6.25938	5.81071	5.21274	5.15	5.16382	6.18421	6.22574	6.25735	6.21945	6.03943	5.94346	6.02823	6.01014	5.91428	6.11867	6.1248	6.05972	6.0481	6.17574	6.55398
ADCYAP1	-0.447804	1.67595	1.93983	-3.70959	2.44192	-6.17651	-0.782242	-0.233491	0.912481	-6.76276	-3.45445	-3.78313	-3.2349	-1.54936	-0.76863	-1.87962	-8.43742	-5.42685	-0.739161	-5.58657	-3.81905	-0.453576	-6.26038	-7.30226	4.89632	4.97497	4.98985	4.81385	5.00013	4.75642	4.90499	4.92839	4.96326	4.7132	4.82156	4.79354	4.81302	4.86054	4.90865	4.86757	4.64585	4.73852	4.89227	4.71428	4.80978	4.91113	4.72288	4.70157
ADCYAP1R1	0.948307	5.63575	-0.273194	-2.48753	-1.32442	-1.48714	-2.22872	-7.46631	-0.766527	0.43724	-2.34676	-0.897146	1.7057	-0.114071	-1.35229	-6.31572	1.70514	-0.629459	-2.81079	0.193568	-1.23328	1.65098	-3.29447	-1.28988	4.94449	5.09791	4.91707	4.85412	4.88362	4.88309	4.8542	4.66649	4.8974	4.93451	4.85696	4.88812	4.96772	4.90848	4.88969	4.72729	4.97301	4.89566	4.82569	4.91392	4.89339	4.97568	4.82317	4.88521
ADD1	486.087	421.997	432.992	437.575	439.818	535.392	327.227	241.038	230.17	408.945	375.29	409	475.947	414.827	460.201	437.954	386.591	368.018	478.335	234.442	255.616	349.712	206.879	281.523	8.73043	8.55523	8.58741	8.6858	8.58042	8.51301	8.61976	8.48277	8.59569	8.5338	8.41115	8.55272	8.72777	8.59475	8.81317	8.6967	8.54949	8.5103	8.86586	8.29425	8.32345	8.50193	8.24501	8.18347
ADD2	0.566604	2.19217	0.253595	-0.783949	-0.690981	0.246213	-0.450458	-0.837131	-1.69876	1.52838	0.0591395	0.473261	0.968244	0.701145	-1.57979	3.15454	1.88003	4.38059	-0.577103	0.671761	1.15101	1.77416	0.900997	-1.02415	4.93091	4.99107	4.93424	4.90834	4.90346	4.92718	4.91699	4.90445	4.85905	4.9674	4.93046	4.93033	4.94565	4.93506	4.88252	5.02183	4.97862	5.05493	4.8976	4.92992	4.97144	4.9796	4.95822	4.8933
ADD3	47.1565	41.3088	42.1173	44.6776	47.3981	64.3876	31.504	38.9962	37.9821	46.0884	55.0903	72.2832	72.0597	67.0406	52.7796	57.6588	67.8491	59.9147	61.0578	39.2363	47.9858	59.3512	47.2986	54.0726	6.06431	5.9651	6.02861	6.09216	6.03745	6.0388	5.94937	6.28388	6.46378	6.03027	6.1739	6.34276	6.34276	6.29913	6.14373	6.13625	6.32135	6.26478	6.24791	6.11464	6.26358	6.30609	6.36109	6.232
ADH1A	2.11166	2.93822	0.00206735	2.31678	-3.54787	2.00705	0.154595	3.80423	-1.28976	2.06587	-2.41415	6.81159	2.20203	-0.63969	0.600831	0.122605	-0.474846	1.48574	0.765775	6.86173	2.76567	-2.85204	0.501181	1.08939	4.98307	5.01471	4.92699	5.00808	4.81358	4.97101	4.93816	5.0845	4.87582	4.98254	4.85486	5.11731	4.98381	4.89143	4.95012	4.93004	4.90412	4.96444	4.94044	5.14208	5.02225	4.83768	4.94561	4.95944
ADH1B	-1.92378	-0.915493	-3.72667	-1.43557	-3.11272	-5.96592	-2.97604	-6.94508	1.38751	-3.3252	-1.22074	-4.92345	-4.98424	-6.68016	1.53985	-2.01186	0.620064	-2.0029	-0.121195	-0.471311	3.86216	-2.82847	-0.715891	-4.3456	4.84499	4.8922	4.80529	4.88789	4.82741	4.76218	4.82881	4.6825	4.98087	4.82006	4.89168	4.75669	4.75446	4.69392	4.97862	4.86307	4.93829	4.85278	4.91197	4.89236	5.05798	4.8381	4.90609	4.79079
ADH1C	-2.24799	-3.19386	-4.29848	0.525857	-1.50699	-1.78831	2.34809	6.00302	1.49988	-1.15683	-0.0485838	-3.79571	3.92046	-3.79133	1.04034	-7.39156	-3.3815	-3.64531	-1.57228	3.81899	-1.82038	-6.50257	-0.0767686	-1.58176	4.83343	4.81872	4.7866	4.95117	4.87806	4.87513	5.01392	5.17183	4.98552	4.88739	4.92702	4.79318	5.03708	4.78916	4.96364	4.68791	4.80864	4.79741	4.86662	5.03813	4.8742	4.72288	4.92606	4.87568
ADH4	-1.63296	-1.1884	-1.40726	2.54646	-0.839911	9.59482	4.05055	-1.56426	1.84756	2.85571	5.24271	2.26478	3.82894	2.04608	10.1788	3.97788	3.70032	4.74916	4.57005	10.2604	0.111614	5.59299	5.05593	2.11805	4.8544	4.88377	4.88099	5.01533	4.89861	5.14058	5.07266	4.87708	4.99925	5.00781	5.08593	4.98593	5.03392	4.97631	5.23224	5.04412	5.03293	5.06639	5.05987	5.25746	4.937	5.1004	5.10227	4.98937
ADH5	45.4073	51.5376	46.8987	37.5934	45.057	45.0259	14.8309	19.2316	8.12369	38.6048	44.3423	31.1946	32.9886	29.7993	37.1035	23.3837	37.6783	35.0876	26.3965	15.6316	20.7527	25.8382	23.4598	25.0278	6.02975	6.14248	6.11406	5.95171	5.99706	5.78354	5.46168	5.71833	5.31265	5.89862	6.00813	5.68422	5.72562	5.65688	5.86147	5.51513	5.83975	5.81823	5.62498	5.4438	5.61483	5.66219	5.76035	5.65119
ADH6	3.86273	5.21013	7.19404	7.98616	13.2106	5.81081	7.91024	3.4415	4.06689	13.1502	13.3378	8.1815	7.24438	-2.34987	2.08893	1.91863	5.74008	3.01085	10.1183	4.89389	2.84063	3.68282	1.1718	8.80093	5.04061	5.08485	5.15514	5.19041	5.30579	5.05725	5.21109	5.07107	5.0951	5.31265	5.322	5.15471	5.13093	4.8352	4.99475	4.98545	5.09188	5.01165	5.21481	5.07354	5.02504	5.04101	4.96765	5.1898
ADH7	0.962322	0.662243	-1.43343	3.96176	3.00462	-0.537709	-1.04188	-3.65143	3.76754	5.66911	2.93995	2.91872	4.36905	1.24813	5.3837	2.73045	-4.43467	7.21237	-3.82326	0.85171	2.92485	-6.52102	-2.42237	7.4225	4.9451	4.94333	4.88021	5.06133	5.01782	4.90654	4.89594	4.80059	5.0812	5.09435	5.01701	5.00414	5.05025	4.95214	5.09516	5.0086	4.77363	5.14051	4.7943	4.93561	5.02822	4.72198	4.85011	5.14886
ADHFE1	15.0846	6.72597	9.75995	8.29595	16.6433	29.8248	26.7401	20.6114	8.37107	12.5849	9.21044	58.9815	60.5535	59.3033	50.8968	52.6336	58.8989	50.2688	49.4832	34.1202	19.7357	17.7932	23.63	10.4226	5.37517	5.13204	5.23517	5.20024	5.39944	5.53095	5.83077	5.76324	5.32638	5.29684	5.20629	6.16636	6.18462	6.18559	6.11517	6.05734	6.19235	6.10152	6.07004	5.98785	5.57969	5.46329	5.76584	5.23928
ADI1	19.4071	20.447	31.3385	18.4713	27.5942	50.8359	25.5072	39.5045	43.9969	37.4706	30.1751	72.5992	64.5373	68.1644	88.1654	68.8933	52.425	48.2481	49.2901	26.8915	18.0847	22.1134	19.0145	46.4028	5.48493	5.51954	5.79669	5.50772	5.65153	5.86749	5.79694	6.29683	6.60775	5.87333	5.73122	6.34805	6.24402	6.31297	6.63183	6.30102	6.09527	6.0682	6.0677	5.80209	5.53436	5.57355	5.60908	6.09976
ADIG	-6.03127	-5.85539	-2.61694	-7.01777	-8.37753	-5.36445	3.0462	-5.92942	0.19187	-1.56617	-2.93134	-4.03101	-1.15809	-9.02345	-3.51073	1.0652	-1.5316	-2.14356	-2.04553	-2.9825	-0.819927	-7.38586	-2.35718	-1.39335	4.70333	4.73435	4.84233	4.70965	4.66344	4.77928	5.03751	4.71766	4.93506	4.87447	4.83832	4.78487	4.87933	4.62129	4.82307	4.95986	4.87304	4.84861	4.85058	4.80706	4.90712	4.69584	4.85237	4.88198
ADIPOQ	5.00458	10.1448	3.82661	0.980234	-1.35761	4.56347	3.73113	5.25143	3.98856	4.19811	5.56296	4.59368	5.45893	3.1362	5.29097	0.843446	-1.59496	6.63785	8.48471	-0.0948535	2.18055	2.62752	5.80452	15.9738	5.07911	5.23596	5.04887	4.96456	4.88282	5.03121	5.06195	5.14261	5.0917	5.04803	5.09537	5.05359	5.08234	5.01117	5.09217	4.95258	4.87086	5.12364	5.16806	4.90438	5.00397	5.00742	5.12713	5.40958
ADIPOR1	470.868	498.764	504.526	453.809	485.492	636.453	343.798	335.457	411.798	507.988	445.551	468.101	478.981	465.855	458.123	472.646	490.704	490.618	456.803	283.766	206.174	329.329	168.767	401.647	8.68817	8.77762	8.78992	8.7393	8.70508	8.73215	8.69147	8.89203	9.28507	8.8106	8.62885	8.74322	8.73399	8.7511	8.80175	8.80538	8.87453	8.90805	8.80331	8.55672	8.05096	8.42633	7.96611	8.65572
ADIPOR2	633.773	577.369	574.048	510.581	587.734	877.836	731.283	708.453	623.586	608.003	553.646	859.493	711.619	727.535	708.483	708.231	731.253	701.103	589.366	323.194	417.658	443.419	311.2	662.485	9.07959	8.96901	8.95145	8.89395	8.96972	9.19537	9.7087	9.85751	9.75677	9.05258	8.92145	9.62071	9.31965	9.3968	9.43946	9.4202	9.46302	9.42665	9.16121	8.75372	9.00926	8.82867	8.81868	9.31795
ADK	495.206	508.623	577.502	473.681	441.568	426.482	275.157	223.931	259.281	468.241	457.529	336.513	373.696	373.028	286.384	308.795	340.528	305.154	298.1	171.48	192.329	257.477	133.387	256.755	8.75465	8.80414	8.95776	8.80331	8.58563	8.22193	8.3858	8.3754	8.74073	8.7045	8.66488	8.27373	8.40271	8.44097	8.17092	8.2003	8.36005	8.26412	8.2003	7.88606	7.96417	8.0809	7.64463	8.06306
ADM	1604.8	1487.83	1785.39	1607.94	1922.8	3906.52	3458.49	5369.36	11428.3	1814.51	1697.96	2312.1	2514.28	2371.39	2225.8	2648.1	2080	1961.83	1844.36	1273.87	910.984	1244.29	812.526	1984.33	10.3709	10.2804	10.526	10.4901	10.6374	11.3595	11.8049	12.522	13.2449	10.5981	10.514	11.073	11.1475	11.1327	11.0965	11.3534	11.0554	10.9258	10.905	10.7438	10.0742	10.3564	10.1429	10.8753
ADM2	14.2056	15.1035	19.5969	21.2621	20.6631	125.353	165.005	103.24	59.6294	19.6543	20.2766	143.101	169.445	150.911	129.527	143.523	157.677	126.905	102.296	26.9511	33.394	13.1258	50.8155	15.9015	5.35181	5.37759	5.5227	5.57725	5.49866	6.63754	7.73144	7.3886	6.94447	5.47871	5.50208	7.11306	7.3291	7.208	7.09163	7.13019	7.31309	7.07855	6.78623	5.80356	5.96177	5.32877	6.43317	5.40598
ADNP	222.405	216.646	183.108	194.8	213.679	241.465	136.014	132.931	137.126	221.758	171.756	160.327	184.218	169.792	117.112	163.38	207.065	169.091	205.809	160.909	147.346	238.879	141.32	194.023	7.7366	7.71247	7.53168	7.65842	7.64217	7.47362	7.49075	7.71343	7.95804	7.73351	7.40069	7.26754	7.45577	7.35989	6.95669	7.30936	7.68378	7.45788	7.68719	7.80126	7.60659	7.97617	7.72099	7.69964
ADNP2	237.067	235.697	226.022	224.709	303.579	423.623	328.929	320.684	479.195	265.059	238.755	209.51	225.762	245.604	185.605	257.791	224.84	199.274	196.392	149.306	121.58	155.58	85.9368	178.377	7.81336	7.81422	7.78426	7.83462	8.10019	8.21219	8.62448	8.83901	9.45936	7.95341	7.83682	7.63637	7.72445	7.87553	7.56867	7.94664	7.78242	7.6655	7.62879	7.70106	7.34525	7.41901	7.04802	7.59627
ADO	210.929	192.651	207.453	228.348	167.848	235.058	76.9326	44.754	16.4784	203.681	201.589	167.992	197.593	246.09	161.952	184.238	219.197	178.418	200.947	117.47	95.3856	155.999	77.8136	146.436	7.67002	7.56445	7.68597	7.8541	7.34118	7.43521	6.76854	6.41507	5.74669	7.61375	7.60689	7.3328	7.5533	7.87694	7.38159	7.48189	7.75039	7.52418	7.65624	7.35114	7.02949	7.42382	6.9189	7.32507
ADORA1	3.65836	2.59123	5.78887	4.35985	5.86173	10.8765	5.25091	2.44437	1.91509	3.30801	7.3216	7.63046	6.86222	4.96507	4.59292	3.91092	2.88463	4.89649	3.00189	7.1778	9.4642	6.13002	11.5855	14.3471	5.03369	5.00397	5.11099	5.0742	5.10028	5.16638	5.11323	5.03211	5.00179	5.02183	5.15069	5.14132	5.11958	5.06422	5.07001	5.04214	5.00964	5.07045	5.01034	5.15223	5.25226	5.11809	5.34125	5.36259
ADORA2A	4.6953	6.34838	9.79486	2.10684	15.5309	8.80854	6.61425	15.3986	9.38257	15.5836	17.3905	24.9402	22.0617	20.7802	26.4607	33.3071	19.4872	16.7659	15.0867	27.0556	20.675	27.1809	26.0288	21.8725	5.07071	5.11969	5.23628	5.00093	5.37026	5.12442	5.16399	5.58017	5.38342	5.37696	5.42837	5.55579	5.49821	5.46812	5.64025	5.73068	5.45014	5.40062	5.3445	5.80534	5.61246	5.69279	5.83049	5.57168
ADORA2B	1413.07	1428.27	1430.31	1306.69	1239.94	961.758	430.114	198.368	154.057	1278.44	1423.69	1064.05	912.875	964.092	619.389	769.67	947.86	872.953	985.755	695.874	806.183	1084.06	664.665	1766.32	10.1695	10.2207	10.1916	10.1883	9.99218	9.30858	8.96972	8.21396	8.09958	10.082	10.2296	9.93272	9.67714	9.79898	9.23722	9.53333	9.87046	9.73321	9.93272	9.86065	9.93173	10.1314	9.87341	10.7107
ADORA3	-0.074822	0.288708	1.77859	3.15184	0.709993	0.705188	-0.664356	-2.17006	-1.80778	1.80177	-0.771164	0.863294	-0.539061	0.560841	-2.11853	4.80771	0.19619	4.20858	0.58056	1.50138	0.590935	3.15894	1.34628	1.61097	4.90898	4.9313	4.98416	5.03414	4.94786	4.93818	4.90954	4.85525	4.85521	4.97497	4.90511	4.94217	4.89963	4.93067	4.86618	5.06892	4.92483	5.04973	4.93455	4.95864	4.95264	5.02395	4.97319	4.9743
ADPGK	537.734	510.137	470.883	432.382	646.953	891.388	552.278	322.311	176.418	509.442	508.433	547.698	546.409	537.469	443.234	453.502	443.842	365.733	409.759	357.091	515.388	521.584	436.192	703.296	8.86429	8.80698	8.69745	8.67376	9.09097	9.21869	9.30124	8.8446	8.25891	8.81802	8.80538	8.96409	8.93831	8.95145	8.75948	8.74133	8.72926	8.5016	8.65514	8.88838	9.29815	9.06212	9.27634	9.40825
ADPRH	21.9781	22.3001	33.1636	14.0144	17.4778	51.7857	19.0885	16.6022	9.53389	19.3555	12.8983	24.4127	24.8301	30.3082	32.2495	27.9667	22.3218	23.3512	20.3741	19.3619	18.4078	13.5783	12.539	14.8638	5.54581	5.56245	5.839	5.38352	5.42023	5.87999	5.60683	5.62936	5.39173	5.46847	5.31159	5.54239	5.56049	5.66925	5.76452	5.61326	5.51418	5.5592	5.48323	5.57049	5.54367	5.34125	5.37124	5.37789
ADPRHL1	8.86266	3.13831	3.65275	5.81543	6.61374	9.28566	6.80862	19.4426	7.9326	10.3797	8.33264	7.93461	8.6279	9.25916	12.276	13.9976	8.94352	7.23297	12.0677	4.27349	7.30561	5.75732	4.39021	3.5815	5.19658	5.01951	5.04344	5.12129	5.12072	5.13441	5.17094	5.72385	5.30087	5.23449	5.17979	5.14965	5.16726	5.18396	5.28967	5.30151	5.18359	5.14125	5.26697	5.05293	5.17853	5.1051	5.07911	5.03389
ADPRHL2	566.797	537.104	601.373	482.414	562.476	713.847	377.048	298.297	186.3	480.177	518.677	519.605	543.712	537.361	575.013	515.218	537.625	450.99	492.454	266.828	330.886	406.464	244.642	385.537	8.9369	8.86727	9.00926	8.82156	8.90805	8.89634	8.81802	8.7589	8.32985	8.73524	8.82592	8.88525	8.93244	8.95103	9.13355	8.92279	9.01095	8.78676	8.89961	8.47164	8.6826	8.71237	8.47355	8.59801
ADRA1A	1.2682	-0.00512011	-0.260866	-1.37046	-0.732947	-0.867868	-2.12804	0.32802	-1.07621	-1.29805	-0.838186	-1.93355	-1.43586	1.38251	-1.83334	0.757896	-0.863542	-3.2065	0.932648	-0.616393	-1.22259	2.64445	-1.28188	0.203683	4.95613	4.92218	4.91754	4.89058	4.90218	4.89753	4.85772	4.95045	4.88451	4.88288	4.90276	4.85454	4.87027	4.95667	4.8741	4.94974	4.89251	4.81194	4.94573	4.88789	4.8938	5.00808	4.88748	4.93173
ADRA1B	140.397	138.856	142.588	129.192	173.704	258.821	123.552	59.3652	31.6735	183.269	198.04	100.361	80.052	87.9219	67.51	72.2618	129.299	153.087	148.613	123.481	151.685	155.574	124.39	283.535	7.13278	7.13336	7.21235	7.13019	7.37926	7.57002	7.36539	6.71528	6.28388	7.4719	7.58044	6.68551	6.44801	6.56046	6.36625	6.35001	7.03091	7.32436	7.25423	7.42537	7.64828	7.41861	7.558	8.19181
ADRA1D	-4.6449	3.79554	-1.14015	-0.486807	0.55404	6.29656	3.5678	-0.728036	-2.77709	0.642402	6.3455	-0.350798	-4.81215	-1.98931	1.38881	1.83775	-0.0289917	-0.805119	3.9952	3.76061	5.44341	2.11946	7.2958	-0.634323	4.75243	5.0402	4.88926	4.9176	4.94263	5.0687	5.05599	4.90879	4.8189	4.94138	5.12043	4.90474	4.76074	4.84586	4.97446	4.98296	4.91842	4.89003	5.04087	5.03612	5.11226	4.99119	5.18065	4.90587
ADRA2A	31.6076	32.1508	28.1054	25.7323	25.9367	44.4642	17.1466	19.7548	14.5917	36.8246	38.8739	20.8896	35.5886	35.1896	38.0143	27.535	31.483	23.0878	41.0049	30.8026	33.1675	54.2678	28.5147	37.83	5.76452	5.78244	5.73122	5.692	5.6139	5.77317	5.54167	5.73227	5.6545	5.85807	5.90699	5.46284	5.77593	5.77091	5.87823	5.60082	5.71987	5.55313	5.91993	5.90281	5.95562	6.22902	5.90506	5.92929
ADRA2B	21.2979	8.77016	17.1718	10.5689	15.4503	25.7577	8.93509	7.49385	-1.97444	9.42711	16.2072	6.98911	15.2328	9.263	14.9344	5.78692	15.8631	13.0345	8.34929	10.9794	12.3479	9.66248	6.48536	10.2116	5.52826	5.19639	5.44927	5.27085	5.36861	5.46211	5.24615	5.2355	4.84902	5.20629	5.39988	5.12339	5.34072	5.18421	5.35428	5.09531	5.36182	5.30502	5.16382	5.28215	5.34699	5.22391	5.15112	5.23316
ADRA2C	5.79499	0.458019	8.96195	1.7262	1.33864	-0.771535	5.25929	2.89996	0.308165	5.29607	2.84908	9.52597	2.93459	-3.63545	0.674866	3.03491	4.48487	6.05555	4.18791	0.54394	-6.19044	0.789085	4.47363	1.64142	5.1038	4.93732	5.21109	4.98837	4.96677	4.90008	5.11356	5.05018	4.94026	5.08309	5.01437	5.19133	5.00673	4.79349	4.95314	5.01791	5.05606	5.10739	5.04758	4.92611	4.73535	4.94851	5.08136	4.97534
ADRB1	-4.38507	-1.64106	11.3451	4.94865	11.9273	6.6596	3.3702	-1.40856	2.96456	-0.426041	3.60757	-0.620024	8.72542	-0.889751	4.42286	2.22276	6.56768	0.246861	5.99012	5.68552	5.62329	1.04673	5.23842	9.99614	4.76066	4.86949	5.2846	5.09412	5.27135	5.07659	5.04818	4.88333	5.04497	4.9097	5.0379	4.89662	5.17007	4.88268	5.06518	4.99388	5.11401	4.92414	5.10106	5.10033	5.11885	4.95533	5.10884	5.22576
ADRB2	1221.08	1193.88	1059.2	1007.61	1377.5	2200.09	1024.94	598.361	510.782	1255.92	1190.5	490.807	472.003	497.974	489.201	1141.28	674.451	767.935	885.246	712.113	480.843	632.686	400.344	1066.48	9.98295	9.95809	9.77391	9.81181	10.147	10.4866	10.147	9.65155	9.53859	10.054	9.99105	8.79964	8.71502	8.84045	8.89395	10.1507	9.34409	9.55246	9.75105	9.89404	9.20452	9.35998	9.17126	9.98547
ADRB3	-3.24695	4.57646	6.14385	-1.43941	-1.85592	-5.13545	3.10667	-2.6465	0.0591716	-5.01629	1.35233	-1.34157	-2.8188	1.54392	-1.65333	0.0209743	0.380753	3.49974	-2.15676	0.291667	-3.39669	0.331031	-1.76112	4.896	4.79964	5.06562	5.12292	4.88771	4.8667	4.78546	5.03896	4.83746	4.92978	4.76921	4.96852	4.8741	4.82627	4.96127	4.8799	4.92745	4.93091	5.02759	4.84677	4.91757	4.82322	4.93417	4.8723	5.0727
ADRBK1	559.387	580.559	570.738	600.019	639.261	694.466	394.142	269.737	289.467	576.237	611.906	615.595	591.602	596.887	615.623	605.527	571.121	542.719	657.412	484.058	506.832	603.09	465.028	584.227	8.91817	8.97516	8.94258	9.10893	9.07647	8.85993	8.86727	8.63392	8.87928	8.98045	9.06052	9.12845	9.04954	9.10105	9.2272	9.1647	9.09645	9.04738	9.3376	9.33368	9.27722	9.28507	9.3724	9.14673
ADRBK2	3.21583	5.03186	1.6504	1.88562	2.38007	1.19174	-2.90342	1.56412	0.159178	-0.732308	7.92403	3.84831	3.82061	13.7291	4.75764	1.90417	8.33538	-0.490269	-3.04389	-1.25596	4.28794	2.13164	3.12052	0.192306	5.01892	5.07976	4.98026	4.99355	4.99822	4.95007	4.83077	4.99873	4.93357	4.90008	5.16638	5.03207	5.03349	5.30121	5.07568	4.9851	5.16693	4.9007	4.81773	4.86593	5.07168	4.99177	5.03511	4.93141
ADRM1	1590.75	1489.55	1620.54	1486.63	1598.86	2012.28	1295.78	1319.15	1729.79	1537.54	1636.7	1462.32	1400.74	1398.29	1363.89	1335.91	1273.74	1240.29	1235.09	773.991	829.767	1310.02	694.466	1051.43	10.3545	10.2831	10.3636	10.3782	10.3759	10.3696	10.4447	10.635	10.8972	10.3305	10.4559	10.4047	10.3266	10.3853	10.3984	10.3952	10.3266	10.2657	10.297	10.0255	9.96302	10.4326	9.92377	9.96693
ADSL	1898.93	2395.54	2370.19	1952.56	2021.17	2093.99	887.98	512.366	312.721	1898.19	1991.72	1050.68	1125.67	1019.25	991.259	1021.17	1043.84	990.619	1130.22	899.243	929.056	1372.55	836.758	1477.61	10.6393	10.9914	10.939	10.7867	10.7128	10.4208	9.962	9.43946	8.97022	10.6877	10.7408	9.9178	9.98825	9.87609	9.94941	9.97157	10.0076	9.94235	10.1566	10.2406	10.1074	10.4975	10.181	10.4423
ADSS	474.94	430.443	441.683	406.558	376.386	505.527	232.768	132.473	83.3687	437.783	386.375	298.006	295.533	303.502	225.217	288.454	302.731	270.372	297.418	188.876	180.386	263.752	129.552	266.732	8.69968	8.58201	8.60961	8.60116	8.38078	8.43565	8.16172	7.70911	7.37397	8.62068	8.45429	8.10828	8.07949	8.17162	7.83631	8.10916	8.20604	8.1033	8.19797	8.0114	7.87847	8.11443	7.60689	8.11398
ADSSL1	15.5541	20.8016	23.8567	21.3839	23.8654	18.6581	9.60599	10.0227	14.7343	19.0943	15.3999	13.9485	14.2221	17.713	12.2886	14.7401	12.038	13.9253	18.0263	14.4166	9.24844	11.2911	8.71796	9.46256	5.38719	5.52802	5.63388	5.58112	5.56576	5.32504	5.27227	5.3425	5.66219	5.46256	5.37696	5.29713	5.31552	5.40114	5.29017	5.31946	5.26148	5.3286	5.42549	5.4028	5.24399	5.27536	5.2373	5.20868
AEBP1	-0.529156	1.89936	-1.48257	4.84593	7.29438	3.75434	1.91536	-1.41916	5.22008	-1.48427	8.21179	4.67071	6.64738	-4.51468	3.91287	-2.6093	2.60155	3.54956	1.16894	0.516352	11.6835	3.16361	0.805807	4.63014	4.89348	4.98233	4.87933	5.09001	5.13936	5.01285	4.99895	4.88292	5.1483	4.87724	5.1755	5.05632	5.11384	4.76657	5.05025	4.84421	5.0005	5.02907	4.95293	4.92541	5.32723	5.02415	4.95548	5.06413
AEBP2	93.0342	81.3569	101.471	96.7705	78.356	125.558	57.1164	32.3636	22.8909	84.2443	74.3238	66.5319	83.3101	49.4304	60.6968	84.7675	71.2544	62.3225	76.6227	56.8503	48.348	76.075	57.4039	73.0297	6.66243	6.55118	6.80331	6.78577	6.47353	6.63865	6.45447	6.1231	6.01389	6.56162	6.44522	6.27436	6.48629	6.02252	6.27025	6.5004	6.36722	6.29847	6.47246	6.47089	6.27066	6.55003	6.5484	6.5176
AEN	370.009	357.679	371.039	315.497	358.399	293.288	157.9	91.7732	53.0505	318.756	287.678	175.255	177.806	219.378	195.51	185.821	197.636	154.493	175.287	156.726	104.897	247.772	75.2266	176.035	8.37957	8.3473	8.40348	8.26658	8.3119	7.73576	7.6775	7.23012	6.80889	8.19434	8.06076	7.38398	7.4028	7.72555	7.6426	7.49809	7.61705	7.3372	7.48473	7.76422	7.15852	8.03493	6.8693	7.58044
AES	228.244	241.064	240.829	203.957	213.293	244.67	108.327	78.4084	65.7446	225.814	162.263	188.953	181.07	189.401	186.153	196.688	184.806	193.079	180.467	120.807	134.479	166.295	124.005	128.602	7.75886	7.84272	7.86289	7.71247	7.63826	7.49122	7.18755	7.02196	7.07166	7.75618	7.3228	7.49283	7.4329	7.52214	7.57127	7.57689	7.52275	7.62594	7.52691	7.39226	7.48533	7.51154	7.5533	7.16298
AFAP1	21.6165	20.6499	17.3834	19.2765	25.2663	20.1149	14.188	8.81879	4.77084	13.6293	17.8748	17.1803	19.0939	20.0383	18.6999	21.5073	18.8618	17.2316	15.1904	18.6794	14.1047	15.705	14.3233	19.5103	5.53589	5.52418	5.45691	5.52935	5.59842	5.35355	5.43664	5.29254	5.12665	5.32674	5.43961	5.37266	5.4293	5.45285	5.44887	5.4724	5.43664	5.41372	5.34616	5.55112	5.40576	5.40434	5.43333	5.50538
AFAP1L1	44.9595	43.4601	36.1566	33.2606	38.8334	38.5513	18.1721	15.4967	21.908	43.8465	37.0751	41.7834	32.9375	46.8487	30.2504	34.5784	28.4815	36.5386	35.2102	23.2645	11.0393	18.4976	15.244	24.3549	6.02114	6.01133	5.90506	5.85663	5.89657	5.6792	5.57445	5.58437	5.98126	5.99279	5.86777	5.87445	5.72422	5.98234	5.72711	5.75538	5.64945	5.84711	5.805	5.69167	5.30579	5.48274	5.47017	5.63363
AFAP1L2	591.425	609.174	545.469	469.406	512.56	794.349	419.535	241.339	143.067	682.497	707.486	544.568	570.093	567.809	555.083	609.575	675.385	668.626	641.896	600.467	385.286	560.763	377.608	525.366	8.98327	9.0467	8.89019	8.79275	8.77506	9.05515	8.94033	8.48398	8.01294	9.21004	9.25443	8.95374	9.00076	9.02925	9.08139	9.1737	9.3466	9.35998	9.29394	9.6417	8.89802	9.16858	9.08838	9.0142
AFAR3	0.699771	-0.622517	-1.58453	6.24539	10.7347	-0.502072	5.79916	-1.46544	2.49806	2.33173	1.13494	4.49468	5.97143	6.17727	3.58284	9.40983	9.07643	1.93881	1.30255	8.68549	9.84614	3.3529	5.86358	-0.297936	4.93561	4.90253	4.87644	5.13545	5.23976	4.90771	5.13255	4.88092	5.0264	4.99064	4.96221	5.05086	5.09776	5.10028	5.04113	5.1896	5.18727	4.9779	4.9571	5.20142	5.26463	5.03013	5.12982	4.91623
AFARP1	-0.675992	-1.35383	-2.40155	2.86281	0.602723	-0.673035	0.0637399	2.27406	-1.8137	1.95437	-1.43394	-1.2587	3.82363	3.68832	2.46592	5.68314	0.39333	4.11606	2.76494	5.57092	1.95673	-2.50582	6.67946	5.48742	4.88864	4.87894	4.84976	5.02508	4.94396	4.903	4.93549	5.0257	4.85482	4.97934	4.88509	4.87625	5.0336	5.02656	5.00644	5.09317	4.93118	5.0469	5.00369	5.0968	4.99731	4.84731	5.15796	5.09265
AFF1	14.2864	11.5618	4.16314	8.54343	12.7577	31.6452	33.9915	30.5888	16.4661	9.73315	9.47568	18.367	11.9105	15.0801	12.3815	11.9038	10.2434	9.1608	11.0593	8.83422	10.4745	15.0866	4.6316	5.94085	5.35391	5.27825	5.05984	5.20997	5.29435	5.56552	6.00839	6.06372	5.74528	5.21614	5.21359	5.39988	5.2558	5.33515	5.29198	5.25149	5.2157	5.19467	5.241	5.20525	5.28519	5.38566	5.08747	5.10496
AFF2	3.33126	-0.327007	-0.358673	-6.23008	4.76099	-2.46261	1.76321	-0.572023	-2.85696	-2.21172	-1.09518	-1.16582	2.85261	0.126728	-0.970581	-0.382995	-4.90129	1.74551	-4.01107	-3.83044	-2.07908	-6.38053	-5.12447	0.219994	5.02278	4.91197	4.91411	4.73435	5.06793	4.85743	4.99372	4.91478	4.8157	4.85497	4.89579	4.87942	5.00419	4.91557	4.90202	4.91491	4.76001	4.9721	4.78824	4.77649	4.86636	4.72637	4.75817	4.93253
AFF3	-3.55731	-7.59543	-3.77287	-5.69392	-3.14355	-6.49892	-2.94697	-2.30436	-2.15614	-3.72568	-3.77771	-6.74317	-0.444117	-3.36752	-4.12227	-0.591716	-3.98996	-4.05724	-4.66096	-4.96668	-3.28102	-1.00547	-2.61789	-5.81561	4.78866	4.68017	4.80389	4.75008	4.82633	4.74737	4.82944	4.84989	4.84242	4.80781	4.81082	4.697	4.90273	4.80087	4.80372	4.90861	4.78741	4.78405	4.76776	4.73668	4.82722	4.89387	4.84504	4.74514
AFF4	190.066	165.043	161.734	145.86	189.211	253.972	216.996	327.577	277.186	207.485	172.79	158.964	134.208	150.035	136.221	191.366	221.409	167.744	215.147	106.922	107.683	134.176	90.3143	129.593	7.51879	7.37246	7.37505	7.283	7.48473	7.54408	8.08321	8.86275	8.82034	7.64217	7.40702	7.25423	7.02474	7.19613	7.16468	7.53718	7.76463	7.44655	7.74395	7.2241	7.19613	7.20608	7.11787	7.17246
AFG3L1	54.8991	56.9577	49.1736	52.7584	71.5554	104.142	57.7007	33.4405	20.2023	64.3736	54.9015	62.2672	64.188	69.2255	75.8717	84.9935	62.078	63.3799	65.0371	71.8029	70.7254	104.007	72.0045	62.741	6.18657	6.22945	6.15174	6.232	6.3842	6.45263	6.46347	6.15509	5.91382	6.31	6.1696	6.21633	6.24047	6.32697	6.47565	6.50263	6.23654	6.31668	6.31044	6.72794	6.65436	6.88636	6.81439	6.36593
AFG3L2	1185.66	1169.16	1291.99	1121.95	1195.51	1359.73	737.813	544.385	363.137	1170.85	1183.74	796.831	721.583	777.194	920.608	811.998	761.048	746.696	841.143	640.031	771.594	922.415	586.931	1020.97	9.94684	9.92255	10.0566	9.96302	9.93729	9.82204	9.72311	9.52657	9.14911	9.97157	9.98175	9.52657	9.34133	9.49155	9.82388	9.62453	9.51827	9.51087	9.68461	9.73321	9.87046	9.87471	9.69999	9.92142
AFM	-4.52437	-3.41681	-1.77072	-4.29282	-1.05942	-4.19085	-5.79179	-6.33453	-3.30651	-4.35008	-0.491707	-1.68518	-0.239382	0.488491	-0.979995	-7.16809	-4.43139	-1.27555	-2.51651	3.38285	-6.52685	-7.57887	-4.53139	-6.43267	4.75669	4.81141	4.87011	4.79392	4.89183	4.81238	4.73013	4.70037	4.79918	4.7906	4.91311	4.86227	4.90875	4.9281	4.90181	4.69846	4.77379	4.87582	4.83477	5.02242	4.72525	4.6892	4.77899	4.72744
AFMID	32.2597	39.427	47.0221	34.822	34.3298	28.2699	22.1476	27.8172	71.5466	40.8171	40.4703	41.3993	34.3967	26.5556	37.9004	33.7115	37.0382	36.6288	28.5552	26.2522	24.9652	19.1801	21.2079	26.3399	5.78035	5.92929	6.11619	5.88949	5.80209	5.50261	5.70113	5.98998	7.18156	5.94025	5.93991	5.86724	5.75113	5.59356	5.87688	5.73896	5.82908	5.85094	5.67057	5.78497	5.73834	5.50134	5.68537	5.68511
AFP	-3.74112	-0.0166817	0.580414	-2.37311	0.88215	-1.68846	3.9528	-0.0586181	3.82841	-0.238693	-3.67436	-1.14569	-2.19325	2.1661	-0.436271	-0.590583	4.43874	3.61506	7.56555	4.88119	-5.63288	-3.95316	0.601294	-0.435005	4.78299	4.92173	4.94367	4.85833	4.95282	4.87783	5.06909	4.93532	5.0842	4.91463	4.81531	4.87997	4.8468	4.97984	4.91888	4.90865	5.0551	5.03092	5.14293	5.07317	4.75425	4.80357	4.94881	4.91172
AFTPH	167.343	148.875	134.741	145.087	147.906	253.961	143.529	157.949	132.417	138.772	140.772	170.516	164.296	178.075	162.379	185.561	166.539	147.31	157.136	86.9496	86.95	144.829	64.4057	114.255	7.35436	7.23214	7.14223	7.2782	7.17202	7.54353	7.55945	7.93369	7.91901	7.12332	7.14301	7.35341	7.28433	7.43577	7.38583	7.49637	7.38398	7.27227	7.33792	6.96221	6.89659	7.31622	6.6766	7.01217
AGA	101.705	86.3424	97.2086	89.6971	93.5981	160.605	75.8386	40.9168	15.7924	95.119	114.514	106.551	115.237	92.1254	64.789	78.8673	88.5941	107.811	97.0606	94.3414	91.4203	56.1852	76.7762	145.765	6.74714	6.60422	6.75918	6.70498	6.64972	6.92262	6.74652	6.3262	5.71051	6.67747	6.89042	6.75432	6.83247	6.60925	6.33041	6.43903	6.59292	6.86384	6.72128	7.06122	6.96659	6.26054	6.8977	7.31746
AGAP1	4.24386	2.4874	4.90726	1.89271	3.07642	2.80646	-0.996494	6.6375	0.863325	-1.30434	7.78689	1.44277	0.326532	2.38514	0.726967	3.64317	1.30506	0.585358	-0.123812	0.574839	-1.82777	-0.849751	1.83692	-1.93328	5.05468	5.0008	5.0838	4.99382	5.01972	4.99025	4.8974	5.1963	4.96069	4.88266	5.16282	4.96077	4.92463	4.98646	4.95464	5.03551	4.96053	4.93587	4.91188	4.92696	4.87389	4.89841	4.98905	4.86386
AGAP11	-4.48191	-0.612453	3.14023	-0.373877	1.69268	-4.18298	-5.68249	1.93337	0.694082	-2.75988	-7.13993	-4.59681	-0.446795	2.9234	-2.6638	-3.00661	-3.89552	0.989162	6.14763	0.412944	-1.64068	-0.961258	-1.12502	-2.09644	4.75748	4.90285	5.02684	4.92169	4.97725	4.81264	4.73378	5.01342	4.95447	4.83738	4.70552	4.76738	4.90255	5.00486	4.84896	4.83111	4.79047	4.94904	5.10554	4.92129	4.87993	4.89505	4.89246	4.85944
AGAP2	1.60344	3.59652	6.95309	-0.539519	8.05641	7.58556	2.06026	-0.952806	17.8357	0.152038	-1.16351	2.46057	1.39412	0.724026	3.4492	0.130746	2.98168	7.75987	1.73429	2.96859	1.74901	3.3205	4.91984	3.57613	4.96631	5.03349	5.14742	4.91584	5.16477	5.0975	5.00356	4.89996	5.81071	4.92584	4.89337	4.99116	4.95882	4.93579	5.03729	4.93033	5.01216	5.15391	4.97107	5.00866	4.99077	5.02899	5.0973	5.03369
AGAP3	48.3583	55.1302	52.9781	47.0739	49.6564	56.9216	37.0542	23.2115	22.6078	59.3926	48.6933	41.267	40.787	51.2709	41.0485	44.3761	41.4034	33.0195	43.877	22.9499	21.4576	31.931	19.9438	27.2495	6.08665	6.20143	6.21717	6.1324	6.0737	5.95041	6.0737	5.84711	6.00524	6.24194	6.07802	5.86524	5.87823	6.04841	5.93555	5.93345	5.9099	5.77698	5.97303	5.68095	5.63588	5.80021	5.64442	5.70461
AGAP6	119.366	138.247	86.6031	99.5735	137.665	258.358	164.936	165.641	82.7963	190.536	128.329	183.394	167.165	171.427	229.427	161.752	154.525	129.727	160.29	167.321	175.309	233.234	202.584	127.508	6.9319	7.12716	6.64196	6.82062	7.07477	7.56765	7.7296	7.98331	7.36255	7.51556	7.01508	7.44655	7.3137	7.37565	7.85922	7.2983	7.283	7.10753	7.36651	7.85353	7.83932	7.94024	8.21746	7.15068
AGAP7	-0.466954	3.38152	5.30888	6.24365	2.64137	-0.101285	1.40976	0.482283	8.94879	2.44584	-3.56882	5.92923	4.07265	-1.51324	9.54602	0.897119	9.05579	-0.537304	15.8655	5.19728	5.07212	2.45949	2.02189	4.13996	4.89566	5.02714	5.09629	5.13528	5.00616	4.91872	4.98106	4.95713	5.35795	4.99395	4.81839	5.09131	5.04127	4.86157	5.213	4.9544	5.18651	4.89903	5.3654	5.08409	5.09828	5.00251	4.99494	5.05069
AGAP8	359.004	344.994	249.982	341.745	453.235	907.519	591.278	538.368	241.935	435.598	436.926	529.36	551.432	612.293	770.702	714.314	487.762	530.235	598.632	613.216	633.569	811.222	683.292	478.229	8.3375	8.29678	7.91221	8.37317	8.61773	9.23909	9.38588	9.51087	8.65692	8.61017	8.60116	8.9165	8.95145	9.13965	9.56148	9.43661	8.86496	9.00822	9.18691	9.6712	9.58661	9.69707	9.9088	8.89395
AGBL1	-3.95545	-1.81075	-1.96659	-8.63974	-2.95301	-3.92637	-4.77251	-2.77129	-1.70651	-1.49387	-2.30898	-1.20871	-7.63104	-2.88237	-2.11922	-5.40591	-1.71032	2.42312	-1.95577	3.34649	2.79688	-4.06649	-4.88127	-3.36816	4.77459	4.8637	4.86402	4.65535	4.83261	4.81909	4.76449	4.83255	4.85859	4.87672	4.85805	4.87798	4.66544	4.81542	4.86614	4.75591	4.86618	4.99296	4.85333	5.02127	5.02308	4.80059	4.76712	4.82167
AGBL2	-2.9843	3.82493	-7.63206	-2.91277	2.97634	0.00318464	4.35241	-4.02561	3.98878	0.622719	-1.54262	3.17572	4.47306	1.91615	-1.27143	1.81406	1.11746	2.85251	3.05817	-1.34602	1.59502	0.423553	-0.343942	3.333	4.81024	5.04176	4.67417	4.83937	5.01701	4.92084	5.0832	4.78731	5.0918	4.94092	4.88182	5.01195	5.05311	4.97241	4.89264	4.98225	4.95399	5.00611	5.01233	4.86303	4.98518	4.93702	4.91726	5.02656
AGBL4	3.24547	-0.736332	5.16472	-0.939902	-1.75776	4.45383	-0.711288	-1.86382	-2.89331	-3.34887	-3.65535	-1.11141	-2.24408	-3.90818	-2.04217	-4.72175	3.32608	-3.04682	-0.104502	-6.54474	0.818325	-4.3857	-0.722849	-0.812973	5.02008	4.89875	5.0917	4.90329	4.8702	5.02864	4.9075	4.86686	4.8139	4.81915	4.81591	4.88099	4.84521	4.78581	4.86847	4.77715	5.02156	4.81779	4.91272	4.683	4.96031	4.79108	4.90587	4.9007
AGBL5	57.3983	68.2511	59.2184	52.6975	56.5305	97.1094	37.9654	24.4966	21.9001	61.9224	61.2069	120.864	96.6197	102.138	107.007	99.0435	106.179	102.713	109.872	71.5033	84.972	106.391	75.5264	69.5571	6.22214	6.39341	6.31106	6.23007	6.18275	6.3987	6.09481	5.88734	5.98095	6.27332	6.26929	6.89538	6.6407	6.72128	6.85042	6.67024	6.79511	6.80331	6.87132	6.72249	6.8693	6.90908	6.87788	6.47089
AGC1	0.214366	-5.44304	-0.761536	-5.54137	-3.54063	0.0466951	-4.68821	1.16276	-0.643831	22.3655	-5.90034	-1.62945	-7.77162	-2.08517	4.57057	-5.04214	-1.6465	-2.68995	-1.64815	0.514849	-3.3533	-3.11816	-1.52428	-1.43978	4.91828	4.74726	4.90091	4.75479	4.81376	4.9221	4.76806	4.98369	4.90253	5.54581	4.74514	4.86438	4.65995	4.84304	5.06917	4.76597	4.86895	4.82944	4.86394	4.92532	4.82454	4.82886	4.88021	4.88051
AGER	3.77348	1.89175	3.84849	-0.941224	7.17318	2.06315	3.0678	7.57393	2.27765	-0.304293	3.95092	4.24873	5.58863	8.24364	1.36496	1.35586	5.81845	3.54059	2.78763	1.48232	7.62903	4.26235	6.66365	7.32102	5.03724	4.98204	5.04942	4.90317	5.13578	4.97215	5.03808	5.23791	5.01706	4.91263	5.0483	5.04367	5.08635	5.15819	4.97371	4.96902	5.0946	5.02874	5.0043	4.95787	5.19019	5.05849	5.15714	5.14626
AGFG1	23.5253	23.7295	17.4436	23.0361	20.9008	21.184	13.0375	17.1714	15.7379	22.05	21.0233	14.1175	13.5178	20.0021	17.7535	20.1928	16.2152	15.0989	17.2641	13.6288	9.51125	19.4569	10.3042	14.2699	5.57947	5.59584	5.45919	5.6185	5.504	5.37316	5.39599	5.64859	5.7082	5.5373	5.52361	5.30294	5.29858	5.45224	5.42457	5.44088	5.36838	5.35914	5.40464	5.37844	5.25364	5.50714	5.29409	5.35869
AGFG2	22.0504	33.1645	37.3617	34.2856	32.361	35.8494	17.0079	15.0239	18.3168	34.8057	28.5636	32.7483	30.7377	31.2485	33.6219	33.4826	25.2101	25.7261	24.3702	26.791	32.4148	36.0942	22.6489	38.8102	5.54778	5.80135	5.92929	5.8785	5.76016	5.64104	5.53617	5.56613	5.83319	5.81666	5.69326	5.71484	5.67868	5.69	5.79744	5.73481	5.58134	5.61277	5.57753	5.79767	5.93918	5.89009	5.73456	5.94978
AGGF1	135.885	126.515	122.61	127.484	122.243	140.059	73.2606	57.4961	18.5587	118.23	106.509	137.619	147.48	129.997	106.98	130.865	155.952	115.806	144.899	72.3375	82.388	125.339	76.719	94.0469	7.08535	7.01103	7.03197	7.11742	6.9263	6.7654	6.71017	6.67462	5.84431	6.91838	6.80947	7.06008	7.14076	7.00142	6.85001	7.01343	7.29554	6.95325	7.21802	6.73618	6.82565	7.12285	6.89659	6.77612
AGK	226.548	222.508	247.853	258.629	234.548	291.983	144.66	96.4696	49.7978	214.701	247.715	236.809	232.697	217.441	195.568	200.927	165.858	168.603	195.24	136.39	134.396	175.64	127.996	199.367	7.75133	7.74594	7.90212	8.0066	7.76812	7.72874	7.56904	7.29424	6.72998	7.68808	7.88004	7.80884	7.76713	7.71008	7.64315	7.60579	7.37976	7.45342	7.62115	7.56021	7.48473	7.58242	7.5967	7.73815
AGL	31.4145	29.9238	25.9525	30.8459	28.1409	29.235	13.8854	7.8426	5.65162	34.2116	30.9944	32.1264	35.1994	31.2693	22.9832	35.7571	37.0916	31.9744	42.8159	35.4008	32.0312	32.0451	27.4914	35.7043	5.76016	5.73122	5.67952	5.80534	5.66299	5.52137	5.42525	5.24999	5.1712	5.80619	5.74881	5.70422	5.7697	5.69087	5.55313	5.78035	5.82967	5.75509	5.95381	6.02009	5.93141	5.80331	5.87634	5.89009
AGMAT	41.416	31.6658	52.3706	38.6781	39.894	19.7415	10.2535	3.27781	6.31389	34.7027	44.889	23.8959	15.8041	17.0183	13.0769	20.7393	27.5606	10.0911	28.0896	29.9233	21.151	14.0144	13.9895	27.6334	5.95313	5.76924	6.20682	5.97447	5.91472	5.34616	5.29198	5.06403	5.2093	5.81421	6.0159	5.52909	5.35277	5.38352	5.30856	5.45483	5.63184	5.22239	5.65983	5.88074	5.62716	5.35505	5.41898	5.71532
AGPAT1	24.1171	21.8578	27.908	27.1259	21.6301	25.1853	11.8872	7.6549	5.44871	22.7891	23.5502	40.2984	37.8563	39.5534	39.9862	41.7242	40.7093	37.2079	37.3458	23.5517	22.7605	29.6412	19.2709	30.5618	5.59478	5.55364	5.72562	5.71862	5.52186	5.45129	5.35239	5.24113	5.16061	5.55764	5.58816	5.84897	5.81666	5.85699	5.91382	5.88594	5.89687	5.85973	5.84921	5.7019	5.6742	5.74669	5.61999	5.77789
AGPAT2	266.285	274.351	282.662	229.406	287.214	342.526	202.301	165.483	131.156	219.127	197.165	313.102	266.419	264.755	268.454	288.853	251.117	234.03	237.856	133.293	149.691	188.826	130.581	207.324	7.95747	8.00177	8.06414	7.85879	8.02623	7.92897	7.98633	7.98181	7.9116	7.72042	7.57501	8.17239	7.94354	7.97617	8.08435	8.11123	7.94471	7.90086	7.8965	7.5298	7.63093	7.67361	7.6175	7.79293
AGPAT3	6.25859	2.42609	5.70843	5.24097	5.05513	4.17821	3.89859	2.54547	-0.805984	7.94536	4.67413	3.35269	3.41089	4.43496	5.08878	0.292062	3.21453	2.6469	3.66213	-0.0570651	3.95384	4.86311	3.09126	5.04453	5.11703	4.9987	5.10823	5.1028	5.07591	5.02208	5.06714	5.03625	4.89538	5.16222	5.07011	5.01706	5.02088	5.04927	5.0863	4.93539	5.0184	4.99912	5.03065	4.90581	5.06099	5.078	5.03414	5.07764
AGPAT4	21.2488	18.6475	19.0396	18.4869	20.3394	48.4835	24.5947	8.20031	5.7388	26.687	35.1219	46.8224	44.6618	46.2944	49.758	50.6531	46.9625	38.7645	41.8152	40.1286	55.2278	35.7054	60.3314	42.1786	5.52723	5.46893	5.50538	5.50823	5.49202	5.83567	5.77263	5.26463	5.17649	5.64302	5.83398	5.96722	5.94207	5.97155	6.09715	6.02504	6.00618	5.88864	5.93504	6.13625	6.40072	5.88145	6.6073	6.01976
AGPAT5	164.823	181.533	161.469	139.544	136.633	76.1263	42.8623	18.6634	6.13791	147.63	170.234	98.3113	71.7815	58.7091	42.4814	57.4327	64.0647	68.6732	72.0412	56.5832	68.2512	93.2019	55.4439	184.586	7.33792	7.48628	7.37246	7.22635	7.06573	6.16841	6.18559	5.69586	5.19796	7.1973	7.38583	6.65969	6.3384	6.17745	5.96648	6.13287	6.26591	6.38358	6.40731	6.46641	6.61613	6.7674	6.51385	7.64217
AGPAT6	35.2878	37.4309	27.2081	36.3321	28.3514	44.6161	36.0669	27.3025	14.6274	43.7043	33.7538	25.2176	32.8211	27.9657	25.5089	28.4523	25.4526	31.5256	30.2097	26.6556	27.8351	38.3035	27.6258	41.9056	5.84027	5.88631	5.71005	5.92294	5.66746	5.77746	6.05129	5.97385	5.65819	5.98971	5.80688	5.56169	5.72104	5.6245	5.61558	5.62474	5.58602	5.74528	5.70706	5.79467	5.81852	5.92879	5.88145	6.01452
AGPAT9	389.658	427.277	387.093	403.731	424.249	1021.6	871.36	573.383	302.479	457.492	471.772	414.305	534.19	495.012	380.242	400.63	579.755	517.816	376.098	211.268	206.806	267.735	217.061	367.477	8.45429	8.57124	8.45108	8.58964	8.53724	9.38418	9.93873	9.60197	8.92945	8.67279	8.71546	8.57124	8.90517	8.83274	8.5329	8.55976	9.12167	8.97766	8.53724	8.15298	8.05821	8.13223	8.30578	8.53436
AGPS	301.467	267.539	341.384	263.272	293.385	296.61	151.836	139.158	177.943	318.692	331.681	199.535	218.417	200.698	165.648	194.121	182.555	157.998	178.683	146.482	215.851	276.065	153.002	312.867	8.11569	7.96962	8.29923	8.03056	8.05313	7.74994	7.63292	7.77196	8.26996	8.19294	8.25168	7.57057	7.67894	7.5972	7.40927	7.55945	7.51154	7.35944	7.51421	7.67215	8.11191	8.17461	7.83065	8.32768
AGR2	104.774	96.5413	120.598	102.801	117.145	210.972	97.2358	180.01	280.832	114.298	87.789	141.527	125.353	135.547	84.8482	96.732	142.326	189.01	194.306	156.815	126.937	29.7835	83.105	109.141	6.78577	6.71411	7.00892	6.85374	6.88196	7.28047	7.05141	8.08224	8.83685	6.8766	6.60925	7.094	6.93983	7.05003	6.58664	6.64196	7.17113	7.60333	7.61278	7.76543	7.40482	5.74991	7.003	6.95492
AGR3	7.5713	7.12305	5.36634	3.74896	6.18488	15.0261	7.21454	7.354	8.60459	8.05263	3.74842	7.89264	0.240503	4.02792	3.70437	2.48975	4.07689	6.7854	7.85489	9.91097	5.57543	4.9545	0.770445	8.63691	5.15963	5.14485	5.09841	5.05394	5.10884	5.25065	5.18676	5.22956	5.34053	5.16574	5.04261	5.14796	4.92247	5.03713	5.04422	5.00204	5.04412	5.12758	5.1512	5.24447	5.11697	5.08126	4.95421	5.18506
AGRN	348.542	318.652	233.218	250.893	426.69	498.643	278.548	123.693	94.8564	332.017	381.882	279.124	343.992	326.574	411.782	350.36	307.979	332.577	368.336	578.802	724.771	791.121	775.03	496.387	8.29678	8.19181	7.82387	7.97057	8.54826	8.41655	8.40271	7.61963	7.53137	8.23952	8.43643	8.02969	8.29167	8.26606	8.64514	8.36927	8.23186	8.36927	8.49944	9.58863	9.78188	9.66113	10.0756	8.93968
AGRP	1.55342	-4.27413	-1.62233	-3.44215	-4.26321	-6.12048	-0.257709	-1.45636	5.16349	-1.42939	-0.922645	2.13859	2.49396	1.21135	2.60406	-1.51709	-1.57147	2.02755	-0.32215	1.15932	-1.22463	-0.810509	-3.02714	-1.04614	4.96481	4.78357	4.87498	4.82276	4.7906	4.75808	4.92395	4.88129	5.14538	4.87866	4.90063	4.98167	4.99266	4.95128	5.0109	4.87899	4.87182	4.9808	4.90568	4.94576	4.8937	4.89966	4.83237	4.89251
AGT	-4.78354	-2.96936	-3.01552	-2.69853	-0.479148	0.375797	-2.84397	-3.85375	-3.04015	-8.87276	0.99952	0.129267	-1.92256	-2.37388	-0.202941	2.65663	-0.337639	3.60154	1.20297	0.173388	1.18904	1.29301	0.770369	2.55232	4.74812	4.82605	4.82932	4.84613	4.91116	4.93041	4.83302	4.79318	4.80827	4.64411	4.9578	4.91921	4.85525	4.83447	4.92636	5.00659	4.90843	5.03053	4.95403	4.9133	4.9729	4.96353	4.95419	5.00228
AGTPBP1	47.8826	53.8399	43.4477	53.013	50.5258	72.6199	44.9853	48.5512	40.1282	49.6596	40.377	58.5134	57.5291	67.2229	49.0873	82.7923	63.4343	57.5587	53.2217	44.8389	25.8861	55.5908	26.4081	40.3906	6.07779	6.17926	6.0504	6.23604	6.09035	6.12937	6.23422	6.50485	6.51976	6.08755	5.93747	6.15811	6.14209	6.30175	6.08615	6.4819	6.25663	6.22023	6.12673	6.22971	5.76263	6.25059	5.84189	5.98667
AGTR1	2.79399	-0.324337	0.704918	2.01043	1.55104	0.0018495	1.49641	1.49689	-1.32097	2.92098	4.3693	2.46107	6.36672	2.56695	6.04139	5.14933	-2.31612	8.15604	1.89435	5.33128	6.13727	2.45991	6.2017	0.135147	5.005	4.91202	4.94782	4.99745	4.97298	4.92077	4.98389	4.99591	4.87486	5.01006	5.06099	4.99119	5.10784	4.99197	5.11491	5.07736	4.84558	5.16425	4.97608	5.0891	5.13621	5.00254	5.14082	4.9302
AGTR2	3.24214	-0.81802	0.149406	2.39054	7.47645	7.53201	9.21519	4.15883	-2.60222	1.67137	10.5676	-2.4436	3.52901	1.59833	-1.00019	3.7217	-1.36842	7.13978	2.05959	7.52894	-0.4277	8.47355	7.46979	8.98983	5.01991	4.89561	4.93147	5.01028	5.14579	5.09636	5.25611	5.09717	4.82565	4.97144	5.24339	4.83863	5.02415	4.96315	4.90095	5.03751	4.8781	5.13852	4.9822	5.16358	4.91999	5.18947	5.18676	5.19499
AGTRAP	91.0947	82.2374	105.035	58.59	80.5747	139.043	105.514	102.578	89.0056	78.1677	74.4804	192.681	174.979	169.503	152.344	135.683	177.867	145.379	148.764	67.6851	60.7606	61.2763	40.8603	99.8655	6.63955	6.56009	6.83982	6.32387	6.49807	6.75692	7.14223	7.37859	7.45229	6.48947	6.44597	7.52275	7.37357	7.35802	7.29741	7.06072	7.48584	7.25641	7.25676	6.65969	6.49331	6.33583	6.2175	6.84792
AGXT	3.69633	3.67226	-0.132301	-0.215857	2.10022	13.005	4.94432	6.77472	-0.35718	3.56692	4.19113	0.146623	7.1396	-0.532856	-1.17455	1.46867	-5.62299	-2.44679	-3.37783	9.47401	-3.51246	2.11965	-1.88786	-0.151222	5.03475	5.03561	4.9225	4.92718	4.99011	5.21022	5.10335	5.20302	4.91304	5.02983	5.05521	4.91961	5.12721	4.89505	4.89531	4.97227	4.73758	4.83832	4.8082	5.22822	4.81945	4.99123	4.86772	4.92091
AGXT2	-1.14549	1.07853	-8.09835	-4.70399	-4.06783	-4.87223	-0.669609	-5.14916	-2.6853	0.0349043	-3.12055	-6.15297	-1.47835	-3.57913	-1.51132	-3.9276	-1.98842	1.91114	-0.204127	-2.48674	-5.33892	-3.38932	-0.315225	-6.30884	4.87113	4.95729	4.66497	4.78111	4.79675	4.7928	4.90921	4.74514	4.82264	4.9224	4.83286	4.71797	4.86899	4.79436	4.88488	4.80136	4.85716	4.97717	4.90933	4.82384	4.76363	4.8205	4.91824	4.73083
AGXT2L1	-0.514294	-2.44089	-1.35298	1.38513	-3.31567	1.39475	-2.73504	-2.19475	0.716665	-4.97786	-3.36256	-1.09831	-6.94599	-2.04452	-3.07877	-2.8411	-2.52814	-2.45715	-3.78443	2.40957	-5.33818	-0.531323	-1.07	-0.582272	4.89396	4.84335	4.88288	4.97786	4.81993	4.95551	4.83705	4.8542	4.95538	4.77044	4.82506	4.88147	4.69259	4.84437	4.83556	4.83682	4.83838	4.8377	4.7959	4.98964	4.76378	4.90869	4.89417	4.90716
AGXT2L2	28.4639	36.0264	31.3264	27.9535	28.3824	58.2106	35.8352	19.2527	9.98866	21.3097	26.1162	55.0168	55.6536	57.6252	57.9132	51.4016	53.8567	50.6464	43.2128	39.5292	51.1663	33.1874	53.9144	31.8475	5.69766	5.85462	5.79635	5.73726	5.66897	5.9701	6.04528	5.71862	5.41997	5.52031	5.64271	6.10187	6.11144	6.16125	6.22902	6.03509	6.12042	6.10789	5.96307	6.12082	6.31904	5.83181	6.48884	5.80843
AHCTF1	290.551	258.144	222.921	265.208	296.8	380.072	302.426	186.21	134.604	276.795	276.344	230.458	247.86	253.41	229.272	314.68	252.388	226.213	286.271	218.105	159.738	297.14	164.729	242.6	8.0636	7.92553	7.76935	8.03985	8.0653	8.06201	8.50717	8.13406	7.94024	7.9961	8.00394	7.76886	7.84927	7.92179	7.8577	8.22126	7.95133	7.84463	8.15343	8.19914	7.72392	8.27959	7.93211	7.99372
AHCY	3221.1	3297.06	3435.91	2981.53	3002.09	3292.15	1635.66	1362.49	1574.87	3130.73	3073.34	2389.29	2435.78	2342.81	2234.01	2045.92	2191.74	2002.05	1933	1593.46	1977.47	2555.09	1562.37	2736.77	11.3801	11.4586	11.4619	11.4383	11.3331	11.0509	10.7459	10.6948	10.8031	11.448	11.4278	11.1408	11.1062	11.1062	11.0995	11.0115	11.1233	10.9707	10.9807	11.0597	11.1869	11.4303	11.0827	11.3888
AHCYL1	1622.35	1642.94	1478.9	1276.7	1619.65	2927.93	1625.93	1513.66	1084.65	1589.33	1517.15	1692.96	1715.07	1829.44	1829.12	1725.74	1683.45	1638.55	1462.44	1230.15	1420.47	1580.62	1167.25	1624.23	10.3888	10.4136	10.2321	10.1566	10.3905	10.8669	10.7408	10.8294	10.3613	10.3838	10.3324	10.635	10.6328	10.748	10.82	10.7321	10.7169	10.6603	10.5327	10.7009	10.7208	10.7151	10.6517	10.5897
AHCYL2	38.6428	31.8529	35.5944	26.4682	21.4594	34.2512	24.3961	25.88	4.91987	25.1443	24.3358	37.5158	28.48	35.5557	24.1249	35.7299	29.0114	28.6806	28.1022	15.4023	15.8119	30.5169	20.529	13.4724	5.90151	5.77296	5.89426	5.70461	5.51767	5.61122	5.76535	5.92555	5.13244	5.61579	5.60481	5.80356	5.63214	5.78053	5.58217	5.77975	5.66271	5.68743	5.6609	5.43638	5.46349	5.77028	5.66164	5.33549
AHDC1	13.1737	19.576	8.00805	11.6308	19.1859	21.5215	11.9729	11.8922	17.6703	14.7158	20.2907	29.1318	17.3978	20.4893	22.4868	32.6733	14.2665	26.8129	24.2002	21.4252	31.9491	24.2147	27.1336	23.6593	5.32269	5.49301	5.1779	5.30776	5.4602	5.38107	5.35702	5.42047	5.80161	5.35575	5.50244	5.63999	5.39173	5.46184	5.54045	5.71798	5.32154	5.64203	5.57355	5.63771	5.92847	5.61902	5.86827	5.61483
AHI1	10.5642	4.41594	1.30853	3.98254	16.9727	25.4473	26.7936	18.4477	0.958418	7.91555	15.8792	30.479	30.9083	39.1622	39.9561	48.1837	25.2872	17.9232	11.8501	21.5298	12.1682	14.6238	18.3804	5.95956	5.24667	5.06039	4.96942	5.06195	5.40872	5.45589	5.83181	5.68892	4.9651	5.16125	5.38867	5.66949	5.68191	5.84948	5.91319	5.98998	5.58244	5.43249	5.26138	5.63999	5.34016	5.37124	5.58551	5.10568
AHNAK	1075.87	1020.27	869.565	750.677	1105.13	1166.72	695.03	446.288	267.1	927.299	894.803	1132.16	1312.22	1124.87	1098.41	1115.22	1143.88	912.337	949.359	823.731	1103.95	1109.3	1069.84	889.496	9.80481	9.73612	9.49488	9.41382	9.8338	9.60658	9.63081	9.27206	8.78012	9.61643	9.55977	10.0294	10.2308	10.0481	10.0786	10.1038	10.1595	9.79898	9.86724	10.1287	10.3367	10.1722	10.5489	9.74299
AHNAK2	1111.59	956.484	829.162	737.417	1212.69	1120.98	943.453	651.686	256.438	1001.2	559.953	1308.61	1207.13	1239.86	1448.29	1270.42	1472.8	1219.18	1350.42	668.151	823.051	592.469	783.547	443.54	9.85751	9.64969	9.43661	9.39184	9.96693	9.5293	10.0526	9.74801	8.72721	9.72551	8.93831	10.2472	10.082	10.2021	10.4841	10.3216	10.5117	10.2426	10.4291	9.80143	9.95455	9.25443	10.0933	8.79206
AHR	33.4508	46.3428	44.1363	40.4283	66.1001	123.283	91.3103	90.9683	255.874	54.3049	43.7277	37.8675	41.8642	42.1751	39.054	47.025	36.6714	34.9092	42.1781	35.7527	45.9206	42.4838	46.7828	52.1588	5.80534	6.05793	6.06431	6.00703	6.31208	6.61811	6.97142	7.21188	8.72498	6.16391	5.99406	5.80756	5.89496	5.91092	5.8957	5.97155	5.82047	5.81461	5.94207	6.02789	6.22172	6.00915	6.34907	6.20337
AHRR	0.438167	-2.58926	-2.88855	-3.63216	-0.624823	-2.40512	-2.10121	3.51451	-0.626566	4.38412	0.305451	3.34524	-3.747	0.425442	-9.32532	1.09683	-2.27988	-3.05269	-2.3803	-2.29325	-1.0561	5.70048	-0.224787	-7.39741	4.92699	4.83789	4.83364	4.81615	4.90546	4.85889	4.85878	5.07382	4.90308	5.05353	4.93801	5.01691	4.79581	4.92632	4.63367	4.96081	4.84688	4.81756	4.83946	4.83077	4.89921	5.10361	4.92112	4.69666
AHSA1	1158.64	1234.77	1303.77	1138.84	1078.52	2490	2142.43	2391.45	2840.53	1090.71	1024.65	1113.17	1230.77	1068.38	1093.56	1020.71	882.949	863.119	736.119	368.983	556.288	814.771	409.283	782.673	9.92142	10.0018	10.0677	9.97813	9.80255	10.6603	11.1148	11.3725	11.5148	9.84775	9.76758	9.99667	10.1181	9.96455	10.0729	9.96584	9.75677	9.71193	9.49282	8.93375	9.41005	9.70195	9.19611	9.56148
AHSA2	112.882	102.15	100.624	130.79	138.813	1053.72	694.646	648.904	270.531	162.344	192.551	229.217	299.016	231.248	204.379	169.798	254.103	177.371	227.055	202.025	310.165	288.954	308.514	265.155	6.86853	6.77161	6.79511	7.14764	7.0849	9.43409	9.62977	9.74383	8.79395	7.31746	7.54408	7.76239	8.0991	7.79658	7.70323	7.36302	7.96	7.51507	7.82871	8.09285	8.59475	8.23301	8.80463	8.10426
AHSG	-0.472523	-3.68438	-1.91156	-1.97607	-2.06944	0.776248	-4.27711	0.563811	-1.16291	-6.60828	-2.09627	-2.42794	-2.67051	0.278973	-2.31593	-6.277	-2.79277	-2.58704	-0.306353	-3.70102	-9.25797	-2.57695	-1.74391	-2.52944	4.89545	4.80357	4.8655	4.87077	4.85886	4.93985	4.78327	4.95993	4.88129	4.7187	4.86443	4.83913	4.83074	4.92096	4.86028	4.72919	4.82902	4.83328	4.90606	4.78197	4.62934	4.84478	4.87271	4.8462
AHSP	12.2319	6.78054	11.3271	8.21774	14.7712	6.91655	5.10133	3.99337	9.10866	20.0507	11.8945	10.3856	13.155	5.34275	6.72233	7.51259	13.778	8.81823	14.9355	23.9584	6.58823	6.6468	2.22528	20.535	5.29369	5.13355	5.28392	5.19765	5.34955	5.0818	5.1089	5.09135	5.36882	5.48918	5.28354	5.21314	5.29047	5.07591	5.1343	5.14191	5.30816	5.18486	5.34072	5.71685	5.1512	5.13374	5.0021	5.53436
AICDA	-2.1722	6.02788	0.567367	5.86027	4.55977	3.30136	7.20634	3.72311	1.23539	4.58078	1.27872	-4.01489	13.4184	1.29238	2.84577	-1.92535	5.16245	0.668766	4.19262	9.40779	4.13662	2.78757	2.13869	-6.53977	4.83602	5.11133	4.94322	5.12292	5.06257	5.00166	5.18589	5.08141	4.97559	5.05998	4.96657	4.78574	5.29764	4.95392	5.01951	4.86563	5.07478	4.93896	5.0477	5.22616	5.06695	5.01195	4.99917	4.72336
AIDA	894.684	787.865	805.034	732.287	623.213	943.138	423.359	319.241	278.46	767.435	847.044	932.234	954.261	900.85	930.929	866.903	938.44	876.621	812.009	471.029	332.493	581.258	270.3	496.032	9.54643	9.38588	9.39184	9.38482	9.05423	9.28818	8.94974	8.8342	8.82867	9.35722	9.4872	9.72191	9.73725	9.71068	9.84924	9.74383	9.85172	9.73446	9.62372	9.29394	8.68817	9.22643	8.61448	8.9369
AIF1	9.86175	7.84787	11.0222	10.6539	10.1307	13.2789	5.60191	6.85162	8.99664	11.4268	6.60908	16.0939	8.49489	7.70556	12.7835	7.91664	6.98524	17.2768	12.7135	1.40623	4.86094	7.67505	6.44012	7.85986	5.22564	5.16774	5.27442	5.27301	5.2236	5.21614	5.12631	5.20629	5.36182	5.26491	5.12856	5.34842	5.16367	5.14412	5.30087	5.15314	5.12679	5.41492	5.28365	4.95543	5.09057	5.16741	5.14877	5.16049
AIF1L	207.607	210.831	205.709	205.085	213.078	157.511	62.1337	42.7557	24.0364	188.127	130.054	106.323	131.316	108.052	104.424	110.231	112.506	104.483	114.358	97.457	123.553	109.038	99.532	137.667	7.64958	7.68105	7.67413	7.71934	7.63588	6.90039	6.53677	6.36593	6.06179	7.49898	7.03589	6.7534	6.99996	6.79462	6.82346	6.79643	6.86706	6.82306	6.91537	7.10884	7.36764	6.94219	7.26129	7.24631
AIFM1	158.184	157.109	168.55	153.236	153.345	181.053	81.8171	52.8138	40.6244	142.441	160.357	120.53	141.781	130.368	126.67	119.532	130.311	112.24	125.467	82.3273	105.425	130.367	84.4107	142.07	7.28256	7.30489	7.43234	7.33591	7.22085	7.07855	6.83247	6.59134	6.53459	7.15293	7.29963	6.8928	7.09131	7.00445	7.06237	6.89693	7.04031	6.91592	7.02519	6.90209	7.16428	7.17437	7.02154	7.283
AIFM2	35.3495	29.8239	25.7171	25.1998	45.5548	78.8599	43.5571	54.4715	29.362	37.625	38.8316	114.256	135.602	112.6	101.804	114.067	84.8175	72.4873	62.895	15.9245	25.3834	39.988	20.7577	30.8755	5.84115	5.72959	5.67287	5.67887	6.00455	6.19976	6.20261	6.62149	6.22172	5.87823	5.9042	6.83598	7.03432	6.83681	6.79886	6.83635	6.54966	6.43425	6.27706	5.4543	5.74908	5.96011	5.66746	5.78443
AIFM3	14.0331	6.79596	0.690963	7.70641	6.65344	13.7333	6.82214	5.88167	8.77026	3.82678	7.92113	15.9285	25.7053	22.5837	25.9619	29.4303	13.9455	13.273	22.3512	10.8907	15.1826	13.0028	15.7312	5.34115	5.34683	5.13397	4.94742	5.18194	5.12197	5.2253	5.17137	5.16726	5.3492	5.03643	5.16628	5.3445	5.58194	5.50772	5.62694	5.6446	5.31249	5.31229	5.52709	5.27953	5.4435	5.32599	5.48594	5.08747
AIG1	136.185	146.923	137.901	123.547	142.489	177.266	81.1274	53.0851	43.8913	119.094	125.939	238.896	191.704	212.987	146.226	119.863	182.609	157.594	145.521	106.404	163.859	102.373	183.13	224.188	7.09076	7.20749	7.17383	7.07902	7.12018	7.05221	6.82134	6.59673	6.60605	6.92935	6.99681	7.82279	7.51099	7.67801	7.24944	6.90117	7.51241	7.3562	7.22521	7.2188	7.75338	6.87132	8.0724	7.89121
AIM1	119.887	145.264	110.76	112.421	128.563	196.411	80.4626	62.061	33.9014	140.472	114.874	107.796	104.295	93.5683	80.8217	68.6888	91.4666	55.9194	83.8832	73.7016	85.2094	109.357	60.2062	109.241	6.93578	7.19202	6.90039	6.96271	6.99099	7.18015	6.81198	6.75516	6.3557	7.13552	6.89387	6.76854	6.72084	6.62658	6.54151	6.29771	6.62914	6.19778	6.56572	6.75692	6.87132	6.9455	6.60328	6.95669
AIM1L	34.7382	32.6739	19.8017	19.5328	29.1418	28.8545	31.6611	26.1365	11.6962	15.3162	18.4813	42.0513	38.5109	41.3672	35.5782	38.2787	30.9299	30.7683	24.1953	35.2801	74.0619	34.8535	74.2603	34.16	5.82823	5.79082	5.52651	5.53346	5.68388	5.5144	5.95313	5.93345	5.51397	5.37026	5.45737	5.87999	5.83161	5.89389	5.83652	5.82205	5.70673	5.73227	5.57315	6.01757	6.70637	5.86696	6.85235	5.85699
AIM2	60.2242	72.6211	89.1452	67.9847	72.9826	61.9041	19.1071	14.9736	10.4268	66.9952	58.1196	55.1797	71.0378	56.4677	60.8301	41.064	38.0778	46.6078	42.4776	44.0393	75.9225	63.0302	50.1663	72.1679	6.26054	6.44839	6.67515	6.45447	6.40218	6.01072	5.60711	5.56525	5.4435	6.3463	6.22172	6.10578	6.32877	6.13777	6.27311	5.87261	5.84921	6.03538	5.94659	6.214	6.73488	6.36109	6.42131	6.50573
AIMP2	4963.52	5015.56	5498.95	4546.14	4475.59	4999.34	2546.01	1290.06	964.908	4617.77	4442.29	3981.3	3816.18	3751.29	3611.27	3259.49	3308.38	3242.49	3059.53	2251.79	2333.97	3152.69	1802.63	3512.24	12.0146	12.0437	12.1341	12.0379	11.9354	11.7152	11.3979	10.6084	10.2255	12.0146	11.9673	11.9222	11.8103	11.8152	11.7698	11.6896	11.7469	11.6673	11.6545	11.4824	11.4586	11.7212	11.2932	11.7612
AIP	412.042	385.252	392.361	351.008	356.449	478.885	347.76	475.42	695.448	350.061	442.151	451.781	480.543	455.137	428.941	459.384	381.562	375.47	385.015	329.243	316.572	337.32	222.149	337.599	8.51987	8.43565	8.46994	8.41115	8.30578	8.36927	8.7057	9.34558	9.86724	8.31012	8.61773	8.69625	8.73864	8.71726	8.70588	8.75948	8.53065	8.5385	8.56799	8.77691	8.62134	8.45632	8.33588	8.42388
AIPL1	2.05259	0.868786	4.6639	2.68258	0.160787	4.10017	1.50204	1.31169	3.34475	3.12121	4.29092	-0.889662	3.42034	-0.989147	3.76945	3.04385	3.40533	-3.81347	1.38127	2.88326	3.80542	6.54128	2.28328	5.13813	4.98068	4.95007	5.07601	5.02028	4.93121	5.02038	4.98411	4.98863	5.06206	5.01641	5.05826	4.88829	5.02131	4.87949	5.0459	5.01819	5.02406	4.79165	4.95933	5.00597	5.05621	5.13073	5.00404	5.08113
AIRE	1415.98	1259.4	940.545	1308.68	1628.89	2751.74	2075.49	2090.69	1801.51	1739.82	1858.69	2040.64	2251.49	2435.51	2854.98	2288.79	2033.12	2433.63	2125.47	2503.21	2420.4	2274.26	2409.95	1964.46	10.1752	10.0406	9.60272	10.1899	10.4001	10.8003	11.073	11.2304	10.9306	10.5349	10.6427	10.9105	11.0094	11.1721	11.4278	11.1812	11.0174	11.2423	11.1379	11.6502	11.5071	11.2139	11.6285	10.8536
AJAP1	8.90323	-0.447697	5.79665	3.83091	1.75184	3.07217	4.44647	0.349514	1.17287	2.89455	4.1843	7.5064	0.428327	1.16344	3.62947	-0.15483	1.4999	3.83476	0.478132	5.24683	5.8065	0.557083	-0.23456	3.64271	5.19788	4.90831	5.11133	5.05683	4.97904	4.99676	5.08646	4.95132	4.97312	5.00893	5.05514	5.13812	4.92813	4.9495	5.04246	4.92205	4.96668	5.03777	4.9313	5.08618	5.12496	4.94165	4.92069	5.03577
AK1	48.5807	44.5026	43.0965	39.4381	40.7488	43.2781	20.4572	19.8622	20.9445	32.9567	40.5556	44.7485	56.8143	43.4102	45.1838	47.6837	36.3983	38.1026	33.4661	29.5667	22.3855	23.9457	16.2789	28.7566	6.09035	6.02609	6.04498	5.98929	5.92962	5.75538	5.64807	5.7368	5.93991	5.77746	5.94143	5.93448	6.13058	5.93179	6.01976	5.98306	5.8134	5.87634	5.77396	5.87195	5.66188	5.61277	5.50624	5.74195
AK2	544.013	566.658	633.233	514.448	492.129	570.806	261.274	181.901	212.235	509.604	483.706	370.835	378.456	361.502	326.043	322.728	349.55	371.865	351.265	266.387	232.035	322.079	174.892	362.784	8.87928	8.94171	9.0831	8.90313	8.72362	8.59629	8.32083	8.09737	8.48596	8.81868	8.74673	8.40592	8.42694	8.39892	8.32768	8.26042	8.40208	8.52483	8.42814	8.46813	8.2003	8.39738	8.01739	8.52094
AK3	591.604	493.098	549.851	483.384	473.572	545.925	310.136	237.896	179.278	585.519	447.124	554.702	592.149	576.129	616.164	649.09	614.822	663.032	604.14	405.782	312.234	369.835	294.173	328.236	8.98392	8.75948	8.90028	8.82223	8.67376	8.54454	8.54906	8.46509	8.27959	9.00482	8.63701	8.98692	9.05088	9.05174	9.23137	9.26459	9.21004	9.34558	9.20361	9.07802	8.60116	8.57256	8.72437	8.39017
AK3L1	373.401	343.194	370.862	330.547	325.148	324.971	120.834	75.2365	69.3108	373.086	328.199	316.612	310.923	305.205	261.84	261.772	299.461	258.433	247.784	171.702	156.526	246.281	119.015	227.578	8.39289	8.29167	8.40271	8.33216	8.19061	7.86011	7.33591	6.97142	7.13552	8.39809	8.23844	8.18636	8.1602	8.18081	8.03834	7.97355	8.19181	8.04466	7.95085	7.8875	7.69353	8.02524	7.50427	7.91086
AK5	-1.21592	-4.07447	-3.68518	0.10075	-1.00248	-2.07671	1.3791	-1.66168	0.157461	-1.2441	-4.11127	-2.249	0.339569	-0.647427	-3.86036	-0.0532241	-5.47262	-1.25928	-2.05235	-1.13499	-0.32745	-1.05324	-2.86883	0.127681	4.86861	4.78971	4.80665	4.9378	4.89373	4.86801	4.9801	4.87398	4.93349	4.88468	4.79993	4.84432	4.9251	4.89123	4.81238	4.92501	4.74192	4.87625	4.85031	4.87007	4.92298	4.89227	4.83696	4.93001
AK7	-2.8583	-2.6956	-4.04022	-2.64561	-0.407141	-7.46673	0.549896	-0.622766	-3.48595	-4.46112	-2.90741	-3.01059	-3.62219	-2.28974	-2.20046	-5.3357	-1.47607	-3.28779	-4.52137	-6.61508	1.94558	2.58677	-5.03989	-2.40712	4.81401	4.83468	4.79555	4.84796	4.91376	4.71915	4.95144	4.91285	4.79371	4.78721	4.83921	4.82013	4.80079	4.83667	4.86374	4.75817	4.87494	4.80932	4.77142	4.67947	4.99697	5.00616	4.76252	4.84996
AKAP1	45.001	37.0487	33.2433	39.0645	66.5938	64.3484	16.9477	5.56497	4.30565	46.0242	45.5853	31.4059	44.3521	38.9363	25.8637	26.5083	22.7246	27.092	29.6079	36.176	31.8872	52.3569	39.4614	105.477	6.02399	5.87972	5.84084	5.98212	6.3186	6.03778	5.53395	5.15427	5.10606	6.02946	6.02577	5.6897	5.9383	5.84453	5.62355	5.57832	5.52299	5.65119	5.69439	6.0411	5.92709	6.19724	6.18492	6.91257
AKAP10	45.6641	57.3136	43.5546	36.5551	61.644	102.41	69.0193	73.4968	50.2214	45.7607	60.9095	61.3411	52.6084	54.6915	39.1189	60.359	49.2469	35.9561	54.3101	34.163	35.9517	71.696	43.6799	36.3364	6.03416	6.23442	6.0524	5.92847	6.24972	6.44248	6.64371	6.9455	6.74163	6.02609	6.26505	6.19945	6.0647	6.11248	5.8981	6.17607	6.0415	5.83528	6.1464	5.98862	6.01936	6.48859	6.28188	5.9042
AKAP11	112.499	99.2322	78.8959	81.8264	83.6257	120.285	28.2594	15.8236	6.36878	108.472	102.578	124.409	107.986	101.016	88.8207	106.737	124.918	93.8944	93.8515	94.83	89.1981	108.975	96.4111	117.959	6.8653	6.7405	6.55563	6.62247	6.53539	6.59292	5.86524	5.59891	5.21314	6.81259	6.77161	6.93738	6.7534	6.70791	6.64144	6.76105	6.97823	6.70742	6.69025	7.06742	6.9319	6.94164	7.21451	7.05433
AKAP12	23.4344	12.8166	17.2597	17.8409	18.2962	70.5407	40.8863	12.6452	9.25929	17.7521	14.2141	9.82741	11.4249	11.4643	10.1097	10.6975	13.6451	11.4744	19.8841	8.05538	6.62878	13.7869	1.78751	13.2375	5.57683	5.31331	5.45108	5.48888	5.43783	6.10509	6.15241	5.45773	5.37661	5.42994	5.34425	5.19991	5.24351	5.24138	5.22901	5.22207	5.30466	5.26067	5.46991	5.18109	5.15268	5.34842	4.98784	5.32709
AKAP13	310.83	319.563	228.848	241.441	324.031	378.253	359.052	253.366	228.416	214.496	208.906	276.716	239.975	242.532	294.726	326.786	238.065	184.3	215.382	225.733	188.73	247.631	197.341	192.59	8.15298	8.19434	7.79909	7.9251	8.18347	8.05446	8.74673	8.55672	8.58254	7.68658	7.64714	8.01891	7.80771	7.8597	8.20528	8.27905	7.86884	7.5739	7.74594	8.24501	7.93588	8.03352	8.18121	7.68874
AKAP14	-1.22279	-1.22141	-2.90365	-3.08158	-4.29781	-2.67502	-4.00449	-2.6656	0.747145	-5.38609	-4.18711	-1.67111	-0.800183	-0.107047	-4.23968	1.87567	-4.42926	-3.41656	-4.31883	-3.40784	-1.18264	-2.5895	-3.1183	-3.13677	4.86838	4.88282	4.83338	4.83452	4.78949	4.85278	4.79449	4.83682	4.95667	4.75864	4.79763	4.86284	4.89091	4.90875	4.79958	4.98416	4.77385	4.80529	4.77773	4.79264	4.89517	4.84446	4.82864	4.82886
AKAP2	0.667301	8.07476	-3.30072	4.35818	2.52094	0.0392183	0.894005	2.03247	0.827345	5.59843	0.195114	-0.952818	4.70881	6.38537	4.64629	3.30654	2.02188	-3.65544	6.65312	6.7392	5.47839	9.40824	5.25899	1.76759	4.93417	5.1757	4.81899	5.07413	5.00276	4.92183	4.96295	5.01691	4.95938	5.09249	4.93512	4.88639	5.05954	5.10717	5.07188	5.02584	4.98342	4.79687	5.11923	5.13839	5.11384	5.21721	5.10966	4.97919
AKAP3	2.30113	-4.57612	0.242408	-2.84167	2.12944	3.85595	-2.15595	-1.71725	-2.59286	-5.68806	-1.47958	-3.92681	-6.84503	-2.79393	-6.7186	-3.43609	0.00524145	-2.72747	-1.18676	0.249812	-4.50745	1.87652	-3.90121	2.2755	4.98891	4.77385	4.93398	4.84161	4.99096	5.01496	4.85671	4.87182	4.82585	4.74767	4.88353	4.78872	4.69666	4.81909	4.71888	4.81652	4.91953	4.82804	4.87841	4.91602	4.78773	4.98311	4.80223	4.99388
AKAP4	1.56005	0.634879	-0.670416	3.02886	0.0263152	0.931107	-0.859077	-0.0412205	-0.232788	0.254397	-0.462166	3.80478	1.25811	0.666246	0.649427	-0.398841	0.894247	-0.123938	0.307119	2.87661	-1.34124	2.87503	1.9472	-0.416445	4.96499	4.94208	4.90406	5.02988	4.92683	4.94391	4.90239	4.93603	4.91769	4.92896	4.91428	5.03042	4.95468	4.93417	4.95183	4.91432	4.94718	4.91242	4.92545	5.00577	4.88998	5.01442	4.99296	4.91226
AKAP5	-4.18176	-4.33683	-3.17054	-3.80937	2.31891	-3.10381	-7.57025	-1.73267	1.68438	10.7899	2.15733	0.476877	4.77707	1.93055	-4.00407	-4.41009	-10.1654	-3.17628	-9.26661	-3.6396	-0.606442	-1.53675	-5.21169	-9.43727	4.76675	4.7819	4.82373	4.81064	4.99607	4.84108	4.66963	4.87104	4.99194	5.24578	4.99216	4.9305	5.06168	4.9727	4.80761	4.78848	4.59213	4.81319	4.61629	4.7839	4.91322	4.87783	4.75543	4.63636
AKAP6	9.32256	9.44831	5.55934	2.86642	2.31419	10.8247	7.46715	8.43909	3.99849	10.7816	-0.0376585	-0.568899	-0.772303	-2.11972	-0.515655	-3.33362	-1.19694	-4.75522	0.49249	5.27962	-1.67617	1.21209	-3.69871	1.90932	5.21082	5.21467	5.10385	5.02524	4.99582	5.16518	5.19404	5.27569	5.09249	5.24548	4.92748	4.89813	4.89155	4.84178	4.91714	4.82092	4.88297	4.76245	4.93177	5.08756	4.87881	4.96111	4.80895	4.98347
AKAP7	12.1736	13.6718	12.8679	11.8953	8.21396	10.2547	3.76418	4.70378	2.22474	17.0766	14.791	15.0471	16.8533	17.5884	14.0998	16.1377	15.7012	17.1363	15.5697	2.90947	6.84402	3.55971	1.64512	5.04483	5.29159	5.33921	5.32893	5.31565	5.169	5.15491	5.06282	5.1183	5.01481	5.41267	5.36005	5.32218	5.37789	5.39635	5.3331	5.35311	5.35603	5.41057	5.35685	5.00682	5.16083	5.03669	4.98329	5.0777
AKAP8	146.93	152.595	117.614	136.452	188.577	157.706	77.5339	90.4941	66.5336	218.597	164.727	110.519	122.941	153.769	120.002	146.815	141.341	126.456	123.58	95.5229	83.8308	154.703	69.4216	136.303	7.18986	7.26096	6.98077	7.20015	7.48144	6.90117	6.77612	7.2033	7.08291	7.71818	7.34078	6.79838	6.91223	7.23417	6.99163	7.15902	7.16126	7.07361	7.00261	7.07959	6.84913	7.40927	6.7667	7.23284
AKAP8L	101.159	80.5566	63.6763	71.9591	91.1569	175.05	148.964	117.843	141.118	108.565	84.5341	134.501	158.458	160.261	187.927	161.673	132.403	156.686	151.643	109.485	127.653	134.762	122.833	110.302	6.74207	6.54438	6.37033	6.50519	6.62736	7.03779	7.60875	7.56359	7.99818	6.81521	6.56735	7.02474	7.23984	7.2818	7.58792	7.29741	7.06573	7.34756	7.28737	7.26032	7.41171	7.21606	7.54156	6.96784
AKAP9	3.10603	1.97252	0.372833	1.22992	0.381212	10.2044	6.75072	6.91639	0.515405	3.3557	4.0392	8.55991	5.81482	-0.831234	2.76788	1.86841	2.865	1.45946	3.67462	1.28832	1.67931	0.7047	6.88681	2.60677	5.01518	4.98471	4.93738	4.97282	4.93771	5.15383	5.169	5.20956	4.94797	5.02321	5.05063	5.16501	5.09312	4.88425	5.01674	4.98392	5.00919	4.9637	5.03088	4.95029	4.98817	4.94653	5.16507	5.00389
AKIRIN1	161.246	169.831	175.256	174.921	191.355	216.066	169.792	244.496	239.212	236.698	204.814	192.037	166.942	175.061	178.864	191.462	186.395	179.864	166.842	126.136	102.563	135.275	106.788	130.749	7.3027	7.40517	7.48054	7.50525	7.49761	7.31962	7.76587	8.50661	8.64165	7.80582	7.62358	7.51706	7.31175	7.404	7.52418	7.53969	7.52744	7.53389	7.42107	7.45788	7.12941	7.22289	7.36486	7.18332
AKIRIN2	504.163	478.143	466.444	467.792	545.412	760.532	501.667	608.711	956.999	487.587	503.825	498.718	498.846	541.999	420.786	571.785	481.732	466.912	468.229	186.256	248.752	368.08	206.258	309.669	8.77382	8.72362	8.6858	8.78538	8.86789	8.99483	9.17535	9.66733	10.2137	8.75465	8.79455	8.81968	8.79704	8.97022	8.68022	9.07365	8.84548	8.83274	8.83772	7.98685	8.2882	8.56459	8.23881	8.31472
AKNA	31.2175	34.1071	33.8587	33.658	43.8288	75.5285	47.3352	33.6091	26.468	54.7221	27.3099	50.2794	50.2157	49.004	52.1578	72.9126	51.1106	44.5122	48.0677	23.2674	46.4812	44.7829	34.0243	24.9182	5.75509	5.82143	5.85574	5.86597	5.97744	6.16168	6.2736	6.16243	6.13436	6.17026	5.6665	6.02479	6.03416	6.01551	6.13102	6.35689	6.07338	6.00081	6.04841	5.692	6.23007	6.05554	6.05734	5.64756
AKNAD1	0.675449	4.69749	8.77603	9.99293	11.1084	10.5097	4.66281	5.45391	16.2111	5.35216	7.4303	17.7152	-1.41096	8.07127	10.3892	7.79656	6.76314	12.5913	8.3136	9.9093	1.77317	5.3583	4.85025	11.9409	4.93444	5.06947	5.2044	5.25328	5.25035	5.15928	5.0946	5.15035	5.7317	5.08537	5.1537	5.38385	4.87126	5.15391	5.23679	5.14985	5.11984	5.29104	5.16282	5.24422	4.99161	5.0928	5.09412	5.28505
AKR1A1	607.612	597.482	629.011	557.179	598.983	713.805	364.297	287.758	232.694	638.615	573.924	498.538	490.731	481.574	416.336	454.156	523.362	539.311	604.326	416.085	507.915	496.639	435.785	544.337	9.01579	9.01846	9.069	9.00822	8.99367	8.89564	8.77306	8.71373	8.60548	9.12394	8.97154	8.81868	8.7695	8.79395	8.66274	8.74388	8.97368	9.03764	9.20527	9.10538	9.28144	8.98243	9.2755	9.05595
AKR1B1	977.478	1214.97	1282.88	1073.83	924.237	1974.83	1278.88	1302.81	1418.14	1126.13	1145.59	1949.02	1871.27	1775.65	1845.18	1838.87	1677.78	1734.57	1678.73	1104.67	878.807	1032.43	563.442	1016.53	9.66388	9.98295	10.0481	9.90588	9.58863	10.3424	10.4208	10.6273	10.6825	9.91117	9.93173	10.8365	10.7383	10.692	10.827	10.8441	10.7051	10.7507	10.7581	10.528	10.0225	10.0606	9.6417	9.91615
AKR1B10	23.3315	16.2244	19.212	20.4147	12.8898	30.5221	13.6188	5.50718	9.42485	17.8054	8.52765	51.6213	52.9542	52.4938	52.6375	62.8989	50.001	53.9548	44.0103	12.4412	32.0996	3.16864	19.3651	14.2169	5.57585	5.40619	5.51004	5.55579	5.29732	5.54599	5.41717	5.15223	5.38519	5.43128	5.18557	6.04638	6.07338	6.07155	6.14209	6.21495	6.05383	6.1673	5.9756	5.34016	5.9328	5.02432	5.62273	5.35721
AKR1B15	10.5478	22.861	9.88179	28.2236	13.8899	38.4826	28.8457	13.541	11.7056	9.12489	5.58849	29.9044	19.9149	23.6822	13.3879	30.6747	23.7964	17.9427	21.0065	15.4799	19.8869	8.23159	13.4389	8.77597	5.24615	5.57774	5.23961	5.74216	5.32674	5.67782	5.8812	5.49758	5.51418	5.19682	5.09581	5.65819	5.44833	5.53366	5.31601	5.67448	5.55087	5.43265	5.49605	5.43881	5.5853	5.18385	5.40114	5.18932
AKR1C1	-2.98441	-1.29425	-9.63803	-3.7588	-1.74386	-3.73104	-1.47662	-6.16099	-3.81404	-7.29813	-3.83604	5.55261	-4.40119	-7.66137	-7.01736	0.287576	-7.01051	-3.46468	-7.67002	-4.78205	-3.4084	-11.5936	0.521177	-0.978516	4.81016	4.88062	4.6176	4.81264	4.8706	4.82425	4.87983	4.70901	4.77978	4.69584	4.80882	5.08148	4.77657	4.66282	4.70716	4.93509	4.69078	4.80389	4.67396	4.74165	4.82282	4.54463	4.94637	4.89492
AKR1C2	24.7526	23.4599	27.9536	21.3727	25.7072	58.2121	54.6056	68.8701	39.1135	22.6678	15.2654	106.17	131.668	114.723	135.932	147.458	126.96	132.951	115.107	58.8361	10.7028	8.55097	9.16012	8.20412	5.61095	5.59107	5.72771	5.58033	5.60961	5.97054	6.40571	6.86759	6.49205	5.55294	5.37295	6.75059	7.003	6.8583	7.16086	7.1637	6.999	7.14523	6.92151	6.50263	5.29338	5.19161	5.25286	5.1704
AKR1C3	394.059	379.757	329.577	353.378	359.575	803.675	539.346	609.113	597.051	325.057	223.237	848.7	787.206	847.782	748.035	686.556	808.97	695.483	640.119	186.56	135.219	122.097	60.5963	108.496	8.46449	8.42096	8.24837	8.41769	8.31826	9.0729	9.26108	9.66996	9.71445	8.21515	7.73952	9.60915	9.46126	9.61563	9.51569	9.37151	9.61188	9.4193	9.29043	7.98998	7.49028	7.08535	6.61267	6.94757
AKR1C4	-2.80871	0.803043	-2.84921	0.766473	-0.70851	10.0379	-0.652923	-4.43272	-1.18559	-9.49445	-0.731071	-1.82736	2.07303	-4.90039	-4.34163	6.75202	-6.40274	0.581677	0.41821	-0.552274	-1.89592	-2.91665	2.04999	1.82853	4.81582	4.94779	4.83486	4.95822	4.90288	5.15062	4.90989	4.77151	4.88025	4.61629	4.9063	4.85818	4.97984	4.75504	4.79548	5.12106	4.71003	4.93575	4.92948	4.88983	4.87166	4.83536	4.99578	4.98106
AKR1CL1	3.33488	-2.50116	2.6542	4.20589	2.1368	2.60175	3.08367	1.89098	4.08902	-0.871544	-3.50563	0.13801	1.76665	-1.58794	2.71188	-0.870551	5.08794	3.88237	1.29183	-1.39844	1.42088	1.68919	2.74682	0.481995	5.02296	4.84127	5.0121	5.06959	4.99119	4.98552	5.03849	5.01154	5.09662	4.89596	4.81999	4.9195	4.96954	4.85935	5.01466	4.89959	5.07274	5.03935	4.95674	4.86139	4.97971	4.97713	5.02136	4.94144
AKR1D1	4820.67	4317.55	4081.72	3940.49	4600.81	5883.09	5474.28	5367.23	4377.95	4469.33	4771.23	5002.6	6132.34	5698.37	6781.52	5710.22	4922.81	5482.14	4974.25	6125.15	5921.96	5532.97	6065.7	5110.38	11.9673	11.8591	11.6896	11.8152	11.9788	12.0088	12.4239	12.5129	12.0146	11.9536	12.0909	12.2587	12.5052	12.4305	12.7021	12.522	12.3875	12.4852	12.3875	12.8683	12.7961	12.5376	12.957	12.3521
AKR1E2	9.32617	22.8169	2.58916	9.4484	10.7408	22.5114	4.24235	9.83152	2.9475	6.79874	6.49844	5.10816	12.6721	9.0729	15.9581	17.8748	12.3338	13.3506	10.1138	9.666	14.0393	12.3459	8.50423	7.41795	5.21092	5.57683	5.00982	5.23748	5.23989	5.40134	5.07876	5.33349	5.04412	5.12631	5.12478	5.06964	5.27785	5.17929	5.38046	5.39513	5.26897	5.31364	5.21467	5.23502	5.40344	5.30579	5.22933	5.14869
AKR7A2	601.744	611.715	663.426	579.837	587.739	723.723	307.451	253.639	210.109	581.134	605.384	445.696	429.047	490.052	436.391	387.801	376.344	405.313	440.953	290.249	358.158	410.572	260.565	486.7	9.00207	9.05088	9.14275	9.0612	8.97022	8.92279	8.53594	8.55791	8.47223	8.99194	9.0444	8.67229	8.58136	8.81868	8.73262	8.50778	8.50778	8.64165	8.75299	8.59569	8.80331	8.72643	8.56101	8.91181
AKR7A3	114.89	127.986	154.989	116.107	148.663	201.453	72.5483	47.333	59.3354	142.982	124.783	119.405	114.331	104.746	100.017	90.0385	83.3217	93.8972	88.4529	61.3837	80.4797	128.89	72.9322	117.428	6.89042	7.02799	7.31906	6.99681	7.17934	7.21379	6.698	6.47806	6.93848	7.15981	6.98544	6.87979	6.82179	6.75252	6.78064	6.56683	6.53347	6.70791	6.62573	6.55232	6.80015	7.16031	6.83308	7.04802
AKR7L	-4.58367	-0.871182	-1.63601	-3.31126	0.918878	-3.09398	12.0926	8.20937	-2.31869	-4.18462	-1.6516	4.109	-0.673533	6.0018	2.78841	2.70731	-1.74283	5.00003	-0.739298	6.90615	-1.33151	9.39967	5.94555	5.41172	4.75504	4.89373	4.87454	4.8267	4.95396	4.8414	5.36124	5.26537	4.83667	4.79505	4.87858	5.03945	4.89488	5.09471	5.01758	5.00797	4.86528	5.07349	4.89223	5.14371	4.89034	5.217	5.13244	5.09008
AKT1	753.658	818.197	767.744	766.092	840.255	757.057	477.018	337.497	264.381	727.323	715.09	683.66	699.219	680.107	760.857	695.555	599.84	631.031	650.704	519.592	480.386	672.654	422.424	556.281	9.32066	9.43409	9.33559	9.44143	9.46032	8.99134	9.10939	8.90396	8.76628	9.28898	9.26996	9.28462	9.29815	9.29304	9.54028	9.39282	9.16619	9.26586	9.32066	9.43317	9.20361	9.44031	9.2381	9.07959
AKT1S1	28.6627	26.5904	27.9267	22.277	28.3698	59.0893	25.1312	45.8607	62.1812	28.7492	20.0655	32.6217	26.6929	23.7553	28.9182	28.4536	23.856	22.5784	28.0777	18.4508	15.2511	25.3742	14.6978	23.2491	5.70164	5.66526	5.72711	5.5999	5.6687	5.98058	5.78984	6.44439	7.00213	5.69	5.49716	5.71297	5.60405	5.53477	5.69117	5.62498	5.55161	5.54045	5.65885	5.54148	5.44638	5.64945	5.44727	5.60354
AKT2	-0.985333	9.54638	2.06094	-5.41031	4.87582	1.17108	-1.92505	1.40965	-1.80461	2.18262	7.97807	3.22094	1.72634	5.4326	8.38333	0.753442	6.89485	1.47027	-2.4018	3.56535	-2.47896	-5.07037	-2.05326	-5.242	4.87711	5.2173	4.99379	4.75823	5.07132	4.94969	4.86412	4.99255	4.85539	4.98636	5.16799	5.01359	4.96827	5.07862	5.17947	4.94954	5.12402	4.96389	4.83863	5.02879	4.85385	4.76888	4.86161	4.76167
AKT3	3.83662	1.5752	4.67401	2.1938	5.79865	5.27623	3.57469	1.64765	1.87393	3.95567	2.37953	2.97875	3.6773	5.55344	3.17412	1.36445	3.65281	2.29385	3.47261	3.49562	2.54975	-0.823985	2.98908	5.44861	5.03953	4.97153	5.07639	5.00393	5.09807	5.04625	5.05638	5.00215	5.00037	5.04052	4.99903	5.00586	5.02869	5.08212	5.02859	4.96923	5.03144	4.98954	5.02539	5.02635	5.01562	4.89921	5.03047	5.09099
AKTIP	116.02	112.608	121.106	106.158	122.292	185.156	90.5863	78.8368	53.4855	124.117	126.094	174.366	185.484	179.372	147.444	160.105	169.486	156.503	162.887	95.4128	120.165	96.195	94.6586	145.878	6.90381	6.87932	7.01549	6.89195	6.92706	7.10474	6.96038	7.02519	6.81942	6.97865	6.999	7.37746	7.4659	7.44423	7.26096	7.28214	7.41001	7.34617	7.38735	7.07664	7.32977	6.79931	7.18156	7.31906
ALAD	42.6622	47.2693	51.9818	43.8916	36.6611	45.4695	16.4958	23.7934	9.23675	47.0133	46.5543	66.6673	73.2882	61.8449	48.675	53.3081	62.197	51.1263	50.1589	33.3108	53.8303	45.8195	40.0313	52.5267	5.98026	6.07629	6.20219	6.0731	5.85394	5.78881	5.51893	5.86425	5.37478	6.0504	6.0439	6.2763	6.356	6.22214	6.08045	6.06849	6.23888	6.11679	6.07861	5.96756	6.37321	6.07779	6.19877	6.20877
ALAS1	16.978	10.2671	7.16659	14.7853	17.2601	18.3644	11.9687	19.5897	18.9877	18.7511	15.6491	22.8402	20.0348	33.0272	19.5351	24.6576	24.9203	17.4366	16.8103	15.5004	7.26025	17.1445	10.7257	13.612	5.42632	5.24028	5.15391	5.40434	5.41528	5.31987	5.35663	5.72932	5.86321	5.45483	5.3832	5.50486	5.45075	5.7317	5.4669	5.54084	5.57534	5.41916	5.39215	5.43943	5.17732	5.4425	5.31308	5.33984
ALAS2	4.29933	3.59282	-0.476108	4.14657	-0.29284	-0.226425	1.05588	-0.668036	0.999675	0.66629	1.25175	0.387758	-0.250666	-0.498849	-3.7735	3.81654	0.259593	-0.531287	0.995458	4.01583	0.982484	-1.54784	0.688854	1.58204	5.05621	5.0334	4.91079	5.068	4.91751	4.91508	4.96852	4.91107	4.96648	4.94242	4.96583	4.92742	4.90834	4.89596	4.81538	5.04024	4.92683	4.89927	4.94751	5.04524	4.96554	4.87743	4.95161	4.97307
ALB	17.3136	16.7651	17.8157	14.722	19.2496	28.4137	28.2191	46.1441	97.9809	26.3585	15.7053	36.9788	35.1997	33.9847	39.8751	48.497	51.9909	54.4293	38.5296	20.6307	29.9022	16.2593	29.0594	12.6908	5.43287	5.42089	5.46991	5.40188	5.46211	5.5057	5.86351	6.45083	7.57209	5.63882	5.38407	5.79231	5.76995	5.75113	5.91203	5.993	6.08827	6.17607	5.87363	5.61214	5.87488	5.41667	5.92073	5.31091
ALCAM	747.644	628.891	577.764	564.382	655.943	1025.33	499.803	329.146	221.619	763.263	702.613	548.085	585.441	570.466	420.494	475.078	594.082	502.222	529.534	511.979	693.028	615.418	627.937	945.42	9.30922	9.08953	8.95977	9.0242	9.10939	9.39282	9.17126	8.87014	8.53489	9.34753	9.24425	8.96493	9.03712	9.03712	8.67852	8.81477	9.15483	8.93888	9.00207	9.40825	9.71939	9.31437	9.79528	9.82103
ALDH16A1	58.5448	67.3614	59.4942	76.4624	90.0089	130.595	92.9704	73.1612	42.1598	71.3154	88.279	78.2182	65.1171	82.1676	101.589	104.623	92.4702	68.9642	76.7679	63.7388	67.1207	115.44	70.1665	71.2106	6.23857	6.3798	6.31457	6.55785	6.61184	6.68642	6.99126	6.93808	6.56968	6.4016	6.61356	6.41711	6.25119	6.48408	6.79562	6.73287	6.64165	6.38819	6.47565	6.58978	6.5976	7.01598	6.78064	6.49205
ALDH18A1	550.09	493.86	503.483	503.571	424.06	461.516	216.55	138.391	72.0032	499.522	592.033	419.054	418.628	409.013	267.046	347.1	386.462	360.971	450.707	324.212	387.128	414.212	277.427	579.582	8.89481	8.76152	8.78538	8.87301	8.5353	8.32768	8.07889	7.7631	7.18957	8.78809	9.00566	8.58796	8.54388	8.57179	8.07463	8.35662	8.5476	8.48332	8.79051	8.75465	8.90729	8.74133	8.64884	9.13264
ALDH1A1	10.8695	8.87658	6.3764	0.847837	3.45368	16.571	1.42882	-0.0792823	2.27246	10.6627	3.98663	-2.13471	1.90192	-0.183094	2.02782	-2.53671	0.510624	0.174629	-0.852061	2.57681	7.91876	1.99955	3.14254	3.79781	5.25591	5.19898	5.12982	4.96073	5.03114	5.2824	4.98175	4.93451	5.01669	5.24292	5.04909	4.84784	4.97419	4.90603	4.99304	4.84661	4.93471	4.922	4.88889	4.99547	5.20159	4.98746	5.03596	5.04113
ALDH1A2	-2.65703	5.96555	0.0820425	0.613328	0.874151	0.344512	0.234856	1.7164	-0.162695	0.537895	1.64398	3.55007	-0.641726	1.99746	0.679959	2.53027	-0.563759	1.13461	1.4712	6.19698	0.849377	1.74235	6.59502	0.0677147	4.82097	5.1085	4.9294	4.95388	4.95268	4.92933	4.94086	5.00441	4.92061	4.93801	4.9766	5.02242	4.8959	4.97444	4.95332	5.00278	4.90135	4.95408	4.96221	5.11787	4.9615	4.97883	5.15471	4.92804
ALDH1A3	1254.18	1232.69	1182.67	1374.89	1370.42	1457.1	661.902	371.07	224.735	1738.1	1155.1	922.803	1041.42	1036.98	868.906	1117.19	1149.77	1061.81	1118.37	654.452	443.817	948.286	375.444	774.29	10.0376	9.99667	9.93377	10.2627	10.1339	9.91272	9.56148	9.02563	8.55098	10.5327	9.94428	9.7087	9.85751	9.91697	9.73866	10.1074	10.1649	10.0438	10.139	9.76981	9.08713	9.92645	9.08047	9.54643
ALDH1B1	229.839	229.433	232.169	213.306	216.138	226.894	34.7138	16.2917	8.6361	225.367	183.06	175.846	161.731	154.044	171.07	132.958	137.917	118.01	122.106	121.561	116.987	162.641	85.0258	176.295	7.7704	7.7805	7.81841	7.77143	7.6615	7.38398	6.0227	5.61748	5.34142	7.75098	7.4809	7.3886	7.26754	7.23654	7.45458	7.03325	7.12177	6.97823	6.98887	7.404	7.29554	7.47981	7.03197	7.58481
ALDH1L1	-3.97059	0.412098	4.25038	-4.24757	-5.18453	-3.66274	4.59947	4.26163	1.13772	2.17918	-6.69402	6.29874	-1.91388	-0.945271	4.66705	4.26539	0.265236	-2.20365	-1.86715	1.92953	0.101322	-6.02328	2.98954	-1.5355	4.77394	4.93546	5.06307	4.7956	4.76055	4.82622	5.09238	5.10106	4.97192	4.98596	4.71732	5.10196	4.85546	4.88075	5.0727	5.05288	4.92704	4.84644	4.85684	4.97335	4.93664	4.73828	5.03053	4.8774
ALDH1L2	0.985332	5.5075	11.0918	-0.300498	4.97694	21.7009	6.40469	4.72513	3.80618	3.16097	3.57479	18.1671	22.8821	10.463	14.2764	8.59665	17.155	9.1569	18.4784	13.2228	7.42225	6.48058	5.97646	0.174789	4.94573	5.09435	5.2768	4.92407	5.07413	5.38407	5.15596	5.11949	5.0832	5.01751	5.03649	5.39408	5.5147	5.21644	5.33728	5.17016	5.39335	5.1944	5.43696	5.36675	5.1824	5.12884	5.13355	4.93088
ALDH2	128.643	119.095	121.469	100.519	112.461	378.73	477.865	527.444	418.055	102.088	82.8541	362.553	302.494	294.915	290.849	286.247	320.209	295.997	285.35	118.156	93.6569	82.1697	75.9353	76.3684	7.02154	6.94103	7.01953	6.82831	6.84168	8.05766	9.11173	9.47598	9.30518	6.75252	6.55003	8.37895	8.11724	8.13266	8.18909	8.10019	8.27905	8.22193	8.14804	7.35989	7.00261	6.63318	6.88563	6.56287
ALDH3A1	271.128	347.819	330.589	304.353	319.387	275.162	152.365	109.727	63.9462	258.05	212.941	419.096	502.4	529.477	456.258	549.072	469.002	450.541	468.247	188.749	265.167	144.589	146.128	142.37	7.9789	8.30844	8.25433	8.21928	8.16416	7.65397	7.63588	7.46943	7.03589	7.9165	7.67334	8.58964	8.80538	8.92695	8.79541	9.01753	8.80977	8.78236	8.83834	8.00925	8.37851	7.3137	7.76812	7.28629
ALDH3A2	288.767	266.64	261.031	238.488	254.679	238.664	127.208	103.398	59.8953	265.058	230.2	306.222	333.645	302.329	290.857	292.013	278.185	249.696	232.152	122.722	181.237	206.319	153.775	205.763	8.05656	7.96667	7.965	7.9116	7.86495	7.45529	7.40599	7.39277	6.95182	7.95282	7.78015	8.1431	8.25502	8.16673	8.18959	8.12796	8.0907	7.99728	7.8567	7.41633	7.88387	7.78588	7.84067	7.78015
ALDH3B1	105.191	112.178	97.5464	100.539	113.689	118.555	84.1593	43.6469	32.1439	111.662	73.951	167.174	155.718	156.35	192.427	166.762	152.224	171.085	140.672	98.2751	123.944	77.4871	119.925	87.3069	6.78881	6.87536	6.76364	6.82881	6.85613	6.57751	6.8693	6.38922	6.30058	6.85001	6.4393	7.32764	7.21841	7.25271	7.62172	7.33792	7.25941	7.4719	7.18193	7.11984	7.373	6.57089	7.51241	6.69898
ALDH3B2	78.628	78.4561	71.3415	56.5732	71.0027	82.4123	27.9836	15.9572	6.80986	59.3814	34.9499	21.0428	21.1478	17.8917	23.343	24.389	14.018	14.4202	19.8552	25.5173	61.5913	21.1592	59.9106	30.5716	6.49972	6.519	6.46405	6.29402	6.37585	6.24334	5.85953	5.60438	5.23628	6.24146	5.83049	5.46576	5.47662	5.40511	5.56169	5.53617	5.31422	5.3425	5.46847	5.76616	6.50825	5.54868	6.59673	5.77823
ALDH4A1	15.4789	23.0094	17.9926	18.9051	24.4302	30.4456	18.9622	13.2052	4.22321	16.9739	28.9159	34.7564	26.5143	26.996	26.3932	29.7162	17.443	25.0107	17.2383	10.6352	14.8297	15.4108	12.902	15.5762	5.38498	5.58064	5.47612	5.52076	5.57896	5.54415	5.60297	5.48474	5.10196	5.40937	5.7022	5.74881	5.60051	5.6055	5.63821	5.65085	5.40098	5.59531	5.40344	5.27205	5.43128	5.39494	5.38185	5.39494
ALDH5A1	12.1619	9.6815	9.42661	13.0708	9.57663	12.1442	3.5406	1.72642	2.75183	16.2211	9.4035	9.2057	15.3203	9.52383	8.68126	14.5509	9.79702	6.89173	10.7028	6.62959	9.98212	4.495	2.64174	6.40966	5.29145	5.22376	5.22518	5.35322	5.2086	5.1921	5.05447	5.00481	5.0363	5.38957	5.21121	5.18184	5.3425	5.19186	5.18879	5.31473	5.20513	5.13104	5.23017	5.13387	5.26869	5.06617	5.01782	5.11932
ALDH6A1	9.29986	4.72845	7.37131	2.89483	4.5244	12.7299	5.48424	6.144	5.4181	4.95076	6.0213	13.7189	17.5125	13.1975	14.8044	14.3168	16.6973	9.81265	16.0796	4.56441	7.21637	5.44565	6.5251	7.27293	5.21011	5.07031	5.15963	5.02595	5.0611	5.204	5.12197	5.17639	5.15827	5.07132	5.10973	5.2918	5.39408	5.2846	5.35001	5.30899	5.37983	5.2157	5.37124	5.06254	5.1757	5.09548	5.15268	5.14472
ALDH7A1	314.914	313.085	359.641	353.705	359.523	349.078	157.222	107.101	78.0527	307.688	426.674	453.247	467.751	427.939	418.383	456.429	406.285	437.594	447.603	388.629	430.589	519.365	377.8	487.899	8.17092	8.16336	8.36101	8.41815	8.31766	7.95221	7.67055	7.43174	7.2858	8.15616	8.56857	8.70194	8.70335	8.63731	8.6708	8.75056	8.61448	8.74613	8.77837	9.01364	9.05031	9.05595	9.08953	8.9165
ALDH8A1	11.22	11.3118	10.1569	6.86097	16.1919	22.657	18.301	17.9574	14.5632	11.023	12.6577	22.6234	20.5637	16.4549	27.0173	20.9666	20.6029	24.3607	22.8474	24.9696	22.0971	21.0208	26.9458	14.7062	5.26508	5.26952	5.24917	5.15706	5.38759	5.40379	5.58017	5.67605	5.65346	5.25338	5.30617	5.50027	5.46047	5.37026	5.65293	5.46047	5.47612	5.58033	5.53872	5.74699	5.65387	5.54438	5.86268	5.37383
ALDH9A1	2248.52	2143.83	2330.71	2272.64	2164.67	2421.46	1406.41	1092.04	771.395	2332.98	2211.84	1878.92	1932.01	1908.17	1717.84	1980.91	1949.38	1733.41	2007.46	1088.15	1068.35	1369.48	792.272	1445.72	10.8731	10.8113	10.921	11.0322	10.8003	10.6084	10.5489	10.4077	9.96584	11.0063	10.905	10.7686	10.7904	10.8155	10.7246	10.966	10.9493	10.748	11.0322	10.5076	10.282	10.4901	10.1038	10.4096
ALDOA	1230.14	1391.72	1382.94	1221.62	1131.32	1097.46	666.086	644.964	936.236	1219.31	1133.32	1084.8	1079.48	1015.79	945.055	895.912	934.876	899.276	896.3	435.963	660.594	816.464	451.154	803.606	9.99894	10.1768	10.1429	10.0959	9.87471	9.49827	9.57101	9.73321	10.1883	10.017	9.9088	9.96302	9.90982	9.87046	9.87761	9.78817	9.84339	9.77391	9.77525	9.1737	9.65062	9.70361	9.32915	9.59589
ALDOB	5.05171	2.49329	8.16206	6.44825	6.11064	22.5632	10.9292	11.329	11.5655	6.27898	4.23236	10.8525	16.295	18.5691	8.93347	9.44631	9.37666	9.12409	3.64119	7.17057	4.85527	6.3868	8.32226	6.42181	5.08141	5.00089	5.18405	5.14254	5.10666	5.40242	5.31876	5.39706	5.50624	5.11133	5.05627	5.2235	5.36623	5.4207	5.1963	5.1905	5.19481	5.19335	5.03024	5.15217	5.09044	5.12615	5.21965	5.11998
ALDOC	465.147	474.531	533.919	474.137	404.696	389.169	221.657	231.348	285.218	364.972	384.828	611.801	596.424	591.536	497.727	438.479	517.62	476.243	508.03	234.538	366.87	281.091	250.957	330.17	8.67376	8.71502	8.86429	8.80463	8.47223	8.09139	8.10144	8.42694	8.86275	8.37495	8.44832	9.12097	9.06549	9.08953	8.92346	8.69968	8.95145	8.86586	8.94549	8.29483	8.83079	8.19838	8.5103	8.39542
ALG1	77.3086	78.6461	72.3763	62.0836	76.4438	61.6543	33.7756	16.9582	9.47353	81.1261	102.003	57.3913	52.7815	38.7214	27.6326	35.9432	52.6532	40.7707	43.1675	30.987	83.3386	64.7286	63.7843	132.056	6.48629	6.52252	6.48102	6.37841	6.45042	6.00915	6.00372	5.63999	5.38829	6.52224	6.767	6.14248	6.06849	5.83975	5.66431	5.78471	6.09907	5.92879	5.96122	5.90788	6.83872	6.38524	6.66415	7.1973
ALG10	35.9748	33.9335	32.2835	24.9755	32.0211	59.0723	36.7491	22.9386	9.04145	31.8681	53.2983	36.6788	44.4624	48.1257	31.7927	31.5559	33.946	29.7021	32.9375	25.2876	51.4676	29.0216	43.4489	62.968	5.85281	5.81852	5.81942	5.6733	5.7517	5.97992	6.06731	5.83771	5.36518	5.75447	6.14846	5.78554	5.93991	6.00372	5.75481	5.69326	5.76924	5.70569	5.76584	5.76065	6.32658	5.73122	6.27493	6.36977
ALG10B	25.0135	25.348	26.412	20.2392	21.9816	41.5199	21.545	12.8133	8.33069	25.2164	33.0921	35.9612	38.0625	44.4615	20.413	26.2228	36.7431	28.5691	32.6588	22.3441	45.2141	28.0207	36.5696	49.0171	5.61636	5.63467	5.69391	5.55161	5.52995	5.72605	5.68642	5.46408	5.32399	5.6185	5.79231	5.76995	5.82143	5.94686	5.48853	5.57335	5.82233	5.68569	5.75874	5.66323	6.20555	5.71077	6.11577	6.14967
ALG11	58.2818	50.9295	48.0541	48.8507	68.7828	112.363	77.9494	78.8784	60.8531	55.6711	76.8596	66.0818	67.8053	64.226	67.8949	51.6201	86.6959	74.6984	79.2571	51.9976	54.1944	45.2487	50.5849	82.5701	6.23391	6.13505	6.13058	6.16354	6.3484	6.52956	6.78209	7.02555	6.97142	6.18357	6.475	6.26591	6.28388	6.25663	6.37009	6.03909	6.56996	6.46782	6.50874	6.38271	6.37919	6.06372	6.42784	6.64276
ALG12	28.2663	35.3414	21.3921	37.4636	37.9883	63.2017	32.547	22.4534	14.7995	17.0101	29.0931	44.3663	24.2866	34.0618	25.2235	33.9447	36.5253	27.0663	26.6866	23.9144	24.8657	23.6218	26.3173	34.1046	5.69391	5.84431	5.57247	5.94978	5.88171	6.02644	5.97279	5.82259	5.66495	5.41039	5.70673	5.92636	5.54823	5.75289	5.61066	5.74454	5.8149	5.65055	5.63024	5.71484	5.73582	5.60634	5.84057	5.85621
ALG13	295.263	304.005	335.15	314.732	275.02	291.164	143.248	131.928	194.161	262.377	250.58	159.056	180.992	168.403	113.835	138.538	157.571	148.514	172.098	86.9355	75.5733	116.419	49.9915	133.189	8.08224	8.13024	8.27373	8.26172	7.9657	7.72634	7.55749	7.70323	8.37433	7.94087	7.88986	7.25535	7.43174	7.35025	6.91681	7.08642	7.31231	7.28256	7.45529	6.96176	6.72901	7.02828	6.41803	7.20898
ALG14	134.027	127.033	159.416	116.789	122.775	89.6621	50.7857	44.2334	47.894	120.352	114.396	116.27	112.786	85.2605	69.3786	74.6552	83.6696	89.25	96.9495	44.0697	61.9207	60.7482	47.0191	137.916	7.06806	7.01508	7.35802	7.00213	6.93138	6.32054	6.33648	6.40435	6.69176	6.93946	6.88775	6.85235	6.80258	6.5256	6.38963	6.37776	6.53677	6.654	6.72034	6.21429	6.51309	6.32697	6.35526	7.24846
ALG1L	259.065	246.303	276.561	248.962	254.243	242.148	99.0882	52.7039	41.5445	276.795	252.774	215.484	204.671	204.064	239.63	205.864	224.675	219.718	218.59	173.992	247.968	183.607	191.411	230.201	7.92459	7.86884	8.03439	7.96417	7.86447	7.47683	7.07083	6.5886	6.55593	7.99677	7.90269	7.68225	7.59297	7.62424	7.92219	7.63946	7.78142	7.81071	7.76935	7.90269	8.28439	7.64113	8.13223	7.92787
ALG2	15.6163	14.6534	22.1088	16.0012	20.3103	22.9829	16.8173	23.9687	26.0646	19.2425	18.4741	16.1449	11.8444	14.5216	16.4926	15.1042	14.4887	17.2809	13.4083	9.10553	11.7349	6.42487	10.7547	18.2255	5.38924	5.3658	5.58887	5.44164	5.49152	5.4102	5.53121	5.86978	6.11894	5.46597	5.45716	5.35049	5.25364	5.32095	5.39494	5.32877	5.32845	5.41505	5.29916	5.2139	5.32796	5.12713	5.31364	5.47017
ALG3	756.424	883.477	1043.7	735.112	712.794	877.998	514.767	279.479	276.852	693.048	858.458	975.759	1047.37	942.66	769.939	592.622	806.648	757.51	741.92	587.701	911.58	616.981	758.046	1144.76	9.33105	9.53948	9.75677	9.38824	9.22643	9.198	9.20263	8.67279	8.81968	9.22543	9.50701	9.78426	9.86724	9.76758	9.55977	9.12769	9.60723	9.53035	9.50276	9.61361	10.0756	9.31865	10.0526	10.0786
ALG5	331.241	342.609	367.959	333.909	396.406	513.307	238.685	151.487	131.575	345.85	468.56	432.493	442.669	365.548	301.382	296.408	375.79	336.932	335.391	237.594	307.862	271.63	205.516	607.511	8.23037	8.28882	8.39336	8.34603	8.45072	8.46391	8.19747	7.87694	7.91329	8.29755	8.70843	8.63255	8.61976	8.41928	8.24133	8.14709	8.50468	8.38769	8.36442	8.31419	8.57928	8.15134	8.23414	9.19206
ALG6	239.714	237.259	244.543	185.721	205.685	302.479	130.109	62.8825	28.5756	226.721	324.831	305.395	355.587	286.485	210.095	226.712	306.765	222.978	179.467	154.131	355.755	242.063	306.403	435.881	7.82534	7.82481	7.88514	7.58671	7.58481	7.77088	7.44079	6.76488	6.19911	7.76239	8.223	8.14067	8.33856	8.0907	7.74008	7.76268	8.22591	7.82572	7.51993	7.74395	8.79541	7.99818	8.79206	8.77306
ALG8	461.636	520.194	526.151	411.267	538.714	619.393	334.576	164.159	113.355	487.884	552.669	752.004	773.235	702.515	574.138	501.377	601.214	579.134	513.964	421.305	799.938	389.477	730.032	892.826	8.66274	8.83079	8.84327	8.61574	8.85005	8.6967	8.65011	7.97117	7.73616	8.75543	8.91882	9.43039	9.43946	9.34322	9.13264	8.88893	9.17016	9.13821	8.95893	9.12677	9.91871	8.65114	9.99784	9.7472
ALG9	298.905	278.489	339.309	267.688	312.106	355.407	189.883	96.8366	77.0291	247.219	338.328	392.053	435.916	352.178	283.135	260.654	332.392	282.402	260.603	200.353	421.711	247.303	409.04	567.576	8.10019	8.02729	8.29011	8.0496	8.13165	7.97617	7.90049	7.2983	7.27137	7.8597	8.26954	8.49117	8.60365	8.37101	8.15343	7.96767	8.32483	8.15694	8.02573	8.08321	9.0242	8.03155	9.19432	9.10615
ALK	13.6638	7.6853	13.0824	7.27243	11.4699	8.96133	5.85932	3.88849	6.43303	14.9455	11.033	7.57944	-2.62585	8.62217	7.31002	6.66373	8.50735	8.30825	7.73346	7.20999	5.45035	11.0627	6.4004	11.5177	5.33907	5.16314	5.33614	5.16863	5.26122	5.12707	5.13425	5.08707	5.21744	5.36005	5.25722	5.14016	4.83213	5.16706	5.15044	5.11826	5.1704	5.16918	5.14785	5.15322	5.11266	5.26784	5.14735	5.27113
ALKBH1	60.0415	55.7533	62.7464	50.4296	61.4541	86.5025	51.4485	65.5063	74.6837	72.4236	65.9404	65.6289	71.974	63.6787	53.307	74.6354	59.9533	65.9657	61.1121	43.9852	34.3766	52.8882	24.0187	55.8339	6.25705	6.2116	6.358	6.19314	6.24634	6.29034	6.34668	6.81295	7.23284	6.41422	6.32739	6.25976	6.34098	6.25059	6.15174	6.37692	6.20775	6.34543	6.24835	6.21196	5.98095	6.20413	5.77628	6.26132
ALKBH2	374.68	374.814	352.847	322.743	349.113	298.331	125.857	58.0564	40.305	316.049	293.188	212.114	244.971	204.685	192.981	189.345	177.643	168.223	163.439	159.693	174.419	278.101	147.043	259.549	8.39809	8.40062	8.34015	8.30578	8.27848	7.75618	7.38948	6.6832	6.52464	8.18277	8.08379	7.65561	7.83631	7.63005	7.62594	7.52418	7.48189	7.4499	7.39403	7.78935	7.83416	8.18409	7.77827	8.07688
ALKBH3	239.343	230.172	218.166	201.945	195.489	344.767	156.819	144.197	111.32	222.803	198.798	261.712	250.543	235.88	236.788	235.636	254.315	215.191	201.757	114.783	113.694	145.341	89.8388	126.713	7.82333	7.78473	7.73763	7.70149	7.52744	7.93983	7.6673	7.81888	7.71008	7.73708	7.58711	7.94272	7.86401	7.82229	7.9074	7.81888	7.96134	7.78327	7.66023	7.32009	7.26129	7.32067	7.10996	7.14171
ALKBH4	51.1336	56.8765	62.9149	52.8275	52.092	33.07	21.0671	17.6221	12.9905	65.8392	57.6583	49.7749	58.2966	42.7443	55.4694	49.189	54.1598	42.4403	41.8914	36.7827	34.4511	29.8959	31.4381	41.8685	6.13464	6.22761	6.35985	6.23357	6.11679	5.58931	5.66991	5.66409	5.57879	6.3308	6.21463	6.01714	6.15476	5.92141	6.18831	6.00251	6.12584	5.95866	5.93616	6.05793	5.98352	5.75223	5.99074	6.01345
ALKBH5	3532.3	3392.54	3562.81	3427.55	3295.13	3365.59	1816.63	1598.73	2060.91	3294.48	3220.56	2751.77	2925.63	2785.3	2993.38	2930.36	2734.14	2865.62	2806.88	2010.31	1992.82	2608.14	1593.26	2538.58	11.51	11.489	11.5423	11.6325	11.4383	11.0855	10.905	10.9189	11.1089	11.5029	11.5148	11.3331	11.4044	11.3944	11.489	11.5237	11.455	11.4824	11.5278	11.3725	11.191	11.4519	11.0995	11.2556
ALKBH6	144.68	141.24	119.267	154.999	157.302	251.535	190.389	148.05	64.6137	112.133	136.385	238.722	270.577	254.529	241.949	261.023	195.658	190.964	197.992	124.802	181.45	135.457	135.229	146.712	7.17067	7.15342	6.9943	7.35211	7.25318	7.53168	7.90543	7.84927	7.04758	6.85325	7.09799	7.8202	7.96718	7.92624	7.93638	7.97007	7.60617	7.61319	7.63946	7.44116	7.88514	7.22684	7.66203	7.3291
ALKBH7	40.448	60.8152	65.9274	53.193	38.8623	59.2804	30.8896	21.5992	39.6787	44.591	39.5254	84.3619	69.9247	88.0067	70.4527	76.0211	60.663	66.6916	85.1769	42.742	40.5949	38.2382	36.0665	42.1628	5.92962	6.29475	6.39782	6.23857	5.89707	5.98126	5.93307	5.79694	6.50615	6.00757	5.92036	6.49558	6.31069	6.56202	6.40072	6.39917	6.21846	6.35725	6.58449	6.18958	6.11464	5.92675	6.10365	6.01891
ALKBH8	41.0888	21.6078	26.3032	30.1013	32.3652	36.3548	13.9806	10.0944	4.68874	31.2971	28.6452	33.4612	24.0029	27.1883	32.5201	40.5401	27.8856	37.4069	32.1606	30.0449	14.1902	28.8194	25.3167	17.7176	5.94601	5.54778	5.6897	5.78666	5.76035	5.64969	5.42942	5.34616	5.12285	5.74412	5.69586	5.7282	5.54239	5.60858	5.76892	5.86268	5.63703	5.86381	5.74991	5.88399	5.40896	5.72791	5.81367	5.4566
ALLC	-0.653187	1.54855	-2.09804	-2.02174	-4.95637	-2.17584	-0.450223	-4.07192	-0.0443619	-2.0009	2.88511	-2.88907	-3.61526	0.633818	-2.06593	-1.5534	1.71682	0.835257	-0.470329	-2.03683	-2.60607	0.117012	-0.67812	0.750318	4.8896	4.97037	4.86028	4.86912	4.7688	4.86593	4.91707	4.78589	4.92549	4.86135	5.01542	4.82302	4.80109	4.93306	4.86796	4.87777	4.97343	4.94416	4.90078	4.83997	4.8495	4.92745	4.90712	4.94916
ALMS1	31.7608	35.2072	19.9164	26.114	37.9286	42.1344	22.4262	17.2739	5.83952	39.4025	37.191	49.8027	41.3734	47.4487	50.389	49.3135	42.2834	38.3683	49.1902	35.852	34.4937	49.8023	39.7231	34.028	5.76869	5.84115	5.52961	5.69766	5.8804	5.73539	5.70925	5.65262	5.18128	5.91428	5.87062	6.01781	5.88665	5.99371	6.10578	6.00455	5.92364	5.88074	6.06509	6.03107	5.98534	6.14771	6.1917	5.85506
ALMS1P	6.3831	4.2275	4.75254	6.07062	7.28781	7.61	6.39397	7.31524	2.01098	8.92687	9.8508	5.10533	11.5579	10.339	10.433	13.8123	6.24978	11.6438	8.24597	13.4416	10.3113	13.8631	7.01103	22.6153	5.12089	5.05362	5.07851	5.12924	5.13904	5.09807	5.15546	5.22822	5.00568	5.19153	5.22481	5.06938	5.24709	5.21347	5.23832	5.29702	5.10505	5.26645	5.16125	5.37247	5.27907	5.3508	5.1704	5.58637
ALOX12	-4.13037	4.65048	6.41127	-1.30991	2.29699	5.59865	-3.9695	1.05451	-2.39057	0.48555	1.43472	0.561441	-1.94753	4.47605	-5.71227	-5.29565	2.93651	5.90761	2.63467	-0.534818	-0.00272001	0.0139384	-3.94776	-0.413284	4.76842	5.06773	5.13033	4.89236	4.99534	5.05316	4.79567	4.97934	4.83396	4.93607	4.97089	4.93311	4.85394	5.05052	4.75331	4.75896	5.01079	5.10209	4.9998	4.89037	4.93299	4.92495	4.80008	4.91235
ALOX12B	7.69777	8.65183	7.30819	8.43022	-1.28869	-0.17783	13.4638	0.214522	3.21618	5.10888	-0.0339277	1.16276	-2.34538	-1.14378	4.03546	-0.90982	2.51567	-4.50345	4.75879	-1.30695	-0.387425	6.76257	0.313399	0.222786	5.16358	5.19284	5.15819	5.20491	4.88497	4.91615	5.40979	4.94642	5.05632	5.07653	4.92755	4.95206	4.84094	4.8745	5.05452	4.89837	4.99802	4.77121	5.06538	4.86408	4.9214	5.13835	4.93919	4.93265
ALOX12P2	6.35463	7.32232	8.56863	5.9969	11.6295	44.6008	30.3201	26.7217	30.7966	17.2946	13.7917	36.4606	29.5434	23.4148	26.2002	23.7554	30.7782	24.7431	27.2034	27.6763	47.8695	35.6711	55.3126	33.2092	5.12007	5.15112	5.1973	5.12687	5.26491	5.77593	5.91763	5.95171	6.25911	5.41835	5.33364	5.78053	5.65184	5.52709	5.63241	5.52361	5.70253	5.58816	5.64271	5.82047	6.26032	5.88074	6.51237	5.83771
ALOX15	1.96566	-0.914761	3.27571	4.46619	5.66684	4.20208	0.779577	2.53048	1.31018	2.84113	4.86926	2.5478	3.08888	5.24291	2.62154	4.16497	1.18807	3.24281	0.657913	2.16161	3.19913	3.2854	2.76662	4.29643	4.9781	4.89227	5.03081	5.07807	5.09379	5.02239	4.95954	5.03561	4.97825	5.00746	5.07539	4.99417	5.0115	5.07333	5.01165	5.05045	4.95629	5.01926	4.9365	4.98114	5.03703	5.02782	5.02219	5.05456
ALOX15B	2.2801	0.135283	2.74202	2.52518	2.95761	0.810087	1.80742	-1.49739	-0.28985	4.62236	-1.39599	0.125605	1.34645	0.166917	-0.554748	0.793214	-2.10722	-0.232329	-1.0768	2.6943	1.69986	1.62401	0.941178	1.49862	4.9884	4.92611	5.0145	5.01461	5.01649	4.94057	4.9953	4.87987	4.91553	5.06084	4.88615	4.91904	4.9571	4.91702	4.91573	4.95103	4.85338	4.90843	4.88162	4.99934	4.9888	4.97497	4.95977	4.97035
ALOX5	4.41819	4.1425	3.648	1.98072	0.0258307	5.38578	10.7033	0.864523	2.31528	7.38673	2.71432	0.267492	10.4878	3.74745	-0.529304	3.33471	2.72666	4.0617	4.57026	5.94617	3.88921	6.37337	1.99983	3.66709	5.05993	5.05162	5.04324	4.99658	4.92678	5.04818	5.30934	4.97203	5.01879	5.14587	5.01053	4.92348	5.21632	5.02828	4.91658	5.02694	5.0053	5.04497	5.05993	5.10909	5.05902	5.12551	4.99437	5.0364
ALOX5AP	-1.42544	-0.105015	-2.45424	0.0719161	6.76885	6.12952	1.64186	-3.83225	-2.03051	-2.7102	2.74448	9.63076	5.55776	5.96969	3.55522	4.52821	14.3537	16.6798	18.6828	11.8252	11.9525	13.9235	12.8117	12.8773	4.86126	4.91831	4.84792	4.937	5.12496	5.06473	4.98924	4.79449	4.84718	4.83913	5.01138	5.19481	5.08537	5.09365	5.04039	5.06079	5.32364	5.39759	5.44218	5.31142	5.33337	5.35288	5.37944	5.3162
ALOXE3	29.2294	23.7198	33.4825	28.6615	29.7752	637.276	963.495	598.048	344.725	25.3517	23.1828	75.5052	72.5216	78.0472	111.687	104.117	76.5489	81.1776	72.8259	32.72	15.1733	37.4373	8.38612	18.6451	5.71193	5.59552	5.84582	5.75223	5.69742	8.73479	10.083	9.65062	9.09645	5.62103	5.58134	6.38239	6.34668	6.43496	6.89693	6.72835	6.44568	6.55276	6.42022	5.95194	5.44312	5.91237	5.22314	5.48008
ALPI	26.2301	15.5619	11.0533	11.1337	26.0359	27.3523	14.0029	11.269	6.36531	11.6103	9.33261	21.6422	13.7498	11.9799	14.8511	9.52643	17.813	13.5998	10.3354	9.36261	10.4941	14.8444	15.0397	14.1992	5.6435	5.38794	5.27549	5.28905	5.61636	5.4873	5.43036	5.39408	5.21285	5.26969	5.2093	5.48032	5.30423	5.25393	5.35136	5.19255	5.41039	5.31946	5.22042	5.22425	5.28574	5.37902	5.46097	5.35633
ALPK1	5.66698	7.17968	4.28428	-0.917349	8.36511	8.05957	12.4472	12.9297	5.16399	6.60451	8.6402	62.5499	55.9096	37.4941	45.799	51.7644	46.7639	30.6038	30.6724	16.7854	27.5279	26.9343	32.9501	13.0083	5.09943	5.14673	5.06384	4.90431	5.17148	5.1079	5.37236	5.46941	5.14551	5.12032	5.18847	6.21945	6.11619	5.81686	6.0317	6.04225	6.00311	5.72959	5.71773	5.48323	5.80939	5.6881	6.03347	5.31987
ALPK2	-5.12636	-2.07056	-2.76052	-2.06668	-3.26399	-3.08676	-0.7061	-2.04102	-6.94592	0.707619	2.26981	-1.93681	-0.955798	-5.39216	-2.99228	-4.58195	-3.40894	-4.84531	-5.73639	-1.03312	-2.91931	-3.49691	1.00123	-2.33182	4.73681	4.85454	4.83763	4.86772	4.82178	4.84165	4.90766	4.85973	4.6683	4.9435	4.99573	4.85445	4.88542	4.73733	4.83855	4.7822	4.80756	4.76001	4.72997	4.87385	4.83844	4.8173	4.96192	4.85323
ALPK3	1.99188	0.832378	-1.31915	1.01238	-4.62713	2.126	-1.06787	-5.66496	3.00534	0.505104	8.21024	15.3675	-1.75409	2.64136	3.41354	-0.0519704	2.45387	-4.78223	-1.68751	2.06676	3.21005	1.04339	5.67112	-0.145805	4.97892	4.94897	4.88428	4.96575	4.77899	4.97358	4.89523	4.72668	5.04704	4.93681	5.17542	5.3317	4.86049	4.99422	5.03612	4.92513	4.99591	4.76156	4.86267	4.97825	5.03734	4.95526	5.12261	4.92121
ALPL	2.0585	-2.83398	1.41061	0.399133	-0.944365	1.3573	1.74355	0.0293336	3.23771	-5.46706	-0.432609	-4.77563	-3.88862	1.29966	8.48109	-1.13373	9.48164	-4.66681	-4.23794	-3.63012	-1.19883	2.23631	2.52623	-5.48089	4.98096	4.83069	4.97265	4.94715	4.89586	4.95421	4.99304	4.9388	5.05748	4.75566	4.91503	4.76156	4.7921	4.95416	5.18276	4.89101	5.19719	4.76547	4.7806	4.78431	4.89458	4.99578	5.01374	4.75408
ALPP	2970.31	2755.73	2003.57	2640.8	3600.29	5986.7	4165.8	3680.25	3098.58	3366.32	3281.43	3985.55	4496.6	4470.71	6288.44	5190.26	4112.02	4459.52	3976.17	4765.39	6592.17	5104.42	7235.01	5232.45	11.2901	11.1999	10.6972	11.2304	11.5992	12.0379	12.0519	12.0668	11.6094	11.5278	11.5204	11.9354	12.0088	12.0723	12.563	12.3875	12.0909	12.1608	12.0723	12.5914	12.9451	12.3926	13.179	12.4085
ALPPL2	3.67871	9.4851	4.29428	12.5462	11.2512	18.1184	7.61327	11.0725	8.76412	9.60076	3.67964	6.19652	4.64482	1.76365	4.28157	11.8793	8.41206	11.2252	10.3936	9.13368	8.0578	6.13356	8.22569	10.2882	5.03418	5.21538	5.06407	5.33661	5.25502	5.31473	5.20003	5.38532	5.34842	5.21238	5.04072	5.09886	5.05772	4.96814	5.06149	5.25065	5.16812	5.25453	5.2218	5.21504	5.20629	5.11816	5.21527	5.23531
ALS2	168.162	178.49	171.15	182.961	188.293	366.159	301.831	381.807	253.976	212.967	217.679	337.96	282.76	283.688	238.207	352.811	263.956	241.568	246.303	182.873	163.691	244.423	135.067	192.972	7.35989	7.46323	7.45174	7.57209	7.47931	8.01181	8.50415	9.06212	8.71636	7.67959	7.7081	8.28248	8.02399	8.07463	7.91694	8.38125	8.01596	7.94503	7.94297	7.96228	7.75098	8.01401	7.6589	7.69199
ALS2CL	38.6222	40.818	30.5077	35.7638	45.472	40.0605	33.1113	41.1682	5.8417	39.881	31.3431	41.7985	47.478	46.315	47.5984	58.5418	40.3526	47.8592	45.6521	39.0876	32.6864	38.8547	37.859	21.6242	5.90123	5.95774	5.77516	5.9086	6.00372	5.69984	5.98609	6.33017	5.18147	5.92268	5.75956	5.87511	5.99038	5.97255	6.06301	6.15093	5.88906	6.0593	6.0041	6.1119	5.94553	5.93882	6.14209	5.56404
ALS2CR11	0.39635	1.778	-4.1884	-3.27388	-1.25825	-7.84001	-5.78618	-3.80193	-0.809313	-4.28775	-2.40794	-0.146017	1.30487	-2.72634	6.76025	-3.61761	-2.84463	-1.64359	-8.01903	-0.391416	-3.64359	-1.59739	-5.57117	-4.53115	4.92541	4.97862	4.79035	4.8284	4.88597	4.70965	4.73046	4.79534	4.8952	4.79228	4.85501	4.91079	4.9562	4.82097	5.13511	4.81148	4.8267	4.86374	4.66282	4.89507	4.81546	4.87605	4.7435	4.78606
ALS2CR12	-0.332745	2.38802	2.57258	14.3041	-0.543211	-7.74965	-1.67162	2.32299	-2.47588	-6.5674	-2.08585	-1.66598	4.05093	5.13667	-1.57305	1.24246	-0.579552	4.69388	-1.29434	-4.15994	2.67499	0.436721	4.40849	5.21698	4.90011	4.99722	5.00923	5.39024	4.90852	4.71308	4.87284	5.02737	4.83014	4.72018	4.86497	4.86307	5.04072	5.06972	4.88292	4.9651	4.90106	5.06468	4.87475	4.76569	5.01958	4.93776	5.07967	5.08348
ALS2CR16	5.24736	4.56227	3.56664	-1.15546	0.842035	-0.61707	0.498345	-2.70087	3.69942	4.71018	2.7537	8.57836	2.30599	6.14879	-0.0740886	4.58515	3.96084	12.414	7.9769	0.747638	5.29328	8.5535	10.3762	5.26609	5.08722	5.06502	5.04045	4.89701	4.95156	4.90453	4.94974	4.83512	5.07741	5.06328	5.01169	5.16558	4.98694	5.09921	4.93012	5.06221	5.04101	5.28833	5.15383	4.93225	5.10699	5.19186	5.29635	5.0853
ALS2CR4	310.183	323.238	385.466	305.573	307.561	390.811	185.241	121.362	89.9524	358.246	445.011	334.002	316.973	281.12	221.777	284.813	356.834	294.137	300.763	245.747	230.407	285.505	213.188	425.278	8.14974	8.21059	8.44536	8.22553	8.11443	8.09559	7.87694	7.59588	7.46218	8.34303	8.62749	8.26658	8.18467	8.0613	7.81114	8.09226	8.43447	8.21219	8.21515	8.35607	8.18959	8.21816	8.28615	8.73573
ALS2CR8	2.73999	-5.14965	-1.73558	6.403	-1.11147	-5.17038	6.45907	1.07216	-4.8141	1.09985	3.48157	1.34186	2.62929	-1.81408	-5.70548	0.896676	0.656151	-4.00523	8.54063	6.21047	0.334774	0.452232	0.159544	-4.87442	5.00359	4.75572	4.87139	5.14096	4.89016	4.7844	5.15787	4.97992	4.73996	4.95487	5.03362	4.95774	4.99776	4.85163	4.75373	4.95435	4.93974	4.78574	5.17047	5.11826	4.94422	4.93829	4.93398	4.77394
ALX1	23.9471	20.6614	33.7969	23.903	17.978	42.0607	18.9326	12.3498	10.749	10.7971	20.379	21.338	18.7835	14.5048	16.7349	10.6518	11.0363	11.1639	15.2444	21.0399	10.8783	22.9038	16.5222	19.5081	5.59121	5.52517	5.85394	5.64242	5.43227	5.73357	5.60227	5.44218	5.45957	5.24615	5.50486	5.47333	5.42431	5.32044	5.40114	5.22061	5.23493	5.25277	5.34797	5.62626	5.30009	5.58985	5.51674	5.50457
ALX3	7.88568	10.5355	8.38681	-2.42763	3.89002	7.19306	0.791611	0.234503	1.06409	7.03503	4.13361	4.38668	0.503286	3.57991	4.58958	-0.40573	5.25937	16.5888	2.97899	4.71139	6.65418	6.56792	3.70605	6.98926	5.1689	5.24821	5.19114	4.85665	5.04285	5.08797	4.9598	4.94715	4.96883	5.13387	5.05399	5.04763	4.93084	5.02347	5.06978	4.91404	5.07736	5.39494	5.00975	5.06751	5.15361	5.13163	5.05581	5.13737
ALX4	-3.76561	0.348263	-1.72472	-1.97225	-3.26218	-10.3714	-1.81875	-4.3793	4.45276	-6.25389	-6.63454	-5.89541	-1.51749	-5.64619	-10.2035	-5.16389	-4.34548	-7.82091	-2.65625	-1.21382	0.515209	-1.56033	-8.40241	-4.2018	4.78234	4.93345	4.8717	4.87101	4.82206	4.64836	4.86772	4.7737	5.11234	4.73138	4.71915	4.72652	4.86742	4.72881	4.6037	4.76252	4.77643	4.65741	4.83005	4.86717	4.95012	4.87711	4.64532	4.79555
AMAC1	0.420635	1.14975	0.516792	-5.28383	-0.509802	-2.04773	3.23279	0.640135	2.52222	0.45504	-2.64835	-0.954268	2.51385	0.134579	-0.515853	-0.291305	-1.08559	3.23047	3.80262	-7.88289	-1.80446	-5.0837	1.84569	0.420235	4.92613	4.95938	4.94178	4.76257	4.91012	4.86891	5.04344	4.96272	5.0274	4.93517	4.84779	4.88629	4.99321	4.91584	4.9171	4.91751	4.88607	5.01896	5.03572	4.63825	4.87478	4.76832	4.98972	4.93923
AMAC1L2	-3.44123	-0.0662956	8.80967	0.903673	2.38983	-3.77888	-3.4204	0.0618272	0.318617	1.15016	-3.35053	-6.18651	5.61195	2.6193	3.40612	0.403772	-5.41543	-2.82526	2.53978	5.73973	-1.79343	0.536521	-0.168993	-0.483627	4.79298	4.91979	5.20513	4.96252	4.99859	4.82322	4.81408	4.94026	4.94072	4.95623	4.82544	4.71638	5.08676	4.99355	5.03585	4.93873	4.7443	4.82534	4.99726	5.10243	4.87516	4.94086	4.92314	4.91028
AMAC1L3	12.5103	20.2117	17.2455	14.8219	41.1026	34.9877	31.7525	12.559	7.58587	23.1748	27.5443	16.5652	19.7282	16.3758	15.127	13.9248	14.2125	6.56245	11.8369	15.665	13.6959	16.9682	16.7338	63.4604	5.3031	5.51418	5.45087	5.40549	5.93474	5.6245	5.95534	5.45313	5.28223	5.56755	5.67251	5.36005	5.44332	5.36861	5.35888	5.29949	5.32026	5.12093	5.26079	5.44491	5.39281	5.43822	5.52418	6.37634
AMACR	43.0559	42.8284	42.932	32.4992	37.0797	29.1488	13.7506	9.9778	3.87229	42.3573	33.414	30.5739	29.3071	19.0658	26.4449	13.5764	23.6783	23.4014	27.2553	11.8265	21.262	17.9637	15.5483	28.7223	5.98767	5.99672	6.0415	5.83748	5.86619	5.51893	5.42218	5.34037	5.08607	5.96552	5.80021	5.67112	5.64779	5.43061	5.63913	5.29089	5.54778	5.56049	5.6435	5.31159	5.62998	5.46812	5.47941	5.74167
AMBN	1.06831	4.48013	1.604	2.38169	1.41669	4.73473	5.61152	8.77373	3.10007	6.38435	0.379597	-1.59976	2.60495	0.787819	0.273457	1.72876	3.69921	7.86665	0.0455183	4.65126	1.63212	4.05382	3.27116	3.5883	4.94897	5.06217	4.97853	5.01012	4.96899	5.03515	5.12687	5.29032	5.05096	5.11384	4.94001	4.86525	4.9968	4.93725	4.94044	4.98002	5.03289	5.15652	4.91741	5.06582	4.98632	5.05187	5.04061	5.0341
AMBP	3.87651	-1.01998	0.227615	0.382379	-4.6301	-3.03661	-1.01471	-1.08905	2.23118	2.42216	0.7827	4.50571	2.35854	2.85827	6.85729	-0.873023	2.48356	-0.305744	-2.556	-2.66801	6.41912	0.854606	-0.855661	-0.83458	5.04101	4.88864	4.93365	4.94657	4.77885	4.84335	4.89664	4.89523	5.01502	4.99331	4.95149	5.05124	4.98837	5.00246	5.13844	4.89951	4.99676	4.90634	4.83376	4.81806	5.14538	4.95081	4.90068	4.89991
AMBRA1	23.5351	24.4975	23.054	18.1046	32.2871	41.5881	22.2773	45.1726	25.4633	18.5939	21.6476	36.0071	24.8527	32.9807	39.4654	33.1959	21.3491	23.7227	34.2613	16.5953	16.7813	25.067	12.8186	23.438	5.58017	5.61448	5.6139	5.49605	5.75789	5.72771	5.70494	6.42466	6.10337	5.45129	5.54207	5.77125	5.56121	5.73098	5.90506	5.7282	5.49382	5.56704	5.78826	5.47716	5.49202	5.64242	5.37966	5.60858
AMD1	415.55	365.324	452.425	387.047	428.181	266.185	114.776	100.942	126.465	486.453	366.286	195.656	212.948	233.88	178.14	190.501	249.953	228.02	235.802	175.338	145.384	232.272	106.467	228.154	8.5338	8.37153	8.64452	8.53489	8.55345	7.61182	7.26096	7.35848	7.86352	8.75238	8.38268	7.54694	7.64217	7.8095	7.51556	7.53082	7.93723	7.85922	7.87694	7.90973	7.59004	7.93408	7.35802	7.91329
AMDHD1	10.2463	7.06433	2.30025	-0.891936	2.09781	6.2787	8.57874	4.78883	-3.84572	19.433	-1.84773	3.98075	26.1803	10.1731	13.197	6.23566	8.77594	5.81342	5.15456	8.64452	5.45716	6.30871	1.72623	13.7057	5.23832	5.14285	5.00102	4.90487	4.99004	5.06813	5.23571	5.12235	4.77893	5.47159	4.87261	5.03585	5.59356	5.20823	5.31142	5.10641	5.17778	5.09867	5.07752	5.20015	5.11311	5.12352	4.98593	5.3427
AMDHD2	42.4236	48.5027	43.2067	65.3556	53.4158	76.4209	71.9802	47.1994	36.5566	62.4303	34.8612	84.1859	78.3857	69.9733	95.4376	66.4772	70.6333	51.0204	75.6787	53.4761	44.581	41.6433	36.3831	40.9113	5.97516	6.0955	6.04706	6.42466	6.14068	6.17122	6.68767	6.47464	6.4266	6.28286	5.82823	6.49205	6.42746	6.33541	6.72288	6.26631	6.36073	6.11551	6.45865	6.41129	6.19358	5.99342	6.11017	5.99743
AMELX	4.15129	0.570194	-1.63111	-2.70702	4.15059	4.81524	2.33296	-1.18442	-3.59137	-2.31667	-1.36606	1.25991	-2.93061	-4.91086	-2.59585	7.15414	-1.5091	1.35236	-2.60207	-1.1469	-2.27819	2.87307	-3.87448	-4.30975	5.0512	4.94021	4.87475	4.84597	5.04991	5.03663	5.01347	4.89223	4.78949	4.85217	4.88696	4.95519	4.8224	4.75446	4.85109	5.13195	4.87385	4.9606	4.83195	4.86966	4.86017	5.01432	4.80322	4.79165
AMELY	-3.60141	1.75639	-0.826866	2.32022	-1.47114	-3.03962	4.32724	4.78866	-2.00357	1.68164	7.14432	1.4557	6.9182	0.310902	5.39697	3.16126	7.38322	-3.65264	-2.61775	0.442164	0.0936087	-1.1164	-1.35637	0.415436	4.78713	4.9777	4.8988	5.0084	4.87929	4.84326	5.08205	5.12229	4.84807	4.97176	5.1446	4.96123	5.12144	4.92197	5.09565	5.02211	5.13751	4.79714	4.83147	4.9226	4.93613	4.8904	4.88539	4.93893
AMFR	84.6798	82.7436	93.9396	93.063	81.9441	99.8266	57.4939	64.0883	79.8285	102.852	105.233	149.713	134.046	133.764	103.901	110.499	158.45	130.357	133.876	90.7654	94.0383	76.0871	85.3708	141.436	6.56968	6.56445	6.72584	6.7405	6.51309	6.42131	6.46034	6.78752	7.31679	6.75918	6.79414	7.17159	7.02154	7.03669	6.81521	6.80177	7.32394	7.11618	7.10884	7.01103	7.00848	6.55047	7.03622	7.27674
AMH	5.27787	4.39797	5.60901	6.10203	23.0755	7.34986	3.35572	12.8533	5.25656	4.5411	6.25826	1.14576	3.98087	1.56947	7.22011	16.3674	-0.404686	0.155743	7.76883	6.11411	5.68053	1.78316	9.33564	4.24288	5.08827	5.05977	5.10541	5.13045	5.55087	5.09201	5.04789	5.46479	5.15006	5.05845	5.11774	4.95153	5.03872	4.96203	5.14805	5.35934	4.90627	4.92144	5.14841	5.11512	5.12072	4.98006	5.25892	5.05321
AMHR2	-2.60312	-4.94411	-2.06722	-0.537138	-3.67398	3.51258	7.81118	29.7744	33.3439	-4.9409	-2.81943	-0.788008	-0.319903	2.08611	-1.24414	-2.61168	0.818382	-0.126713	-3.52015	-1.93181	-3.58469	-4.20709	-5.09525	-3.61768	4.82327	4.76126	4.86126	4.91592	4.80932	5.00716	5.20738	6.04476	6.33906	4.77221	4.84214	4.89152	4.90624	4.97742	4.89356	4.84402	4.94482	4.91235	4.80377	4.84335	4.81756	4.79664	4.7601	4.81385
AMICA1	16.2286	0.25671	12.4056	10.8292	2.10608	7.3562	8.49515	3.75297	5.21098	10.1903	7.82116	4.15226	10.293	9.65863	18.3837	18.8335	11.5737	13.3277	12.4636	11.3207	13.1233	10.0276	16.4489	16.2063	5.40598	4.92992	5.3162	5.27878	4.9903	5.09249	5.23184	5.08255	5.14785	5.22916	5.16382	5.04091	5.21022	5.19594	5.43981	5.41355	5.24709	5.3134	5.27796	5.29356	5.37439	5.23606	5.51397	5.41589
AMIGO1	13.8009	15.3758	12.6735	13.5882	15.8688	17.2459	11.7912	6.94281	8.36725	8.67139	10.6362	13.2976	17.7868	13.7865	18.0554	13.2841	15.7452	14.5525	11.9644	17.6304	14.0934	12.6495	11.0864	23.7194	5.3417	5.38451	5.32364	5.371	5.37866	5.29454	5.34842	5.21072	5.32622	5.18429	5.24506	5.27965	5.39971	5.30253	5.43174	5.28382	5.35767	5.34589	5.26419	5.51285	5.40549	5.31451	5.32486	5.61636
AMIGO2	13.7208	5.35482	3.58095	5.44831	1.6936	7.13044	0.630638	4.88633	3.39338	12.4456	3.65329	1.27088	2.96878	12.4565	-1.6142	7.1822	1.48164	3.4821	9.56782	6.99219	4.52761	-1.68619	6.79125	2.25162	5.34016	5.08951	5.04082	5.10897	4.97728	5.08676	4.9544	5.12615	5.06413	5.2921	5.03958	4.95571	5.00785	5.26558	4.88144	5.13266	4.96611	5.0267	5.19911	5.14649	5.08008	4.8732	5.16155	4.99309
AMIGO3	-3.15197	-1.22557	-3.07943	1.15176	9.84092	6.1857	0.330132	6.93423	3.94121	-1.79383	12.0529	-3.24794	-1.70798	3.73669	-0.00839186	-0.169738	-0.762558	-0.196545	1.70043	-2.81449	1.70057	5.9519	0.536574	9.79286	4.80331	4.88276	4.82683	4.96995	5.21538	5.06605	4.94374	5.21058	5.08963	4.86729	5.28741	4.81232	4.86196	5.0278	4.93215	4.92175	4.89523	4.90958	4.96976	4.81287	4.98889	5.11187	4.94677	5.21953
AMMECR1	173.974	178.359	165.714	163.406	153.964	227.211	158.129	151.89	89.5712	182.312	150.231	105.894	134.184	128.534	112.293	131.05	136.552	139.721	124.954	70.7048	71.5668	89.3451	54.3235	85.992	7.40927	7.46012	7.40785	7.41861	7.22521	7.38545	7.68029	7.88004	7.45639	7.4659	7.21323	6.74745	7.02355	6.98658	6.90381	7.01508	7.10996	7.20364	7.01856	6.70791	6.6682	6.72969	6.49716	6.68686
AMMECR1L	105.813	109.542	91.0617	92.797	115.449	156.778	123.717	97.4859	89.4849	149.331	121.472	76.931	125.035	103.584	86.8018	105.088	115.82	86.4497	104.032	88.782	85.7756	99.9545	93.2569	104.659	6.79595	6.85191	6.69853	6.73731	6.87082	6.8928	7.36731	7.30778	7.45529	7.21606	6.94792	6.4034	6.93628	6.73958	6.61267	6.73821	6.89538	6.61691	6.80761	6.98612	6.87836	6.8428	7.16234	6.9007
AMN	2.30165	3.80055	4.37454	3.33411	-0.702094	-0.836453	-2.64691	-1.25801	4.03024	12.8684	1.81658	-2.35903	-0.215464	2.27812	-0.217857	0.41578	1.19466	0.0064812	4.28206	2.76444	3.20135	4.79583	7.04754	7.5251	4.989	5.04045	5.0669	5.03961	4.90308	4.89834	4.83997	4.8894	5.09338	5.30579	4.98127	4.84131	4.90944	4.98361	4.92586	4.93912	4.95674	4.91643	5.05063	5.00148	5.03713	5.07586	5.17137	5.15196
AMN1	2.86688	7.00619	3.15218	1.04318	-0.247748	4.21233	1.51401	-0.0334487	-4.72402	3.15302	0.658631	7.99575	-3.16691	-1.55587	2.89264	2.04979	5.1906	4.3335	2.18965	-4.31641	3.18597	1.08666	1.61526	2.36305	5.00705	5.14032	5.02722	4.96679	4.91872	5.02259	4.98461	4.93635	4.74339	5.01715	4.94782	5.15089	4.81521	4.8602	5.02102	4.98883	5.07549	5.05353	4.98654	4.75927	5.03649	4.95663	4.98196	4.99655
AMOT	6.39679	2.90627	11.1952	13.1835	7.76032	4.67945	3.12046	-1.27463	4.42692	5.36932	7.9185	4.84002	6.09901	7.26052	5.74204	7.35399	4.63963	13.0741	6.77067	10.8778	15.7972	12.3137	10.1124	12.2649	5.12184	5.01359	5.27965	5.35853	5.15565	5.03383	5.03953	4.88889	5.11141	5.0863	5.16604	5.06099	5.10088	5.13163	5.10549	5.13702	5.0611	5.30602	5.12114	5.27894	5.46284	5.30466	5.28741	5.29544
AMOTL2	39.746	25.3111	28.6669	39.6543	29.1639	63.2524	52.0587	37.2909	47.168	55.1551	34.5752	48.9169	59.2943	54.1805	65.9322	65.2386	51.5455	56.1467	44.7364	45.3298	42.9753	58.6246	45.4036	49.0419	5.92141	5.63314	5.74094	5.9932	5.68422	6.02687	6.36048	6.24488	6.67515	6.17782	5.821	6.00281	6.16636	6.10436	6.3424	6.24699	6.08123	6.20064	5.98819	6.24373	6.16291	6.29715	6.32003	6.15056
AMPD1	-3.80405	-6.84607	2.9182	-5.11368	-5.92808	-2.20957	3.6512	-2.08634	-7.36759	-6.44298	-4.12296	-2.76199	-2.24671	-0.725887	-3.66402	-5.30128	-4.12187	-2.83911	-0.293521	3.30622	-6.94204	-3.91322	-2.77844	-2.5708	4.78019	4.70293	5.01958	4.76857	4.73903	4.86522	5.05906	4.85809	4.65581	4.72436	4.79958	4.82854	4.84508	4.88843	4.81815	4.75884	4.78357	4.82436	4.90657	5.01995	4.71358	4.80458	4.83987	4.84497
AMPD2	-2.14666	-1.35517	-2.79549	-3.01332	-1.02451	-6.43477	-2.12906	-3.09397	0.437653	-1.04738	0.325005	-1.88866	-1.30045	2.7138	-5.69221	-0.569615	-5.15442	-2.38451	-4.81694	3.7548	-2.94943	-0.528509	-3.00434	-1.66493	4.83687	4.87885	4.83639	4.83627	4.89296	4.74879	4.85769	4.82125	4.9451	4.8907	4.93845	4.85631	4.87465	4.99713	4.75436	4.90925	4.75233	4.84031	4.76313	5.03591	4.8377	4.90888	4.83307	4.87304
AMPD3	2.53172	1.67371	1.96283	3.00835	2.71691	8.18677	5.27062	3.22436	2.51686	3.90882	-0.388046	4.17107	3.09162	5.15445	1.99322	5.96138	5.37751	4.0287	4.42687	7.0273	2.80775	4.9052	2.10811	3.69456	4.99676	4.9748	4.99067	5.02922	5.00901	5.11141	5.11376	5.06168	5.02718	5.03909	4.91608	5.04176	5.01162	5.07027	4.9922	5.09921	5.08148	5.04422	5.0555	5.14762	5.02358	5.07958	4.9979	5.03724
AMPH	0.00171988	4.42827	-2.74231	3.22329	-7.54096	2.18473	-0.981312	-2.21755	1.04292	-1.82411	-0.0967863	4.10732	2.12591	4.99599	-1.34855	2.21399	0.813606	-2.33602	0.723615	-1.70443	0.210663	0.412109	-0.704328	2.69577	4.91167	5.06095	4.83838	5.03636	4.68975	4.9754	4.89834	4.85286	4.96803	4.8667	4.92549	5.0393	4.98155	5.06518	4.88976	4.99361	4.94467	4.84187	4.93899	4.8508	4.93964	4.93671	4.90657	5.00673
AMT	37.5942	27.5185	14.6523	39.6707	27.8708	35.4943	15.082	8.40081	3.60729	26.0316	47.1554	126.874	122.368	142.149	136.067	121.52	70.1204	63	92.3928	83.3959	133.066	90.8231	157.197	73.0516	5.8812	5.68326	5.38021	5.99371	5.65852	5.63409	5.47159	5.2735	5.07344	5.63409	6.05501	6.95492	6.9049	7.11163	7.16298	6.92104	6.35395	6.30877	6.6766	6.91488	7.47086	6.74456	7.86884	6.51835
AMTN	13.2907	3.88745	5.34841	6.21594	8.51573	-0.738065	3.71207	-0.73176	-1.55563	9.13282	-5.31653	0.608683	-1.82312	-10.2714	-2.87093	-5.90426	1.84856	-3.23	-1.39552	1.34693	-0.959477	-1.18636	0.103033	-1.93186	5.32674	5.04375	5.09784	5.13411	5.17529	4.90124	5.06146	4.90861	4.86573	5.19719	4.76391	4.93462	4.85801	4.58265	4.84263	4.73917	4.97757	4.81117	4.87189	4.95278	4.90227	4.88798	4.93211	4.8639
AMY1A	221.897	216.954	251.393	212.843	201.131	215.629	73.1401	40.8986	62.3537	200.101	207.275	167.006	154.083	149.309	146.666	145.937	157.417	164.81	161.243	129.205	104.99	156.461	78.5299	155.664	7.73244	7.71383	7.9173	7.76812	7.55694	7.31622	6.70791	6.32506	7.00479	7.592	7.6391	7.32702	7.20451	7.18755	7.25318	7.15161	7.31087	7.42054	7.37668	7.48936	7.15981	7.42844	6.9324	7.41001
AMY1B	-1.50339	-0.11668	5.17983	1.74616	3.59885	1.78905	4.92517	-1.61489	1.54082	2.08807	-3.565	-4.72294	5.86245	2.41121	-2.76483	-0.39083	-4.11625	-3.37651	3.63794	3.48506	-1.27733	-0.518723	-0.0918748	0.177605	4.85889	4.91795	5.0921	4.98911	5.03488	4.9651	5.10289	4.87574	4.98718	4.98325	4.81844	4.76345	5.09428	4.98709	4.84577	4.91451	4.78367	4.80628	5.03018	5.02604	4.89212	4.90921	4.92565	4.93097
AMY2A	3.08316	-0.320805	-4.51108	-5.20778	3.22721	-5.21853	-1.60499	-0.291254	1.93729	-4.11976	-1.76737	-3.17531	-3.88192	-1.81849	-3.88318	-6.14796	2.14504	4.65979	0.118009	-0.539144	1.16977	-5.61683	-2.32157	-1.16917	5.01457	4.91211	4.77971	4.76488	5.02381	4.78292	4.87533	4.92569	5.00263	4.79664	4.87475	4.8149	4.79218	4.85151	4.81153	4.73318	4.9865	5.06316	4.91987	4.8902	4.97219	4.75198	4.85329	4.88885
AMY2B	-5.1907	-5.55697	-1.5421	-9.73968	0.918916	3.09024	-2.09859	-1.9208	-0.577738	1.67902	-2.17848	-8.20244	-0.068583	-2.16866	-0.496894	-0.29499	-2.63268	0.0916558	0.135709	1.5003	1.76792	2.90369	2.02131	3.46948	4.73411	4.74316	4.87758	4.62324	4.95399	4.99717	4.85892	4.86464	4.90504	4.97172	4.86192	4.64772	4.91359	4.84022	4.91751	4.91729	4.83427	4.91912	4.9203	4.9586	4.99135	5.01529	4.99491	5.03065
AMZ1	3.69863	-2.37339	-4.2919	-1.64953	-0.462546	0.633945	1.48941	-1.65112	-2.47792	1.84874	-2.05633	-2.1254	-1.57422	1.4685	-3.67692	-2.30988	-2.95525	-1.87175	-3.1192	1.44073	-1.82946	4.08782	-2.48774	-4.16245	5.03488	4.84516	4.78694	4.88075	4.91169	4.93671	4.98373	4.8745	4.83005	4.97673	4.86593	4.84821	4.8658	4.95882	4.81779	4.85329	4.82337	4.85639	4.81496	4.95636	4.87382	5.05349	4.84825	4.79741
AMZ2	295.651	329.864	361.447	325.795	285.756	374.6	174.624	112.091	113.764	299.72	317.138	477.518	471.813	422.264	368.541	346.572	402.458	356.418	375.693	230.356	232.962	294.917	207.242	284.348	8.08379	8.23844	8.37317	8.31388	8.02088	8.04279	7.80395	7.49346	7.74008	8.10983	8.18568	8.76542	8.71439	8.62517	8.49176	8.35374	8.60005	8.46391	8.53594	8.27245	8.20479	8.26789	8.2472	8.1956
ANAPC1	544.502	533.437	513.346	492.827	545.029	587.005	349.164	158.787	78.1428	471.149	522.843	397.726	340.861	424.896	359.303	402.355	359.576	405.275	415.619	364.953	392.761	608.64	333.356	657.204	8.88209	8.86227	8.81393	8.8446	8.86659	8.63392	8.70901	7.93769	7.28737	8.71439	8.83976	8.51231	8.2812	8.63076	8.45896	8.56602	8.44967	8.64106	8.6708	8.91959	8.93026	9.29977	8.92572	9.30682
ANAPC10	119.996	114.361	143.009	113.161	96.5754	142.618	59.3337	44.3633	51.2669	131.348	112.175	91.9659	87.898	101.667	56.5255	104.159	99.9832	95.0844	85.8773	43.4445	36.0501	53.6076	23.7248	63.8119	6.93738	6.89659	7.21451	6.97266	6.67788	6.78713	6.49092	6.40807	6.76364	7.05064	6.86495	6.59292	6.53898	6.716	6.20877	6.72865	6.72084	6.71906	6.59597	6.20193	6.02214	6.2175	5.77028	6.38358
ANAPC11	280.861	266.697	316.146	258.933	267.144	303.911	145.638	113.635	106.906	267.902	282.703	271.39	267.822	282.599	278.905	241.256	241.423	243.21	234.694	134.915	183.482	227.392	149.539	207.894	8.01739	7.96718	8.19252	8.0082	7.9266	7.77906	7.57987	7.51154	7.67089	7.96611	8.03352	7.99312	7.95085	8.06835	8.13024	7.85241	7.88514	7.95611	7.87031	7.54566	7.89847	7.90797	7.80065	7.79702
ANAPC13	1296.41	1180.9	1440.56	1208.38	1116.03	1199.99	549.924	385.12	287.087	1330.93	1143.19	765.287	848.789	835.915	617.397	802.548	864.626	886.466	1066.41	639.928	422.64	602.533	316.578	605.977	10.0774	9.93873	10.2021	10.0717	9.85316	9.64752	9.29394	9.07647	8.87014	10.147	9.92645	9.45874	9.58373	9.59321	9.2323	9.60658	9.71847	9.75027	10.0526	9.73248	9.02795	9.28294	8.8446	9.18948
ANAPC2	20.453	21.7118	10.3497	23.7525	23.7744	20.3757	20.5355	12.5676	8.46975	12.5243	18.9777	18.9326	18.0371	17.3996	25.0902	23.3697	20.4005	18.0474	21.5067	18.6296	27.8416	23.4359	23.9621	17.5552	5.51051	5.55067	5.25474	5.63771	5.56281	5.35853	5.65001	5.45343	5.33326	5.29421	5.47084	5.41688	5.40493	5.39381	5.60658	5.5147	5.46941	5.43531	5.50599	5.54988	5.81911	5.60177	5.77544	5.45313
ANAPC4	296.089	279.244	298.227	297.671	302.738	292.637	99.0741	59.9558	23.0992	298.363	328.791	225.5	237.86	261.461	224.468	266.52	238.733	237.82	252.349	241.446	283.067	336.977	256.517	310.207	8.08574	8.02909	8.12432	8.18636	8.0961	7.7319	7.0701	6.72654	6.02142	8.10019	8.24258	7.74641	7.79812	7.95961	7.82937	8.00177	7.87309	7.92394	7.97747	8.32881	8.46449	8.4552	8.54229	8.31711
ANAPC5	1302.91	1232.97	1162.04	1231.23	1212.02	1529.97	758.052	463.275	332.753	1255.46	1370.08	1228.9	1294.06	1258.19	1219.16	1363.95	1076.22	1275.17	1248.2	1103.39	1138.5	1286.86	1070.96	1161.52	10.0805	9.99784	9.90335	10.1074	9.96584	9.96847	9.77307	9.31437	9.04954	10.0526	10.1752	10.1595	10.1975	10.2241	10.2406	10.4208	10.059	10.3029	10.3138	10.526	10.3674	10.4031	10.5535	10.1014
ANAPC7	46.1729	56.9061	80.3827	54.6749	44.6581	40.8028	14.9438	11.8027	5.74397	46.8368	52.6585	34.0571	37.8945	31.4085	23.1276	29.8224	31.0896	24.9435	31.8122	33.196	36.2564	34.2068	23.0429	49.8254	6.04225	6.22836	6.56996	6.26358	5.98819	5.71237	5.46648	5.41631	5.17684	6.04528	6.13937	5.73989	5.81823	5.6935	5.55647	5.65371	5.71121	5.59334	5.74039	5.96552	6.02687	5.85344	5.74765	6.16168
ANG	23.2504	23.2977	27.0299	22.296	21.0836	25.8188	22.0492	25.5366	20.7027	23.0598	39.6296	145.448	114.641	122.772	83.6287	82.4302	104.439	128.271	136.435	44.4291	59.4887	23.6446	44.9556	52.9934	5.57273	5.5872	5.70791	5.60082	5.50918	5.46256	5.69858	5.91472	5.9328	5.56613	5.92268	7.13395	6.82453	6.93324	6.57156	6.47772	6.7746	7.09163	7.13552	6.22056	6.47027	5.60711	6.31044	6.21463
ANGEL1	87.9948	81.2606	73.3953	69.4728	86.162	120.494	43.272	32.2642	10.9767	98.2025	90.2311	146.391	153.811	141.924	107.507	99.8457	111.984	132.196	117.591	121.585	85.7618	104.343	81.1171	146.404	6.61093	6.55032	6.49011	6.47389	6.56765	6.59638	6.19475	6.12013	5.47299	6.70929	6.63904	7.14171	7.20215	7.10915	6.85939	6.68077	6.86129	7.13395	6.94263	7.40482	6.8775	6.89246	6.97538	7.32394
ANGEL2	280.089	236.102	259.929	239.527	277.64	355.629	225.455	156.171	74.8601	299.22	304.801	414.669	458.731	419.603	427.326	469.153	430.552	369.501	360.521	250.248	266.19	306.715	255.245	292.848	8.0134	7.81582	7.95906	7.9173	7.98028	7.97664	8.12586	7.92058	7.23738	8.10828	8.13453	8.57327	8.67229	8.61448	8.70027	8.79206	8.69147	8.51742	8.46509	8.3839	8.3839	8.32533	8.53436	8.2373
ANGPT1	3.94262	11.627	7.46856	8.60791	7.51673	8.99789	6.05108	5.95383	3.22774	13.2987	10.0643	5.14699	9.00028	1.98379	3.30906	3.17749	1.90539	5.82703	2.77512	9.24064	11.0496	5.55571	13.7671	4.6167	5.04328	5.28025	5.16264	5.21238	5.1468	5.12783	5.14058	5.17016	5.05692	5.31751	5.23134	5.07064	5.17757	4.97407	5.03293	5.02239	4.97941	5.09937	5.00407	5.21893	5.30647	5.09908	5.41183	5.06384
ANGPT2	1.93797	-0.687361	-5.20233	-3.03349	-2.94481	-0.552853	-2.35773	-1.6616	-3.01388	-0.80264	-3.9913	-0.68508	0.785535	-2.0453	-1.41195	-1.38723	-1.01639	-0.642808	-0.388977	-1.15048	-2.26602	-2.0148	-2.25843	-2.36797	4.9773	4.90059	4.75706	4.83584	4.83282	4.90603	4.84972	4.87402	4.80932	4.89805	4.80433	4.89446	4.93974	4.84432	4.88798	4.88285	4.88816	4.89514	4.90352	4.86949	4.86064	4.86255	4.85546	4.85172
ANGPT4	0.84579	-2.76831	-0.95369	-1.19118	-9.86298	-6.89988	-3.41615	-3.19622	-2.60591	-5.74165	5.83966	1.49783	-3.79097	-3.8309	-2.52756	-6.297	-1.41138	-7.98411	-0.372599	-0.422307	-3.70587	-6.5465	-5.99322	-5.61889	4.94047	4.83219	4.89507	4.89599	4.61274	4.7336	4.81419	4.81768	4.82544	4.74535	5.10449	4.96269	4.79463	4.78811	4.85377	4.72811	4.87669	4.65263	4.90395	4.89413	4.81339	4.72137	4.73216	4.75008
ANGPTL1	-2.39595	-2.01626	-0.423996	-4.15008	-1.45925	-0.236996	-2.71883	-2.86258	-2.87823	-3.06907	0.550629	-4.76124	-2.19428	-0.563267	-1.99852	-2.92069	-4.71898	-3.22228	-4.4719	0.468886	0.344578	-0.306565	-2.67066	-0.00111008	4.82835	4.85675	4.9122	4.79902	4.87979	4.91463	4.83763	4.82985	4.81453	4.82875	4.94473	4.76202	4.84677	4.89398	4.86979	4.83384	4.76547	4.81141	4.77311	4.92341	4.94457	4.91577	4.84319	4.92603
ANGPTL2	0.719867	2.31036	0.175659	6.1947	6.72518	0.443538	1.33919	0.0650468	-1.15792	0.900238	-1.70441	-0.848684	0.0512977	0.0540276	-3.51848	-0.669822	0.759468	0.481411	-1.89375	-3.99285	0.552044	-3.38547	3.69309	0.593514	4.93625	4.99451	4.9323	5.13339	5.12352	4.93221	4.97842	4.94038	4.88147	4.94947	4.87669	4.88972	4.91707	4.91304	4.82276	4.90613	4.94308	4.93185	4.85579	4.77109	4.95107	4.82065	5.05488	4.94449
ANGPTL3	-2.1036	0.705181	0.0969198	4.05082	-5.37409	-0.637204	3.99653	-0.665342	-1.65322	-0.247898	-3.60024	0.436239	1.86447	-0.536236	2.71862	0.106595	-1.18288	1.14994	3.00444	2.42456	1.58363	3.34024	1.94495	-0.380138	4.83863	4.94486	4.92992	5.06473	4.75479	4.90398	5.07103	4.9112	4.86108	4.91421	4.81751	4.92882	4.9731	4.89474	5.01496	4.92971	4.8835	4.95447	5.01048	4.9903	4.98505	5.0298	4.99276	4.91367
ANGPTL4	298.077	253.58	229.314	211.899	277.66	371.443	240.05	184.682	183.082	132.891	205.958	558.952	536.439	551.126	493.061	415.757	460.783	300.965	260.346	318.536	141.849	212.237	107.246	168.344	8.09559	7.90589	7.80395	7.75968	7.98076	8.03218	8.20479	8.11825	8.30742	7.06573	7.63093	9.00482	8.90972	8.9971	8.9059	8.61641	8.78315	8.24554	8.02447	8.73635	7.55642	7.81841	7.36947	7.51607
ANGPTL5	-8.36947	-3.16192	-2.66142	0.317148	-2.68507	1.45719	8.85664	-0.0952849	-4.5221	-2.0257	-3.52022	4.72991	-5.39787	2.41904	-1.83991	1.20206	-8.23222	-1.259	-5.83227	5.46135	-4.31641	-4.76832	-4.10051	-1.85965	4.62616	4.81958	4.84065	4.94426	4.83987	4.9574	5.24257	4.93403	4.75047	4.86068	4.81968	5.05826	4.74039	4.98767	4.87385	4.964	4.65078	4.8763	4.72563	5.09265	4.79258	4.77822	4.7943	4.86614
ANGPTL6	-2.88932	4.56138	1.25187	-0.498702	-2.60125	7.7199	-1.01527	2.54464	1.30502	3.95148	2.53812	2.03114	-6.6494	0.416866	-4.18711	0.310212	2.40436	-1.78196	4.76492	1.75053	-2.39393	1.42365	-0.361955	-0.187424	4.81323	5.06491	4.9674	4.91732	4.84252	5.10065	4.89657	5.03617	4.9779	5.04036	5.0054	4.97883	4.70218	4.92595	4.8013	4.93607	4.99429	4.85963	5.06562	4.9673	4.85613	4.96818	4.91658	4.91987
ANGPTL7	1.11652	5.30547	-0.153404	1.52469	-0.7918	1.92848	3.09768	3.9107	-1.26057	10.2477	-2.55411	-3.11838	1.1963	9.07134	2.94127	9.2244	-1.21835	2.62892	3.40992	5.39027	1.503	8.14353	3.92665	3.05434	4.95077	5.08808	4.92169	4.98269	4.90005	4.96909	5.03877	5.08785	4.87693	5.23122	4.85075	4.81671	4.95268	5.17905	5.02289	5.18582	4.88234	4.99863	5.02342	5.09081	4.98242	5.18094	5.06249	5.01828
ANK1	22.4189	22.1386	21.5778	24.4481	28.542	25.1873	8.89201	8.42526	4.87148	24.445	19.0292	17.8248	17.3856	13.1943	24.5216	22.9959	12.6472	14.8701	14.2772	16.5637	23.3298	18.7013	16.345	28.3671	5.55501	5.55875	5.57653	5.65885	5.67251	5.4515	5.24436	5.27507	5.13093	5.60082	5.47272	5.38594	5.39153	5.28412	5.59227	5.50624	5.2773	5.35454	5.32269	5.47555	5.69369	5.48939	5.51033	5.73288
ANK2	-0.511513	-3.10752	1.0913	-2.42332	2.6935	-4.70699	-1.79145	-3.84732	1.23208	0.956356	-1.80036	0.4848	9.17541	-0.238869	-1.8681	0.0766116	-3.25755	0.285038	2.60616	-1.10905	-1.56206	-0.271565	0.279875	-1.92789	4.89407	4.82133	4.96127	4.85679	5.00808	4.79707	4.86857	4.79349	4.97546	4.95141	4.87364	4.93088	5.18222	4.90406	4.87318	4.92882	4.81323	4.92532	4.9993	4.87113	4.88288	4.91692	4.93807	4.86398
ANK3	11.9229	10.2079	12.9414	8.34011	8.43932	19.4554	9.37313	11.2257	4.41982	14.5088	14.22	12.9156	12.6997	11.7037	10.9159	9.29091	16.0815	11.1956	8.94889	7.90975	12.4624	9.27624	12.0561	15.8596	5.28429	5.23847	5.3317	5.20201	5.17329	5.34037	5.26351	5.39281	5.11099	5.34968	5.34439	5.27135	5.27894	5.2469	5.251	5.18707	5.36556	5.25338	5.18222	5.17675	5.35136	5.21285	5.35411	5.40344
ANKAR	2.99281	6.00676	3.75395	2.24398	-2.03496	23.5067	12.9271	-0.241365	6.62417	1.70832	-2.09015	12.4536	12.725	12.5928	8.57376	7.34833	3.51928	5.14079	9.16652	7.56567	2.55394	6.72328	2.91369	3.20719	5.01158	5.11037	5.04664	5.0054	4.86002	5.4207	5.39263	4.92807	5.22659	4.97234	4.86476	5.25892	5.27965	5.26832	5.18589	5.13696	5.02714	5.07807	5.18761	5.16507	5.0158	5.13682	5.02798	5.02276
ANKDD1A	4.83966	2.41536	2.90578	6.84368	2.6161	2.97036	1.14369	7.64564	14.9563	5.73553	2.44608	7.6658	10.0369	7.43295	4.29607	5.95524	9.08237	11.7648	7.37715	11.208	7.71389	2.69609	7.78185	5.29446	5.07517	4.99837	5.01913	5.15636	5.00526	4.99422	4.97172	5.24052	5.67084	5.09651	5.0021	5.1427	5.20449	5.13606	5.06168	5.09904	5.18734	5.2701	5.13696	5.28952	5.19404	5.0093	5.19773	5.08618
ANKFN1	-3.04754	-6.81074	-7.0772	-0.366057	-2.82286	-6.75761	-6.17764	-4.41622	-1.59722	-1.4753	-0.787353	-3.10348	-1.50614	-3.46875	-0.661834	-0.771102	-6.44447	-2.27984	-3.7555	-7.6215	-4.26979	-7.71383	-5.5961	-0.902298	4.80676	4.7038	4.69032	4.92193	4.83646	4.73852	4.71766	4.77228	4.86329	4.87753	4.9047	4.81718	4.86782	4.79719	4.91195	4.90248	4.70829	4.84393	4.79682	4.64585	4.79449	4.68457	4.7423	4.89725
ANKFY1	216.29	237.153	210.878	194.575	223.688	206.133	111.121	72.4329	18.3065	201.994	225.283	210.054	208.104	236.041	237.433	231.879	200.838	185.272	208.807	187.871	237.348	268.233	237.589	233.696	7.70002	7.82279	7.70412	7.65703	7.70363	7.24796	7.22189	6.9266	5.83256	7.60219	7.74953	7.63997	7.62012	7.82387	7.91265	7.79909	7.64159	7.58086	7.70704	8.00021	8.23498	8.13453	8.42919	7.94755
ANKH	-1.66648	-1.72292	-1.45023	-0.0348268	-5.01694	-2.29981	1.00658	-2.01473	6.17581	-3.10883	-0.0553434	-5.92864	-5.37213	-1.74497	-3.6218	4.5141	-1.93691	-7.12949	-6.3723	0.766551	-7.2911	-4.72253	0.475516	-3.24094	4.85344	4.86654	4.87979	4.93353	4.76703	4.86205	4.96662	4.8608	5.19977	4.82705	4.92668	4.72547	4.74126	4.85369	4.81979	5.0602	4.85935	4.67888	4.70965	4.93296	4.70256	4.77943	4.94477	4.82534
ANKHD1	50.583	49.1801	34.8804	44.7564	46.5141	74.7319	46.9504	44.0162	49.6556	49.371	48.1951	49.5524	46.5476	53.9316	38.1508	55.5285	54.106	45.8312	64.5332	38.8685	38.6013	61.9738	37.6286	46.0923	6.12281	6.10663	5.88277	6.09345	6.02307	6.15124	6.26591	6.39753	6.72683	6.08303	6.06796	6.01479	5.9733	6.10123	5.88101	6.10401	6.1236	6.02376	6.30305	6.1082	6.0731	6.34543	6.13725	6.09496
ANKHD1-EIF4EBP3	13.2149	15.5871	8.21586	15.322	16.9622	29.6865	32.9235	53.3428	34.1983	19.8816	17.8383	42.0295	18.4094	33.5847	33.8864	32.5558	22.4425	25.5782	24.6629	16.3859	18.6469	25.5979	22.7565	18.0935	5.32424	5.38886	5.18597	5.42089	5.40766	5.52961	5.98306	6.6002	6.36484	5.48493	5.43804	5.87972	5.41293	5.74492	5.80356	5.71512	5.51601	5.60961	5.58404	5.46941	5.55087	5.65574	5.73707	5.46648
ANKIB1	500.595	364.964	351.972	397.914	396.973	435.165	291.077	250.329	177.645	388.532	428.734	449.898	485.937	551.745	360.913	554.894	506.824	512.063	543.338	359.64	315.051	460.774	356.683	385.123	8.76477	8.37061	8.33805	8.57124	8.45281	8.24133	8.45232	8.54229	8.26741	8.45676	8.57647	8.68949	8.75299	8.99889	8.46449	9.0356	8.9208	8.96069	9.05031	8.89858	8.61362	8.87928	9.01025	8.59569
ANKK1	-0.161473	2.31158	2.79443	2.18968	8.77933	20.4352	6.67892	5.7492	-0.762819	0.147957	1.77324	6.88989	2.62037	0.228649	3.23399	5.37842	1.08384	4.41151	7.5266	3.91545	6.62371	4.66794	1.79428	2.19773	4.90593	4.99458	5.01635	5.00364	5.18339	5.35914	5.16647	5.16135	4.89753	4.92562	4.9801	5.1202	4.99722	4.91971	5.0307	5.08403	4.95301	5.0556	5.14132	5.04132	5.1525	5.07188	4.98807	4.99167
ANKLE1	0.262088	6.14139	0.347473	1.55824	-2.43547	1.8997	-2.76346	7.21007	-0.723536	3.33409	4.89002	3.32702	1.65465	3.69078	-2.42231	-0.22354	1.45765	8.09442	2.81998	3.86445	1.09333	5.70965	3.45227	2.53569	4.91982	5.11431	4.93688	4.98369	4.84779	4.96843	4.83632	5.2236	4.89888	5.02256	5.07612	5.01638	4.96624	5.0267	4.85689	4.91946	4.9652	5.16203	5.0053	5.03961	4.96956	5.10369	5.04664	5.00171
ANKLE2	595.366	628.978	520.965	477.453	665.024	1795.43	1601.97	1163.44	508.639	768.904	583.751	765.735	701.124	634.836	614.557	660.039	790.805	712.261	655.943	658.513	481.642	818.675	474.152	744.972	8.98976	9.09027	8.83138	8.81149	9.12677	10.2051	10.7151	10.4921	9.53412	9.36189	8.99134	9.45936	9.30181	9.19206	9.2244	9.30124	9.57811	9.44926	9.33279	9.78078	9.20801	9.70776	9.40021	9.49582
ANKMY1	17.8139	17.4604	16.3541	14.3309	19.9917	29.0904	11.5455	6.58342	2.09467	13.8315	14.3766	27.8043	29.3203	29.3644	32.0283	35.8716	26.52	19.9878	19.7673	25.2764	25.4843	20.5246	27.0662	24.6274	5.44661	5.43943	5.42359	5.39132	5.4824	5.51749	5.34016	5.1938	5.00967	5.33079	5.3492	5.60908	5.64859	5.65021	5.75956	5.78284	5.61095	5.47716	5.46712	5.76016	5.75223	5.53395	5.86658	5.63951
ANKMY2	220.653	208.385	205.968	212.456	195.229	481.664	319.534	206.153	226.241	227.864	234.259	276.623	321.617	303.333	219.427	319.895	269.452	246.798	216.367	169.157	197.663	221.447	191.522	233.903	7.72485	7.66693	7.6775	7.76502	7.52478	8.37652	8.58446	8.25891	8.56346	7.76645	7.8099	8.01782	8.2023	8.17035	7.79947	8.2462	8.04466	7.98218	7.75224	7.866	7.9986	7.8708	8.13453	7.94963
ANKRA2	35.5937	28.0836	26.3416	33.2972	25.2391	91.0712	68.2081	78.6131	48.0455	40.6171	38.8376	90.3796	94.5463	81.9268	59.7938	89.5136	83.8129	75.1704	97.2042	49.9755	69.1173	44.6148	59.1488	46.6517	5.84554	5.69793	5.69147	5.85807	5.59732	6.33409	6.63283	7.02264	6.69429	5.93504	5.90506	6.57309	6.6173	6.48341	6.256	6.56009	6.53898	6.47389	6.72326	6.3384	6.62877	6.0524	6.58367	6.10578
ANKRD1	195.912	161.946	209.701	241.899	226.804	711.69	484.366	572.804	1028.03	243.689	339.093	137.181	145.84	130.308	146.554	159.704	230.723	197.954	187.26	217.837	137.366	243.739	119	214.032	7.5608	7.34756	7.69811	7.92714	7.72337	8.88963	9.12845	9.60011	10.3138	7.84233	8.27245	7.05577	7.1244	7.00404	7.25271	7.28047	7.82279	7.65842	7.57127	8.19747	7.50941	8.01051	7.50387	7.83416
ANKRD10	78.1865	85.3785	52.3781	64.9609	86.3068	190.942	130.082	129.896	92.4351	105.342	98.508	105.832	125.755	108.046	83.379	143.842	100.64	108.053	102.055	117.104	137.713	155.029	147.195	112.36	6.49513	6.59571	6.20738	6.41955	6.56968	7.14426	7.44033	7.68436	7.49731	6.78752	6.72502	6.74606	6.94308	6.79414	6.56817	7.13336	6.7309	6.86624	6.78242	7.34673	7.51421	7.41128	7.7805	6.98746
ANKRD11	455.161	466.995	391.472	441.327	536.936	709.408	576.541	566.571	426.347	414.283	459.815	656.521	655.79	680.282	560.415	691.378	647.893	555.492	645.468	427.636	444.989	611.092	466.934	475.931	8.64165	8.69745	8.46509	8.69489	8.84779	8.88345	9.35936	9.58103	9.32755	8.55098	8.67569	9.22293	9.19611	9.295	9.09645	9.37917	9.28818	9.07519	9.3034	9.15165	9.0915	9.30771	9.38166	8.88666
ANKRD12	71.8903	72.7408	61.8783	57.4009	89.3688	128.681	115.361	99.8379	31.2198	99.6432	85.4227	89.269	127.375	137.728	91.1321	130.034	116.822	87.6846	110.577	65.6865	79.8503	87.7526	59.384	71.7727	6.41955	6.45083	6.34745	6.3058	6.6026	6.66885	7.26709	7.34039	6.27196	6.7243	6.57597	6.55785	6.96176	7.07126	6.67147	7.00345	6.90752	6.63473	6.88228	6.62193	6.79414	6.70637	6.5883	6.50139
ANKRD13A	367.925	343.084	319.982	309.761	335.869	1004.36	631.843	520.79	395.419	362.905	384.325	285.635	322.073	329.024	297.552	277.872	275.594	293.839	242.93	154.417	184.809	238.911	167.45	215.385	8.37002	8.29065	8.20874	8.23844	8.23037	9.35936	9.49282	9.45766	9.2416	8.36753	8.44463	8.05896	8.20565	8.27678	8.22064	8.05372	8.07463	8.21059	7.92337	7.74545	7.90649	7.97747	7.95653	7.83983
ANKRD13B	15.2794	13.3444	12.6416	17.1284	22.5194	23.4878	17.0425	2.44569	1.26787	13.6318	15.692	10.6078	6.66615	10.4003	19.0968	11.9252	11.4339	13.7887	13.4335	4.29931	9.56354	17.6023	13.0547	14.0002	5.38021	5.32796	5.32269	5.4724	5.53965	5.42023	5.5373	5.0322	4.97677	5.32689	5.38369	5.21919	5.11471	5.21538	5.45878	5.25226	5.24329	5.32442	5.29962	5.05367	5.25502	5.4566	5.38759	5.34935
ANKRD13C	63.5769	42.7295	61.217	69.7741	59.1129	75.383	47.3426	52.5975	72.8592	72.3057	60.5042	55.6713	66.4323	52.5606	41.8942	69.0194	67.8202	59.0533	76.2481	41.7596	33.2068	67.9849	33.438	49.8962	6.30905	5.99371	6.34011	6.47692	6.21945	6.15957	6.27406	6.58625	7.19962	6.41376	6.2585	6.11517	6.267	6.0745	5.95606	6.30305	6.32054	6.24864	6.46751	6.16996	5.95642	6.42907	6.04528	6.16354
ANKRD13D	5.65097	1.99118	4.25266	-7.0621	0.154458	5.53522	3.46564	-1.62932	-0.209711	-1.15898	2.83228	3.59248	1.96291	3.78754	3.16933	0.536744	2.73229	8.20363	4.59428	-0.955213	4.97755	2.521	5.21342	-0.63089	5.09916	4.98538	5.06321	4.70691	4.93091	5.05139	5.05124	4.87513	4.91834	4.88729	5.01414	5.0239	4.97612	5.02988	5.02848	4.94226	5.00545	5.16604	5.06067	4.87621	5.09484	5.00444	5.10834	4.90598
ANKRD16	72.218	63.7928	76.1698	63.4342	76.2929	60.4875	22.6749	12.9231	7.55512	59.1944	50.4704	44.1837	52.7908	44.8475	40.2903	46.5162	43.0235	41.6947	38.6467	41.4798	46.3731	58.8319	34.3729	59.1722	6.42278	6.33698	6.52121	6.39627	6.44682	5.99279	5.71351	5.46913	5.28012	6.23832	6.10509	5.9217	6.06879	5.95381	5.9217	5.96388	5.93504	5.94485	5.87573	6.16523	6.22902	6.29847	6.06652	6.31173
ANKRD17	85.6148	69.7005	74.9693	75.8913	75.3366	96.1356	51.8493	48.4318	42.0029	71.5211	75.3651	53.4444	53.1892	56.7914	42.4693	57.7345	56.7788	53.9111	52.7505	40.9442	37.6495	61.943	34.1488	55.8772	6.57843	6.40646	6.50784	6.55003	6.43531	6.38853	6.35689	6.50305	6.56481	6.40515	6.45523	6.07338	6.077	6.14882	5.96594	6.13725	6.15957	6.166	6.12013	6.15337	6.0535	6.3446	6.05972	6.26205
ANKRD19	3.41423	1.3245	-3.0212	0.119447	-6.0769	9.88867	-6.43693	3.31529	0.613386	4.88075	1.90442	-0.948057	2.48595	1.9216	4.08857	7.00707	3.28071	0.393253	6.53418	-1.90807	-0.720257	1.21191	-2.97419	3.7923	5.0252	4.9645	4.82902	4.93842	4.73468	5.1472	4.70768	5.06562	4.95166	5.06925	4.984	4.88665	4.99233	4.97252	5.05603	5.12841	5.02028	4.92896	5.11674	4.84421	4.90985	4.96107	4.83396	5.04091
ANKRD2	10.983	9.57258	7.91339	9.07886	2.90005	12.8499	5.61709	4.45051	5.74501	9.14211	13.1698	4.6639	4.78167	13.6646	13.0587	12.8783	14.7367	16.7098	10.2659	16.2464	32.6607	30.4552	38.3977	23.0973	5.25873	5.21885	5.17563	5.22491	5.01446	5.20591	5.12707	5.10864	5.17702	5.19765	5.31739	5.05586	5.06184	5.2985	5.30816	5.27569	5.3341	5.39907	5.21885	5.46597	5.94518	5.76837	6.15728	5.5999
ANKRD20A1	2.55975	13.4859	7.72817	8.67099	10.1372	19.3803	14.8663	11.8881	13.5293	7.81999	3.85022	0.195902	0.584821	5.84162	6.10058	4.79481	4.5823	3.82951	12.9896	7.15573	7.22866	4.89947	13.3135	7.11997	4.9977	5.3331	5.17056	5.21366	5.224	5.33907	5.46329	5.42023	5.60329	5.15837	5.04575	4.92091	4.93332	5.09032	5.11718	5.06867	5.05935	5.03751	5.28937	5.15175	5.17623	5.07938	5.39725	5.14082
ANKRD20A2	0.00783865	-6.29387	-3.62066	-6.97539	-2.82293	-0.491376	-0.0768431	-5.46018	-7.51727	-2.10789	-6.31168	-5.50639	-0.312136	-5.41015	0.149903	-1.73476	-3.18953	-1.27792	-2.93263	-0.246389	-1.22467	-2.98388	-1.48644	-4.22916	4.91191	4.72032	4.80827	4.71133	4.83644	4.90783	4.93046	4.73468	4.64874	4.8583	4.73013	4.73935	4.90648	4.73668	4.93678	4.87154	4.81546	4.87568	4.82161	4.89974	4.89367	4.83313	4.88144	4.79458
ANKRD20A3	2.89769	-0.651321	-5.2032	2.56938	-1.58003	-2.47432	1.50801	-0.939321	-0.710703	3.13394	-0.289951	-1.03549	-2.15644	-1.39527	-1.70602	-2.04043	-2.15712	-4.33276	0.970994	1.36978	-2.51976	0.0240512	1.8938	-0.427994	5.00815	4.90164	4.7569	5.01614	4.87579	4.85716	4.98439	4.90055	4.89938	5.01674	4.919	4.88359	4.84789	4.86535	4.87758	4.86224	4.85146	4.77558	4.94664	4.95396	4.85264	4.92515	4.99119	4.91188
ANKRD20A4	-2.26952	-1.78504	-3.93021	-3.18297	-2.43197	-1.20235	-0.624718	-1.47791	-1.3248	-1.88103	-2.12345	-5.83598	0.399793	2.77091	-1.46261	-6.47907	-2.64136	-3.53187	-1.2887	5.44475	-0.163662	-3.94328	-0.413233	-4.16499	4.83251	4.86514	4.79886	4.83123	4.84807	4.88957	4.91093	4.88051	4.87475	4.86472	4.8637	4.72811	4.92718	4.99925	4.88633	4.72257	4.83396	4.80136	4.87516	5.09231	4.9281	4.80389	4.91478	4.79707
ANKRD20B	1.1649	1.37797	0.466219	5.77499	-0.963456	-0.687417	-1.29909	-2.64197	-2.3806	1.79397	0.492256	-1.50865	-1.93	2.20693	-2.79705	-1.68977	-2.93134	1.67579	-0.705399	-0.866773	-1.59083	0.913084	-0.886171	-0.494114	4.95262	4.96561	4.93993	5.12015	4.8952	4.90259	4.88647	4.8377	4.83441	4.9748	4.94329	4.86817	4.85482	4.98094	4.84472	4.87357	4.82436	4.96992	4.89339	4.87918	4.88173	4.95233	4.8997	4.90992
ANKRD21	2.81455	4.79502	-4.55376	2.18538	0.613031	1.36015	-0.499992	-0.908083	-1.7825	0.259758	4.14008	-3.0853	0.47952	-2.40953	-1.29832	-2.54243	5.39275	-1.30421	-0.308642	0.220698	3.51096	-0.115464	-4.7534	-3.82945	5.00549	5.07188	4.77836	5.00343	4.9444	4.9544	4.91557	4.90164	4.85613	4.92922	5.05415	4.81785	4.92983	4.83297	4.89109	4.84644	5.08166	4.87491	4.90603	4.91487	5.04699	4.92101	4.77076	4.807
ANKRD22	199.213	227.54	226.151	182.38	224.197	207.642	101.651	72.9223	47.3269	163.399	202.893	84.638	73.2291	72.8818	55.1163	61.8437	62.158	52.7507	71.6906	104.199	192.377	160.529	145.284	393.217	7.5815	7.76989	7.78473	7.56655	7.70704	7.259	7.0986	6.93409	6.67912	7.32702	7.61421	6.5004	6.35497	6.37299	6.17992	6.2011	6.23832	6.14209	6.40218	7.19475	7.965	7.46268	7.76189	8.62628
ANKRD23	7.74235	13.7104	6.18422	5.72357	11.8129	22.3484	11.2334	15.2543	-0.314776	13.5962	6.6553	21.7615	18.4478	18.3659	13.4467	19.6546	12.186	7.83773	15.3055	23.1195	22.051	24.9029	17.1462	20.2808	5.1649	5.34072	5.12409	5.11799	5.26906	5.39683	5.32796	5.57315	4.91455	5.32611	5.12975	5.48252	5.41449	5.41372	5.31764	5.43128	5.26463	5.15565	5.35012	5.68743	5.65262	5.63771	5.54132	5.52548
ANKRD24	-3.48338	0.963238	-0.102364	-5.15993	-0.655875	0.507709	0.735413	-1.32479	-1.66844	-9.04259	-2.75827	-3.77242	-4.39328	-8.21131	-2.76453	-2.45716	-0.0532836	-4.5082	-7.95474	1.98385	-3.12993	-7.36622	-2.12319	0.197601	4.79151	4.95332	4.92338	4.76738	4.90458	4.93381	4.95787	4.88698	4.86009	4.63692	4.84407	4.79385	4.77701	4.64772	4.84586	4.84884	4.91723	4.77102	4.66544	4.97546	4.83225	4.697	4.85968	4.93157
ANKRD26	43.1155	33.8015	46.9454	38.2107	28.4652	35.7151	36.7213	23.6142	9.82625	39.7922	48.2489	69.3071	77.9822	77.8301	47.512	71.2756	65.7172	68.7181	68.3712	58.6198	64.423	72.7221	72.2167	84.7635	5.98888	5.81541	6.11429	5.96674	5.67057	5.63882	6.06652	5.85953	5.41183	5.92106	6.06938	6.30424	6.42278	6.43272	6.06062	6.33541	6.28695	6.3842	6.36048	6.49972	6.55083	6.50305	6.81781	6.66924
ANKRD27	65.2315	51.7734	62.7423	30.2899	60.0624	75.1676	21.1094	23.5232	10.2808	56.7762	52.7199	70.2314	70.4099	64.4288	59.7956	61.5175	59.3354	53.1492	56.2272	57.1778	43.1853	47.5734	25.1164	55.2676	6.33776	6.14903	6.35762	5.79231	6.23092	6.15648	5.67172	5.85663	5.43531	6.19911	6.14109	6.3186	6.31824	6.25879	6.25624	6.19538	6.19763	6.15124	6.1767	6.47692	6.16636	6.11464	5.80722	6.25223
ANKRD28	23.2971	16.8915	24.0826	35.7168	23.9047	38.04	18.4497	18.8291	16.0261	29.804	33.0934	34.1321	38.1399	28.3929	25.4214	34.7523	31.9562	33.778	38.254	21.8555	18.5161	26.8032	17.5091	27.4606	5.57473	5.42525	5.63977	5.90721	5.56682	5.67172	5.58602	5.70293	5.72453	5.71351	5.79261	5.74094	5.82296	5.63388	5.61419	5.76065	5.72863	5.79168	5.86749	5.64859	5.54599	5.68492	5.55416	5.71051
ANKRD29	14.537	16.2337	11.6071	12.6081	13.0555	11.7466	3.17019	5.4554	0.741301	15.5443	1.83314	19.6036	17.6499	19.3706	15.589	25.8615	26.6215	19.0109	17.9603	6.66249	6.36014	5.91967	6.03296	1.85232	5.36075	5.40687	5.29325	5.33888	5.30168	5.18414	5.04132	5.15044	4.95633	5.37601	4.98184	5.42894	5.39635	5.4376	5.37173	5.56682	5.61246	5.45853	5.42296	5.13534	5.14349	5.11051	5.13528	4.98175
ANKRD30A	-5.99657	-4.98794	-5.33958	-3.27902	-5.49404	-4.37224	-5.20953	-4.97023	-2.81463	-4.07893	-1.97717	-5.56671	-6.22489	-2.91974	-5.48761	-5.69066	-7.31729	-4.24466	-6.51176	-2.31368	-5.43302	-7.50046	-4.14292	-4.95251	4.70462	4.76017	4.75319	4.8282	4.75154	4.80693	4.74931	4.75143	4.81744	4.79846	4.86908	4.73758	4.71394	4.81458	4.75968	4.74655	4.68147	4.77836	4.70625	4.8301	4.76084	4.69189	4.79268	4.77132
ANKRD32	61.9872	59.5384	56.3917	61.4709	79.515	126.112	39.916	28.4941	3.9458	79.1903	73.9077	74.3711	78.2442	73.6617	71.8707	101.052	72.458	57.7825	62.3772	52.1511	49.3536	72.3871	46.7583	75.1794	6.28545	6.27281	6.27493	6.37087	6.48341	6.6441	6.13209	6.01419	5.08995	6.50263	6.43816	6.36977	6.42621	6.38197	6.42397	6.69604	6.38712	6.22651	6.26929	6.3868	6.29009	6.5004	6.34873	6.54677
ANKRD33	562.242	551.558	554.622	468.963	602.144	535.739	315.534	187.748	170.628	482.318	520.303	480.034	520.783	375.625	357.516	273.38	416.118	360.078	362.55	255.201	550.435	259.191	445.779	613.671	8.92411	8.90888	8.90805	8.79051	9.00291	8.51366	8.57124	8.14494	8.21877	8.74003	8.83079	8.77106	8.8687	8.45108	8.45108	8.0278	8.64452	8.47863	8.47489	8.41587	9.3968	8.0907	9.31279	9.2138
ANKRD34A	19.1424	19.2351	16.9116	17.0139	20.3516	21.2144	9.94153	6.62126	10.2781	7.60294	16.2157	23.7526	11.9403	27.1991	11.2219	15.8584	20.044	11.2706	16.0873	12.8037	19.1854	24.6553	9.1671	45.4642	5.47702	5.48405	5.44269	5.46893	5.49239	5.37383	5.28179	5.19517	5.43484	5.15196	5.40011	5.52606	5.25675	5.60887	5.26094	5.34606	5.46168	5.25591	5.37142	5.35411	5.56459	5.63121	5.25315	6.08275
ANKRD34B	-2.3299	-8.04999	-4.53934	-9.03256	-6.60083	-5.34246	-4.4389	-2.06632	8.72642	-6.50545	-3.20119	-3.57687	3.4537	-9.70707	-4.54694	-6.01533	-7.02622	-1.48053	-9.08873	-6.54667	-5.48178	-5.43123	-6.75804	-2.74666	4.83014	4.66082	4.77866	4.64312	4.72089	4.77971	4.77672	4.85901	5.34636	4.72186	4.83074	4.80136	5.02215	4.5989	4.78904	4.73656	4.69032	4.86908	4.62129	4.68273	4.75938	4.75785	4.7036	4.84007
ANKRD35	16.1815	13.4276	8.90252	12.7584	19.058	21.0163	9.9353	6.95907	8.1001	25.1612	11.1889	16.6792	4.93214	7.33669	14.5855	11.1766	9.70435	5.58962	8.74991	10.423	19.7273	17.85	16.9333	15.4861	5.40409	5.33052	5.20836	5.34346	5.4566	5.37071	5.28146	5.21135	5.31142	5.6166	5.26222	5.36309	5.06623	5.13347	5.34482	5.23353	5.20263	5.09075	5.17658	5.26265	5.57879	5.46479	5.53141	5.39241
ANKRD36	11.8421	14.4123	13.5556	12.7712	16.1298	21.3116	8.96283	9.86255	8.02852	18.3904	15.7428	20.2933	20.5105	18.6208	16.3612	30.1977	19.7485	23.1468	25.681	18.9061	15.2811	20.5326	19.8695	10.3737	5.28172	5.35974	5.35001	5.34406	5.38636	5.37618	5.24763	5.33424	5.30675	5.44638	5.38566	5.44763	5.46003	5.42234	5.39173	5.66188	5.45637	5.55416	5.60796	5.55624	5.44737	5.53436	5.64203	5.23791
ANKRD36B	28.5088	31.2404	30.5138	30.5591	39.3574	33.406	21.0395	20.1666	13.0063	36.9101	43.7441	34.7353	50.8616	40.3693	37.9448	51.8081	40.1762	44.521	40.5349	49.1841	42.1299	46.1134	55.7473	31.0417	5.69922	5.7593	5.77544	5.7991	5.90506	5.59356	5.66897	5.74826	5.57988	5.86147	5.99488	5.74849	6.04225	5.87363	5.87719	6.04365	5.88665	6.00135	5.91294	6.32544	6.14614	6.08438	6.51944	5.78955
ANKRD37	50.8887	42.4142	49.1497	66.9545	93.2382	240.946	202.207	185.619	331.129	35.4201	37.4467	54.7523	69.3926	53.8817	50.9918	91.4023	35.1452	28.3747	30.5748	12.4647	27.3963	30.7007	15.9134	25.516	6.12962	5.98819	6.15148	6.44285	6.64689	7.46781	7.98497	8.12796	9.04288	5.83134	5.87545	6.09613	6.30545	6.09976	6.11679	6.58241	5.79082	5.68208	5.71562	5.34088	5.80445	5.77296	5.49325	5.66431
ANKRD38	467.837	490.534	428.069	463.697	481.834	340.341	211.669	76.7963	50.3577	455.799	236.883	91.8728	95.6084	91.3808	83.6214	124.677	222.074	261.634	247.606	214.333	532.938	243.025	456.765	325.614	8.6793	8.75372	8.57647	8.77253	8.69427	7.92058	8.04466	6.99592	6.744	8.6686	7.82572	6.59035	6.62847	6.59945	6.57089	6.94895	7.76758	8.06243	7.94869	8.17402	9.34409	8.00454	9.34753	8.37851
ANKRD39	138.51	139.606	150.614	130.944	107.622	133.685	83.2863	69.4099	72.3203	132.061	121.98	118.554	127.002	115.57	103.571	108.927	109.102	98.7655	98.6508	80.4936	67.7031	104.32	60.3296	105.496	7.11618	7.13993	7.2858	7.14985	6.79462	6.71135	6.85374	6.87877	7.19395	7.05775	6.95492	6.87222	6.95914	6.869	6.81295	6.78317	6.82913	6.75654	6.74366	6.87358	6.60655	6.89128	6.60698	6.91303
ANKRD40	85.7267	112.518	110.45	109.286	104.47	205.242	80.8098	68.2229	143.9	82.3643	90.1216	104.983	102.878	94.6301	101.965	108.032	95.6145	87.2956	103.205	49.7456	48.3249	73.1046	53.1202	60.1021	6.57957	6.87877	6.89659	6.92983	6.76066	7.24027	6.81781	6.85979	8.01782	6.53898	6.63725	6.73692	6.70791	6.64165	6.80015	6.7746	6.67629	6.62914	6.79595	6.33327	6.26929	6.50653	6.47421	6.32658
ANKRD41	-0.0117117	-1.52793	-1.35846	-1.61685	-1.69359	-1.91614	-1.03772	0.788752	3.97735	-2.68758	0.0749247	1.61329	1.45527	-0.885708	-0.169719	2.25892	-3.30644	0.487347	0.214578	-0.763139	-0.778401	1.54465	-3.03438	1.6396	4.91128	4.87284	4.88268	4.88201	4.87223	4.87211	4.89604	4.96894	5.09119	4.84007	4.93114	4.96616	4.96073	4.88276	4.92737	4.99503	4.81121	4.93221	4.92263	4.88271	4.90843	4.97234	4.83205	4.97522
ANKRD42	-2.70486	-3.38213	-0.201172	-8.08056	-5.42418	-4.42047	-2.32991	-2.19904	1.45886	-3.77062	-2.63717	-4.44431	-8.94715	-3.86521	-3.59177	-2.73278	-4.05094	-3.90332	0.27503	-4.80065	-2.72294	-5.96016	-0.977251	-5.62961	4.8192	4.81264	4.91994	4.67252	4.75355	4.80535	4.85075	4.85389	4.98384	4.80656	4.84804	4.77202	4.62324	4.78721	4.82056	4.84039	4.78589	4.78897	4.92441	4.74096	4.84558	4.74083	4.89698	4.74991
ANKRD43	4.50015	9.38716	1.37884	2.7373	-0.465201	1.16841	-0.884056	-3.31757	1.52368	4.251	4.46973	-0.0248471	7.64506	2.7357	-3.99103	2.77175	2.22222	-1.0476	-0.881892	1.43045	-0.467449	3.55145	4.94988	2.68084	5.06328	5.21325	4.97159	5.02136	4.91156	4.94966	4.90158	4.81302	4.9864	5.04973	5.06444	4.91425	5.14058	4.99768	4.80816	5.01008	4.98876	4.88313	4.88798	4.95607	4.91837	5.03643	5.09848	5.0062
ANKRD44	38.3863	35.8741	31.352	32.0197	46.7937	109.36	76.868	72.0749	74.1143	43.4668	53.1932	66.3575	76.8333	96.6854	105.447	95.9777	68.368	86.2676	76.7738	110.7	84.7805	96.7251	97.993	87.5939	5.89741	5.85033	5.79723	5.82986	6.02726	6.50343	6.7674	6.9205	7.22289	5.98642	6.14702	6.27196	6.40693	6.66522	6.83598	6.63351	6.32988	6.61468	6.47602	7.27731	6.86443	6.80523	7.23799	6.7025
ANKRD45	2.39108	7.18653	-3.01073	-2.65986	7.34607	12.6173	0.938423	5.09124	2.84011	6.89982	-1.77043	8.24478	0.11598	9.474	1.30153	6.77173	0.766091	2.76957	5.2477	6.24929	7.6055	5.71403	9.76707	7.98576	4.99191	5.14711	4.82963	4.84731	5.14154	5.20175	4.96495	5.13568	5.03961	5.13	4.87465	5.15636	4.91897	5.1896	4.97172	5.1216	4.94326	5.00333	5.07967	5.12015	5.1891	5.10385	5.27458	5.1642
ANKRD46	78.7407	64.4934	69.6641	77.1679	55.7209	71.023	31.6347	21.6953	21.4297	114.053	87.4536	79.4756	91.057	106.074	55.4189	87.5198	90.2311	81.5294	90.973	61.736	45.7749	70.6488	37.4414	45.6123	6.50186	6.3463	6.4393	6.5664	6.17058	6.11017	5.9527	5.7991	5.95805	6.87271	6.60384	6.43043	6.57957	6.76942	6.18744	6.5357	6.61395	6.55977	6.6633	6.55849	6.21696	6.46782	6.13355	6.08615
ANKRD47	13.6591	19.3653	15.2427	14.4415	18.4037	11.9285	0.21341	3.44306	13.5604	16.993	16.3929	8.43305	9.86144	13.4765	12.987	13.4124	20.505	10.4308	6.96234	11.1387	11.3211	19.0742	8.43929	7.28397	5.33854	5.48824	5.39742	5.39408	5.44045	5.18772	4.94021	5.07114	5.60462	5.40997	5.40598	5.16186	5.19965	5.29325	5.30647	5.28717	5.47272	5.23224	5.12603	5.28687	5.31537	5.49936	5.22497	5.14516
ANKRD49	117.526	101.685	92.5732	98.0038	94.564	183.991	88.8464	99.3862	46.6177	141.414	129.714	155.014	179.396	184.95	146.328	148.199	161.031	136.286	152.67	127.675	120.08	139.013	109.571	100.062	6.91813	6.76488	6.71411	6.80292	6.65851	7.09652	6.93292	7.33223	6.6633	7.14426	7.02949	7.2224	7.41766	7.48584	7.25089	7.17067	7.34428	7.17804	7.29554	7.47505	7.32792	7.26461	7.3974	6.85001
ANKRD5	10.3851	6.92673	5.15688	7.9263	9.4804	7.90296	1.67762	1.15194	1.50324	7.58606	5.06549	4.06909	2.74523	3.28401	0.579064	6.83519	3.15331	0.164895	0.764984	1.38669	0.0206768	3.31372	1.01154	6.36651	5.24257	5.13806	5.09135	5.18847	5.20525	5.1048	4.99048	4.98311	4.98578	5.15144	5.08044	5.03783	5.00102	5.01499	4.9495	5.12352	5.01635	4.92169	4.94034	4.95458	4.93378	5.02885	4.96203	5.11738
ANKRD50	52.7014	48.5996	53.6373	41.4531	45.9243	33.5196	25.6989	29.5149	23.7163	43.6354	43.345	40.8786	39.9992	40.8438	32.4898	43.6423	42.4521	34.2012	47.4017	15.2592	24.4967	38.3396	20.9807	38.1835	6.16028	6.09743	6.22761	6.02644	6.01103	5.59631	5.80055	6.03909	6.04957	5.98888	5.98819	5.85953	5.86321	5.88361	5.76787	5.9217	5.92636	5.79988	6.03347	5.43128	5.72385	5.92929	5.67605	5.93882
ANKRD52	29.2843	42.2157	25.8732	36.5613	29.2322	35.7087	23.0103	13.7487	13.1111	35.962	31.9683	54.7907	49.9332	75.0496	78.9101	69.892	44.9588	41.0666	63.8872	38.6684	37.0471	46.9446	41.6564	33.6107	5.71297	5.98306	5.67629	5.92879	5.68537	5.63856	5.72222	5.50669	5.58367	5.84135	5.77125	6.09743	6.03027	6.40031	6.51711	6.31668	5.96785	5.93504	6.29354	6.10477	6.04342	6.10094	6.232	5.84475
ANKRD53	11.9513	5.86801	17.5252	9.65585	11.4427	9.88658	15.0093	4.63363	5.5061	10.0528	10.1564	4.74784	11.8446	10.9077	9.14863	13.0891	13.6894	6.56948	3.87057	19.3485	9.06572	9.6777	4.9527	15.0766	5.28519	5.1051	5.46127	5.24304	5.26038	5.14711	5.46893	5.11499	5.16374	5.22588	5.23461	5.05871	5.2538	5.2269	5.20254	5.28043	5.3054	5.12114	5.03766	5.57019	5.23783	5.22455	5.0986	5.38352
ANKRD54	134.054	123.955	123.712	97.9217	104.773	116.837	61.1617	74.8552	51.715	127.063	158.142	169.764	184.658	177.277	213.472	189.337	151.862	161.486	142.415	100.606	103.607	164.432	114.225	137.369	7.06877	6.99052	7.04222	6.80131	6.76268	6.5641	6.51944	6.96584	6.77425	7.00848	7.2745	7.34525	7.4596	7.42642	7.76812	7.52368	7.25676	7.39226	7.1944	7.14791	7.14171	7.49505	7.45229	7.24373
ANKRD55	-5.3078	-1.29983	-6.50476	-4.14082	0.159501	-3.12188	-3.19044	-3.80681	-1.16908	-3.84633	-7.14057	-6.77672	0.599904	2.80068	-5.22633	1.52082	4.1357	-1.66478	2.94699	-1.98339	-3.39081	-3.86244	-4.5027	-3.11827	4.7307	4.88051	4.71154	4.79942	4.93114	4.84055	4.82153	4.79527	4.88099	4.80498	4.70523	4.69412	4.93373	5.00027	4.76857	4.97383	5.04635	4.86295	5.00901	4.84178	4.82348	4.80665	4.77996	4.82938
ANKRD56	-4.66748	-0.0421944	-3.07983	2.31047	-4.25086	-2.32821	-0.507324	-0.263124	-2.41383	2.38747	0.586487	0.685877	-3.64287	-5.24557	-0.10955	-4.09551	2.91348	-0.14233	1.2215	1.73229	-7.62378	-2.47716	1.23575	-2.08908	4.75181	4.92077	4.82678	5.00777	4.7913	4.86108	4.91527	4.92727	4.83265	4.99216	4.94573	4.93732	4.79982	4.74339	4.92903	4.79741	5.01028	4.9116	4.95458	4.96671	4.68975	4.84821	4.96965	4.85968
ANKRD57	951.033	847.668	881.201	896.525	867.057	1010.2	515.5	372.387	276.817	660.366	587.106	442.404	447.941	535.492	436.67	730.171	560.592	447.195	554.536	309.661	236.798	432.408	189.493	308.501	9.62977	9.48518	9.51473	9.6579	9.50177	9.36795	9.20361	9.03252	8.81868	9.17126	8.99653	8.66488	8.63731	8.94258	8.73399	9.46302	9.06549	8.77506	9.08047	8.69197	8.22987	8.79332	8.12022	8.30844
ANKRD6	6.26431	8.44801	7.85161	6.76817	11.2268	8.57778	5.06461	7.16487	6.5709	6.56435	3.81177	7.52592	10.9366	10.9686	10.6675	12.7363	8.98096	10.2578	12.0015	13.6647	10.1237	6.49628	7.12298	4.9097	5.11724	5.18669	5.17349	5.15361	5.25413	5.1194	5.10784	5.22186	5.22425	5.11915	5.04435	5.13877	5.22933	5.22878	5.24339	5.27272	5.18486	5.22843	5.26491	5.37926	5.2732	5.12937	5.1746	5.07312
ANKRD7	2.93543	5.37515	0.757652	4.73314	4.60667	7.29582	3.98584	5.86436	1.59003	3.89676	-0.457378	3.96594	5.90608	3.10796	2.14114	3.49267	-1.37267	2.47454	2.05652	5.39637	3.48355	2.03215	3.21179	1.87573	5.00927	5.08995	4.94939	5.08718	5.06391	5.09001	5.07052	5.16628	4.98889	5.03877	4.91439	5.0354	5.09542	5.01079	4.99663	5.03148	4.87798	4.99451	4.98204	5.09087	5.0462	4.9884	5.03867	4.98233
ANKRD9	315.373	301.056	302.754	285.976	364.464	420.752	229.799	131.365	139.318	287.724	316.057	250.42	288.721	272.482	246.576	253.301	242.614	221.555	224.968	197.386	271.857	282.719	229.611	280.74	8.17239	8.11962	8.14192	8.13334	8.33805	8.20425	8.14709	7.69851	7.97944	8.04868	8.18161	7.88285	8.05163	8.01782	7.95906	7.92273	7.89048	7.81746	7.81336	8.06639	8.40543	8.20761	8.38455	8.17824
ANKS1A	310.481	352.511	313.254	298.215	323.394	304.237	179.921	175.985	105.563	279.048	281.054	325.912	339.909	300.335	280.503	346.209	275.088	229.215	275.026	186.139	197.017	240.553	163.334	243.617	8.15242	8.32646	8.18234	8.18806	8.18081	7.78015	7.84315	8.05372	7.65727	8.0066	8.02573	8.23248	8.27512	8.15797	8.14067	8.35193	8.07081	7.86884	8.10383	7.98633	7.9961	7.98792	7.9173	7.99975
ANKS1B	-0.275693	1.2471	1.27584	0.128653	2.29942	7.33231	-0.749809	1.42072	2.44071	-1.12854	4.37048	6.86899	-0.85305	0.540803	-0.458282	3.988	3.26679	0.269973	1.06635	0.533829	0.722042	-0.681982	2.20606	1.52741	4.90214	4.9623	4.96818	4.93873	4.99543	5.09141	4.90593	4.9929	5.02395	4.88816	5.0611	5.1191	4.88896	4.92983	4.91831	5.04435	5.01983	4.92495	4.95012	4.92595	4.95704	4.90406	5.00144	4.97101
ANKS3	22.5644	22.7294	24.0939	25.5707	16.7272	40.495	18.4562	21.162	9.25297	32.3299	20.6324	51.9359	44.839	56.2088	66.7277	63.4522	50.353	55.3429	50.5007	43.9696	58.0348	55.07	38.675	37.1635	5.55844	5.57315	5.64025	5.68892	5.40046	5.70729	5.58637	5.78105	5.37601	5.76385	5.51248	6.05211	5.94518	6.13464	6.3557	6.22388	6.06062	6.18787	6.08367	6.2116	6.4447	6.24221	6.16291	5.91841
ANKS4B	3.46184	-4.98936	-4.22059	-6.6449	-1.78249	-5.90799	2.27544	0.880621	-2.65737	-3.70763	-4.08658	1.11493	1.06534	-2.77635	-3.74456	-0.185775	1.29584	-3.98288	4.00865	-2.2171	2.68396	4.19409	-1.86312	-0.506279	5.02677	4.76001	4.78942	4.72137	4.86925	4.76441	5.01193	4.97259	4.82356	4.8084	4.80059	4.95083	4.94881	4.81945	4.81622	4.92129	4.96007	4.7866	5.04132	4.83321	5.01991	5.05662	4.86872	4.90917
ANKS6	12.6395	12.1309	6.55279	6.86251	9.00266	2.3226	-2.47983	3.57752	2.14136	9.7715	4.59103	3.36118	4.79134	13.4387	7.9129	15.6781	7.63304	9.35814	13.7994	10.8975	6.59745	4.36777	6.5506	4.61308	5.30591	5.29475	5.13488	5.15714	5.19013	4.97907	4.84532	5.07612	5.01188	5.21721	5.06778	5.01736	5.0621	5.2921	5.1675	5.34186	5.14521	5.20046	5.30886	5.27995	5.15154	5.06175	5.15391	5.0637
ANKZF1	35.4852	32.1072	27.5517	31.1449	27.6943	44.8676	24.4737	16.9714	3.80656	25.7679	39.7205	70.6014	76.4583	67.8452	73.8987	60.7677	43.3635	37.5018	50.8094	34.8507	53.4056	50.5904	55.532	40.0578	5.84372	5.78078	5.71714	5.80993	5.65501	5.78122	5.76892	5.64076	5.08326	5.6284	5.92427	6.32309	6.40218	6.30787	6.45042	6.18275	5.93962	5.86597	6.0899	6.00311	6.36722	6.16354	6.51665	5.97809
ANLN	601.643	491.423	494.404	460.823	670.992	1161.91	707.633	612.448	371.385	744.127	1117.91	1049.52	983.936	999.899	770.109	843.773	818.628	736.074	650.437	510.859	749.085	1009.69	605.611	1142.6	9.00076	8.75465	8.75682	8.75995	9.14546	9.60272	9.65696	9.67452	9.17616	9.31865	9.89404	9.91697	9.77722	9.84924	9.56051	9.69707	9.63279	9.48931	9.31738	9.40637	9.83168	10.0213	9.75105	10.0756
ANO1	728.899	692.168	624.745	609.498	704.696	833.79	439.331	267.788	156.283	536.924	550.266	457.916	408.888	380.122	312.046	348.558	314.032	331.471	251.768	249.121	405.396	513.567	323.326	596.991	9.26586	9.21519	9.06052	9.13088	9.21071	9.12531	8.99768	8.62311	8.11628	8.89258	8.9113	8.71924	8.51874	8.46869	8.27799	8.36207	8.25082	8.36382	7.97315	8.37757	8.9683	9.03252	8.8762	9.17016
ANO10	58.9537	61.8357	62.6721	62.4488	67.3867	72.5076	48.3112	26.1014	17.8985	56.6805	66.467	113.959	119.726	100.555	78.8147	62.3095	92.9901	75.0771	81.6646	50.5134	101.385	71.7724	106.48	137.85	6.24263	6.30969	6.35725	6.38315	6.32774	6.12737	6.29066	5.93107	5.8134	6.19763	6.33453	6.83308	6.8766	6.70326	6.51581	6.20842	6.64483	6.47309	6.53877	6.35071	7.1154	6.4898	7.35848	7.24796
ANO2	8.14621	3.54537	19.1048	10.6298	5.43199	8.64308	9.83422	3.29236	0.150633	3.57187	4.77595	11.0725	16.3048	2.89813	3.70543	0.709016	8.52072	1.56401	3.53208	0.373469	2.79827	4.84197	2.88359	5.87503	5.17563	5.03144	5.50742	5.27227	5.08646	5.12056	5.27844	5.06479	4.93323	5.03003	5.07312	5.22777	5.36649	5.00411	5.0443	4.94805	5.17137	4.96723	5.0269	4.91985	5.02327	5.07741	5.02677	5.10361
ANO3	-1.51561	-1.21212	-0.0250933	-6.06034	-3.71456	-1.16185	0.341538	-4.14118	-2.07869	-5.20289	-8.22807	3.09214	-2.38546	-6.56728	-4.00796	-0.547179	0.410057	-0.0343284	0.848615	-3.7641	-5.69978	-7.48431	-2.34131	-2.0731	4.85818	4.88305	4.92606	4.74006	4.80805	4.8904	4.94404	4.78319	4.84512	4.76399	4.6679	5.00927	4.83953	4.69822	4.80742	4.90992	4.9317	4.91527	4.94329	4.77943	4.75123	4.69214	4.85278	4.85991
ANO4	10.257	-3.66486	-0.260178	3.14482	5.01613	-3.2021	-3.48051	2.83614	3.97539	5.63621	1.27013	1.78678	0.209882	0.704136	0.395081	-2.8927	1.38796	0.908413	0.97463	0.987307	3.76609	-1.62139	-2.74133	1.65802	5.2388	4.80395	4.9176	5.03383	5.07509	4.83848	4.81185	5.04753	5.09116	5.09338	4.9664	4.97122	4.92159	4.93532	4.944	4.83536	4.96319	4.94657	4.94686	4.94023	5.05498	4.8752	4.8409	4.97592
ANO5	4.6305	-1.96608	0.628044	9.15963	7.42084	5.25829	-3.38338	-3.49811	2.29476	4.59809	0.503266	1.03177	2.6321	-2.40924	-1.36265	2.14053	-0.525192	8.57939	-1.42643	-1.93105	0.0173606	-2.12491	4.21989	-3.57205	5.06813	4.85822	4.9451	5.22831	5.14405	5.04605	4.81521	4.80717	5.01801	5.0602	4.9436	4.9481	4.99786	4.83307	4.8894	4.99127	4.90248	5.17722	4.87083	4.84339	4.93369	4.85841	5.07301	4.81531
ANO6	458.679	448.047	435.38	378.187	415.946	530.443	358.281	248.601	163.686	458.19	401.207	497.18	441.845	411.705	319.364	334.429	404.849	334.838	352.573	318.125	321.705	329.308	322.565	563.969	8.65692	8.63392	8.5968	8.51159	8.51098	8.50468	8.74322	8.5367	8.17461	8.67643	8.49176	8.81538	8.61844	8.58136	8.30171	8.30844	8.60619	8.37652	8.43218	8.73479	8.64377	8.42548	8.87014	9.09927
ANO7	0.00146556	0.0454317	0.590339	1.62327	-2.12031	1.96302	0.911194	-0.118445	-1.54825	2.6152	0.567536	-0.327637	2.29786	0.522093	-2.71698	-4.38807	1.55584	-2.34901	1.15762	-0.780136	1.56858	-2.07616	-2.93097	-1.33697	4.91163	4.92335	4.94396	4.98575	4.85725	4.96999	4.964	4.93323	4.86605	4.99912	4.94523	4.90519	4.98676	4.92914	4.84693	4.78904	4.96811	4.8415	4.95264	4.88219	4.98457	4.86024	4.83495	4.88362
ANO8	30.8417	37.2404	29.8682	38.2195	72.9869	56.0217	32.994	21.7389	13.4486	31.5601	36.3181	60.5106	42.7491	75.6912	71.2194	52.5773	43.697	38.3807	42.8406	51.6822	70.1506	82.7154	67.638	58.4249	5.74547	5.88361	5.76297	5.96722	6.40281	5.94168	5.98446	5.80135	5.59699	5.74881	5.85462	6.18958	5.91017	6.40693	6.41376	6.05617	5.94659	5.88101	5.95505	6.37692	6.64483	6.6407	6.7399	6.29741
ANO9	30.6612	30.4317	25.4971	35.025	36.2255	74.0439	23.3586	8.66765	7.51606	28.2527	29.088	47.7048	42.741	38.2944	52.0485	39.7658	28.3713	29.0501	29.3884	66.1683	84.2799	72.1644	96.0365	49.4079	5.74121	5.73989	5.66719	5.89426	5.84278	6.1464	5.73539	5.28552	5.2768	5.67952	5.70641	5.98352	5.9099	5.83134	6.1302	5.84973	5.64653	5.6935	5.68743	6.62939	6.85613	6.49672	7.21009	6.15619
ANP32A	52.1022	40.645	61.1702	42.9461	52.8923	67.9327	22.549	12.0669	9.13931	44.4398	37.7792	44.7706	33.387	30.8735	38.5323	30.2825	31.3231	53.6848	24.5844	25.7862	37.5928	50.9982	21.5815	39.6203	6.15028	5.9548	6.33986	6.0544	6.13287	6.07659	5.71161	5.42697	5.371	6.0034	5.88453	5.93504	5.73227	5.68326	5.88631	5.66323	5.71587	6.16168	5.58217	5.77438	6.0524	6.17122	5.6969	5.96904
ANP32B	5480.1	5112.27	5235.43	4922.85	4924.38	5785.88	2750.13	1739.07	1544.33	5120.37	4747.71	3546.69	3688.08	3849.38	3595.93	3490.16	3606.25	3861.82	3737.63	2952.7	2992.05	4028.83	2450.09	3695.98	12.19	12.0909	12.0723	12.1674	12.0837	11.9731	11.5029	11.0115	10.7785	12.196	12.0837	11.7612	11.7469	11.8438	11.7514	11.8103	11.8989	11.9354	11.947	11.8653	11.7514	12.0668	11.6411	11.8226
ANP32C	-6.561	-6.0559	-9.39639	-5.66083	-5.24273	0.613292	-3.14041	-2.86495	-2.62336	-8.20013	-3.22864	-0.380705	-5.11975	1.21051	-9.29143	-5.96937	-5.64045	-5.33224	-6.9728	0.381877	-10.3509	-9.82115	-8.58647	-0.484459	4.68421	4.72668	4.62527	4.75181	4.7585	4.93635	4.8231	4.82979	4.82468	4.66376	4.82963	4.90379	4.75008	4.9512	4.63454	4.73758	4.73691	4.74252	4.69364	4.9203	4.5989	4.60919	4.63896	4.91019
ANP32D	-2.73862	-2.47203	-2.60636	0.104242	-2.45719	-0.500104	2.18905	0.0459275	-1.99236	-6.28382	-5.84026	0.400987	1.77166	5.12513	-3.05578	-0.489608	-0.935379	-5.32981	-3.40338	0.599185	-3.64702	-1.26276	3.66606	-3.11724	4.81815	4.84201	4.84287	4.93804	4.84685	4.90775	5.00822	4.93942	4.8483	4.72953	4.74668	4.92773	4.96968	5.06932	4.83632	4.91167	4.8902	4.74272	4.80737	4.92768	4.81526	4.88558	5.0541	4.82944
ANP32E	9.21768	10.7665	5.11034	6.16476	8.91328	7.04531	10.0565	0.988181	2.57045	15.4884	11.2348	5.95743	14.1505	5.78662	5.23769	4.97099	10.4633	3.2563	11.3414	7.11758	6.92206	4.52547	12.52	5.93842	5.2069	5.25524	5.09014	5.13266	5.18734	5.08493	5.28588	4.97653	5.02899	5.37366	5.26368	5.09188	5.31331	5.08876	5.09081	5.07256	5.22158	5.01983	5.24967	5.15053	5.1642	5.06733	5.37004	5.1048
ANPEP	-2.20427	0.48312	3.20953	5.13901	4.84118	6.74459	8.48833	1.71013	4.59427	1.49944	4.06441	6.45999	1.33761	-0.552982	5.30867	5.92268	2.26076	4.07959	2.26199	-0.88387	2.14379	5.01012	6.99411	-6.54995	4.83508	4.93784	5.02874	5.09972	5.07035	5.07851	5.23134	5.00404	5.11862	4.96668	5.05162	5.10645	4.95682	4.89433	5.09255	5.09797	4.98989	5.04554	4.98896	4.87874	5.00271	5.08317	5.16948	4.72314
ANTXR1	39.1827	40.4524	39.3209	35.7431	40.0553	62.9984	30.8476	19.6277	10.2378	47.4829	59.1124	79.3367	84.5583	74.4027	59.2639	62.9271	85.1405	74.5255	81.2253	75.4137	71.553	62.6341	63.2461	109.981	5.91294	5.95041	5.97155	5.90826	5.91886	6.0243	5.93198	5.72987	5.43227	6.05734	6.23832	6.42991	6.49886	6.39119	6.24742	6.2156	6.55118	6.4649	6.53322	6.78577	6.66774	6.35432	6.65725	6.96518
ANTXR2	208.268	205.768	190.409	137.484	219.875	241.034	144.666	90.6794	63.6664	176.902	230.44	198.705	214.516	173	179.039	182.183	215.754	210.017	184.728	118.904	33.7214	138.736	38.1695	109.569	7.6566	7.64958	7.57955	7.20898	7.68069	7.4684	7.56962	7.20653	7.03125	7.42158	7.78142	7.56445	7.65059	7.3864	7.52478	7.46649	7.7296	7.74641	7.55511	7.36825	5.96973	7.26318	6.15241	6.96038
ANUBL1	-2.26594	0.247555	-1.49324	-6.45051	-2.38763	-4.79886	-0.371475	7.85594	-0.272204	-1.06813	-2.37523	-0.972265	-3.25768	-7.02137	-4.08356	-4.5637	-0.239372	-4.94461	0.89475	-2.67957	-4.1666	-5.2208	-6.20294	-3.53441	4.83265	4.92959	4.87903	4.72712	4.84922	4.79418	4.92027	5.2505	4.91592	4.89003	4.85624	4.8855	4.81211	4.68481	4.80514	4.78299	4.91113	4.75556	4.94457	4.81773	4.79846	4.76378	4.72516	4.81662
ANXA1	6246.29	5505.86	6054.11	5081.82	4997.99	6621.4	4899.91	4801.34	5655.81	5423.18	4542.55	3226.43	3425.19	3258.41	2813.59	3163.19	3150.98	3247.07	3301.85	1960.33	1993.57	2930.98	1675.88	2902.8	12.3824	12.2027	12.2998	12.1821	12.1025	12.19	12.3445	12.3521	12.3143	12.2587	12.0146	11.6136	11.6325	11.6191	11.4044	11.6325	11.6945	11.6715	11.7999	11.357	11.1956	11.5732	11.1743	11.4783
ANXA10	10.7975	21.0846	23.7061	20.8941	10.5592	26.2169	10.4987	13.428	15.8708	9.70363	16.3608	38.2192	43.7538	39.0582	19.7736	46.8364	37.8906	39.0144	48.4571	17.3195	10.049	13.2874	12.0716	10.7062	5.25297	5.53544	5.63121	5.56755	5.23531	5.46966	5.30266	5.49522	5.71562	5.21527	5.40434	5.81461	5.92607	5.84751	5.47134	5.96838	5.84431	5.8957	6.05501	5.50288	5.27041	5.33364	5.35505	5.24844
ANXA11	175.509	161.346	158.851	158.509	159.686	200.055	106.157	55.0763	33.3717	158.738	117.487	115.195	111.431	114.063	127.515	130.419	106.982	98.0912	83.3332	97.4588	108.554	116.411	143.418	107.202	7.42315	7.33953	7.35493	7.38507	7.27033	7.2033	7.15253	6.63072	6.33986	7.28881	6.91592	6.84361	6.78786	6.85135	7.07166	7.00848	6.80523	6.74801	6.55785	7.10915	7.20653	7.02799	7.74395	6.9319
ANXA13	-2.07621	-1.68969	-2.51065	0.581404	-1.76654	0.114714	1.04625	0.365581	0.0643799	-1.85462	-2.13712	1.02645	-3.75191	-0.415218	-1.84861	-1.02675	0.698769	-0.357428	-3.50019	1.42129	-0.752377	-2.4735	-0.306075	-0.223193	4.83953	4.86776	4.84608	4.95276	4.86996	4.92393	4.96823	4.95201	4.92998	4.86573	4.86348	4.94793	4.79555	4.89851	4.8736	4.89446	4.94127	4.9048	4.80428	4.95578	4.90913	4.8483	4.91859	4.91845
ANXA2	7340.42	7356.14	7336.58	7149.56	7139.05	7519.66	5801.81	4859.54	4409.75	6946.39	6147.81	4837.93	5264.72	4843.35	4625.35	4599.37	4559.23	4247.45	4265.13	3002.93	3604.66	4818.85	3025.11	4696.98	12.6244	12.6244	12.6013	12.6767	12.6188	12.4085	12.522	12.3875	12.0264	12.6188	12.4669	12.2085	12.2587	12.19	12.1072	12.1821	12.2838	12.0723	12.1536	11.8771	12.0001	12.3072	11.947	12.2501
ANXA2P1	3663.26	4524.82	3972.18	2953.71	3750.86	5104.44	2341.96	1740.64	2136.32	3534.91	3172.94	2601.52	2373.62	2252.04	2149.43	1743.7	2085.39	2000.32	1933.9	1181.83	1585.15	2329.75	1377.93	2030.48	11.6049	11.947	11.6545	11.4234	11.6633	11.7415	11.2423	11.0145	11.1353	11.5732	11.4824	11.2396	11.0884	11.0554	11.0299	10.7438	11.0573	10.966	10.9831	10.647	10.8782	11.2556	10.8753	10.9153
ANXA2P2	14425.9	13100.5	12267.5	13140.3	12670.4	12321	12615.2	12871.2	12804.2	12702	12813.6	12418.3	12467.4	14062.9	12873.4	12371.5	12816.1	13184.6	12686.8	14079.5	14094.5	13884.5	12991	13542.4	13.707	13.6292	13.3882	13.5987	13.5987	13.3882	13.6292	13.5987	13.4206	13.5987	13.6839	13.707	13.5678	13.8415	13.5678	13.5987	13.707	13.6839	13.707	13.8415	13.6839	13.7422	13.6839	13.7422
ANXA3	510.599	437.524	566.421	535.476	455.309	516.4	199.249	193.649	209.038	352.3	366.02	385.591	475.295	416.304	293.596	335.884	364.123	374.151	384.059	182.686	143.933	309.493	120.444	208.162	8.78873	8.59949	8.93178	8.95638	8.62368	8.47557	7.96611	8.18277	8.46705	8.31542	8.38187	8.46646	8.72437	8.60365	8.19838	8.31338	8.46869	8.53436	8.56459	7.96134	7.57302	8.33926	7.51919	7.79947
ANXA4	23.571	12.7444	19.2704	14.4783	14.161	22.0243	11.8602	2.99778	3.27354	31.2346	10.7818	12.3966	18.9372	18.55	12.1791	11.8217	9.67297	14.5947	22.7571	3.77078	11.266	6.29945	3.26796	6.79892	5.58093	5.3112	5.51148	5.39513	5.33424	5.38987	5.35148	5.05388	5.05862	5.74216	5.24895	5.25772	5.4278	5.41997	5.28656	5.24956	5.20223	5.34722	5.53617	5.03657	5.3135	5.12323	5.04036	5.13138
ANXA5	3323.43	3182.38	3446	2879.09	2746.47	3275.64	2453.02	2539.39	2439.82	2735.22	2664.75	2426.77	2337.05	2257.35	2076.21	2072.78	2099.87	2086.06	1964.56	1065.64	807.01	1371.42	573.883	1520.48	11.41	11.4016	11.4701	11.357	11.1956	11.0382	11.3331	11.4952	11.2901	11.2584	11.2238	11.1653	11.0509	11.0625	10.9944	11.0404	11.0625	11.0433	10.9985	10.4901	9.93377	10.4942	9.66834	10.4841
ANXA6	2.09674	-1.88333	2.35039	1.70675	0.36054	1.64764	1.38362	-0.00379707	0.950167	-0.113632	1.039	1.4703	3.82549	4.25859	1.12145	-3.51575	0.437004	1.72612	0.171464	1.34045	-1.11978	1.60497	0.365507	2.16812	4.98233	4.86122	5.00263	4.9877	4.93709	4.96146	4.98034	4.93761	4.96484	4.91853	4.95906	4.96181	5.03375	5.04354	4.96611	4.81401	4.93249	4.97162	4.92137	4.9525	4.89729	4.97434	4.94114	4.99072
ANXA7	499.071	396.156	457.846	486.431	407.019	523.223	301.1	290.075	217.453	497.558	486.718	424.547	551.816	470.034	347.698	524.242	516.72	473.222	481.389	234.162	197.906	321.871	163.391	275.13	8.76152	8.4729	8.66133	8.83079	8.48217	8.48894	8.50047	8.72721	8.51676	8.78236	8.7574	8.61017	8.95296	8.76241	8.4098	8.94822	8.94822	8.85201	8.87301	8.29115	8.00021	8.39542	7.91775	8.15551
ANXA8	699.145	784.761	745.693	627.817	652.409	536.275	191.717	116.866	92.3591	762.378	637.924	266.307	256.248	243.882	192.598	220.701	294.521	289.414	317.605	248.654	279.387	318.053	323.552	372.223	9.2138	9.381	9.29815	9.17016	9.10391	8.51676	7.91583	7.55155	7.49637	9.34558	9.11878	7.96718	7.89802	7.86971	7.62251	7.72594	8.17355	8.18864	8.29115	8.37433	8.44903	8.3781	8.87844	8.54696
ANXA8L1	222.77	230.13	287.972	269.854	231.468	167.019	63.5208	41.5829	21.5143	256.458	233.878	91.5354	138.945	90.1543	73.6736	81.8047	109.188	105.844	125.849	104.302	128.365	161.807	124.393	150.314	7.73763	7.78426	8.0863	8.06076	7.75187	6.97538	6.56118	6.34129	5.96216	7.9074	7.80546	6.58625	7.06293	6.58449	6.44597	6.47157	6.83082	6.83982	7.02985	7.19573	7.42054	7.47362	7.5585	7.36486
ANXA8L2	983.502	934.925	957.751	892.242	820.112	614.428	284.425	157.15	126.371	1082.5	973.029	571.323	634.045	659.808	529.853	656.421	791.429	820.71	892.472	698.636	772.674	710.419	746.714	646.877	9.6712	9.62279	9.62977	9.64876	9.42484	8.69011	8.42814	7.9266	7.86289	9.83778	9.68669	9.02795	9.14205	9.24644	9.0242	9.28958	9.57925	9.64274	9.76758	9.86724	9.87153	9.51381	10.0321	9.28205
ANXA9	12.3196	0.155979	3.11978	5.39517	6.6753	5.65129	2.1923	-2.19589	1.21166	4.81953	2.18724	5.0804	5.28009	4.51323	2.40413	10.1391	1.62761	4.43491	6.96911	4.75699	18.7487	10.203	18.9532	12.1935	5.29635	4.92664	5.02613	5.10784	5.12254	5.05425	5.00836	4.85416	4.97466	5.06721	4.99324	5.06875	5.07746	5.05195	5.0047	5.20786	4.97017	5.05638	5.12609	5.06909	5.55416	5.24366	5.6055	5.29369
AOAH	10.9878	10.619	5.23534	2.74034	4.9742	9.5221	-1.77307	3.57415	1.38131	3.00738	6.96378	7.5527	2.87752	10.6326	3.58759	5.5237	7.27716	3.52908	8.58812	-0.669126	-0.889851	4.10965	-2.86238	1.05192	5.25904	5.25017	5.09401	5.02152	5.07397	5.1391	4.86899	5.07591	4.98068	5.0132	5.13918	5.13961	5.00481	5.21953	5.04127	5.08848	5.13511	5.02837	5.17183	4.88631	4.90458	5.05404	4.83713	4.95825
AOC2	4.76484	0.969735	3.87584	2.37357	5.57205	0.495024	5.62488	8.39141	5.86987	3.71487	2.21862	6.68997	4.86359	5.34768	1.79527	5.67214	2.56473	5.98296	5.12622	1.06412	5.50347	10.6727	8.52006	2.97214	5.07237	4.95373	5.05037	5.00982	5.09135	4.93342	5.12734	5.27301	5.1832	5.03349	4.99414	5.11331	5.06444	5.07612	4.98646	5.0928	4.99965	5.10439	5.07653	4.9427	5.11476	5.2576	5.23017	5.01586
AOC3	6.18821	7.07343	3.72469	2.85898	0.773729	6.39447	6.44539	7.4984	3.11725	2.33752	5.44383	8.27622	2.91347	0.908299	5.92909	8.83121	6.42855	5.96321	5.64336	-1.64613	3.04724	5.04752	-0.781938	4.88516	5.11528	5.14326	5.04569	5.0247	4.94976	5.07083	5.15714	5.23564	5.05195	4.99077	5.09269	5.15732	5.00586	4.94157	5.11152	5.17587	5.10955	5.1038	5.09051	4.8525	5.03237	5.08432	4.90346	5.07246
AOF2	1067.55	994.832	1014.05	1054.45	1110.55	1390.09	932.554	737.396	507.587	999.16	877.934	550.559	641.799	642.324	569.302	610.408	573.83	574.268	650.596	557.835	912.466	816.989	747.917	952.711	9.79528	9.69999	9.71193	9.87663	9.84026	9.84576	10.039	9.92776	9.53142	9.72311	9.54095	8.97368	9.16388	9.20361	9.11878	9.17616	9.10479	9.12531	9.31965	9.53217	10.0786	9.70454	10.0362	9.83168
AOX1	3.15673	-1.14541	3.21968	2.75824	3.08417	2.36122	10.114	24.4139	27.9187	-0.0563814	5.67773	6.07198	11.4263	11.2305	3.98016	7.68028	14.8262	9.21408	7.965	4.17034	-2.58996	0.80297	0.414877	2.96349	5.0172	4.88529	5.02916	5.02178	5.02003	4.9802	5.28702	5.88321	6.18219	4.9199	5.0986	5.09505	5.24383	5.23628	5.05248	5.14593	5.3363	5.19658	5.15349	5.04968	4.85016	4.9492	4.9427	5.01562
AOX2P	11.8997	5.66535	8.80981	-0.403937	1.89291	4.06891	1.84089	2.5354	3.14824	8.44489	5.80197	4.66954	-1.17566	1.07067	4.30233	6.52349	3.11472	2.37143	3.26708	5.19707	0.875706	7.51602	6.22819	8.51326	5.28339	5.09873	5.20525	4.92084	4.98307	5.01972	4.99632	5.03577	5.05345	5.17813	5.10328	5.05621	4.87863	4.94677	5.06191	5.11471	5.01521	4.99135	5.01889	5.08396	4.96238	5.16314	5.14154	5.18102
AP1B1	270.777	274.397	255.317	253.047	232.966	333.795	143.816	104.88	74.8298	220.485	240.59	171.679	162.048	162.345	133.94	170.426	188.228	168.986	198.517	121.311	117.955	200.868	92.231	188.869	7.97796	8.00315	7.939	7.97747	7.76239	7.89203	7.56235	7.40742	7.23689	7.72634	7.84233	7.35944	7.27033	7.29636	7.13703	7.36731	7.54509	7.45577	7.64463	7.39992	7.30427	7.74994	7.14764	7.66447
AP1G1	175.254	160.561	146.243	117.357	139.029	158.368	122.337	152.591	96.4821	162.371	144.091	130.939	128.999	115.023	121.947	134.676	135.623	124.51	132.359	83.632	95.2691	112.184	84.34	124.895	7.42054	7.33411	7.24508	7.00979	7.08562	6.90752	7.35302	7.88606	7.55078	7.31797	7.17246	6.99372	6.97491	6.86159	7.01655	7.04825	7.10123	7.05221	7.09448	6.91735	7.02799	6.97784	7.02022	7.12103
AP1G2	143.635	134.095	131.226	122.382	165.151	236.38	153.557	162.217	95.7907	139.234	171.186	243.201	246.663	243.25	222.841	260.966	211.735	184.293	225.167	157.048	257.796	235.864	228.327	242.704	7.16328	7.08995	7.1154	7.06336	7.31622	7.44349	7.64315	7.96	7.54313	7.12675	7.39467	7.84621	7.84579	7.86352	7.81746	7.96962	7.71109	7.57358	7.81454	7.76812	8.33805	7.95854	8.37957	7.99442
AP1GBP1	6.91568	10.7522	5.32639	6.6733	6.41116	5.28004	2.34843	7.36316	8.56813	3.79548	13.2867	13.4349	12.1271	7.98261	9.37074	6.71988	9.07052	14.2973	12.8855	6.78553	5.41819	6.28815	6.79948	6.12654	5.14032	5.25474	5.09687	5.15053	5.11464	5.04631	5.01395	5.23006	5.33875	5.03581	5.32054	5.28339	5.26265	5.15168	5.20908	5.11965	5.18707	5.33907	5.28687	5.1397	5.11152	5.12285	5.16211	5.10991
AP1M1	523.46	601.888	658.19	645.648	563.011	587.569	319.111	224.296	168.225	557.038	715.76	500.263	540.028	506.407	491.043	485.876	436.042	446.671	530.222	368.378	378.658	514.111	297.682	437.474	8.82296	9.02866	9.13527	9.2138	8.9113	8.63574	8.58254	8.37851	8.20874	8.92945	9.27097	8.82453	8.92217	8.86727	8.89961	8.84839	8.70901	8.77253	9.00566	8.92945	8.87672	9.03641	8.74073	8.77837
AP1M2	229.212	232.059	210.65	186.582	180.787	217.607	130.692	81.1635	57.5515	202.916	164.954	190.251	136.26	183.867	166.101	144.235	163.84	182.07	178.074	123.784	115.707	145.585	77.9347	125.561	7.76758	7.79812	7.70272	7.59248	7.42382	7.32977	7.44655	7.05902	6.90117	7.60926	7.3426	7.50354	7.04085	7.47729	7.41312	7.13756	7.36429	7.5533	7.50687	7.42988	7.28132	7.32507	6.92104	7.12675
AP1S1	594.359	623.807	696.849	500.57	497.67	417.518	160.486	101.84	67.0847	517.878	445.352	508.815	459.995	455.886	444.914	445.82	388.998	439.614	394.173	241.803	276.688	331.549	208.722	342.673	8.98532	9.07802	9.21071	8.86586	8.73524	8.19651	7.69964	7.37246	7.09131	8.84147	8.62816	8.85139	8.67798	8.71994	8.76628	8.71373	8.56216	8.75238	8.60365	8.33088	8.43141	8.43325	8.25942	8.43978
AP1S2	150.075	183.718	187.213	149.155	133.71	189.881	81.4465	61.3817	60.6918	151.604	191.985	187.983	196.351	177.073	133.869	178.227	164.619	144.556	124.567	55.2288	51.1188	125.489	47.5519	101.743	7.21291	7.50128	7.55566	7.30607	7.03726	7.13395	6.82675	6.74304	6.96954	7.23799	7.5393	7.48144	7.54619	7.42428	7.13552	7.43234	7.36791	7.24846	7.01305	6.44597	6.31794	7.12529	6.36655	6.86816
AP1S3	21.1004	13.8421	29.2091	11.5158	20.3733	7.84739	3.61396	2.08077	-1.28737	20.9112	25.0924	7.86676	18.9434	12.3263	7.75351	5.40316	5.47945	4.162	9.17712	6.67719	6.34521	9.74881	6.14214	9.21828	5.52394	5.34533	5.75061	5.30326	5.49346	5.10361	5.05748	5.01892	4.87589	5.51004	5.62134	5.14735	5.42817	5.26292	5.16264	5.08485	5.08459	5.04845	5.18798	5.13621	5.14285	5.2269	5.1391	5.20142
AP2A1	34.3885	47.6267	40.4349	37.1127	47.5556	57.9952	25.9297	23.1907	15.8204	40.5824	42.6197	43.0725	37.4016	35.2794	41.1915	45.586	32.3544	45.6779	40.5265	30.2853	31.3441	50.9881	31.5223	34.8573	5.81984	6.08123	5.99074	5.94249	6.04005	5.96567	5.80993	5.84651	5.71237	5.93474	5.97924	5.89862	5.80812	5.77438	5.9412	5.95194	5.73753	6.02114	5.91237	5.8913	5.91531	6.17058	5.99406	5.87391
AP2A2	32.9979	39.2974	31.0045	31.9137	31.6194	49.7108	32.3668	10.9941	3.29919	36.2642	21.0731	41.5972	25.4438	27.5624	31.9957	38.8745	24.5241	26.3175	17.6272	18.95	20.1137	28.1921	28.7645	25.4413	5.79619	5.92636	5.78859	5.82773	5.74269	5.85011	5.96973	5.38046	5.05954	5.84751	5.5263	5.87149	5.57473	5.61724	5.75821	5.83181	5.56525	5.62874	5.41505	5.55801	5.59275	5.71512	5.91203	5.66164
AP2B1	198.576	179.137	156.055	144.734	164.544	231.591	115.282	79.9882	51.1357	181.275	165.074	260.505	223.997	232.142	248.751	209.535	217.472	197.667	198.356	117.397	120.721	182.633	104.994	174.84	7.57599	7.46712	7.33064	7.2745	7.30825	7.41171	7.26635	7.04183	6.75918	7.45839	7.34525	7.93369	7.71163	7.8032	7.96962	7.65842	7.74008	7.65474	7.64217	7.34984	7.33792	7.63488	7.34078	7.57127
AP2M1	540.745	621.847	552.845	480.779	506.815	696.409	321.63	274.196	279.556	567.248	494.492	487.788	466.829	469.508	469.98	451.019	478.599	436.854	415.743	257.132	279.25	409.501	236.612	358.809	8.87213	9.07571	8.90517	8.81868	8.7631	8.86275	8.5911	8.65329	8.83079	8.95449	8.77253	8.79275	8.69893	8.75995	8.8446	8.73262	8.83347	8.74322	8.67229	8.42278	8.44793	8.7205	8.42441	8.50848
AP2S1	3098.35	3262	3594.94	2953.95	2940.09	3125.52	1757.54	1373.83	1733.16	3012.8	3175.41	2956.11	2910.86	2703.15	2925.84	2658.54	2539.28	2768.36	2676.69	1777.14	1880.66	2263.83	1537.74	2316.34	11.3395	11.4336	11.555	11.4278	11.3009	10.9681	10.8365	10.703	10.9024	11.4016	11.489	11.4586	11.3944	11.3217	11.4655	11.369	11.3464	11.4383	11.4619	11.2396	11.1327	11.1999	11.0484	11.0908
AP3B1	987.676	980.363	986.37	914.792	883.71	1037.38	610.312	534.176	417.548	982.837	951.829	991.849	902.894	825.432	777.827	904.147	928.602	881.157	888.079	542.297	560.821	709.279	442.241	756.864	9.67803	9.67969	9.6649	9.6827	9.5282	9.41005	9.43946	9.49739	9.30124	9.69412	9.64408	9.80667	9.6649	9.58263	9.58103	9.80143	9.82966	9.74206	9.75975	9.49827	9.4183	9.51087	9.29904	9.51699
AP3B2	-0.0328489	-0.202396	4.50472	2.35221	4.3486	3.2556	-5.19353	16.8213	22.5715	-0.974709	2.29018	10.9201	2.9422	-0.421467	8.09696	19.054	4.9707	1.21667	2.19548	1.96405	-2.05775	-4.58245	0.159643	-2.156	4.91032	4.91566	5.07125	5.00935	5.05627	5.00057	4.75	5.63683	6.00281	4.89312	4.99624	5.22467	5.00716	4.8983	5.17315	5.41773	5.07001	4.95623	4.98687	4.97456	4.86717	4.78398	4.93403	4.85837
AP3D1	205.978	207.451	186.887	201.258	196.541	245.128	159.791	161.172	145.483	177.738	159.327	165.373	161.652	156.664	142.285	160.234	140.651	137.842	182.091	101.175	123.127	188.329	106.898	165.78	7.6391	7.66061	7.55419	7.69916	7.53168	7.49505	7.69534	7.95221	8.03218	7.42946	7.28881	7.31141	7.26709	7.25676	7.2188	7.28382	7.15718	7.18986	7.53826	7.15253	7.36154	7.66954	7.36586	7.49346
AP3M1	217.286	242.819	221.327	192.877	218.087	318.079	137.612	92.7263	38.7935	217.404	209.9	276.443	235.304	241.998	224.659	226.743	244.137	197.372	172.262	117.533	126.626	158.207	109.212	166.471	7.70666	7.85241	7.75618	7.64217	7.67215	7.82976	7.50525	7.24216	6.48372	7.70911	7.65342	8.01739	7.78242	7.85821	7.8312	7.76422	7.90316	7.65137	7.45903	7.35258	7.4028	7.44199	7.39226	7.50128
AP3M2	132.757	119.674	103.467	109.634	139.336	170.075	55.3552	29.9852	8.38741	162.796	175.382	261.181	269.774	260.382	254.684	230.926	203.897	202.865	186.089	195.153	203.853	248.471	184.818	217.717	7.05433	6.94865	6.82424	6.93808	7.08995	6.99769	6.41711	6.05063	5.32796	7.32239	7.42259	7.93769	7.96	7.95464	8.00231	7.79208	7.6615	7.69495	7.56235	8.05261	8.03834	8.0389	8.08574	7.85353
AP3S1	211.748	323.696	308.525	248.887	230.979	252.491	106.627	86.6664	71.3507	260.059	173.25	184.48	180.555	184.244	124.678	152.483	153.139	183.848	157.983	95.4834	68.3549	133.662	50.4505	99.2181	7.67547	8.21334	8.16234	7.96293	7.74838	7.53826	7.16086	7.138	7.17587	7.92714	7.40872	7.45286	7.42806	7.47931	7.04387	7.21137	7.27086	7.56904	7.34486	7.07814	6.61811	7.20215	6.42587	6.83681
AP3S2	84.0053	85.53	93.7908	88.7114	93.5211	108.707	101.661	95.2175	58.4308	77.8898	91.3564	130.695	146.66	121.413	126.257	131.928	128.466	109.783	98.1542	52.17	52.0211	60.8735	41.2983	58.4042	6.56202	6.59723	6.72502	6.6921	6.6486	6.49759	7.09966	7.2782	6.92262	6.48408	6.65372	6.98996	7.13154	6.92104	7.05738	7.02537	7.02022	6.88535	6.73656	6.38712	6.33776	6.32963	6.22346	6.29646
AP4B1	589.868	529.238	547.936	601.515	571.154	1927.36	1773.6	995.571	462.989	515.08	540.669	494.388	490.213	444.884	431.794	444.793	387.569	385.402	506.345	358.564	360.063	623.697	315.105	396.76	8.97919	8.85553	8.89719	9.1124	8.92945	10.3042	10.8669	10.2947	9.41259	8.8342	8.88666	8.80853	8.7691	8.6858	8.71578	8.71114	8.556	8.57647	8.94113	8.89481	8.81227	9.33368	8.84045	8.64039
AP4E1	236.569	260.052	202.495	160.923	246.42	250.719	175.463	174.655	100.848	226.07	203.009	254.545	244.871	245.638	287.251	296.559	280.421	250.657	277.366	161.516	159.801	183.319	140.757	163.292	7.81071	7.93369	7.65342	7.40334	7.82387	7.52552	7.81071	8.04529	7.60397	7.75886	7.61654	7.90269	7.83513	7.87589	8.17355	8.14804	8.10426	8.00352	8.11349	7.80582	7.72445	7.63868	7.71722	7.4719
AP4M1	33.4724	36.3811	51.8579	38.0534	48.7199	110.078	45.0659	22.9882	9.09218	40.2168	43.8719	38.4702	53.8957	38.5948	44.3498	41.7579	38.5695	40.534	36.9671	30.6147	22.693	40.2075	27.2141	29.6658	5.80572	5.86597	6.19911	5.96341	6.05699	6.50825	6.23604	5.83975	5.3671	5.92879	5.99743	5.81875	6.08489	5.83771	6.00081	5.88631	5.85928	5.92294	5.84232	5.8981	5.67172	5.96366	5.87062	5.76016
AP4S1	5.95578	6.84683	3.72453	3.45775	9.55467	8.74424	7.20603	7.45579	2.80938	8.4295	2.38067	4.42969	14.6921	0.843411	1.14188	7.73325	1.74244	15.8146	13.2426	12.3449	5.13746	6.78428	6.23699	1.87221	5.1093	5.13528	5.04559	5.04422	5.20786	5.12301	5.18582	5.2339	5.03813	5.17702	4.9992	5.04869	5.32622	4.93942	4.96711	5.14754	4.97412	5.37637	5.29606	5.33454	5.10033	5.13953	5.1422	4.9822
APAF1	42.8113	28.7955	37.67	37.9055	37.5778	33.8835	20.0508	25.4426	23.0428	34.8244	56.9785	51.763	43.5504	47.299	69.3139	60.9219	45.3489	57.9049	59.1874	37.8745	56.8593	51.329	41.4468	55.2201	5.98212	5.71271	5.9379	5.9604	5.87445	5.60462	5.63467	5.91203	6.01936	5.81717	6.20413	6.04863	5.9223	5.99113	6.38819	6.18601	5.97618	6.22801	6.22153	6.08551	6.42746	6.17863	6.22684	6.25119
APBA1	-1.87935	-3.96567	2.55036	-2.61281	0.363576	-0.323014	-5.78325	-3.32533	-1.31653	0.0495298	1.14383	-3.49239	-2.29481	0.822552	-1.07117	4.54255	-1.7516	-2.1286	-3.70214	-1.25088	1.20404	-1.9008	-2.26539	-1.10804	4.84685	4.79365	5.00879	4.84962	4.9372	4.91255	4.73058	4.81275	4.87498	4.92274	4.96238	4.80395	4.84281	4.93838	4.8987	5.06121	4.86506	4.849	4.79835	4.86618	4.97339	4.86618	4.85525	4.89067
APBA2	-3.47905	-1.25936	-4.12612	-2.83076	0.190568	2.07032	-4.02058	0.22962	-0.0102559	-4.859	-7.55682	-3.73936	-2.56573	-2.67322	-0.987258	-2.54348	-4.06053	-1.8273	-1.72625	-1.20816	0.512287	0.952774	-3.55434	-4.31344	4.7917	4.88186	4.79238	4.8421	4.93191	4.97234	4.79359	4.94686	4.92671	4.77459	4.69287	4.79534	4.83384	4.82307	4.90158	4.84633	4.78563	4.8583	4.86135	4.86734	4.94994	4.95329	4.81408	4.79151
APBA2BP	19.6736	20.6809	15.1494	25.0387	31.4496	25.383	15.851	11.9144	11.9938	16.2462	18.7792	27.4886	29.5313	29.8184	25.8926	30.3955	30.3776	24.666	24.4026	23.7726	27.3001	28.2827	24.3694	24.4687	5.48982	5.52578	5.39466	5.67483	5.73785	5.45468	5.49866	5.42109	5.52961	5.39072	5.46514	5.60207	5.65153	5.6579	5.62498	5.66554	5.69391	5.58602	5.57832	5.711	5.80055	5.71714	5.78881	5.63627
APBA3	115.995	139.712	141.151	116.38	136.831	190.957	180.455	239.015	161.958	121.318	151.531	189.139	185.079	198.77	197.334	178.62	164.672	176.934	187.211	140.756	178.063	176.697	158.28	164.87	6.90311	7.14171	7.19772	6.999	7.06742	7.14523	7.84621	8.47223	8.16385	6.94895	7.22521	7.49637	7.46268	7.58242	7.65805	7.43577	7.36905	7.51276	7.57088	7.61421	7.8577	7.59004	7.87694	7.48584
APBB1	2.63992	0.61503	-3.49474	-2.07458	-1.7023	-2.75201	-1.24855	3.21003	-3.59516	0.330668	0.823815	-1.19348	2.92327	-2.11894	-1.65698	-1.60345	-0.0181706	0.4031	0.514587	-1.53069	-0.965717	-1.12551	-2.36143	1.28519	5.0008	4.94157	4.81259	4.86754	4.87194	4.8508	4.88858	5.06121	4.78934	4.93162	4.95264	4.87866	5.00607	4.84182	4.87975	4.87666	4.91859	4.92927	4.93236	4.85691	4.90214	4.89006	4.85223	4.96456
APBB1IP	15.8483	20.8411	28.0308	33.244	26.4286	45.8966	25.1676	14.3622	13.8201	34.5588	41.5415	35.8342	22.2892	21.3081	15.8408	22.4965	19.2374	21.6912	17.4956	19.0912	38.5744	30.8701	24.2011	49.8381	5.3966	5.52935	5.72987	5.85506	5.62805	5.79552	5.79045	5.53395	5.61799	5.8126	5.96216	5.76817	5.50365	5.47941	5.37789	5.4946	5.44332	5.51873	5.41199	5.56223	6.07252	5.77593	5.78284	6.16206
APBB2	4.67963	4.1759	1.16019	6.20067	1.09782	5.08947	6.34957	2.67911	3.63668	-0.0582926	-0.599704	3.50389	3.07073	5.81843	0.901425	1.69406	1.37238	0.80291	5.33987	1.25466	4.57283	5.40004	3.35292	7.14193	5.07023	5.05239	4.96421	5.13355	4.95965	5.04176	5.15314	5.04168	5.075	4.91985	4.90954	5.02098	5.01098	5.08963	4.95941	4.9788	4.96272	4.94326	5.08192	4.94887	5.08153	5.09445	5.04354	5.14163
APBB3	343.223	358.951	298.296	331.452	345.279	315.911	108.572	45.6421	19.3778	256.866	342.754	351.495	344.969	361.91	342.074	308.702	401.823	359.747	375.037	378.574	603.245	477.267	617.185	493.978	8.27678	8.35264	8.12496	8.33526	8.26741	7.82184	7.19257	6.43856	5.88017	7.9089	8.28935	8.33526	8.29678	8.40128	8.39116	8.19951	8.59801	8.47557	8.53489	8.97841	9.52133	8.93026	9.77525	8.93244
APC	5.84781	4.38103	5.60036	6.84465	1.99693	3.59724	2.23358	10.3741	5.66875	8.84672	3.72253	6.26629	2.4946	6.85011	1.56963	-2.4017	-3.9058	3.49046	-0.692599	1.75244	2.93621	1.37585	2.09463	-5.06335	5.10611	5.05935	5.10534	5.15652	4.98646	5.00911	5.00999	5.35767	5.17224	5.18847	5.04197	5.101	4.9927	5.11949	4.97957	4.85062	4.79019	5.02718	4.89391	4.96742	5.02852	4.9664	4.99759	4.76721
APC2	13.1474	-0.103527	1.85828	2.07391	5.77122	1.81935	2.69296	1.06267	4.25751	1.16653	1.00911	1.43988	2.10962	1.14644	1.01794	1.64719	6.80379	0.759388	7.05205	2.5433	-2.09501	-1.05628	-3.79887	-1.83488	5.322	4.91834	4.98684	4.99984	5.09739	4.96607	5.02564	4.9796	5.1039	4.95655	4.95799	4.96065	4.98091	4.94893	4.96326	4.97722	5.12098	4.94208	5.12841	4.99417	4.86597	4.8922	4.80559	4.8668
APCDD1	-2.08871	-3.94513	2.27143	1.7734	-2.11704	-2.86844	0.923142	0.64234	2.47223	2.84085	0.95752	1.32682	-0.933138	0.957829	3.25559	8.14641	-5.77196	8.18336	1.15507	7.23243	2.61768	-0.155304	0.485838	11.6054	4.83904	4.7947	4.99998	4.98989	4.85743	4.84804	4.96431	4.96282	5.02508	5.00742	4.95629	4.95733	4.88645	4.9436	5.03157	5.15951	4.73318	5.16531	4.95262	5.15406	5.01758	4.91996	4.94514	5.27483
APCDD1L	108.517	122.417	129.871	122.407	105.358	94.7753	47.0712	35.7164	30.2258	167.288	161.689	71.3557	63.4966	61.3762	74.6871	68.1863	102.662	114.098	130.765	117.374	52.1329	96.907	47.5348	90.3637	6.8272	6.9722	7.10123	7.06458	6.76854	6.37087	6.26791	6.214	6.24528	7.35211	7.31622	6.32963	6.2313	6.21589	6.45755	6.28851	6.75767	6.93512	7.08218	7.34955	6.34056	6.80866	6.36593	6.73958
APCS	-0.845898	2.56815	9.21564	6.23046	2.32179	3.28467	-1.53243	1.85512	4.65399	-0.860833	7.6514	-4.76814	0.369169	-2.08489	-0.526939	-0.399985	-1.82118	3.10015	-0.0501123	1.44317	-1.2667	3.62418	3.26633	-6.65166	4.88237	5.00325	5.2193	5.1347	4.99613	5.00123	4.87806	5.01019	5.12144	4.89618	5.15951	4.76191	4.92629	4.84307	4.91667	4.91428	4.86284	5.01419	4.91451	4.95648	4.8924	5.0393	5.0402	4.72018
APEH	1113.59	1014.48	1008.88	968.043	1018.33	1205.22	552.17	365.631	300.78	1056.64	1020.86	760.704	767.835	787.89	758.14	710.362	765.02	771.707	846.937	629.247	705.681	1145.86	589.291	934.64	9.86184	9.72756	9.703	9.7472	9.71306	9.66219	9.30069	9.00076	8.91882	9.79794	9.76369	9.44926	9.43039	9.51473	9.53501	9.42484	9.52542	9.55733	9.69707	9.70454	9.74383	10.2225	9.70541	9.80013
APEX1	1700.37	1682.66	1757.47	1573.96	1594.76	1726.78	702.542	358.074	279.401	1534.87	1580.66	1010.85	959.065	993.329	925.749	891.934	928.236	922.392	996.124	801.237	917.876	1317.07	749.207	1270.86	10.4626	10.4612	10.4975	10.4679	10.3709	10.1415	9.65062	8.97368	8.83037	10.3266	10.3965	9.85658	9.7472	9.83778	9.8338	9.78321	9.82837	9.81955	9.94428	10.083	10.0909	10.439	10.039	10.2207
APEX2	661.221	730.289	789.434	656.167	711.545	653.147	298.66	139.053	100.475	572.712	646.727	380.749	399.472	377.567	362.449	354.051	324.273	345.797	374.096	306.952	267.214	466.225	221.16	421.143	9.13883	9.28598	9.36795	9.23999	9.22293	8.7589	8.49054	7.76989	7.60134	8.9683	9.13163	8.44275	8.48965	8.45896	8.47223	8.38691	8.29337	8.42487	8.52895	8.67798	8.38769	8.89961	8.33216	8.72107
APH1A	623.027	602.739	627.738	530.748	568.364	844.233	481.778	335.095	263.15	577.845	592.971	733.104	665.353	604.039	656.912	586.593	680.126	667.107	591.523	469.549	388.944	491.281	302.063	536.273	9.05423	9.02925	9.06549	8.94549	8.92481	9.14205	9.11933	8.88963	8.76152	8.98451	9.00711	9.38482	9.22543	9.11878	9.32392	9.11007	9.36189	9.35832	9.16619	9.28672	8.91743	8.97022	8.76769	9.03502
APH1B	30.6355	58.3466	57.9968	38.3312	40.9456	57.2564	53.769	55.9607	39.7294	32.5008	59.2842	161.129	124.438	124.105	85.1997	80.7361	108.76	124.387	116.132	54.4836	84.704	46.308	75.7175	98.5992	5.74094	6.24909	6.29564	5.96866	5.93238	5.95606	6.38885	6.64741	6.50784	5.76616	6.24008	7.27385	6.92804	6.94923	6.59201	6.45956	6.82565	7.05064	6.92983	6.42907	6.8631	6.08856	6.87979	6.83042
API5	505.412	437.974	396.102	394.253	448.219	486.695	247.471	182.625	135.481	434.169	386.779	330.079	352.488	345.307	330.401	372.75	363.117	364.678	299.077	202.275	191.447	300.573	144.624	301.561	8.77837	8.60308	8.48451	8.55345	8.60308	8.38691	8.24999	8.1033	7.94825	8.60548	8.45632	8.25106	8.32881	8.34633	8.34976	8.45632	8.46509	8.49632	8.20343	8.09461	7.95747	8.29628	7.75674	8.27959
APIP	79.5484	84.7596	88.547	67.7762	62.726	105.845	32.7751	12.8131	33.8238	100.414	65.8987	64.7028	69.4255	52.4226	55.6771	65.6153	75.2927	59.6304	53.9806	33.5683	36.0615	47.1035	20.2342	51.6827	6.51346	6.58785	6.66522	6.45148	6.26478	6.47353	5.97775	5.46388	6.35497	6.7344	6.32658	6.25151	6.30609	6.07004	6.19358	6.25388	6.42621	6.25976	6.13989	5.97447	6.02252	6.10598	5.65262	6.19445
APITD1	75.5946	91.83	101.994	76.1295	81.4879	88.1745	39.7067	20.0475	23.8637	96.0992	90.1251	92.767	96.6187	79.0368	73.7241	86.0931	74.6597	77.94	70.7883	37.4236	34.6705	58.1565	25.4537	46.4216	6.46671	6.65851	6.80761	6.55475	6.50693	6.3049	6.12771	5.74299	6.05467	6.6872	6.63754	6.60114	6.64031	6.45263	6.44732	6.51711	6.41549	6.50961	6.39164	6.0745	5.98998	6.29168	5.81717	6.10024
APLF	2.12073	3.02132	0.308483	0.803426	0.727689	5.31761	3.0212	-1.18005	2.44686	1.32554	10.8747	0.367109	-0.461466	6.43368	2.21265	3.1563	8.24499	9.7516	2.54122	0.391261	0.126056	2.81443	-0.116926	5.99381	4.98333	5.01686	4.93564	4.9591	4.94849	5.0469	5.03636	4.8924	5.02422	4.96099	5.25212	4.92674	4.90218	5.10884	4.99892	5.02186	5.16399	5.21347	4.99738	4.92046	4.93732	5.01255	4.92483	5.1066
APLN	7.58845	11.2612	8.09878	5.00398	6.68615	13.1086	0.427887	3.83319	2.61127	6.91546	5.3619	4.1371	5.65121	-0.364613	5.64926	6.29324	5.66152	4.91439	5.37434	6.66731	2.82923	8.61015	0.788824	8.76024	5.15995	5.26758	5.18138	5.09572	5.12301	5.21325	4.94696	5.0853	5.03053	5.13033	5.08963	5.04056	5.08815	4.90016	5.10315	5.10805	5.08906	5.07107	5.08274	5.13578	5.02453	5.19312	4.95487	5.18861
APLNR	2.34031	-1.83249	-1.07114	-4.47378	1.41778	-3.76003	1.75461	-1.29395	-4.96148	-1.48099	-1.1264	-7.23182	0.681791	-5.85059	-8.02567	-2.81264	-0.347176	-2.43595	-4.15103	-2.49344	0.484211	-5.33907	-1.14844	2.66036	4.99009	4.8628	4.89152	4.7886	4.96902	4.82356	4.99336	4.88812	4.73572	4.87743	4.89466	4.67947	4.93681	4.72273	4.67417	4.83742	4.90807	4.83876	4.78357	4.82369	4.94901	4.76046	4.89178	5.0053
APLP1	7.55843	6.08091	4.60025	2.75354	1.15823	7.74861	0.99876	-0.374567	5.77902	4.09722	5.37334	11.8174	7.80971	6.04604	3.04493	5.76373	5.23348	3.20064	6.93197	1.94268	5.42144	2.55438	8.74415	6.20301	5.15896	5.11311	5.0742	5.02174	4.96127	5.10124	4.96636	4.92274	5.17954	5.04513	5.09008	5.24399	5.14516	5.09629	5.02543	5.09471	5.07687	5.01758	5.12505	4.97383	5.1116	5.0054	5.23819	5.112
APLP2	301.272	302.932	221.823	199.709	328.046	370.546	214.7	109.964	76.5153	248.749	251.418	325.592	349.388	348.425	304.941	245.902	253.293	224.667	262.606	186.758	319.723	272.603	289.406	391.531	8.11349	8.12586	7.75886	7.6894	8.20425	8.0278	8.0613	7.47139	7.26161	7.86884	7.8935	8.23093	8.31472	8.35662	8.25223	7.88052	7.95423	7.83416	8.03784	7.99312	8.63392	8.15694	8.70109	8.62068
APOA1	9.1203	7.16084	0.255348	3.12798	-0.389151	2.13952	0.535469	1.90499	2.24824	5.80542	1.78005	2.83335	5.46845	6.8927	-1.1402	-0.68833	6.59459	1.64258	9.5474	1.2172	15.7736	21.5701	18.1286	18.1075	5.20412	5.14608	4.93439	5.03305	4.91432	4.97415	4.95099	5.01195	5.0158	5.09791	4.98026	5.00186	5.08262	5.12114	4.89638	4.90542	5.11464	4.96935	5.19875	4.94774	5.46184	5.55825	5.57708	5.4669
APOA1BP	1350.13	1353	1463.63	1288.92	1267.61	1476.38	636.139	487.071	483.267	1183.46	1167.37	1165.25	1198.2	1061.62	1112.97	935.046	987.674	1097.66	1012.69	686.778	738.305	847.915	601.96	1157.67	10.1198	10.1457	10.2207	10.1752	10.0213	9.92645	9.49963	9.38254	9.47074	9.98295	9.9594	10.0742	10.0677	9.96094	10.0973	9.84685	9.92377	10.0987	9.97711	9.84026	9.81074	9.76101	9.73866	10.0959
APOA2	-2.25415	-3.62742	-0.199013	1.23906	-4.83406	-1.12928	-0.476127	-0.669252	0.922209	-4.73834	-2.6627	-0.677824	-2.11961	0.163983	2.01886	-5.40497	-0.156364	-2.78112	1.08208	-2.90637	-3.77681	-5.4501	-0.72233	-0.577812	4.83307	4.80529	4.92004	4.97307	4.77264	4.89131	4.91619	4.911	4.9636	4.77857	4.84753	4.89479	4.84892	4.91682	4.99292	4.75601	4.91404	4.82633	4.95057	4.80954	4.81135	4.75748	4.9059	4.90731
APOA4	1.04934	-0.911198	2.40323	7.78725	0.285089	-5.44627	2.72522	-1.77371	-1.6854	-4.07137	-0.747986	0.715143	0.553228	2.36988	-1.83467	0.762033	-1.96253	-2.66812	-6.24826	-6.74008	3.27972	-3.94702	-0.297823	-0.964546	4.94821	4.8924	5.00441	5.18465	4.93488	4.77738	5.02659	4.87011	4.85948	4.79881	4.90584	4.93811	4.93244	4.98604	4.87407	4.94986	4.85837	4.83042	4.71334	4.67654	5.0394	4.80377	4.91881	4.8952
APOA5	8.14742	5.91359	-0.155327	-5.35605	-3.38902	8.23231	4.46093	-2.59952	4.35774	12.5374	-1.0872	-1.46853	0.997007	-1.07573	5.50861	-0.922904	8.24567	3.32312	4.8632	2.41988	1.58355	6.95967	7.10879	-3.82737	5.1757	5.10666	4.9215	4.75985	4.81806	5.11234	5.08703	4.83925	5.10828	5.29555	4.89627	4.86979	4.94668	4.87711	5.09921	4.89798	5.16412	5.02183	5.06819	4.99011	4.98502	5.14472	5.17408	4.80712
APOB	-1.32197	-3.35201	-4.25231	0.963144	-7.83338	1.20141	-2.84808	-1.77741	-4.84429	-4.53958	-1.85364	-1.19106	2.28505	-6.13401	-2.22814	-3.49508	-1.08392	-2.78407	-5.81261	-2.24206	-3.41139	-3.41589	-7.6557	-6.70592	4.86476	4.81366	4.78819	4.96404	4.68085	4.95045	4.83291	4.86996	4.73917	4.7848	4.87245	4.87878	4.98646	4.71308	4.86291	4.81462	4.88611	4.82627	4.72637	4.83261	4.82251	4.8193	4.67162	4.71888
APOB48R	3.28308	0.353077	8.27686	2.64143	2.84522	-0.122769	-0.366073	-3.46455	0.0149821	6.74383	2.4134	-1.33165	4.9925	0.343128	-8.95243	0.814027	2.00153	-0.579998	-3.09522	-0.494023	-3.88884	-0.61068	2.95972	6.78332	5.02122	4.93365	5.1878	5.01872	5.01305	4.91808	4.92049	4.8085	4.92785	5.12505	5.00085	4.87447	5.06838	4.92323	4.64874	4.95187	4.98277	4.89735	4.81582	4.89164	4.80737	4.9059	5.02955	5.131
APOBEC1	2.77503	0.809979	5.53752	5.9783	3.38586	6.64153	2.10435	0.765013	1.66034	-0.854897	3.18229	3.87367	4.08568	-0.78162	-0.570404	5.3618	3.17749	1.88665	0.399297	1.12743	1.17063	-1.01331	-8.20126	3.16903	5.0043	4.94813	5.10315	5.12631	5.02935	5.07639	5.005	4.96788	4.99119	4.89645	5.02395	5.03301	5.0418	4.88636	4.91496	5.08355	5.01701	4.97656	4.92882	4.94495	4.97223	4.89348	4.65418	5.02199
APOBEC2	-4.82084	-4.73272	1.09167	2.68275	-5.4469	-5.95219	-0.414688	-7.8489	-3.77542	-7.21983	2.21035	-0.946203	2.35476	-1.66755	-2.59553	-3.19955	-3.70627	-0.930019	1.72877	-0.624127	-2.58967	-2.67963	-3.46394	-0.213249	4.74691	4.76857	4.96136	5.02032	4.7529	4.76291	4.91834	4.64938	4.78152	4.70008	4.99372	4.88681	4.98829	4.85656	4.85115	4.82527	4.79675	4.8867	4.97089	4.88766	4.85021	4.84161	4.81744	4.91897
APOBEC3A	2.80829	2.10777	3.75073	-0.0521303	2.7114	7.82943	4.1127	6.49987	0.504042	2.34798	-0.252518	-2.08943	1.86684	-4.22817	-1.5003	-0.879493	-2.00983	-0.38306	-2.96086	-5.53353	-2.18322	1.45447	2.1368	-0.750969	5.00535	4.98863	5.04651	4.93284	5.00885	5.10315	5.0742	5.19041	4.94755	4.99107	4.92014	4.84922	4.97312	4.77533	4.88517	4.89935	4.85671	4.90406	4.82031	4.71653	4.86348	4.96942	4.99903	4.90262
APOBEC3B	67.6209	71.9163	84.3961	65.9507	81.1412	161.318	100.804	80.8387	70.7493	70.7594	112.869	173.778	160.778	142.576	128.747	125.681	131.83	129.926	138.882	53.4699	85.9962	84.1453	66.3939	122.35	6.36685	6.43973	6.61566	6.43079	6.50305	6.92753	7.08839	7.05433	7.16509	6.39657	6.87444	7.37357	7.26096	7.11572	7.08562	6.95791	7.05647	7.1105	7.15902	6.41096	6.88347	6.66096	6.71878	7.10077
APOBEC3C	58.4519	47.9486	59.2813	55.3728	53.47	49.8853	36.0338	20.1459	16.2789	61.6881	51.7129	60.4614	60.6219	64.4395	64.4527	57.1899	79.6553	54.3407	43.8601	57.4369	57.5089	58.5781	46.059	74.7496	6.23762	6.08665	6.31262	6.27532	6.1417	5.85302	6.0504	5.748	5.73707	6.27025	6.12699	6.18831	6.18657	6.25938	6.32697	6.12699	6.48408	6.1739	5.97255	6.48144	6.43571	6.29646	6.33218	6.54151
APOBEC3D	8.43878	3.17226	7.59693	6.05986	1.90365	4.15268	2.82566	7.23756	5.19578	3.4716	6.90236	18.1236	19.7935	20.4709	30.5118	17.5684	13.8213	16.4958	14.4816	18.3645	23.8974	10.6802	14.877	14.8127	5.18385	5.02067	5.16701	5.12874	4.98329	5.02146	5.0303	5.22444	5.1468	5.02722	5.13712	5.39263	5.44434	5.46127	5.73068	5.38924	5.30899	5.39294	5.32775	5.53792	5.7082	5.25772	5.45451	5.37678
APOBEC3F	48.6725	44.9506	54.2264	40.586	36.9788	49.1328	27.973	14.6402	12.5849	34.4308	42.2206	39.0498	35.1132	35.5156	31.0551	36.7343	36.5941	34.9612	42.0636	36.83	41.4421	47.1339	27.5793	47.7021	6.09237	6.0317	6.24008	6.01133	5.86381	5.84399	5.85928	5.54754	5.55801	5.811	5.97155	5.82823	5.76787	5.7791	5.74121	5.79552	5.81852	5.81566	5.94058	6.05891	6.13287	6.10755	5.88017	6.12737
APOBEC3G	27.7265	33.8966	28.8676	25.2127	21.656	22.5639	12.8488	10.4248	8.42871	28.0459	25.9582	39.06	38.1195	47.3485	28.2966	36.3135	28.0872	32.3988	29.2105	25.8402	42.1042	33.7356	28.025	49.0046	5.68284	5.81788	5.74547	5.67936	5.5227	5.40263	5.38924	5.35888	5.33031	5.6742	5.63999	5.82866	5.82233	5.99219	5.6792	5.79014	5.64271	5.76183	5.68148	5.77516	6.1458	5.84372	5.89496	6.14903
APOBEC3H	-2.90047	7.70305	1.27176	3.00443	-0.713477	12.8262	-1.54458	-3.68362	-2.96668	-0.163758	6.67281	12.6016	6.453	4.84326	0.920609	1.15338	5.54662	4.55841	4.54236	3.26226	1.42514	2.20721	1.41469	1.469	4.81269	5.16367	4.96799	5.02907	4.90273	5.20525	4.87758	4.79911	4.81111	4.91707	5.13039	5.26351	5.10985	5.06121	4.96022	4.96265	5.086	5.06039	5.05878	5.01833	4.97998	4.99453	4.9754	4.96939
APOBEC4	1.30558	-3.96241	-13.0006	-6.69035	5.40566	-6.58391	-6.20541	-2.6433	2.97085	2.3277	0.717751	-2.75873	-2.84178	-1.57158	0.895653	-2.89046	-5.43695	-2.3276	2.46063	-1.06968	-1.77285	-6.12432	-3.464	-0.999519	4.95729	4.79378	4.52389	4.72032	5.08586	4.74455	4.71653	4.83763	5.04531	4.99048	4.94969	4.82869	4.82549	4.85982	4.95926	4.83567	4.74339	4.8421	4.995	4.87245	4.87582	4.73508	4.8174	4.89398
APOC1	22.5488	16.2423	19.465	16.7677	21.1719	14.6494	7.65161	7.81077	8.62221	16.0827	19.5504	21.812	22.5279	15.7794	6.04466	23.8725	13.5233	21.8132	23.1453	13.4748	12.8964	12.1985	20.7973	15.9208	5.55764	5.40713	5.51716	5.46236	5.51076	5.24329	5.20101	5.24808	5.34106	5.38738	5.48445	5.48493	5.50788	5.35311	5.11534	5.52548	5.30183	5.52137	5.54438	5.3735	5.36694	5.30253	5.66949	5.40669
APOC2	0.383045	6.72755	-0.251946	4.60126	-0.45188	0.0983995	-0.366333	5.0638	8.40626	0.411247	4.36916	2.02973	3.0674	-2.29285	1.43374	3.52557	-2.14014	-1.13909	1.22719	5.98181	0.636135	3.1241	-1.66701	-0.455757	4.92479	5.13219	4.91793	5.08218	4.91228	4.92344	4.92046	5.1343	5.32912	4.93395	5.06095	4.97873	5.01093	4.83655	4.97559	5.03257	4.85207	4.88021	4.95499	5.11058	4.95403	5.02242	4.87538	4.91124
APOC3	2.98778	2.07235	0.265602	-1.94638	-6.06872	0.265033	3.01399	-2.36723	2.59871	-0.720886	11.2241	3.52729	-5.3758	2.69119	-4.05107	-2.74403	2.02023	-1.86223	-2.84745	8.45155	-0.0971338	4.28292	-0.41694	-1.01321	5.01131	4.98787	4.93455	4.87186	4.73494	4.9276	5.03607	4.84759	5.02998	4.90055	5.26338	5.02163	4.74115	4.99613	4.80634	4.84011	4.98338	4.85684	4.82425	5.1944	4.93036	5.05913	4.9146	4.89384
APOC4	1.45719	-1.22012	1.14984	2.92067	-0.076758	1.40527	0.167793	3.74682	5.34569	0.773552	9.32064	2.26184	-1.3975	2.45565	-2.03413	-1.0086	0.204399	2.7405	0.513036	2.21968	1.33413	0.594642	2.98748	-1.24078	4.962	4.88288	4.96389	5.02661	4.92374	4.95578	4.9386	5.0823	5.15435	4.94589	5.20886	4.98589	4.87174	4.98837	4.86888	4.89505	4.92513	5.00246	4.9323	4.98281	4.97703	4.94287	5.03038	4.88636
APOD	22.0109	17.2422	13.0135	11.7635	14.9582	16.7727	16.4311	4.98324	8.09705	14.528	2.92983	7.50289	2.70075	5.19498	-0.831527	0.613252	-0.472443	2.63121	-2.10581	0.961947	-6.74894	3.40551	-1.89153	3.72149	5.5467	5.4331	5.33326	5.3112	5.35454	5.28674	5.51647	5.13	5.31071	5.35062	5.01647	5.13798	4.99954	5.07182	4.90657	4.94499	4.90427	4.9987	4.84846	4.93939	4.71888	5.03175	4.8675	5.03849
APOE	5.54454	0.164928	3.0141	1.87266	2.43094	6.99854	0.383415	2.82732	13.3881	8.76659	-3.11363	0.315157	3.78946	2.28205	-7.95997	5.56298	5.09096	8.77994	3.69311	-0.97405	-2.36742	-0.250336	0.735991	4.69516	5.09624	4.92699	5.02293	4.99313	4.99984	5.08348	4.94565	5.04725	5.59502	5.18676	4.83323	4.92495	5.03265	4.98378	4.67681	5.08951	5.07284	5.1833	5.03175	4.87568	4.85721	4.91741	4.95293	5.0666
APOF	15.7499	16.4183	20.5676	13.6003	21.6605	41.6077	23.8222	19.7096	21.4565	29.4515	18.2967	21.9889	30.3878	36.9813	39.4529	34.5574	23.7154	41.0263	40.2943	44.5234	38.4098	34.969	44.0899	27.8507	5.39408	5.41267	5.55272	5.37124	5.52299	5.72896	5.74726	5.73122	5.96011	5.7037	5.4505	5.4875	5.67211	5.80619	5.90473	5.75481	5.54907	5.9338	5.9086	6.22346	6.06796	5.86943	6.28986	5.72195
APOH	-3.54747	-7.81617	0.865547	-6.00625	-5.95382	-4.30978	-3.08939	-7.87058	-6.73203	3.56788	-6.00095	1.72532	0.413488	-5.09186	-5.84486	-5.08645	-1.51931	-2.58023	-5.5038	-6.27772	-6.74256	-2.79544	-10.0765	-6.86581	4.78904	4.67356	4.95314	4.74192	4.73852	4.80899	4.82502	4.64836	4.67546	5.02988	4.74126	4.96939	4.92782	4.74905	4.7487	4.76472	4.87352	4.83354	4.73925	4.69304	4.71904	4.83883	4.57945	4.71334
APOL1	0.469509	0.974972	0.311908	0.972043	-1.99636	3.37642	-3.09873	-0.648572	-0.221743	-2.70296	-0.582111	2.08049	1.049	-0.809338	-0.927398	1.54779	-2.16656	-0.541954	6.45228	-0.583974	3.64778	-1.14685	1.80533	2.96933	4.92776	4.95403	4.93567	4.96414	4.86139	5.00369	4.82473	4.91172	4.91812	4.83946	4.91019	4.98014	4.94831	4.88514	4.90325	4.97452	4.85109	4.8987	5.11415	4.88878	5.05134	4.88949	4.98817	5.01573
APOL2	10.7668	10.5598	9.91035	8.52993	5.95653	18.6617	3.25935	3.14071	-0.616358	8.47816	10.1385	28.5859	18.5076	20.353	21.7931	14.0701	16.4295	20.0687	22.6967	15.2755	21.3169	14.538	25.591	10.2407	5.25226	5.24858	5.241	5.20877	5.10273	5.3252	5.04466	5.05878	4.90352	5.17967	5.23353	5.62609	5.41631	5.45944	5.52606	5.30294	5.37336	5.47941	5.53436	5.43204	5.63241	5.36917	5.82047	5.2339
APOL3	6.8113	0.19597	4.21206	1.08807	6.61121	6.91567	3.30843	0.586847	-2.39347	4.15873	5.77755	13.9578	10.8877	9.56628	10.779	13.58	12.4964	9.93239	11.1525	12.7007	12.8339	9.05431	15.0789	6.94106	5.13651	4.9278	5.06149	4.96811	5.12056	5.08161	5.04595	4.96058	4.83371	5.04699	5.10215	5.2978	5.22763	5.19312	5.2469	5.29119	5.27241	5.21885	5.24495	5.35062	5.36371	5.20569	5.46329	5.13578
APOL4	2.11609	2.12263	0.0807989	0.279661	0.341436	1.8218	8.98471	0.409857	3.79892	4.11615	7.29442	3.02752	4.40451	0.33115	2.40714	1.43883	8.22296	4.01367	0.282426	-0.939893	6.1561	2.17297	1.61874	1.45671	4.98322	4.989	4.92933	4.94274	4.9365	4.96616	5.24844	4.95419	5.08287	5.04559	5.14939	5.00716	5.05129	4.92278	5.00486	4.97153	5.16346	5.04379	4.92474	4.87698	5.13712	4.99321	4.98225	4.96915
APOL5	0.611171	1.44454	-1.88448	-3.57798	-4.7074	8.62284	1.82198	-1.67623	5.91511	-1.98212	2.71637	-2.4316	-0.373873	-2.7121	-3.41525	-2.8064	-2.01147	-0.39156	4.48761	3.20114	-1.31263	1.7684	1.88052	5.55766	4.93239	4.9673	4.86667	4.81815	4.77594	5.12007	4.99568	4.87338	5.18557	4.86205	5.01061	4.83891	4.90453	4.82153	4.82569	4.83793	4.85665	4.90368	5.05702	5.01647	4.89073	4.97952	4.99069	5.0946
APOL6	11.7137	11.5061	7.56016	13.0206	6.23131	9.455	6.1291	9.72301	5.35481	6.23601	11.4696	10.6773	9.46538	14.1468	13.5608	4.29646	13.0637	17.5257	8.57655	9.62603	12.3061	10.1886	18.6563	19.8927	5.27825	5.27662	5.16581	5.35226	5.11014	5.13798	5.14405	5.3293	5.1548	5.11014	5.27026	5.22014	5.18947	5.31229	5.32006	5.05388	5.28852	5.42259	5.17137	5.23316	5.34533	5.24292	5.59584	5.51647
APOLD1	53.3073	41.5038	32.3198	34.797	32.5829	47.2441	24.2983	0.059546	0.645628	27.8864	27.3515	40.5425	41.9475	43.8552	44.4824	56.3457	70.9705	54.6465	51.0426	18.325	20.6838	34.9337	15.1759	27.0913	6.16772	5.96838	5.82012	5.88906	5.76787	5.81566	5.76016	4.94021	4.95285	5.67006	5.66719	5.85281	5.89632	5.93727	6.00455	6.11709	6.36484	6.1782	6.09527	5.53617	5.61306	5.86859	5.4662	5.70113
APOM	13.7664	22.1782	25.5368	14.9989	14.0553	28.3887	11.1427	14.5492	11.2016	18.7121	21.0697	10.7924	10.3266	16.6528	9.81493	10.3644	9.23179	9.66804	20.111	10.2372	7.87327	13.2224	14.0795	9.72372	5.34106	5.55973	5.66799	5.41077	5.33131	5.50504	5.3252	5.54132	5.48567	5.45365	5.52578	5.22186	5.21155	5.37497	5.21978	5.21265	5.19255	5.21022	5.47612	5.25644	5.19933	5.3317	5.42431	5.21659
APOO	311.865	365.647	427.823	320.548	365.768	386.558	167.559	104.621	97.6783	389.38	311.398	285.64	289.013	247.667	216.194	191.56	210.203	247.829	242.007	192.648	159.435	224.826	143.067	242.071	8.15694	8.37495	8.57588	8.29483	8.34603	8.08224	7.75039	7.40517	7.56655	8.46158	8.16416	8.05954	8.05372	7.88555	7.78102	7.54156	7.70272	7.98854	7.9165	8.03834	7.72199	7.89048	7.74008	7.99154
APOOL	48.5909	51.7839	48.8686	52.0703	49.5087	69.7676	32.1048	58.6572	117.192	56.6912	48.88	43.3048	54.613	52.5785	41.7627	46.886	44.7074	53.0856	49.6995	31.874	36.916	55.3764	30.8313	29.6081	6.09062	6.14933	6.14737	6.22056	6.07053	6.09681	5.96366	6.69681	7.77196	6.19778	6.08045	5.90319	6.09458	6.07481	5.95194	5.96973	5.96366	6.14996	6.07415	5.93179	6.04044	6.24742	5.97303	5.7593
APP	609.2	587.464	471.32	442.576	602.239	668.632	592.479	373.896	386.25	565.42	563.573	557.994	525.707	455.714	347.002	415.481	570.831	428.279	487.902	375.869	543.709	529.628	448.804	667.266	9.02056	8.98692	8.69818	8.70194	9.00416	8.79541	9.39019	9.0356	9.21583	8.949	8.94754	9.00146	8.88072	8.71924	8.4083	8.61574	9.09549	8.71546	8.88838	8.96409	9.37358	9.09027	9.32295	9.32485
APPBP2	63.5437	52.816	57.5299	56.5647	42.2192	43.1126	32.7844	45.2228	19.4458	58.8854	56.3995	75.6868	76.0036	80.103	56.9504	80.5312	82.3472	72.2874	79.5555	45.4357	48.0331	45.6719	46.3002	43.0916	6.30877	6.16391	6.28954	6.29354	5.95194	5.75197	5.97863	6.4266	5.88535	6.23357	6.19503	6.38491	6.39461	6.46273	6.21309	6.45827	6.52005	6.42784	6.51346	6.24596	6.26591	6.07529	6.33906	6.03668
APPL1	51.2283	53.1369	43.6647	45.6832	48.8272	82.6457	42.3283	27.4056	30.4119	50.2862	47.6061	63.6529	52.5369	61.5718	61.4914	64.9419	66.3918	66.5539	58.8499	44.0757	37.4681	48.5076	28.8148	44.4218	6.13687	6.16919	6.05501	6.10707	6.06179	6.24774	6.17926	5.97681	6.25059	6.09743	6.05972	6.23762	6.06372	6.21846	6.28166	6.24334	6.29741	6.356	6.21696	6.21463	6.05063	6.13058	5.91382	6.06301
APPL2	182.371	180.589	170.298	148.843	191.584	190.416	112.353	77.4793	46.5339	189.888	125.861	163.941	171.683	176.184	172.687	207.556	181.483	166.211	180.316	102.614	79.8135	149.925	84.1855	104.867	7.46419	7.48144	7.44366	7.30322	7.4995	7.13907	7.23551	7.00892	6.66034	7.51065	6.99592	7.29869	7.34792	7.41766	7.47396	7.64714	7.50687	7.43796	7.52598	7.17202	6.79378	7.36586	7.01856	6.90423
APRT	741.884	716.387	791.102	688.679	639.279	669.283	378.041	299.414	338.765	645.819	560.416	631.546	618.788	547.133	511.461	506.878	491.222	508.963	495.193	262.641	282.883	372.241	206.016	360.288	9.29815	9.26586	9.37151	9.29904	9.07729	8.79704	8.82296	8.76361	9.07729	9.14546	8.93888	9.16858	9.11534	8.98532	8.9683	8.90106	8.8762	8.95449	8.90888	8.45281	8.46209	8.58201	8.2373	8.51231
APTX	419.515	441.103	468.214	409.866	389.555	572.371	237.814	139.702	86.65	429.5	408.163	380.982	409.194	406.476	414.423	399.405	394.849	369.625	307.545	275.413	244.78	299.295	199.429	311.105	8.54826	8.61017	8.69197	8.61017	8.42919	8.60234	8.19115	7.77764	7.41766	8.59475	8.51559	8.44463	8.51987	8.56286	8.65419	8.55461	8.57766	8.51832	8.24942	8.51301	8.27057	8.28676	8.19797	8.32018
AQP1	8.57152	9.58474	10.3531	4.24219	5.48717	8.9812	1.95222	6.9952	5.38595	12.613	10.3468	9.50034	12.0935	4.5192	6.06573	8.34762	6.36652	8.50895	10.8329	14.5458	9.79854	15.1026	10.2003	9.935	5.1878	5.21965	5.25513	5.07076	5.08821	5.12739	5.00008	5.21314	5.15658	5.29744	5.23872	5.19019	5.26122	5.05214	5.11612	5.16468	5.1079	5.1746	5.23353	5.40896	5.26305	5.3868	5.29017	5.22425
AQP10	0.576435	8.54104	-2.67384	-0.558836	8.60971	0.654514	-6.7932	-2.75665	-2.58025	0.441978	3.44634	-2.26537	3.80213	0.827206	-4.11535	-1.81925	-1.36214	5.43296	4.13113	1.2635	3.84378	-1.863	2.30481	6.66188	4.93114	5.1896	4.84014	4.91511	5.1779	4.93741	4.69609	4.83297	4.82656	4.9346	5.03251	4.84386	5.03293	4.93862	4.804	4.86908	4.87823	5.08658	5.04519	4.94935	5.05731	4.86734	5.00478	5.12713
AQP11	38.6795	34.6419	49.1973	42.2115	40.9189	28.0926	28.8013	30.8128	25.1893	33.3043	40.5243	55.87	51.8759	50.9515	31.5724	29.3267	59.1101	43.3443	53.2649	37.4646	46.5572	45.6547	44.1597	102.11	5.90217	5.83108	6.1529	6.03846	5.93179	5.49997	5.87945	6.0731	6.09458	5.78554	5.94025	6.11796	6.05418	6.0439	5.75145	5.64271	6.19538	5.9758	6.12806	6.07529	6.23092	6.07415	6.29066	6.87173
AQP12A	3.22503	14.7014	4.04573	6.63085	6.75266	2.695	7.22406	-0.328805	4.03307	-0.47345	6.79292	13.1237	6.75258	7.95001	6.76079	10.363	4.88641	10.9297	6.59394	11.9334	4.44355	10.8268	6.41804	5.15347	5.01934	5.36799	5.05589	5.14886	5.12448	4.9875	5.18734	4.92457	5.09344	4.90771	5.13459	5.27536	5.11674	5.15035	5.13521	5.21256	5.0683	5.24678	5.11809	5.3162	5.077	5.2616	5.14805	5.08174
AQP12B	34.793	45.4017	68.4575	39.3551	36.3487	34.0849	18.6181	16.7253	27.4731	38.161	61.2488	20.6726	37.5604	28.9556	30.1969	22.7823	28.4578	22.6202	27.5838	15.072	16.0115	11.1827	15.2111	18.1104	5.83023	6.0411	6.4266	5.98707	5.84554	5.60796	5.59055	5.63388	6.16841	5.88906	6.27025	5.45737	5.81158	5.64416	5.72605	5.50208	5.64807	5.54207	5.65001	5.42431	5.47017	5.27146	5.46768	5.46768
AQP2	-5.50315	-3.56784	2.67313	-1.3787	2.01739	0.00424513	0.373764	-0.270464	-3.88177	2.13147	12.3593	4.31766	-1.03217	7.74206	2.298	-2.55287	-1.87627	4.07763	0.701543	2.03066	-0.93195	1.08444	-5.14693	-8.48599	4.72416	4.80712	5.01246	4.89027	4.98736	4.92089	4.9452	4.92683	4.77773	4.98434	5.29555	5.04584	4.88329	5.14503	5.00123	4.84608	4.86108	5.04549	4.93795	4.97725	4.90317	4.95658	4.75756	4.66422
AQP3	848.212	668.462	632.443	595.1	579.507	566.19	229.155	114.757	47.2772	530.54	198.983	34.3858	36.5322	44.6011	23.2614	26.5024	30.0628	36.1648	30.781	50.9806	172.471	90.9269	120.67	369.243	9.4779	9.16293	9.08047	9.09645	8.94674	8.58662	8.14355	7.52552	6.67788	8.87766	7.59004	5.74454	5.79198	5.94937	5.55875	5.57804	5.68663	5.84135	5.71926	6.35839	7.81746	6.74575	7.52115	8.54022
AQP4	-2.18327	-2.96481	-5.16003	-5.99889	-3.44826	-6.95267	-5.52747	0.512255	-1.13164	0.0528906	-3.79496	-2.75573	-5.18687	-4.30776	-4.91008	-1.08375	-1.96853	-1.0108	-2.94227	-1.52787	-5.01934	-4.92831	-6.47491	-0.28561	4.8358	4.8261	4.75954	4.74252	4.81615	4.73161	4.73884	4.95776	4.88246	4.92288	4.81001	4.82886	4.74812	4.77269	4.77836	4.89277	4.85801	4.88419	4.82118	4.85704	4.77295	4.77399	4.716	4.91679
AQP5	-2.90864	-1.76533	-2.76575	-4.45285	-4.27163	1.75675	-4.7224	-3.77935	-2.18417	-4.54607	-7.20521	-0.717093	-4.37242	-0.861355	-1.37218	-7.26461	2.16384	-3.64988	-0.108691	-3.56015	-5.03944	-2.98612	-4.04301	-5.86101	4.81242	4.86568	4.83742	4.7891	4.79026	4.96414	4.76612	4.79597	4.84161	4.78458	4.70256	4.89351	4.7779	4.88345	4.88909	4.69425	4.98694	4.79725	4.91259	4.78606	4.77237	4.83286	4.79664	4.74399
AQP6	0.75806	-5.98986	-5.53659	-6.62193	0.58719	-3.12235	-2.77169	-3.20957	-0.71802	-2.09723	1.89632	-2.946	-5.323	6.46382	-5.82411	-3.85624	-2.7764	-2.07022	-6.48188	-1.92359	-4.21856	-1.94366	-5.18746	-2.63803	4.93732	4.72841	4.74631	4.72226	4.9435	4.8405	4.83606	4.81703	4.89914	4.85854	4.98369	4.82161	4.74306	5.11002	4.74991	4.804	4.82954	4.85072	4.70716	4.84374	4.7966	4.86486	4.75642	4.84297
AQP7	0.0141405	11.8314	1.34853	-1.41503	-4.09263	8.84799	-0.404159	0.261969	3.37996	8.26257	16.117	1.91101	4.27311	1.91526	2.12606	4.25913	2.48665	3.08913	2.65881	3.70983	-0.308109	5.85109	5.05624	-0.909073	4.91207	5.28505	4.97056	4.88874	4.79613	5.12496	4.91872	4.94843	5.06359	5.17205	5.39706	4.97501	5.04749	4.97234	4.99587	5.05282	4.99691	5.01384	5.00054	5.03398	4.92378	5.10841	5.10236	4.89716
AQP7P1	8.279	9.098	11.4087	13.1224	8.36826	24.9673	12.063	7.9075	-1.15682	11.771	7.3139	16.0875	16.3733	15.1477	3.85968	7.45879	13.1676	18.1498	10.64	14.8084	13.3135	13.7086	20.6362	6.85717	5.17896	5.20549	5.2873	5.35617	5.17155	5.44763	5.36056	5.25328	4.88159	5.2735	5.15017	5.34828	5.36838	5.33771	5.04837	5.1397	5.29145	5.43919	5.22807	5.41717	5.38145	5.34606	5.6659	5.13305
AQP7P2	5.52451	7.12939	1.71787	4.03843	-2.80038	5.38057	2.61203	4.43546	4.15529	8.4502	6.78207	8.31532	1.7909	11.0718	6.59976	6.97467	-0.402504	2.1217	2.48059	7.04854	8.22611	6.58353	3.7381	6.7545	5.09577	5.14516	4.98204	5.06384	4.83701	5.04798	5.02342	5.10784	5.09916	5.17832	5.13441	5.15787	4.97035	5.23224	5.13108	5.12739	4.90634	4.98355	4.99543	5.1485	5.21155	5.13204	5.05707	5.13039
AQP8	-5.03529	-6.96113	1.83183	0.649225	-9.03297	-1.93078	-1.76414	7.87028	-0.175356	2.29376	2.80426	1.8525	-1.70899	3.96182	-1.08832	-0.228675	3.77127	1.33197	-0.95743	-2.75307	-1.44801	-2.95004	-3.09126	-1.32841	4.74039	4.6994	4.98607	4.95514	4.64245	4.87174	4.86917	5.251	4.92008	4.98946	5.01337	4.97286	4.8618	5.03515	4.89809	4.91925	5.03511	4.95997	4.8859	4.81514	4.88622	4.83417	4.82996	4.88386
AQP9	1.21273	-3.95141	0.340942	-1.1199	-1.87411	7.03015	-1.57121	-0.272554	2.02547	-6.70177	-1.53637	0.808313	-1.16345	-5.1389	-3.50426	-0.889243	-2.47082	-2.82605	-0.743121	-4.24814	-2.58645	-4.4349	-2.27022	-2.5966	4.95408	4.79458	4.93678	4.89794	4.86614	5.08446	4.87663	4.92668	5.00649	4.71526	4.88201	4.9406	4.87899	4.74737	4.82327	4.89903	4.84069	4.82516	4.89216	4.76234	4.85035	4.78892	4.85491	4.84432
AQR	201.251	190.817	188.341	192.115	215.494	264.625	177.584	152.108	79.797	194.883	179.936	196.417	196.581	188.576	156.538	179.698	199.3	163.902	175.954	139.8	165.822	210.511	116.724	200.154	7.59806	7.55155	7.56359	7.63531	7.65624	7.60659	7.82387	7.88179	7.31573	7.55694	7.44939	7.55078	7.54798	7.51276	7.3291	7.4499	7.62923	7.41171	7.48936	7.59774	7.76502	7.80707	7.47505	7.74253
AR	-0.702277	3.94981	2.33005	0.986843	0.217002	-1.57779	1.47336	-0.592856	0.784445	-3.17055	0.48069	-2.22548	1.67487	-5.47155	-2.10646	2.6996	0.513542	1.88492	0.535467	2.69054	-1.81039	0.826024	-1.36264	-1.441	4.88752	5.04595	5.00204	4.96481	4.93281	4.88065	4.98342	4.91404	4.95803	4.82534	4.94284	4.84538	4.96692	4.73435	4.86658	5.00781	4.93476	4.97653	4.93319	4.99925	4.87454	4.95003	4.88514	4.88043
ARAF	439.69	487.435	515.349	431.421	438.684	533.044	276.628	243.276	228.577	391.893	430.398	289.515	257.274	279.218	260.668	275.915	260.647	260.309	263.15	272.257	292.445	317.361	249.021	408.103	8.59753	8.74613	8.81968	8.67157	8.57522	8.50967	8.39173	8.49879	8.58446	8.47434	8.58394	8.07601	7.90269	8.05213	8.03218	8.04279	7.99442	8.05604	8.04168	8.49704	8.51301	8.3727	8.50193	8.68409
ARAP1	217.108	183.304	150.329	157.645	245.006	229.974	152.1	141.287	78.5696	194.04	186.996	234.226	244.904	320.147	309.798	322.996	244.822	264.176	280.702	233.501	281.694	264.89	259.762	200.711	7.7062	7.4995	7.28382	7.37859	7.81888	7.40243	7.63488	7.79208	7.29554	7.54895	7.50463	7.79533	7.83565	8.2373	8.26829	8.26172	7.90973	8.07463	8.13165	8.28676	8.45896	8.11897	8.55737	7.74505
ARAP2	12.4355	9.00907	14.2371	1.92722	17.7277	27.2252	16.7548	13.2949	11.3136	18.7975	9.56608	7.90708	10.3778	12.1864	11.7559	12.0977	7.67666	11.3617	15.1923	7.13759	7.06389	17.5061	8.07316	13.7371	5.29989	5.20287	5.36861	4.99491	5.42607	5.48594	5.52772	5.48824	5.49346	5.45589	5.21644	5.1483	5.21274	5.26021	5.27467	5.25644	5.14626	5.25842	5.34636	5.1512	5.1694	5.45386	5.2093	5.34369
ARAP3	350.619	355.45	298.894	319.531	390.671	301.487	201.071	159.077	95.6981	278.666	328.207	362.791	388.389	380.155	419.009	409.568	330.428	278.884	288.655	283.547	324.906	419.572	309.549	390.577	8.30511	8.33805	8.12749	8.28882	8.43397	7.76758	7.97398	7.94024	7.54221	8.00394	8.23881	8.38003	8.45589	8.46994	8.67447	8.59569	8.31659	8.13746	8.16172	8.55345	8.66044	8.7574	8.8106	8.61574
ARC	0.787158	6.00608	3.26643	4.75568	1.14606	12.451	14.138	100.454	1462.76	-5.04708	6.19103	13.6677	13.1552	6.39013	13.1597	13.2613	7.4932	15.3522	6.54293	9.29835	6.61903	3.14813	-3.68452	6.73184	4.93829	5.1103	5.03053	5.08759	4.96099	5.19875	5.43449	7.35025	10.7083	4.76842	5.11558	5.28952	5.29072	5.10726	5.3103	5.28339	5.14101	5.36446	5.11703	5.2218	5.15223	5.02347	4.80959	5.1296
ARCN1	1083.47	1049.57	974.495	909.76	913.868	1138.08	743.615	974.446	785.288	951.67	853.75	747.831	798.276	743.194	702.528	657.484	848.188	799.234	955.312	468.698	401.263	491.576	306.019	629.471	9.82388	9.79319	9.65343	9.67803	9.57316	9.56051	9.73446	10.2642	9.9866	9.64685	9.49739	9.41726	9.49379	9.43317	9.42588	9.29212	9.69308	9.60503	9.88001	9.28144	8.94974	8.97221	8.78809	9.25353
ARD1A	639.236	669.74	731.902	542.068	584.3	579.187	296.631	207.375	254.227	620.196	535.648	395.817	450.241	390.473	386.658	368.885	351.638	332.267	365.775	233.957	308.077	399.907	222.993	324.093	9.09027	9.16619	9.27206	8.97154	8.96409	8.61773	8.48398	8.26996	8.71792	9.08532	8.87672	8.50661	8.64377	8.50513	8.556	8.44338	8.4142	8.36632	8.48596	8.29011	8.58136	8.68409	8.34165	8.37367
ARD1B	0.3456	1.82795	-0.742615	-5.16051	-3.35515	1.79978	-1.89677	-3.84673	-1.82917	2.75049	-5.20155	-0.414793	4.66917	1.31392	-4.41296	-3.99133	-4.18486	-3.52723	-0.968813	0.237269	5.73732	-0.899933	-1.7918	-3.6283	4.92344	4.9802	4.90131	4.76721	4.8189	4.96532	4.8649	4.79359	4.85424	5.00427	4.76721	4.9027	5.05839	4.95444	4.79349	4.79982	4.7813	4.80158	4.88529	4.91543	5.12254	4.89692	4.87143	4.81339
AREG	4.40118	-3.96736	1.42553	-2.88621	-3.67206	0.825336	0.867294	-1.30631	-1.45081	-0.685929	-2.59606	-4.21902	-2.43424	-1.10142	-5.40552	-1.37594	6.89623	-4.40122	2.69064	-2.78748	-2.71896	-7.64954	-3.45769	-5.21995	5.05931	4.79349	4.9731	4.84037	4.80936	4.94117	4.96211	4.88766	4.86973	4.90176	4.84959	4.77879	4.8381	4.87617	4.76328	4.88333	5.12416	4.77354	5.00157	4.8138	4.84597	4.68673	4.81768	4.76282
ARF1	948.004	988.515	1131.52	927.949	1024.52	1149.72	791.773	834.932	1110.65	946.306	918.95	736.318	745.221	681.406	706.933	684.566	652.41	705.616	675.612	513.766	449.526	558.015	319.924	609.886	9.62617	9.69412	9.87046	9.70116	9.72063	9.58001	9.823	10.0805	10.3934	9.6393	9.60272	9.39489	9.381	9.29699	9.43317	9.36712	9.29304	9.43498	9.38166	9.4154	9.11007	9.16121	8.86068	9.20095
ARF3	450.167	327.696	432.344	299.438	273.962	338.187	152.466	80.5737	49.2127	355.836	415.543	268.264	291.041	223.641	319.744	228.095	224.082	259.055	343.364	215.421	188.127	238.689	131.902	212.109	8.62957	8.23186	8.58563	8.19386	7.96084	7.91046	7.63687	7.05003	6.71686	8.33035	8.53594	7.97514	8.06474	7.75187	8.30352	7.77664	7.77764	8.05096	8.39809	8.18347	7.93211	7.97439	7.63005	7.82229
ARF4	1240.26	1124.15	1229.28	1101.79	1050.96	1224.82	814.068	1093.94	937.361	1089.55	1100.75	917.639	1087.13	982.676	674.913	885.354	1004.99	1038.52	1201.89	865.301	428.957	596.45	325.499	624.713	10.0184	9.87341	9.98175	9.93377	9.77121	9.67885	9.86309	10.4119	10.1899	9.84576	9.86184	9.703	9.93067	9.82477	9.36513	9.77307	9.95095	10.0031	10.2501	10.1883	9.04524	9.26763	8.88666	9.23999
ARF5	733.691	679.317	720.834	639.415	668.815	781.508	443.628	305.598	285.892	616.749	497.948	629.158	642.187	600.795	728.307	598.57	529.911	595.843	525.085	320.718	359.901	422.695	246.961	417.922	9.27722	9.18412	9.25279	9.20263	9.13752	9.03855	9.01364	8.78809	8.86586	9.07571	8.78079	9.16121	9.16619	9.10939	9.48409	9.14546	8.98976	9.19537	8.98881	8.74388	8.81106	8.76542	8.48716	8.71373
ARF6	6.89829	28.1042	16.9486	12.2446	14.3117	27.826	19.9228	8.02353	12.3329	22.3572	22.2431	9.53185	16.874	8.71202	9.40465	14.4293	6.01373	10.3409	18.5722	9.63166	18.1303	6.36525	16.0938	13.0609	5.1397	5.69858	5.44452	5.32741	5.33907	5.4948	5.63214	5.25811	5.54562	5.54562	5.55624	5.19161	5.37866	5.16948	5.21011	5.3112	5.09867	5.23006	5.43961	5.23399	5.53524	5.12532	5.49916	5.32113
ARFGAP1	308.967	324.544	264.647	300.675	387.575	540.185	390.521	418.465	254.541	323.752	309.737	439.721	439.897	444.089	668.427	579.355	457.126	582.227	564.84	439.038	317.735	446.463	326.057	289.798	8.14592	8.21928	7.97944	8.20185	8.42388	8.52651	8.85607	9.18948	8.71924	8.20874	8.15746	8.65243	8.61079	8.68452	9.35275	9.09097	8.77253	9.14911	9.10044	9.18412	8.62628	8.83591	8.88838	8.22193
ARFGAP2	333.894	385.03	393.281	344.206	405.433	438.817	278.059	247.833	162.944	295.004	360.955	247.304	274.53	253.229	281.996	237.353	262.406	255.965	262.408	194.181	227.653	270.768	205.354	280.204	8.24194	8.4351	8.47355	8.38268	8.47434	8.24999	8.40007	8.53133	8.16979	8.08671	8.36503	7.86971	7.98633	7.92015	8.14709	7.83065	8.00454	8.03107	8.03674	8.04654	8.17461	8.14355	8.23301	8.17533
ARFGAP3	78.1911	86.5289	70.4658	67.729	86.9112	143.592	116.831	165.21	78.3546	90.2636	65.9536	117.921	134.248	99.4284	113.697	109.499	121.008	130.777	154.248	77.3513	73.9194	67.5524	64.0733	68.2735	6.49558	6.60559	6.45295	6.45083	6.57922	6.79685	7.28674	7.97988	7.29298	6.62435	6.32812	6.869	7.02555	6.69356	6.91592	6.78881	6.9455	7.12138	7.31231	6.81983	6.70326	6.42466	6.66998	6.45338
ARFGEF1	189.733	176.673	132.755	127.842	152.61	178.107	113.887	90.1632	66.4165	156.041	158.392	167.189	165.08	149.369	157.301	171.143	165.024	155.669	186.793	134.664	119.546	132.906	112.449	160.728	7.51758	7.45286	7.12646	7.12055	7.21606	7.05647	7.25089	7.19573	7.0808	7.26709	7.27784	7.32792	7.29298	7.18957	7.3372	7.37357	7.37461	7.34207	7.56765	7.54093	7.32194	7.19395	7.42988	7.44873
ARFGEF2	88.9894	76.1756	78.7883	87.7691	123.397	237.56	202.533	267.724	301.875	80.7445	85.6731	73.383	103.192	99.3136	95.4469	126.361	104.396	92.6637	96.1809	84.0627	66.965	84.232	58.8731	81.3763	6.62027	6.49205	6.55276	6.67955	6.9367	7.45113	7.98738	8.62254	8.92646	6.51867	6.58056	6.35895	6.71092	6.69176	6.72326	6.96328	6.77425	6.69356	6.71263	6.9266	6.59429	6.66243	6.58056	6.62877
ARFIP1	52.5619	70.6892	55.4352	61.0342	56.9495	82.4608	35.8061	31.1958	28.7937	52.6067	62.6974	48.5372	48.526	42.3299	43.7059	48.0146	45.3215	44.9756	44.5346	28.7905	26.2002	36.4632	25.1503	42.1047	6.15695	6.42278	6.26132	6.36179	6.18958	6.2445	6.04431	6.08275	6.20473	6.13537	6.28813	5.99743	6.0034	5.91428	5.98971	5.98707	5.9758	6.00839	5.98477	5.85183	5.77296	5.89463	5.80904	6.01781
ARFIP2	13.3916	18.0756	11.3781	6.77522	15.5561	15.7646	11.9282	28.8847	11.8178	15.6073	10.2021	16.191	7.36318	10.6399	13.9595	11.3975	21.1801	20.5735	11.0125	15.4064	20.8465	12.8756	18.9846	24.0597	5.32953	5.45386	5.28574	5.15377	5.371	5.26463	5.35454	6.02577	5.51985	5.37771	5.23571	5.352	5.1343	5.21978	5.33002	5.23976	5.49012	5.49301	5.23945	5.43664	5.61748	5.32186	5.60796	5.62498
ARFRP1	42.8757	26.5292	41.7561	33.802	21.8716	45.88	17.8953	4.30615	7.34273	25.3723	39.0433	18.2587	13.3175	23.0258	17.6974	16.112	24.1035	12.1124	21.7729	18.6887	16.9603	30.1675	26.564	28.949	5.98446	5.66375	6.01857	5.86777	5.52846	5.79467	5.56613	5.10289	5.26656	5.62192	5.90923	5.39782	5.29386	5.51767	5.42234	5.35226	5.55501	5.27965	5.51076	5.55139	5.49821	5.75841	5.84823	5.74547
ARG1	3.32299	-5.48733	-4.56627	-6.50469	2.4242	-3.51215	1.51433	-0.63492	-3.06874	4.42546	-0.0619276	-0.342672	0.375135	-2.86903	-0.687446	-2.24212	-0.713058	5.33011	-4.15666	-2.81655	-1.80146	4.72167	-2.89856	4.79668	5.02252	4.74559	4.77804	4.72596	4.99965	4.83069	4.98466	4.91226	4.80737	5.05425	4.92645	4.90494	4.92645	4.81579	4.9112	4.85561	4.89698	5.08362	4.78327	4.81275	4.87486	5.07333	4.83584	5.06972
ARG2	81.0821	88.9694	105.178	72.2925	79.0264	161.971	121.752	207.233	202.043	75.9155	56.9771	54.3782	59.3826	38.5076	38.8862	44.6736	37.3745	52.9782	33.5641	19.2967	18.4276	24.7619	9.78482	39.6456	6.53347	6.62692	6.84193	6.51003	6.47772	6.9324	7.34617	8.26658	8.4287	6.46061	6.20376	6.09108	6.16796	5.83631	5.89252	5.9379	5.83427	6.14702	5.77544	5.56755	5.54438	5.63409	5.27606	5.9701
ARGFX	-1.76794	-2.32256	-0.0299608	-5.31729	-4.32624	-6.35825	-3.69869	-1.92191	-2.64356	-0.427498	-6.01671	-0.451078	-9.42898	0.10072	-3.98318	-7.16127	-5.18079	-0.902134	2.56562	-1.78905	-4.7618	-9.54706	-0.438867	-4.60685	4.85038	4.84677	4.92586	4.76114	4.78897	4.75108	4.80433	4.86458	4.82389	4.90958	4.74051	4.90139	4.60748	4.91478	4.8085	4.69898	4.75167	4.88779	4.9979	4.84812	4.78152	4.62129	4.91432	4.78349
ARGFXP2	-0.77467	-5.11503	-3.93068	3.00266	-3.87892	-0.023358	2.58851	-1.97369	-4.35707	0.334747	-2.16317	6.91373	3.451	-0.129475	0.145234	-1.38074	4.62452	8.92127	4.1209	5.4416	0.28677	-4.26428	4.55808	0.59079	4.88521	4.75651	4.79876	5.02903	4.80273	4.92033	5.02225	4.86246	4.75731	4.9317	4.86267	5.12106	5.02199	4.90796	4.93664	4.88321	5.06074	5.18761	5.0447	5.09217	4.94259	4.79521	5.08426	4.94426
ARGLU1	1076.87	939.015	811.343	970.808	1110.73	1921.38	824.287	718.288	532.316	1095.91	1137.5	1007.12	1044.79	1078.82	851.528	887.204	1031.85	973.196	925.107	1169.85	1369	1703.3	1303.33	1264.33	9.80667	9.62977	9.40637	9.75771	9.84194	10.2996	9.88001	9.88765	9.58263	9.85751	9.91697	9.84576	9.86184	9.97711	9.7087	9.77946	9.98295	9.9088	9.82204	10.6273	10.6582	10.8315	10.8055	10.2097
ARHGAP1	971.77	1066.79	1062.2	943.233	929.928	811.176	386.006	207.981	133.223	897.675	1004.62	839.073	756.223	664.708	742.71	719.819	670.959	666.614	752.823	470.492	469.651	572.155	363.955	645.176	9.65919	9.80667	9.78078	9.71847	9.60197	9.08139	8.84638	8.27569	7.92624	9.57603	9.73725	9.59783	9.4055	9.25801	9.50774	9.4468	9.33852	9.35635	9.52342	9.29138	9.17438	9.19996	9.03502	9.27995
ARHGAP10	121.067	118.612	119.157	116.545	124.087	137.669	83.6198	59.066	40.5704	92.2787	96.4091	82.866	63.3651	73.8748	100.983	77.6498	64.9721	63.2852	64.7929	51.0346	34.9969	81.3925	38.9292	63.0885	6.94757	6.93512	6.9927	6.99996	6.94447	6.74337	6.85737	6.70599	6.53237	6.64815	6.70475	6.47089	6.22865	6.38491	6.79056	6.4219	6.27532	6.31457	6.3058	6.35985	5.99743	6.62496	6.1696	6.37177
ARHGAP11A	10.3173	10.1121	9.70442	10.6473	9.40047	6.76417	4.78633	1.11452	2.73008	12.62	13.7692	8.57899	9.14868	12.3353	10.487	17.3656	7.89613	8.30546	13.1798	6.51975	4.02389	13.7854	7.48522	10.1365	5.24014	5.23502	5.23381	5.27272	5.20333	5.07891	5.09886	4.98175	5.03511	5.2978	5.33245	5.16567	5.18128	5.26326	5.23989	5.3832	5.15314	5.16909	5.29465	5.1293	5.0637	5.34828	5.18734	5.23017
ARHGAP11B	36.9258	40.3215	29.6206	32.7181	46.5523	32.5197	15.1582	22.5482	14.5305	46.2689	93.407	50.8278	45.8464	47.1963	47.5082	69.2167	41.4176	45.3119	47.4251	43.4346	66.7331	90.3034	94.0234	56.4524	5.87149	5.9474	5.75762	5.84278	6.02376	5.58017	5.47378	5.82582	5.65224	6.03565	6.6755	6.03317	5.9609	5.98767	6.06	6.30681	5.91017	6.01419	6.03479	6.20143	6.58978	6.7399	7.17067	6.26999
ARHGAP12	80.6683	76.0283	70.9619	70.9673	83.7151	127.058	75.3198	70.2961	57.6248	75.101	63.3439	93.1591	90.2942	84.7377	70.3051	108.619	93.3387	77.6473	82.405	55.1014	35.4736	75.846	40.5968	49.0379	6.52799	6.49051	6.45865	6.49331	6.53721	6.65526	6.74113	6.89659	6.90423	6.44839	6.29432	6.60559	6.57156	6.51799	6.39951	6.78004	6.65012	6.50379	6.54438	6.44208	6.00915	6.54548	6.21053	6.15028
ARHGAP15	8.53189	8.04444	17.5067	15.9827	16.7181	24.3395	4.32042	8.79178	11.3613	1.32278	17.9106	12.8873	11.09	7.03784	12.0268	17.691	1.70209	8.67428	4.93403	9.33248	1.44393	7.07016	4.3027	5.48924	5.1866	5.17432	5.46047	5.4412	5.40011	5.43531	5.08186	5.29159	5.49605	4.96087	5.44045	5.2701	5.23461	5.12448	5.28172	5.39173	4.97286	5.18065	5.07007	5.22339	4.98039	5.14825	5.07596	5.09269
ARHGAP17	189.055	190.826	172.206	170.785	189.752	295.382	238.284	222.698	261.628	186.999	173.572	212.817	189.194	193.753	197.353	202.977	186.734	178.207	160.787	108.439	117.676	161.336	107.545	141.051	7.51241	7.5523	7.45713	7.4764	7.48758	7.74505	8.19434	8.36689	8.75169	7.49346	7.41128	7.66061	7.49283	7.5504	7.65842	7.62358	7.53244	7.52214	7.37357	7.24508	7.30119	7.47086	7.37192	7.2745
ARHGAP18	28.8455	17.6726	20.9678	28.2878	24.4345	24.908	17.1356	10.07	5.21303	24.7123	20.7518	14.5928	21.0424	19.346	13.4777	13.8198	21.9644	22.7276	16.3171	10.7864	13.9987	20.7295	14.057	18.0726	5.70422	5.44452	5.5633	5.74385	5.57926	5.44577	5.54084	5.34464	5.14791	5.60658	5.51575	5.31265	5.47353	5.43638	5.31859	5.29744	5.50772	5.54536	5.37809	5.27635	5.40173	5.53774	5.42313	5.46597
ARHGAP19	154.776	159.662	138.288	115.286	156.46	173.057	85.9864	135.551	74.9886	172.708	238.502	262.307	245.697	243.524	250.808	276.551	208.356	181.195	173.543	113.522	140.195	205.29	132.433	148.256	7.25598	7.32552	7.17622	6.98834	7.246	7.02264	6.89387	7.73708	7.23848	7.39	7.83462	7.94709	7.84067	7.866	7.98127	8.0477	7.6894	7.54619	7.46712	7.30997	7.53879	7.78192	7.63637	7.34525
ARHGAP20	1.53983	0.68903	2.56757	1.17713	3.12478	-3.28009	1.92577	11.9516	3.14301	-4.9508	0.289543	4.98215	3.53074	3.38014	2.10517	0.975953	-1.44714	-1.3769	0.752668	2.29225	-2.98472	9.50419	2.66415	1.48386	4.9644	4.94429	5.00914	4.97074	5.02111	4.8366	4.9992	5.42202	5.0533	4.77175	4.93747	5.06562	5.02422	5.01797	4.99525	4.95684	4.87582	4.87284	4.94001	4.98533	4.8367	5.21978	5.01862	4.96995
ARHGAP21	653.851	523.214	486.582	551.137	580.763	1080.97	717.651	571.853	501.235	584.909	471.761	620.554	673.755	791.919	652.599	821.292	778.663	703.715	820.482	411.933	512.394	589.981	475.977	460.183	9.12097	8.83976	8.74003	8.99653	8.95374	9.4728	9.67803	9.59704	9.51381	9.00146	8.71502	9.13883	9.2434	9.52024	9.31279	9.64503	9.5516	9.43039	9.64876	9.09473	9.29212	9.24829	9.40294	8.83506
ARHGAP22	224.139	230.679	251.983	236.417	263.141	177.938	69.4502	31.8776	30.3118	247.421	197.999	137.192	154.438	150.382	150.643	170.654	164.822	172.688	165.248	164.45	181.135	187.063	169.09	211.889	7.74293	7.78868	7.92015	7.90049	7.9089	7.05528	6.64781	6.10755	6.24742	7.86011	7.57955	7.05613	7.20749	7.20015	7.28256	7.36947	7.37246	7.48272	7.40832	7.83183	7.88285	7.66246	7.96865	7.8202
ARHGAP24	-1.38855	1.21846	0.996008	0.736257	0.607938	5.02381	0.748343	-1.35031	-0.303436	-1.22959	-2.57031	-0.870459	0.461784	-1.29989	0.861515	0.707629	1.16858	-3.83078	3.418	-0.816663	-2.33525	-0.0569959	-1.27661	-0.507683	4.86255	4.96116	4.95776	4.95751	4.94426	5.0403	4.95825	4.88572	4.91503	4.88524	4.85031	4.88892	4.92919	4.8688	4.9586	4.948	4.95578	4.7913	5.02364	4.88084	4.85814	4.9227	4.88771	4.90913
ARHGAP25	9.74221	9.29496	11.0942	3.04609	2.4465	7.79897	3.98395	3.06932	3.53355	4.52015	7.64572	9.63345	9.82491	5.09784	8.07695	8.39833	10.9667	14.0692	8.01984	7.21617	8.09235	10.2335	6.57891	8.0724	5.22239	5.21082	5.27696	5.03058	5.00023	5.10259	5.07027	5.05662	5.07035	5.05737	5.15913	5.19487	5.19886	5.0683	5.17194	5.16552	5.23286	5.33326	5.15499	5.15349	5.20767	5.24482	5.15435	5.1672
ARHGAP26	0.760791	-0.889538	1.23071	14.9081	9.12877	5.23636	-1.21492	-1.90767	9.42647	-1.71499	4.25017	9.73312	0.494817	0.781925	5.70692	7.00002	-0.655441	5.04472	6.48304	4.62912	0.152271	0.832679	3.04651	3.61947	4.9375	4.8931	4.96687	5.40872	5.19458	5.04539	4.88983	4.86503	5.38532	4.87004	5.057	5.19765	4.93029	4.93716	5.10462	5.12817	4.89908	5.07489	5.11534	5.06529	4.93811	4.95022	5.03251	5.03503
ARHGAP27	56.3042	56.8879	40.6002	59.0652	64.3644	90.1785	71.8024	87.7843	34.7077	60.7483	56.3236	89.3449	81.8243	89.7936	94.9277	97.1242	78.944	61.332	60.4545	47.4466	65.1267	70.2158	62.718	66.593	6.20804	6.22801	5.99538	6.3325	6.28497	6.3258	6.68461	7.16086	6.37362	6.25911	6.1939	6.55935	6.47195	6.57957	6.71745	6.6459	6.47464	6.28359	6.23832	6.29354	6.56379	6.46273	6.64903	6.43043
ARHGAP28	0.770473	-2.66707	-2.00674	-0.648133	-1.25971	-1.3718	-0.271347	-2.62172	0.807619	1.73152	-0.597898	-2.06352	0.254634	-3.95964	-3.24969	-3.13386	1.6316	1.70328	-1.31143	-0.828426	0.488575	-2.77983	-2.44298	-1.22643	4.93801	4.83528	4.86286	4.91267	4.8859	4.88532	4.9236	4.83876	4.95872	4.97282	4.90973	4.85043	4.92281	4.78383	4.83049	4.82696	4.97037	4.9707	4.87429	4.88035	4.94908	4.83917	4.8495	4.88693
ARHGAP29	10.4458	16.6154	11.0012	11.3085	3.79888	48.1484	21.1665	12.3226	8.60188	15.6861	6.22945	8.27149	5.60199	5.74661	8.1033	7.93077	7.1114	9.24942	11.1101	6.68624	0.0569953	6.21213	-6.97272	0.75235	5.24409	5.41773	5.27375	5.29509	5.03981	5.82967	5.67287	5.44067	5.33998	5.37926	5.11679	5.15714	5.08653	5.08771	5.17356	5.1537	5.13064	5.19788	5.24351	5.13644	4.93506	5.12043	4.69636	4.94927
ARHGAP30	20.0064	18.7192	24.6949	22.1313	20.5008	16.3858	11.7733	5.25305	4.65742	17.3775	20.2529	11.3835	12.0166	9.01125	10.6554	13.4995	17.2085	5.8519	11.8433	12.3623	20.0652	7.48443	23.8089	25.4225	5.49821	5.46991	5.65293	5.59631	5.49589	5.27825	5.34763	5.1427	5.12172	5.42109	5.50134	5.23328	5.25924	5.17722	5.24292	5.28937	5.3954	5.10028	5.26122	5.33591	5.59082	5.16229	5.77192	5.66139
ARHGAP4	10.1802	15.1737	4.63976	12.3603	13.7886	28.7154	12.9527	5.01196	0.900831	21.9163	12.8063	20.9834	28.3827	17.06	26.1909	22.5581	14.7931	19.3863	17.4936	22.5566	34.5761	18.288	38.1814	21.9605	5.2355	5.37966	5.07517	5.33094	5.32364	5.51101	5.39408	5.13163	4.96291	5.53346	5.30873	5.46479	5.63024	5.38532	5.63149	5.49632	5.33515	5.46564	5.41183	5.66897	5.98707	5.47662	6.1529	5.57273
ARHGAP5	10.5103	10.6569	12.4068	10.0603	8.19644	25.2085	15.43	19.1734	2.65471	6.85451	11.5391	9.31847	10.2516	13.2325	1.11977	9.43495	11.8767	10.9904	15.8735	8.6035	8.16986	8.72679	13.9981	7.12643	5.24566	5.25138	5.31657	5.25453	5.16812	5.45244	5.48445	5.71562	5.03262	5.12817	5.27284	5.18517	5.20917	5.28633	4.966	5.19013	5.25611	5.2478	5.36567	5.19953	5.20988	5.19639	5.41997	5.14096
ARHGAP6	0.592042	0.512367	-0.499855	1.83798	-0.265496	2.59757	-0.145853	0.111594	1.51606	0.931965	2.32165	2.86956	0.196455	-1.18651	-0.5419	-1.63518	3.70142	1.93231	1.20833	3.84883	1.05874	1.7136	0.45567	1.20667	4.9317	4.93856	4.91019	4.99213	4.91828	4.98545	4.92807	4.94205	4.98607	4.9506	4.99738	5.00271	4.92115	4.87236	4.91613	4.87568	5.03305	4.97774	4.95419	5.0392	4.96827	4.9779	4.94404	4.96246
ARHGAP8	14.1232	25.3227	18.2574	17.6157	21.6166	9.33392	7.73966	-0.844092	4.56948	13.7411	16.5101	12.478	10.9447	8.46288	6.01079	10.2573	9.40984	6.46504	5.36205	10.4705	13.0769	11.2493	8.2409	15.9051	5.34935	5.63363	5.48445	5.48474	5.52105	5.13545	5.20449	4.90421	5.1176	5.32912	5.40914	5.26021	5.22972	5.16346	5.11376	5.21022	5.19555	5.11804	5.0823	5.26631	5.37316	5.2736	5.21591	5.40619
ARHGAP9	5.97673	11.9427	-0.283844	-3.00647	1.22089	7.11938	-2.72097	1.91272	2.64483	-2.83075	1.38071	6.25885	3.74463	2.58966	1.71686	6.72289	7.88647	-0.501213	1.5196	1.79201	-2.79968	6.54138	-0.339567	-2.36378	5.11009	5.28905	4.91682	4.83644	4.96335	5.08658	4.83758	5.01237	5.03211	4.83541	4.96946	5.1007	5.03111	4.9928	4.984	5.11981	5.15268	4.90036	4.96422	4.96856	4.84271	5.13078	4.91754	4.85187
ARHGDIA	1255.22	1401.58	1394	1225.71	1280.75	1416.85	731.508	596.89	555.385	1195.98	1109.89	807.32	785.466	791.052	923.21	773.299	692.807	749.881	611.19	425.149	435.459	800.693	303.906	648.84	10.039	10.1945	10.1595	10.1014	10.0376	9.86724	9.7099	9.64604	9.62372	9.99218	9.87902	9.55081	9.45766	9.51699	9.83168	9.54503	9.37993	9.51569	9.22046	9.14673	9.06778	9.67969	8.77916	9.28598
ARHGDIB	411.439	449.532	479.018	445.218	397.428	448.517	213.91	139.352	128.733	455.336	533.013	305.735	321.172	297.982	264.315	315.882	276.916	239.042	280.166	285.334	342.695	482.906	251.975	490.424	8.51792	8.64165	8.71994	8.71022	8.4552	8.28534	8.05491	7.77437	7.89121	8.66543	8.86727	8.14192	8.20137	8.14804	8.05446	8.22591	8.08271	7.93173	8.12654	8.56721	8.74133	8.94549	8.51832	8.92217
ARHGDIG	-2.85992	-1.06372	-6.49786	-4.12607	-2.93959	-2.95659	-3.45406	-0.717935	-3.05868	-2.73403	-3.80833	-6.07921	0.72141	-2.61461	1.3306	-1.49004	-5.82832	-2.24588	-1.43446	-2.13347	-10.9619	-4.8166	-8.53227	-7.48205	4.8139	4.88743	4.71168	4.79993	4.83307	4.84569	4.81281	4.90898	4.80773	4.83832	4.80959	4.72002	4.93784	4.82488	4.97256	4.87961	4.73046	4.84478	4.87064	4.83617	4.58265	4.77701	4.64036	4.69472
ARHGEF1	62.7906	56.7302	51.402	57.986	73.4388	104.636	61.2311	69.4133	60.0735	59.2851	58.0113	95.397	79.0372	81.335	97.3457	79.4309	75.6601	85.0827	80.8285	53.6084	47.9697	76.6486	43.5936	43.1057	6.29847	6.2243	6.18998	6.31208	6.40881	6.46061	6.52184	6.87979	6.95544	6.23927	6.21919	6.62939	6.43663	6.47727	6.75119	6.44403	6.43317	6.60114	6.52464	6.41549	6.26321	6.55897	6.27877	6.03714
ARHGEF10	282.172	276.516	276.117	257.289	275.324	390.373	285.706	196.56	96.8913	263.611	244.046	266.743	316.615	238.616	232.437	287.921	243.289	245	290.828	209.071	168.566	244.654	164.644	215.694	8.02524	8.01556	8.03056	8.00021	7.96865	8.094	8.43325	8.19838	7.55642	7.94755	7.86011	7.96865	8.18347	7.83752	7.87888	8.10654	7.89699	7.97117	8.17162	8.13816	7.78327	8.01642	7.92944	7.84233
ARHGEF10L	8.08754	5.70654	13.1597	9.21342	5.36558	14.1593	8.99227	7.79734	6.03252	6.3628	6.50171	8.67407	7.01492	10.6572	5.91641	9.80783	11.0236	5.27205	4.81274	9.14242	1.79914	8.14632	9.29395	10.2327	5.17398	5.09978	5.33875	5.23078	5.08432	5.23482	5.24872	5.24763	5.19153	5.11311	5.12513	5.16799	5.12409	5.22014	5.11108	5.19924	5.2347	5.08186	5.0669	5.2157	4.99229	5.1812	5.25686	5.23353
ARHGEF11	35.9135	41.5433	30.4974	34.4442	38.1225	61.3816	30.1605	28.2294	16.4562	37.3028	34.8995	32.3962	34.6566	32.6119	27.979	38.2936	33.007	31.463	26.1107	22.264	24.9087	36.5042	20.385	27.5247	5.85183	5.9693	5.77464	5.88074	5.88399	6.00618	5.91428	6.00372	5.74352	5.87085	5.82937	5.70791	5.75653	5.72245	5.67211	5.82296	5.75047	5.74352	5.61724	5.66188	5.7368	5.89528	5.65688	5.71237
ARHGEF12	24.6481	8.92091	21.0819	11.5665	25.9988	13.6951	6.20437	4.22131	0.325987	19.0437	20.6657	16.1776	15.182	10.5231	20.7499	20.8714	17.3658	23.0992	25.761	7.89041	5.9922	10.8257	4.44182	8.22169	5.60743	5.20015	5.56509	5.30502	5.61558	5.22444	5.14687	5.09943	4.94127	5.46097	5.51359	5.35148	5.33921	5.21761	5.50114	5.45834	5.39852	5.55345	5.60908	5.17587	5.13108	5.26148	5.08044	5.17112
ARHGEF15	-8.19317	-2.09873	-5.46886	-1.18672	4.72718	-5.41761	-4.50021	-3.03107	-0.171572	-4.70067	-6.15385	-5.25113	-2.58173	-2.48375	-3.93612	-1.21227	1.57729	-0.260784	-5.3477	-1.68928	-8.60289	-0.706688	-2.923	-8.14806	4.63454	4.85377	4.74841	4.89618	5.06695	4.77796	4.77471	4.82369	4.92014	4.77978	4.73481	4.74599	4.83323	4.83023	4.80989	4.88812	4.96877	4.90746	4.74359	4.85143	4.65535	4.90337	4.83532	4.6745
ARHGEF16	181.896	164.074	147.745	176.29	199.068	191.07	91.915	40.0831	33.7591	148.521	172.323	199.146	205.292	197.92	232.719	204.252	194.278	158.272	153.263	180.131	243.018	199.678	243.474	222.733	7.46164	7.36255	7.2581	7.52323	7.54619	7.14689	6.97865	6.30877	6.35257	7.208	7.40517	7.56904	7.5985	7.57639	7.8813	7.63093	7.5944	7.36341	7.3027	7.94471	8.26172	7.74008	8.46646	7.88004
ARHGEF17	36.2433	31.0808	22.9321	24.8762	30.1548	27.8189	10.4123	22.2767	13.2288	37.5429	27.9303	52.9932	44.0617	43.8937	49.1472	54.6232	46.6619	47.5291	56.1337	39.0106	41.0499	44.1033	39.6813	43.3841	5.85731	5.75509	5.60961	5.66925	5.70791	5.49428	5.29858	5.81788	5.58838	5.87488	5.6798	6.06796	5.93179	5.93747	6.08827	6.09062	6.00081	6.05383	6.17425	6.11017	6.12515	6.04225	6.19037	6.0408
ARHGEF18	925.895	898.997	805.524	819.376	926.498	1073.14	765.243	790.509	856.693	884.953	779.208	1015.09	1041.94	977.775	870.71	1026.45	1032.77	979.22	1110.57	501.075	568.499	734.509	476.283	660.397	9.59321	9.5633	9.39399	9.52256	9.59101	9.464	9.78188	10.0241	10.0895	9.55633	9.37457	9.86065	9.85843	9.81855	9.74383	9.9866	9.98425	9.92255	10.1238	9.38482	9.43738	9.55733	9.40368	9.31279
ARHGEF19	176.455	190.494	179.304	194.924	207.839	145.232	86.226	72.7131	51.5589	164.627	206.708	170.223	178.631	174.496	160.456	167.143	174.896	169.213	185.688	180.932	273.272	254.797	272.779	272.279	7.43234	7.54798	7.50634	7.65931	7.60333	6.81026	6.89854	6.93094	6.76942	7.33561	7.63588	7.35114	7.40742	7.39992	7.36905	7.34168	7.45639	7.46012	7.55892	7.94963	8.41305	8.06797	8.62576	8.14266
ARHGEF2	1112.13	1136.66	1035.39	1009.65	1084.42	2236.22	2117.56	2237.3	1101.92	962.92	1095.89	1311.15	1374.71	1203.71	1454.45	1479.26	1342.62	1377.9	1265.77	931.088	608.114	921.684	617.015	781.401	9.85843	9.88536	9.74612	9.81518	9.80936	10.5101	11.0944	11.3009	10.3838	9.66388	9.85316	10.2501	10.3092	10.1607	10.4901	10.524	10.4001	10.4173	10.3343	10.2923	9.53217	9.86941	9.77391	9.55733
ARHGEF3	353.909	338.893	347.553	314.652	371.097	632.68	326.952	234.79	168.085	295.553	319.632	215.527	220.894	208.911	203.685	266.045	231.367	198.805	215.38	220.487	178.925	233.448	152.405	280.71	8.31607	8.27678	8.32416	8.26099	8.36382	8.72107	8.61711	8.44463	8.20811	8.08952	8.19747	7.68276	7.69199	7.65805	7.69811	7.99779	7.8273	7.66203	7.74545	8.21639	7.86668	7.94297	7.82572	8.17755
ARHGEF4	68.2314	71.3149	52.7941	60.8862	90.6548	137.842	113.286	60.0093	26.1148	78.2414	50.9256	78.5128	78.5881	96.1343	94.4302	102.007	97.7146	90.3173	77.7069	88.0017	123.38	101.298	136.783	80.1693	6.37585	6.43375	6.21429	6.35985	6.61935	6.74575	7.24467	6.72732	6.12177	6.49051	6.11108	6.42022	6.43168	6.65725	6.71092	6.70498	6.69935	6.66555	6.48796	6.97491	7.36586	6.85858	7.68029	6.61021
ARHGEF5	175.766	199.562	158.639	149.387	193.823	219.125	140.147	129.271	160.256	145.609	130.032	223.119	190.403	178.674	211.346	196.589	168.913	144.538	144.122	52.404	78.5179	96.6412	63.3349	96.8068	7.42695	7.61095	7.35302	7.30713	7.51334	7.3372	7.52853	7.67845	8.14918	7.18659	7.03526	7.73351	7.50046	7.43834	7.75187	7.57501	7.40447	7.24712	7.21137	6.39164	6.7746	6.8048	6.65851	6.81198
ARHGEF5L	413.999	387.582	373.407	358.681	312.732	435.661	210.013	154.678	147.488	333.961	285.797	343.334	367.998	362.627	308.231	334.749	360.577	325.856	290.72	141.768	141.755	208.102	105.012	181.584	8.52834	8.44586	8.4098	8.43565	8.13517	8.24258	8.03674	7.90363	8.05021	8.24774	8.05096	8.30466	8.3858	8.40469	8.2625	8.31051	8.45232	8.34015	8.17092	7.62115	7.55419	7.79427	7.34118	7.62172
ARHGEF6	2.00047	3.6148	1.48669	-2.11506	2.84602	8.39878	2.14407	6.64214	2.28353	-1.34438	-0.122284	6.83026	-0.00785301	1.44722	-3.54558	0.547898	4.0175	2.1878	-4.73622	-0.457471	2.14942	4.07612	-0.0107591	3.28513	4.97914	5.03398	4.97517	4.86633	5.01308	5.11635	5.00644	5.19682	5.01742	4.88121	4.92457	5.11804	4.91547	4.95833	4.82188	4.94263	5.04274	4.9861	4.76603	4.89293	5.00309	5.05288	4.92836	5.02486
ARHGEF7	127.866	120.208	122.386	122.013	151.602	204.041	126.589	113.735	63.7968	128.53	136.24	157.156	157.931	155.079	157.2	156.292	149.229	134.493	142.738	100.712	89.1382	136.199	90.5691	106.419	7.01508	6.95182	7.02985	7.05738	7.208	7.23155	7.39992	7.51276	7.03465	7.02154	7.09699	7.24121	7.23603	7.24373	7.33628	7.249	7.23112	7.16298	7.19859	7.14985	6.92983	7.23334	7.12488	6.92304
ARHGEF9	10.5087	12.444	9.08286	9.46057	8.09847	8.18428	5.83703	6.7198	4.65338	15.0622	8.00948	7.02781	13.1547	9.97646	7.1335	10.7387	13.1333	11.1942	12.2963	5.36246	13.0522	12.3728	13.9195	16.0661	5.24558	5.30423	5.21481	5.23783	5.16581	5.11133	5.13368	5.19991	5.12134	5.36259	5.16909	5.12435	5.29032	5.20333	5.14538	5.22329	5.29017	5.25328	5.27257	5.09014	5.37266	5.30665	5.41773	5.4115
ARID1A	135.651	145.043	151.674	145.012	187.41	130.337	73.801	63.6263	55.2659	161.835	159.664	142.145	131.711	142.913	127.885	168.716	141.291	118.332	112.548	106.357	130.574	133.061	108.2	155.211	7.08152	7.18854	7.29165	7.27731	7.47288	6.68504	6.71791	6.78034	6.85235	7.31141	7.29298	7.09966	7.00345	7.11882	7.07664	7.35302	7.16031	6.98429	6.90039	7.21841	7.44332	7.19661	7.38198	7.40482
ARID1B	0.52119	6.07442	0.454647	-0.115122	0.898023	2.71071	-0.52639	-0.584539	0.93429	3.00039	1.9602	2.33593	4.94042	-1.69909	3.40035	3.72557	-0.502964	0.393204	1.35691	2.16091	1.16316	0.51371	0.839495	3.54908	4.92959	5.11292	4.9395	4.93071	4.95335	4.98799	4.91439	4.91432	4.96411	5.01277	4.98557	4.98776	5.06644	4.85561	5.03561	5.03766	4.90321	4.92894	4.95869	4.98104	4.97203	4.9403	4.95636	5.03269
ARID2	42.4999	33.8633	31.2468	42.2435	41.7622	25.0139	14.6117	9.17155	3.34564	25.9961	36.5314	41.1887	44.947	47.0186	33.1225	63.3118	34.5328	29.8067	34.3218	19.7527	19.3986	34.7747	17.9477	29.1563	5.97618	5.81717	5.79323	6.03909	5.94455	5.44863	5.45244	5.30591	5.0621	5.63314	5.86078	5.86425	5.94686	5.98534	5.78471	6.22214	5.7791	5.70852	5.78921	5.58344	5.57146	5.86524	5.57019	5.74881
ARID3A	181.334	184.5	171.055	162.902	191.845	174.519	192.771	145.187	140.049	149.15	141.14	406.241	328.662	342.123	421.919	419.24	326.838	304.272	255.435	170.125	112.032	145.888	112.322	125.838	7.45903	7.50525	7.45073	7.41497	7.5022	7.03047	7.92459	7.82333	7.98555	7.21323	7.14764	8.54022	8.23844	8.32985	8.68409	8.63076	8.30466	8.25826	7.9961	7.8765	7.24121	7.3291	7.42844	7.12941
ARID3C	-2.21195	3.10397	-4.08544	-1.33065	-0.676947	3.62244	2.02826	-2.03389	0.506666	1.9033	-1.21734	1.12464	-0.092196	-0.534054	-5.00632	-0.599784	2.49512	0.711369	-2.50234	3.44261	-2.54906	-1.76978	-2.9804	-0.870102	4.83486	5.01862	4.79343	4.89149	4.90416	5.00964	5.00234	4.86002	4.94768	4.97786	4.89172	4.95117	4.91308	4.89488	4.77558	4.90817	4.99713	4.9406	4.83516	5.02445	4.85161	4.86996	4.83384	4.89834
ARID4A	30.4383	26.6067	24.1929	26.5822	28.2372	50.8494	37.0993	70.8316	121.302	35.785	40.6605	51.5318	57.2515	60.2571	47.8676	76.5884	56.4162	56.1676	56.3505	36.8875	33.0136	38.17	39.8224	35.5558	5.73753	5.6659	5.6422	5.70641	5.66495	5.86777	6.0745	6.90579	7.81071	5.83689	5.94485	6.04431	6.13725	6.2011	6.06731	6.40807	6.15449	6.20143	6.17926	6.06179	5.95224	5.92579	6.19358	5.88631
ARID4B	58.601	45.6573	39.3197	51.0397	51.0083	109.469	111.3	153.466	169.306	77.9127	78.15	75.0302	105.254	102.443	129.888	153.614	127.606	134.026	114.055	100.841	77.6081	82.7121	73.0545	63.1391	6.23888	6.0481	5.9712	6.20449	6.09834	6.50415	7.22635	7.89264	8.21334	6.48455	6.49253	6.3756	6.72865	6.72502	7.09609	7.2224	7.01103	7.15518	6.91223	7.15116	6.76322	6.64031	6.83466	6.37299
ARID5A	5.32393	10.3059	5.81875	5.66336	6.10817	14.189	6.93731	6.47401	4.52703	11.1619	4.32857	9.29533	0.890251	4.01032	6.55126	3.50153	3.4485	4.78541	5.7252	6.14738	6.44631	6.96221	7.5555	-0.216265	5.08945	5.24138	5.11219	5.11627	5.1066	5.23606	5.17498	5.1896	5.11591	5.25664	5.05947	5.18449	4.94319	5.03677	5.12945	5.03199	5.0252	5.06768	5.09344	5.11627	5.14649	5.14485	5.1892	4.91888
ARID5B	323.533	274.825	241.577	276.753	327.105	671.865	631.874	682.788	968.734	223.798	219.636	148.347	153.717	133.864	115.35	195.861	164.778	163.462	190.343	140.073	235.128	134.337	181.739	214.217	8.20295	8.00569	7.8677	8.08898	8.2003	8.80463	9.49379	9.80667	10.2271	7.74293	7.72042	7.15718	7.20161	7.03779	6.93324	7.57088	7.37097	7.40702	7.59338	7.60052	8.2202	7.21009	8.06042	7.83462
ARIH1	121.821	118.894	122.074	120.887	135.697	225.899	157.62	279.025	786.122	126.379	129.638	117.697	143.085	139.284	94.2931	154.77	139.463	115.725	145.9	94.5427	80.3052	120.32	74.2646	127.138	6.95669	6.93808	7.02636	7.04585	7.05647	7.37746	7.67505	8.6708	9.98967	7.00261	7.02869	6.86567	7.10518	7.08562	6.70791	7.235	7.14268	6.95282	7.23012	7.06336	6.79886	7.06839	6.85277	7.14523
ARIH2	466.322	455.265	472.428	406.782	394.877	289.03	182.468	112.669	60.5295	401.785	388.122	435.615	433.209	401.748	441.652	397.135	345.142	393.006	358.339	272.946	289.063	361.968	237.726	341.947	8.67569	8.66543	8.70335	8.60234	8.44463	7.71427	7.85879	7.50128	6.9648	8.50595	8.45955	8.64165	8.59522	8.54949	8.75465	8.54592	8.38268	8.60501	8.45676	8.5016	8.49632	8.54639	8.43089	8.43812
ARL1	213.582	208.729	195.455	195.357	189.254	212.328	96.8476	76.3527	50.1146	202.001	165.887	136.826	139.777	163.479	129.052	125.985	167.653	170.076	207.085	118.864	68.9259	113.943	57.0331	92.8513	7.68658	7.67055	7.60875	7.66246	7.48533	7.28999	7.0472	6.98612	6.73909	7.60293	7.35077	7.05141	7.0701	7.30224	7.08884	6.95968	7.39277	7.46419	7.69687	7.36791	6.62658	6.99716	6.54238	6.76224
ARL10	15.2384	2.23879	4.88968	7.94037	-0.0414262	13.9871	-2.86117	-3.19947	1.70778	1.46819	11.695	0.97455	10.0778	6.88947	7.13831	2.57611	5.30582	10.5159	7.35217	0.761172	2.09731	-0.450257	3.31711	5.35857	5.37884	4.99263	5.08333	5.1891	4.92474	5.23184	4.83245	4.81751	4.99321	4.96549	5.27769	4.94601	5.20538	5.12106	5.14568	5.00389	5.07896	5.2347	5.13629	4.93281	5.00139	4.91124	5.04261	5.08771
ARL11	-2.42679	-0.509037	2.59124	-5.10259	0.0741591	-1.48642	1.48093	-0.878259	-0.920916	0.705711	2.48138	0.130266	-2.59977	5.38135	-3.6509	0.627946	0.844063	-1.26786	3.68902	0.531466	-2.04245	-2.16656	-1.84501	4.11049	4.82773	4.9063	5.00992	4.76872	4.9285	4.88313	4.98358	4.90273	4.89091	4.94342	5.00316	4.91929	4.83275	5.07736	4.81868	4.94523	4.94557	4.87609	5.03153	4.92586	4.86754	4.85725	4.86969	5.04994
ARL13A	1.08216	3.14788	3.04386	-2.14813	4.57022	-5.53942	-1.47984	2.83579	-0.0804006	-6.76939	0.0220186	-2.49435	5.02444	8.85855	3.49977	0.9367	-1.64043	5.06216	1.62967	7.10051	-0.902485	-7.25906	4.39554	0.676331	4.94947	5.01991	5.02399	4.86522	5.06266	4.77506	4.87979	5.04749	4.92391	4.71308	4.92936	4.83713	5.06964	5.17253	5.03862	4.95561	4.86934	5.07549	4.96753	5.15006	4.90425	4.69986	5.07933	4.94718
ARL13B	7.22092	8.75084	7.19618	10.9441	7.96879	19.2387	10.1363	11.8179	11.7806	13.3597	12.703	11.9038	6.80553	13.8033	6.3008	13.6707	10.9142	10.3678	12.402	5.97494	-1.186	10.1207	4.78706	11.188	5.14762	5.19569	5.15523	5.28274	5.16211	5.33684	5.28833	5.41688	5.51846	5.31859	5.3072	5.24667	5.1183	5.30294	5.1227	5.29369	5.23169	5.23052	5.27569	5.11037	4.89495	5.2404	5.0928	5.25991
ARL14	161.877	141.768	158.04	180.28	262.737	843.838	257.26	303.109	181.402	103.176	80.238	140.304	121.743	141.675	109.907	292.204	143.591	128.327	126.237	95.3602	56.0768	109.655	49.4444	65.9216	7.30997	7.16086	7.34673	7.5523	7.90589	9.13883	8.29821	8.77837	8.29115	6.76268	6.519	7.08732	6.90039	7.10611	6.88287	8.13094	7.18401	7.09229	7.03325	7.0761	6.41169	6.94958	6.40944	6.41834
ARL15	26.3991	28.4932	24.1967	25.6142	33.957	45.8679	23.4988	13.7877	14.6356	34.9541	35.8244	24.0326	24.2124	25.4678	21.7796	27.0327	24.688	34.0666	26.1325	20.975	22.3382	23.9196	22.9929	21.1937	5.64696	5.7082	5.64242	5.69029	5.79694	5.79399	5.73834	5.50918	5.65852	5.82012	5.84973	5.53206	5.54615	5.57211	5.52548	5.59011	5.56966	5.79619	5.61799	5.62321	5.66044	5.61182	5.74454	5.55087
ARL16	3510.27	3392.56	2311.79	2824.35	3595.76	7841.1	5701.56	6314.23	6884.78	4111.51	4712.78	6258.83	6057.07	6603.09	7343.56	6446.41	5500.79	5879.7	5501.35	7368.99	7170.42	6717.98	7518.9	4644.93	11.4952	11.4918	10.9003	11.343	11.5947	12.4564	12.4989	12.668	12.563	11.8438	12.0668	12.6013	12.4852	12.6321	12.7885	12.6767	12.5376	12.5756	12.5756	13.179	13.0436	12.806	13.2096	12.2353
ARL17B	8.75252	9.24326	9.15144	8.75521	8.5208	17.844	12.417	13.3347	20.3202	10.0382	8.27926	23.8612	28.483	28.2371	20.9448	22.6263	23.3677	22.922	21.0452	14.3113	16.4173	15.399	16.6224	15.8445	5.19276	5.20973	5.21744	5.2157	5.17542	5.30934	5.37113	5.48966	5.9192	5.2254	5.17778	5.52846	5.63241	5.63095	5.50669	5.49886	5.54045	5.54961	5.49684	5.39971	5.48157	5.39408	5.52076	5.4031
ARL17P1	9.59104	12.161	9.91755	9.16151	7.96616	6.24076	21.5084	20.7345	6.40304	12.7853	15.4319	29.9991	29.4086	32.2508	32.5613	28.5489	35.6406	27.9146	23.9675	25.6558	31.5653	28.6437	44.7784	13.1809	5.21771	5.2957	5.24113	5.22843	5.16186	5.06721	5.68456	5.76668	5.21551	5.30231	5.37759	5.65962	5.65021	5.71351	5.77028	5.62626	5.80085	5.67057	5.5674	5.76942	5.92106	5.72484	6.30609	5.3252
ARL2	1056.58	1151.53	1353.96	1173	1094.53	1056.69	593.732	482.543	512.091	915.573	978.541	803.488	907.697	810.692	808.593	843.215	778.593	797.552	747.403	600.587	536.148	720.576	442.931	755.039	9.77391	9.89774	10.112	10.0241	9.823	9.43738	9.39578	9.36189	9.542	9.60102	9.69412	9.542	9.6712	9.55541	9.64604	9.69632	9.55081	9.60197	9.51087	9.64408	9.35533	9.53685	9.30069	9.51381
ARL2BP	827.563	893.24	884.906	679.673	675.299	835.389	413.596	330.103	302.193	944.357	781.515	933.441	886.624	877.62	799.274	845.437	765.73	855.076	778.034	420.098	229.002	447.668	187.002	369.457	9.44238	9.55407	9.52133	9.28598	9.15165	9.12769	8.92411	8.87532	8.92751	9.63724	9.37737	9.72756	9.64274	9.67969	9.62893	9.70195	9.52723	9.70195	9.55912	9.1224	8.18409	8.83976	8.10383	8.54104
ARL3	6.40448	14.3567	4.51845	2.80252	6.21115	8.83722	6.10828	6.05624	0.674436	2.06158	5.77885	11.4553	12.0792	17.0168	9.39945	16.1372	13.833	19.3024	8.19724	6.11258	21.8509	6.73006	14.698	14.3153	5.12235	5.3581	5.07168	5.02296	5.10948	5.12484	5.14293	5.173	4.95376	4.98237	5.10221	5.23493	5.26057	5.3832	5.20973	5.35277	5.30961	5.46329	5.15963	5.11499	5.64945	5.13702	5.44737	5.36089
ARL4A	68.7608	64.8443	78.6826	78.957	102.393	169.762	104.79	122.566	163.781	74.7198	73.5212	39.0055	48.3585	40.7914	38.551	71.7785	57.9616	60.4091	65.5086	29.6882	39.3544	43.8488	32.4523	51.3676	6.38358	6.34956	6.55118	6.58519	6.74207	6.99546	7.13501	7.61035	8.17533	6.44285	6.43496	5.82714	6.00081	5.88213	5.8869	6.34357	6.17896	6.27066	6.31824	5.87488	6.08718	6.03778	6.02077	6.18998
ARL4C	32.6313	33.9492	35.7324	29.386	39.5485	45.7772	11.8905	5.52329	6.40958	30.823	40.2584	23.0787	21.4733	10.8028	7.63107	19.4621	24.9159	21.9502	19.6063	24.1268	17.3267	26.1894	9.10502	21.3884	5.78955	5.81911	5.89741	5.77125	5.90788	5.79168	5.35277	5.15322	5.2158	5.73456	5.93519	5.50977	5.48323	5.22391	5.15951	5.42657	5.57506	5.52491	5.46184	5.72272	5.51033	5.67172	5.25035	5.55801
ARL4D	43.7542	46.7942	53.1462	46.5688	30.6047	41.7838	20.9082	35.1405	106.571	47.0958	32.5637	33.6679	29.8439	38.9517	30.9972	36.4317	36.8102	44.8633	69.064	32.7082	31.957	25.5391	24.7467	25.4961	5.99855	6.06731	6.21983	6.12515	5.71685	5.73047	5.66554	6.19838	7.6685	6.0524	5.78319	5.73326	5.65962	5.84515	5.73896	5.79168	5.82393	6.00703	6.36788	5.95101	5.92962	5.6548	5.80021	5.66375
ARL5A	600.427	524.263	566.259	516.341	500.26	557.143	292.494	223.545	187.078	644.922	483.178	460.979	491.123	501.649	462.411	541.829	495.173	516.69	459.089	345.429	262.151	382.849	253.23	323.507	8.99768	8.8423	8.93026	8.90729	8.74388	8.56799	8.4605	8.37101	8.33411	9.14275	8.74454	8.72563	8.77178	8.85403	8.82296	8.99768	8.88796	8.97293	8.8106	8.84045	8.36503	8.62628	8.52174	8.37002
ARL5B	22.9791	24.6333	23.7147	28.9463	31.6635	94.8887	84.0174	97.9583	71.3611	39.7922	37.4142	32.0924	38.5968	45.173	39.873	46.6118	46.7566	51.5735	59.5533	26.6886	20.2128	31.5204	15.0573	26.0646	5.56657	5.61775	5.63149	5.76152	5.74352	6.37239	6.8653	7.3137	7.17622	5.92141	5.87424	5.70293	5.8335	5.95642	5.91163	5.96594	6.00281	6.12673	6.22554	5.79552	5.59584	5.79014	5.46211	5.68095
ARL6	0.278375	-1.3992	0.1017	-0.268889	-1.43826	4.10274	-0.00154673	0.531825	-0.328627	-0.272631	1.99846	4.30367	3.09397	3.28999	-0.894905	1.96296	1.17798	0.360622	5.78732	-1.02346	0.61734	-0.565813	-2.45504	0.267942	4.92046	4.87715	4.93004	4.92541	4.88051	5.02049	4.93299	4.95875	4.91404	4.91363	4.98662	5.04554	5.01174	5.01518	4.9044	4.98658	4.95613	4.92762	5.09531	4.87402	4.95343	4.90742	4.84936	4.93407
ARL6IP1	702.638	685.274	805.11	660.714	822.28	831.605	612.411	693.471	1446.61	797.966	1653.6	1157.68	1107.21	1085.66	645.684	657.578	966.792	907.751	935.301	646.056	1408.76	991.535	1075.22	2084.96	9.22046	9.19904	9.39282	9.24579	9.42962	9.1224	9.44548	9.83059	10.699	9.41463	10.4698	10.0606	9.96455	9.98967	9.29699	9.29304	9.89654	9.79221	9.84339	9.74897	10.7009	9.9955	10.5617	10.939
ARL6IP4	136.061	142.179	128.805	148.316	152.346	173.749	93.2109	63.005	65.1136	156.85	193.512	186.072	159.057	150.174	179.51	149.091	143.705	138.234	158.308	142.679	155.084	202.268	147.501	130.451	7.08839	7.16428	7.09076	7.30164	7.21137	7.02636	6.99769	6.7674	7.06122	7.27227	7.54962	7.4654	7.24539	7.19772	7.5298	7.18193	7.18496	7.19337	7.34955	7.62825	7.67959	7.75968	7.78426	7.17836
ARL6IP5	880.23	870.403	943.09	817.172	814.675	954.649	498.184	361.929	315.628	844.956	1107.82	938.124	882.953	905.66	570.624	553.19	815.293	687.951	594.131	484.732	1034.6	576.065	797.851	1535.49	9.52542	9.52133	9.60723	9.51699	9.4202	9.30069	9.16619	8.98881	8.98451	9.49582	9.87761	9.73143	9.6393	9.71641	9.12167	9.03	9.62617	9.40467	9.17233	9.33559	10.2455	9.21071	10.1091	10.5042
ARL6IP6	114.807	110.601	127.36	97.6034	106.168	138.714	67.3243	52.0183	34.9416	121.587	115.585	111.364	99.3237	106.574	55.6837	71.0269	106.749	103.506	98.153	60.8268	65.5858	78.9873	68.9928	137.366	6.88775	6.86027	7.07126	6.79595	6.77649	6.7534	6.61811	6.57225	6.38033	6.95141	6.89613	6.80523	6.66774	6.77612	6.1939	6.3325	6.80086	6.81198	6.73618	6.54374	6.57118	6.59395	6.76268	7.24278
ARL8A	-2.19098	0.279232	2.05289	0.951959	5.13363	5.46656	-0.232948	-2.30772	-0.599535	5.90881	7.49869	3.05581	3.18533	1.77613	-3.22095	0.457139	2.7317	1.93137	3.18718	5.18413	3.0213	-0.292862	-2.66364	3.4611	4.83551	4.93081	4.99365	4.96389	5.07831	5.05004	4.92471	4.84982	4.90408	5.10083	5.15499	5.0083	5.01471	4.96827	4.83143	4.94023	5.0054	4.9777	5.0163	5.08348	5.03135	4.91646	4.84339	5.03034
ARL8B	447.382	409.222	417.537	350.395	401.113	602.798	405.083	456.727	347.533	483.909	433.563	388.577	449.554	414.386	383.988	427.735	487.946	489.817	434.854	223.527	215.103	246.474	147.079	247.071	8.62193	8.50778	8.55019	8.40646	8.46335	8.6686	8.90313	9.29699	9.10667	8.74388	8.5911	8.47863	8.64106	8.5911	8.54696	8.65917	8.86586	8.90652	8.73573	8.23186	8.10582	8.02687	7.77853	8.01698
ARL9	24.1838	18.4903	20.8123	9.54344	17.7953	9.8022	3.68977	-0.876413	6.19761	11.709	14.1215	12.16	16.5289	7.12226	2.59235	7.95729	4.36302	6.6784	7.43034	8.39793	4.89129	2.32548	1.93773	4.14549	5.59584	5.46388	5.55844	5.24002	5.42802	5.14521	5.06044	4.90291	5.20068	5.27218	5.34186	5.2527	5.37124	5.12752	5.01048	5.15443	5.05321	5.1249	5.13859	5.19161	5.09161	4.99811	4.99255	5.05086
ARMC1	399.195	329.709	302.175	364.022	306.562	455.215	176.828	134.692	86.6726	382.448	357.583	386.055	356.044	401.526	390.847	400.236	352.419	348.72	327.011	235.575	211.862	322.369	181.772	305.353	8.48217	8.23781	8.14067	8.45354	8.11191	8.30511	7.81888	7.73	7.41947	8.43325	8.3514	8.46869	8.34015	8.54826	8.57124	8.55791	8.41713	8.43565	8.33088	8.30279	8.08485	8.39892	8.0613	8.29678
ARMC10	288.528	310.329	357.13	292.881	268.104	290.983	118.158	87.3499	99.3661	265.258	271.277	276.148	265.65	284.874	208.583	260.819	253.432	252.738	221.313	129.992	116.276	167.345	90.3639	166.704	8.05569	8.15134	8.35662	8.16575	7.93173	7.72555	7.30607	7.15068	7.58587	7.95464	7.98371	8.01556	7.93951	8.08173	7.73	7.96816	7.9557	8.01509	7.78826	7.49685	7.28778	7.51822	7.12018	7.50354
ARMC2	-3.27146	-2.17867	-0.0396044	-0.751872	-2.75475	2.85817	-2.39038	0.404585	-0.949255	2.56635	1.13314	0.242975	1.07028	2.0487	1.78505	1.62173	2.45151	0.64608	0.0571112	-1.35353	-3.70055	3.39414	-1.0541	-4.9722	4.79876	4.85109	4.92537	4.90938	4.83808	4.99167	4.8487	4.95403	4.88991	4.99763	4.96211	4.92263	4.94901	4.97643	4.98601	4.97656	4.99573	4.93807	4.91795	4.86276	4.81362	5.03124	4.89483	4.77057
ARMC3	0.509746	10.329	0.0464552	-2.52437	0.0760893	-4.4305	-6.75846	-0.716714	-2.17475	-8.97738	0.0452807	-3.51465	-4.38704	-3.17105	0.694916	-4.35451	-8.15823	-2.21533	-1.63852	-3.77482	-2.26225	0.933647	-5.1033	-4.6905	4.92919	5.24223	4.92831	4.8527	4.9286	4.80519	4.69721	4.90906	4.84187	4.63825	4.93009	4.80351	4.77738	4.80603	4.95361	4.79013	4.65475	4.84597	4.8643	4.77885	4.8608	4.95285	4.75946	4.78019
ARMC4	-5.99312	3.93609	-6.57364	5.03043	-1.83673	-9.31173	-1.94659	-0.269159	1.63793	-4.60656	-5.84558	-3.11776	-0.078341	-3.47055	2.24365	-5.87241	-2.54862	-3.62932	-3.70089	1.94596	-2.80829	1.90023	1.68007	-1.55651	4.70477	5.04524	4.70922	5.09706	4.86729	4.67356	4.86348	4.92702	4.99048	4.78299	4.74631	4.81679	4.91345	4.79707	4.99965	4.74016	4.83789	4.79796	4.79846	4.974	4.84239	4.98407	4.98451	4.8766
ARMC5	44.9145	28.1749	23.0897	27.8376	70.0983	80.3968	49.6514	36.8304	47.6898	50.9008	42.4209	39.0119	32.6542	29.0194	60.0826	66.3542	41.6561	35.3276	39.1271	26.3312	27.6237	53.7322	34.7849	27.6828	6.02009	5.70041	5.61558	5.73582	6.36359	6.21846	6.31402	6.23422	6.68642	6.10598	5.97471	5.82741	5.71587	5.64557	6.26091	6.26321	5.91294	5.82482	5.88494	5.78721	5.81293	6.21983	6.07529	5.71745
ARMC6	118.512	121.98	110.422	123.017	128.123	150.155	58.0304	27.7091	25.4178	110.515	107.975	79.5691	66.7545	57.7737	73.6618	69.1068	78.0473	57.7333	70.3356	84.0229	84.9424	120.494	72.6665	108.301	6.92604	6.96739	6.89538	7.07308	6.98544	6.84706	6.46942	5.98502	6.1005	6.83598	6.82306	6.43126	6.27117	6.1642	6.44568	6.30545	6.46378	6.22493	6.38553	6.92604	6.86816	7.06987	6.82675	6.94447
ARMC7	86.3787	97.2865	75.8131	70.0894	74.9308	49.3659	40.2014	64.8577	48.7202	109.469	92.0032	119.802	94.4077	107.745	134.05	134.233	106.27	86.2513	83.7377	51.6204	67.1777	76.5675	61.5552	76.3171	6.59176	6.72462	6.51627	6.48051	6.4282	5.84751	6.13706	6.80224	6.70929	6.82493	6.65902	6.88488	6.61517	6.78934	7.13756	7.0447	6.79643	6.61395	6.56202	6.37435	6.59849	6.55736	6.62692	6.56202
ARMC8	17.9041	23.1182	27.2404	17.4088	20.979	26.7338	9.36501	8.51149	6.24793	24.402	18.3011	12.2209	14.8693	10.8847	13.6084	19.0409	11.5835	10.7905	16.7419	11.8231	9.84958	13.604	7.77134	12.8414	5.44987	5.58315	5.71077	5.47941	5.50669	5.47844	5.26305	5.27907	5.20357	5.5999	5.45075	5.25425	5.33112	5.22601	5.32142	5.41733	5.24748	5.24292	5.38867	5.3112	5.26491	5.34308	5.19707	5.31473
ARMC9	14.0946	18.2548	19.1027	10.6047	6.0735	8.15539	11.3089	14.1788	5.21394	12.5838	12.5889	18.5834	14.4262	13.3292	20.2389	11.018	18.3011	17.3578	14.4617	11.494	13.6736	18.6495	12.4495	8.89884	5.34842	5.45791	5.50714	5.27146	5.10549	5.11024	5.33112	5.5263	5.14805	5.29667	5.30383	5.40646	5.31964	5.28905	5.48252	5.23017	5.42259	5.41717	5.32709	5.3005	5.39173	5.4875	5.36824	5.19243
ARMCX1	-1.67734	-0.931019	2.17855	2.49662	-1.79984	-3.88016	-1.98947	-3.48601	-0.198118	-2.07772	-2.46513	-1.93733	0.984895	-1.46869	-2.29533	-2.45551	-4.86074	1.55839	-0.674876	-0.791688	-2.80264	3.88556	0.659136	-7.30702	4.85286	4.89164	4.99703	5.01337	4.86838	4.82026	4.86205	4.80756	4.91888	4.85905	4.85344	4.85436	4.94633	4.86291	4.8608	4.84887	4.76119	4.96697	4.89446	4.88178	4.84255	5.04736	4.9506	4.70094
ARMCX2	-2.01194	-1.00639	-2.12643	-5.20484	-3.37366	-2.2747	-2.51833	-2.88557	6.58879	10.5798	1.32569	3.69311	0.0252815	2.71214	-1.59919	3.90911	1.01329	0.831806	4.12121	1.73317	3.59226	-3.98506	-0.452417	-0.0682144	4.84193	4.88896	4.8591	4.76512	4.81826	4.86329	4.8444	4.82881	5.2253	5.24014	4.96781	5.02754	4.91643	4.99708	4.88209	5.04208	4.95109	4.94393	5.04474	4.96677	5.04968	4.80251	4.91415	4.92374
ARMCX3	18.2254	9.75979	16.0694	13.8124	11.7153	27.3157	19.0755	34.9404	25.3085	18.0412	14.6544	30.0303	27.9821	25.2766	18.9205	22.3714	33.4875	35.3292	38.4286	27.9536	16.934	13.8264	17.9481	19.7769	5.45878	5.22601	5.41589	5.37696	5.26697	5.48698	5.60658	6.19445	6.09613	5.43744	5.35589	5.66044	5.62355	5.5678	5.45407	5.49346	5.76065	5.82516	5.8703	5.82773	5.49716	5.34983	5.57049	5.51329
ARMCX5	62.3775	57.8242	51.1366	64.8465	66.2529	114.401	45.4538	37.2164	43.0779	65.3669	59.389	52.3121	48.9772	61.1037	38.2311	49.7057	64.0577	53.7214	68.3246	36.9358	17.8618	47.9357	23.0156	44.2034	6.2922	6.24221	6.18421	6.41631	6.31402	6.54474	6.24146	6.24297	6.58956	6.32387	6.24221	6.05734	6.01072	6.21344	5.88277	6.01164	6.26531	6.16206	6.35936	6.0647	5.52846	6.11984	5.74636	6.0583
ARMCX6	92.0797	86.6952	91.6975	70.1365	69.5366	95.5361	57.8419	72.9102	107.034	77.7024	90.25	98.4872	111.606	100.981	91.1386	92.6312	114.271	111.084	119.713	53.916	61.7227	54.2246	53.8319	74.8886	6.65202	6.60655	6.70637	6.48228	6.3557	6.38197	6.46573	6.9337	7.67413	6.48014	6.64031	6.66185	6.79091	6.70742	6.67267	6.59638	6.88408	6.9007	6.96623	6.41988	6.51067	6.22865	6.48455	6.54238
ARMET	1493.72	1727.25	1995.23	1673.97	1725.91	3317.79	2284.82	2702.15	2044.71	1816.65	2244.69	2637.25	2193.18	2174.33	1891.44	1807.14	2163.48	2813.38	2648.56	1177.4	1435.95	1286.73	1194.84	2774.51	10.2693	10.5076	10.6877	10.5725	10.4975	11.0625	11.2102	11.6227	11.0884	10.6006	10.9306	11.2789	10.9783	11.0174	10.8496	10.8113	11.0908	11.4701	11.4278	10.6393	10.7408	10.4016	10.6852	11.3979
ARMS2	-3.87214	0.238506	1.06299	-8.6374	-0.779524	2.02919	-1.63647	-3.07562	0.36331	1.7415	-6.99493	-0.73342	-0.372637	-4.36611	-0.680114	-3.38702	-4.18942	-0.653332	0.548292	3.41467	-0.691166	-2.8668	-5.3543	-0.407211	4.77753	4.9294	4.96038	4.65581	4.90063	4.97122	4.8742	4.82194	4.94265	4.9731	4.70901	4.8931	4.90461	4.77102	4.9115	4.81853	4.78114	4.89466	4.93353	5.02332	4.91072	4.83713	4.75047	4.91255
ARNT	19.0604	31.0106	21.8885	15.2724	23.9103	25.0033	10.7046	17.7773	6.10776	22.0454	17.2448	17.6001	21.5812	18.2014	22.2023	30.0479	26.7587	25.0364	23.1706	21.1408	15.6432	21.4611	13.2984	17.9103	5.47476	5.75376	5.58463	5.41916	5.56704	5.44833	5.30961	5.6687	5.19577	5.53709	5.42412	5.38107	5.48445	5.41039	5.5373	5.65885	5.61533	5.59655	5.54599	5.62901	5.45773	5.55501	5.3966	5.46168
ARNT2	10.3273	15.9759	11.6334	5.8808	13.463	20.1006	9.01156	10.8859	3.90685	9.84607	8.80615	17.8988	16.1563	31.271	30.1307	39.0602	29.1195	27.5819	46.5156	11.666	4.85012	4.77528	5.61861	7.88969	5.24052	5.39803	5.29435	5.12364	5.31188	5.35338	5.24938	5.37648	5.08765	5.2193	5.19487	5.38867	5.36246	5.69117	5.72306	5.83448	5.66473	5.66375	6.01714	5.30466	5.09021	5.07524	5.12129	5.16118
ARNTL	48.3205	54.6833	50.512	52.6394	44.1152	121.852	91.3047	103.4	140.544	38.3724	49.5557	63.4476	49.4881	57.1555	33.6038	53.3923	68.481	57.2621	50.4563	28.5501	23.212	32.6517	28.1148	22.4976	6.08587	6.19128	6.17549	6.22971	5.98158	6.60605	6.9708	7.39319	7.99042	5.89389	6.09146	6.23391	6.01976	6.1529	5.79669	6.07053	6.3308	6.21429	6.0833	5.84372	5.6881	5.81875	5.89836	5.58507
ARNTL2	16.5008	24.8976	7.3357	6.46058	11.4057	22.0018	10.9863	11.192	12.1314	15.7362	8.93648	7.40139	8.00676	9.59598	8.29108	16.3352	15.8159	5.91948	3.84548	0.174197	-1.2141	1.49322	0.683539	1.3451	5.41364	5.62242	5.15866	5.14335	5.25953	5.38886	5.31987	5.39132	5.5365	5.38046	5.19837	5.13511	5.15017	5.1944	5.17757	5.35831	5.36043	5.10236	5.03693	4.91337	4.89413	4.97085	4.95141	4.96636
ARPC1A	3577.2	3786.68	4101.86	3755.42	3345.83	3674.2	2168.03	1736.49	1575.7	3163.06	2721.32	2936.23	3021.51	2836.84	3019.33	2982.71	2737.43	2772.1	2879.97	1739.95	1764.34	2379.1	1250.87	1869.17	11.5397	11.6586	11.7152	11.7415	11.455	11.2483	11.1353	11.0094	10.8055	11.4586	11.2584	11.448	11.4748	11.4147	11.51	11.555	11.4619	11.4435	11.5675	11.2031	11.0382	11.2932	10.753	10.7947
ARPC1B	569.573	565.851	700.245	591.013	519.281	461.11	252.495	182.719	214.543	543.223	471.779	501.196	540.176	412.134	437.872	391.094	397.434	430.595	420.337	236.718	233.882	275.589	168.52	242.363	8.94395	8.93888	9.22046	9.08713	8.79541	8.32416	8.27569	8.10478	8.49995	8.9059	8.71578	8.82732	8.92346	8.58394	8.73864	8.51987	8.58796	8.72437	8.68646	8.31012	8.21059	8.17299	7.96348	7.99312
ARPC2	1271.2	1291.95	1212.52	1256.86	1187.53	1356.79	770.486	553.035	604.054	1226.66	1025.94	1021.84	966.543	938.593	990.191	998.361	929.423	925.873	939.737	701.66	611.038	931.821	491.131	762.307	10.0515	10.0805	9.96302	10.1287	9.92776	9.81518	9.78817	9.54303	9.72634	10.0241	9.77307	9.87153	9.75294	9.75975	9.94428	9.92776	9.83168	9.8271	9.84924	9.87471	9.53948	9.89116	9.45239	9.52342
ARPC3	1707.64	1651.04	1780.17	1393.74	1319.11	1287.54	628.536	645.337	891.393	1458.61	1218.6	1136.44	1087	1035.22	903.763	876.173	992.274	1119.97	971.75	557.73	526.546	772.412	393.311	705.699	10.4743	10.4231	10.5201	10.2831	10.0805	9.7472	9.49052	9.73446	10.1287	10.2642	10.0133	10.039	9.92962	9.91368	9.80013	9.75677	9.93173	10.1253	9.9074	9.53142	9.32755	9.62819	9.14359	9.41463
ARPC4	518.057	592.418	657.147	506.498	449.909	508.238	258.567	182.466	165.975	482.942	428.295	372.772	377.85	337.742	356.625	334.847	305.648	330.393	311.196	202.261	233.152	233.713	157.251	302.341	8.80853	9.00291	9.13163	8.88141	8.61017	8.44793	8.30641	8.1027	8.18754	8.74073	8.57437	8.41305	8.42278	8.31542	8.44727	8.31124	8.22126	8.36101	8.26539	8.094	8.20565	7.94503	7.86932	8.28315
ARPC5	1403.92	1399.03	1367.11	1363.2	1399.98	1678.51	869.559	886.333	751.225	1355.75	1267.83	1063.32	1226.93	1114.76	954.006	1061.33	1066.24	928.217	922.434	647.737	576.834	880.872	434.715	755.705	10.1663	10.1883	10.1238	10.2472	10.1768	10.0946	9.93566	10.1495	9.93377	10.1709	10.0644	9.93067	10.1108	10.0351	9.89116	10.0376	10.0438	9.83168	9.8172	9.75677	9.45493	9.81288	9.27299	9.51473
ARPC5L	878.294	968.174	949.645	855.054	882.054	1144.01	482.651	492.122	566.982	849.35	813.865	585.529	639.465	674.365	763.121	610.448	592.905	543.134	556.909	443.435	405.62	543.396	304.116	499.603	9.52024	9.66388	9.61762	9.57925	9.52256	9.56874	9.1224	9.39105	9.6417	9.50429	9.43126	9.0576	9.15874	9.28076	9.54775	9.17693	9.15246	9.04796	9.08953	9.19537	8.97022	9.1224	8.78164	8.95221
ARPM1	4.3263	0.78075	-4.4678	0.404146	1.84512	-4.65875	-1.60607	-4.22359	1.83752	-2.79383	0.0766451	0.104456	-4.85515	-5.88339	-2.51148	-7.71459	-3.67232	-3.57152	-2.69954	-3.0562	-4.12461	-3.89487	-4.30451	-0.479103	5.05698	4.94704	4.78085	4.9473	4.9815	4.79858	4.87528	4.78004	4.99855	4.83617	4.93121	4.91863	4.75938	4.72156	4.8542	4.67888	4.79772	4.8002	4.82864	4.80445	4.79977	4.80535	4.78756	4.91044
ARPM2	6.17866	2.28807	-1.30849	4.16363	2.42555	-1.6691	-1.42849	3.21302	0.175154	5.77614	0.472809	1.36316	1.14642	0.260288	1.00037	0.439309	-0.12146	5.7716	5.10901	-3.55563	0.331562	4.07323	7.20284	1.01594	5.11519	4.99382	4.88462	5.06838	4.99974	4.87823	4.88194	5.0614	4.93424	5.09717	4.9427	4.95843	4.95057	4.92027	4.96279	4.93993	4.91516	5.097	5.07578	4.78621	4.94408	5.05263	5.17757	4.95707
ARPP19	576.981	521.622	516.08	504.318	546.438	676.891	291.329	248.702	95.8438	630.05	548.012	387.691	362.5	392.122	432.498	448.72	413.485	388.114	391.206	254.645	201.865	421.058	181.17	335.702	8.95776	8.83506	8.82156	8.87532	8.87151	8.8161	8.45429	8.53724	7.54353	9.10479	8.90396	8.47434	8.35869	8.5103	8.71924	8.72498	8.63731	8.58563	8.59241	8.41305	8.02447	8.76089	8.05821	8.41587
ARPP-21	0.142345	0.839057	0.904732	-4.2561	0.76985	-0.829901	0.212108	-1.53362	-0.180581	3.00846	-1.55172	0.673037	-0.133988	0.0696221	0.847973	0.782302	-0.5726	2.21491	-1.94603	-0.0854892	-0.519053	-1.32412	-3.06921	-0.467191	4.91569	4.94916	4.95447	4.79534	4.94963	4.89857	4.94018	4.87841	4.91985	5.01333	4.88166	4.93678	4.91207	4.91368	4.95828	4.9506	4.90121	4.98702	4.85377	4.9048	4.91646	4.88366	4.83095	4.91089
ARR3	2.07086	-1.29342	-2.84444	-0.829474	5.77705	-1.3559	-3.08075	1.65446	0.273268	-5.98688	-0.353798	-4.81419	3.73976	-2.94484	9.00625	5.39232	1.10921	-1.67766	3.17762	-3.24164	-1.6586	1.0767	2.56586	-4.12537	4.98155	4.88067	4.83501	4.90698	5.09767	4.88597	4.8254	5.00242	4.9389	4.73845	4.91672	4.75992	5.03092	4.81376	5.19805	5.0845	4.95383	4.86246	5.0159	4.79786	4.87933	4.95613	5.01533	4.79907
ARRB1	24.4728	16.001	17.8464	20.9239	16.9387	17.3669	10.4833	9.72555	8.96425	14.5764	19.936	17.7368	17.2349	17.8213	18.5638	17.305	14.6914	20.8936	10.1634	19.7884	18.0559	24.0548	13.727	18.7773	5.60386	5.39852	5.47134	5.56862	5.40646	5.29713	5.30231	5.32942	5.35914	5.35239	5.49382	5.38431	5.38779	5.40292	5.44638	5.38204	5.33326	5.49916	5.216	5.58487	5.53346	5.61558	5.41039	5.48351
ARRB2	18.3473	9.60406	14.7505	10.8484	19.6694	12.7886	7.38046	6.97993	6.36175	13.9435	20.2213	20.5758	16.4481	16.5988	16.5748	18.127	14.1276	14.462	21.1817	7.03123	7.61274	12.9748	8.81818	13.4501	5.46047	5.22042	5.38243	5.27965	5.47524	5.20476	5.19196	5.21256	5.21256	5.33441	5.50027	5.4543	5.36917	5.3735	5.39706	5.39921	5.31686	5.34389	5.49936	5.14769	5.18932	5.32465	5.2409	5.33424
ARRDC1	56.6622	56.663	55.3875	44.4817	53.1007	71.675	25.1855	21.7822	22.3775	51.9764	37.2391	69.8246	49.6069	52.7828	70.8154	78.6505	52.9631	46.3852	54.8613	26.3627	29.7329	41.4635	23.0409	26.3378	6.21429	6.22245	6.26032	6.08782	6.13668	6.11485	5.79111	5.80356	5.99778	6.1248	5.87128	6.31137	6.02252	6.07832	6.40693	6.43345	6.10509	6.0317	6.15537	5.78781	5.86978	5.98971	5.74726	5.68492
ARRDC2	41.0891	39.3721	31.0986	31.1234	38.4059	39.4097	17.2332	16.1312	27.274	35.9292	43.1221	37.1557	32.3387	29.0898	35.8894	32.4575	30.9555	32.8257	28.8989	22.974	14.9692	28.097	15.1344	27.9253	5.94628	5.92847	5.79014	5.80939	5.88864	5.69279	5.54581	5.61122	6.16089	5.84057	5.98446	5.79527	5.7082	5.64653	5.8416	5.71271	5.7076	5.77125	5.67566	5.68266	5.43619	5.71297	5.46491	5.72453
ARRDC3	12.7283	12.2767	12.6505	22.9804	12.6593	44.4028	17.8268	16.6158	35.9682	7.27336	17.4428	16.6317	27.6383	20.564	12.6254	27.7055	7.93293	21.5662	33.3087	28.6162	19.4326	6.77466	12.3486	16.2579	5.30758	5.29949	5.32312	5.61707	5.29227	5.77217	5.56303	5.62998	6.40772	5.14182	5.42974	5.36154	5.61799	5.46349	5.29732	5.60658	5.15471	5.51513	5.77125	5.84651	5.57247	5.13877	5.36556	5.41773
ARRDC4	41.7331	35.1798	28.383	31.593	48.7298	117.875	39.1024	24.2897	39.5388	49.6042	35.3291	29.0474	30.3485	29.5405	26.5428	36.4876	33.4807	26.7981	29.3954	25.1742	6.27231	18.3368	4.11383	8.19417	5.96216	5.84057	5.73648	5.82075	6.05734	6.57309	6.11679	5.8788	6.50226	6.08615	5.83995	5.63771	5.67152	5.65346	5.64271	5.79285	5.76016	5.64104	5.68763	5.75567	5.14101	5.47773	5.0695	5.17
ARRDC5	-7.00345	5.09549	-2.67339	-1.99157	-2.26087	-3.69264	-3.76401	-1.09187	-2.17954	-0.185471	1.37156	-3.45503	-2.87811	0.44331	0.209931	-1.44134	1.16556	-1.42711	-4.20595	-2.47934	-1.82056	-0.354584	3.58484	-1.07441	4.66919	5.08166	4.84018	4.87027	4.8531	4.8254	4.80164	4.89511	4.84168	4.91602	4.96926	4.80559	4.82436	4.92691	4.93882	4.88121	4.95569	4.87113	4.78184	4.82415	4.87417	4.91439	5.05162	4.89172
ARS2	1126.83	1248.05	1167.64	1222.15	1303	1599.65	960.267	931.349	1172.95	1373.42	1680.08	980.745	1063.65	993.16	1083.42	955.9	951.911	946.227	1029.4	1011.65	1274.32	1429.14	1173.27	1243.25	9.88367	10.0241	9.91117	10.0973	10.0618	10.0351	10.0786	10.2097	10.4648	10.1899	10.4942	9.79221	9.88765	9.83629	10.0577	9.87153	9.87609	9.85751	10.0044	10.4119	10.5422	10.5521	10.6582	10.1899
[truncated: 19,809 more rows]
[truncated: 37 more columns]
